# Supplementary material for: Investigating synthetic lethality and PARP inhibitor resistance in pancreatic cancer through enantiomer differential activity
Source: Cell Death Discov. 2025 Mar 16;11:106. doi: 10.1038/s41420-025-02382-3 (PMC11911456; doi:10.1038/s41420-025-02382-3)
Supplement: Supplementary file 3 — Supporting Information—Proteomic Profiling [file 41420_2025_2382_MOESM3_ESM.xlsx]

## Sheet: Legend
Tab 1	Legend
Tab 2	Protein Group
Tab 3	volcano plot raw data control vs RS-35d treated cells
Tab 4	List of up- or down- regulated proteins
Tab 5	downregulated proteins - GO Cellular components - ENRICHr
Tab 6	downregulated proteins - GO molecular functions- ENRICHr
Tab 7	downregulated proteins - GO biological processes- ENRICHr
Tab 8	upregulated proteins - GO Cellular components- ENRICHr
Tab 9	upregulated proteins - GO molecular functions- ENRICHr
Tab 10	upregulated proteins - GO biological processes- ENRICHr
Tab 11	BioGRID - RAD51 interactome
Tab 12	BioGRID - ATM interactome
Tab 13	BioGRID - ATR interactome
Tab 14	BioGRID - DNA-Pkcs interactome

## Sheet: Protein Group
											Replicate			Replicate
											1	2	3	1	2	3
Protein Group	Protein ID	Accession	-10lgP	Avg. Mass (Dalton)	#Unique_peptide	unique Coverage (%)	Description	Accession	isoform	protein NAME	treatment RS-35d (35D_1)_1	treatment RS-35d (35D_1)_2	treatment RS-35d (35D_1)_3	C1 - Control_1	C2 - Control_2	C3 - Control_3
4	58	P35579|MYH9_HUMAN	630.39	226530	126	66	Myosin-9 OS=Homo sapiens OX=9606 GN=MYH9 PE=1 SV=4	P35579		MYH9	73366	75912	77943.5	75040	67930	69733
12	45	O43707|ACTN4_HUMAN	552.32	104854	45	71	Alpha-actinin-4 OS=Homo sapiens OX=9606 GN=ACTN4 PE=1 SV=2	O43707		ACTN4	58945.5	60283.5	63570.5	51382.5	71555.5	57394
1	30	P68104|EF1A1_HUMAN	453.49	50141	30	73	Elongation factor 1-alpha 1 OS=Homo sapiens OX=9606 GN=EEF1A1 PE=1 SV=1	P68104		EF1A1	75566	74469.5	79773.5	61278	63713.5	58446.5
19	1	P04075|ALDOA_HUMAN	458.69	39420	28	83	Fructose-bisphosphate aldolase A OS=Homo sapiens OX=9606 GN=ALDOA PE=1 SV=2	P04075		ALDOA	55382.5	63163	63806	55081	62911	55833.5
38	20	P07355|ANXA2_HUMAN	431.37	38604	27	73	Annexin A2 OS=Homo sapiens OX=9606 GN=ANXA2 PE=1 SV=2	P07355		ANXA2	48565	51340	52099	38960.5	41845	44913
26	27	P26038|MOES_HUMAN	466.32	67820	39	75	Moesin OS=Homo sapiens OX=9606 GN=MSN PE=1 SV=3	P26038		MOES	46418.5	47580	50000.5	37866.5	32166.5	41398
53	2197	P62805|H4_HUMAN	345.82	11367	19	62	Histone H4 OS=Homo sapiens OX=9606 GN=H4C1 PE=1 SV=2	P62805		H4	33206	34445.5	37685.5	40599	42742.5	43518
44	3	P00558|PGK1_HUMAN	440.85	44615	32	82	Phosphoglycerate kinase 1 OS=Homo sapiens OX=9606 GN=PGK1 PE=1 SV=3	P00558		PGK1	30473	30831.5	31051.5	26746.5	32209.5	35988
58	698	P31947|1433S_HUMAN	437.56	27774	17	79	14-3-3 protein sigma OS=Homo sapiens OX=9606 GN=SFN PE=1 SV=1	P31947		1433S	35749.5	38386	36414.5	37461.5	37948	38635
24	25	P13639|EF2_HUMAN	517.17	95338	47	67	Elongation factor 2 OS=Homo sapiens OX=9606 GN=EEF2 PE=1 SV=4	P13639		EF2	42365.5	44636.5	46511	40563.5	40146	39263
5	6	P60709|ACTB_HUMAN	444.4	41737	12	86	Actin cytoplasmic 1 OS=Homo sapiens OX=9606 GN=ACTB PE=1 SV=1	P60709		ACTB	42619.5	41759.5	39045	40548.5	45787.5	38933
11	206	Q09666|AHNK_HUMAN	584.48	629114	222	48	Neuroblast differentiation-associated protein AHNAK OS=Homo sapiens OX=9606 GN=AHNAK PE=1 SV=2	Q09666		AHNK	31065	31207	34313.5	29638.5	32192.5	33235
2	83	P07900|HS90A_HUMAN	489.57	84660	32	60	Heat shock protein HSP 90-alpha OS=Homo sapiens OX=9606 GN=HSP90AA1 PE=1 SV=5	P07900		HS90A	42459.5	46257	49341.5	42247	39804	38147
13	14	P06733|ENOA_HUMAN	444.96	47169	33	80	Alpha-enolase OS=Homo sapiens OX=9606 GN=ENO1 PE=1 SV=2	P06733		ENOA	44447	45003	39649.5	38042.5	37782	35177
3	86	P08238|HS90B_HUMAN	484.18	83264	32	65	Heat shock protein HSP 90-beta OS=Homo sapiens OX=9606 GN=HSP90AB1 PE=1 SV=4	P08238		HS90B	30728	32822.5	32206	27511	29976.5	28746.5
33	1943	P23528|COF1_HUMAN	380.53	18502	15	74	Cofilin-1 OS=Homo sapiens OX=9606 GN=CFL1 PE=1 SV=3	P23528		COF1	28407.5	26380	28738.5	32501.5	44050.5	30144.5
57	405	P50454|SERPH_HUMAN	436.67	46441	26	72	Serpin H1 OS=Homo sapiens OX=9606 GN=SERPINH1 PE=1 SV=2	P50454		SERPH	30817	28464	27904.5	33273	28455	28903
59	13	P78371|TCPB_HUMAN	458.82	57488	31	71	T-complex protein 1 subunit beta OS=Homo sapiens OX=9606 GN=CCT2 PE=1 SV=4	P78371		TCPB	27483.5	24301.5	25147.5	25364	17748	26506.5
55	402	P27797|CALR_HUMAN	431.75	48142	27	65	Calreticulin OS=Homo sapiens OX=9606 GN=CALR PE=1 SV=1	P27797		CALR	34691.5	32215.5	33042	26676.5	32457	29110
16	137	P21333-2|FLNA_HUMAN	589.64	280016	104	63	Isoform 2 of Filamin-A OS=Homo sapiens OX=9606 GN=FLNA	P21333	2	FLNA	38048.5	39824	39457	29717.5	36133	29370.5
15	153	O75369-2|FLNB_HUMAN	572.58	275666	107	65	Isoform 2 of Filamin-B OS=Homo sapiens OX=9606 GN=FLNB	O75369	2	FLNB	32029	31466	33209.5	27109.5	27359	27669
119	1620	P04792|HSPB1_HUMAN	361.54	22783	18	86	Heat shock protein beta-1 OS=Homo sapiens OX=9606 GN=HSPB1 PE=1 SV=2	P04792		HSPB1	23397.5	24338	32417.5	27100	22420.5	25923
27	33	P11142|HSP7C_HUMAN	467.06	70898	33	76	Heat shock cognate 71 kDa protein OS=Homo sapiens OX=9606 GN=HSPA8 PE=1 SV=1	P11142		HSP7C	29864	30762.5	26681.5	25505.5	25899	25936
28	231	Q00610|CLH1_HUMAN	539.25	191613	61	50	Clathrin heavy chain 1 OS=Homo sapiens OX=9606 GN=CLTC PE=1 SV=5	Q00610		CLH1	20092	21077	19171.5	24069	23877	24965.5
36	32	P10809|CH60_HUMAN	438.67	61055	36	68	60 kDa heat shock protein mitochondrial OS=Homo sapiens OX=9606 GN=HSPD1 PE=1 SV=2	P10809		CH60	25365	29781.5	23205.5	26061.5	24624	25329
62	546	P04083|ANXA1_HUMAN	399.86	38714	24	67	Annexin A1 OS=Homo sapiens OX=9606 GN=ANXA1 PE=1 SV=2	P04083		ANXA1	32785.5	33178	27741	23153	21480.5	23177
14	549	P22626|ROA2_HUMAN	437.56	37430	24	67	Heterogeneous nuclear ribonucleoproteins A2/B1 OS=Homo sapiens OX=9606 GN=HNRNPA2B1 PE=1 SV=2	P22626		ROA2	29520	30298	33471	40874.5	28860	26153.5
10	22	P14618|KPYM_HUMAN	498.86	57937	5	85	Pyruvate kinase PKM OS=Homo sapiens OX=9606 GN=PKM PE=1 SV=4	P14618		KPYM	23968.5	26517.5	28113.5	31213.5	28375	25786.5
25	136	P12814-3|ACTN1_HUMAN	485.86	105568	32	61	Isoform 3 of Alpha-actinin-1 OS=Homo sapiens OX=9606 GN=ACTN1	P12814	3	ACTN1	22350.5	22908	25417.5	21142	19798.5	21900.5
18	138	Q14204|DYHC1_HUMAN	618.68	532412	166	46	Cytoplasmic dynein 1 heavy chain 1 OS=Homo sapiens OX=9606 GN=DYNC1H1 PE=1 SV=5	Q14204		DYHC1	23348	25421.5	22494	19249	22460.5	20247.5
31	46	P11021|BIP_HUMAN	488.05	72333	46	69	Endoplasmic reticulum chaperone BiP OS=Homo sapiens OX=9606 GN=HSPA5 PE=1 SV=2	P11021		BIP	59114	51689.5	49173.5	20750	22013	20967
34	223	P49327|FAS_HUMAN	564.92	273424	75	47	Fatty acid synthase OS=Homo sapiens OX=9606 GN=FASN PE=1 SV=3	P49327		FAS	18923.5	16361	17754.5	20828	20897	19882.5
52	1674	Q06830|PRDX1_HUMAN	386.61	22110	16	76	Peroxiredoxin-1 OS=Homo sapiens OX=9606 GN=PRDX1 PE=1 SV=1	Q06830		PRDX1	17729.5	24120.5	23149	21420.5	20923.5	19833.5
63	640	P07195|LDHB_HUMAN	406.51	36639	20	75	L-lactate dehydrogenase B chain OS=Homo sapiens OX=9606 GN=LDHB PE=1 SV=2	P07195		LDHB	20128	20745.5	20828	19098.5	21447	19270.5
135	1656	P30041|PRDX6_HUMAN	366.39	25035	16	70	Peroxiredoxin-6 OS=Homo sapiens OX=9606 GN=PRDX6 PE=1 SV=3	P30041		PRDX6	16846	18326.5	18600	17876.5	17629.5	18125
40	103	P15924|DESP_HUMAN	525.37	331774	123	48	Desmoplakin OS=Homo sapiens OX=9606 GN=DSP PE=1 SV=3	P15924		DESP	14031.5	12316	11398.5	15499	17965	17846.5
51	116	P15311|EZRI_HUMAN	395.91	69413	28	59	Ezrin OS=Homo sapiens OX=9606 GN=EZR PE=1 SV=4	P15311		EZRI	18667.5	19286.5	19074.5	14672	17310	17440
142	26	Q16658|FSCN1_HUMAN	365.05	54530	27	70	Fascin OS=Homo sapiens OX=9606 GN=FSCN1 PE=1 SV=3	Q16658		FSCN1	15588.5	17384	13510	15026.5	14477.5	16534
72	584	P00338|LDHA_HUMAN	386.16	36689	23	77	L-lactate dehydrogenase A chain OS=Homo sapiens OX=9606 GN=LDHA PE=1 SV=2	P00338		LDHA	16340.5	12383	13240.5	13358	14558	15649
64	50	P11413|G6PD_HUMAN	431.57	59257	30	78	Glucose-6-phosphate 1-dehydrogenase OS=Homo sapiens OX=9606 GN=G6PD PE=1 SV=4	P11413		G6PD	14876.5	15287	17373.5	24309	20903	19842
90	37	P06576|ATPB_HUMAN	392.99	56560	23	69	ATP synthase subunit beta mitochondrial OS=Homo sapiens OX=9606 GN=ATP5F1B PE=1 SV=3	P06576		ATPB	14710.5	15381.5	13766.5	16955.5	17378	16654.5
47	113	P14625|ENPL_HUMAN	436	92469	44	61	Endoplasmin OS=Homo sapiens OX=9606 GN=HSP90B1 PE=1 SV=1	P14625		ENPL	22077.5	30750	19221.5	16766.5	23905.5	16120.5
66	76	P0DMV8|HS71A_HUMAN	410.24	70052	22	70	Heat shock 70 kDa protein 1A OS=Homo sapiens OX=9606 GN=HSPA1A PE=1 SV=1	P0DMV8		HS71A	14085	15470	15731	15568.5	12970	15465
911	5171	P68431|H31_HUMAN	169.57	15404	6	34	Histone H3.1 OS=Homo sapiens OX=9606 GN=H3C1 PE=1 SV=2	P68431		H31	13830.5	14699	8306.9	12969	14384	14756
71	97	P55072|TERA_HUMAN	421.07	89322	42	62	Transitional endoplasmic reticulum ATPase OS=Homo sapiens OX=9606 GN=VCP PE=1 SV=4	P55072		TERA	13585.5	13590	14161	14423.5	17138	15309
29	69	Q01082|SPTB2_HUMAN	572.9	274608	84	48	Spectrin beta chain non-erythrocytic 1 OS=Homo sapiens OX=9606 GN=SPTBN1 PE=1 SV=2	Q01082		SPTB2	14128	14166	14554.5	15431.5	15571.5	15386.5
69	40	P30101|PDIA3_HUMAN	439.87	56782	34	70	Protein disulfide-isomerase A3 OS=Homo sapiens OX=9606 GN=PDIA3 PE=1 SV=4	P30101		PDIA3	19545.5	20983.5	21655.5	16924	15899	16053.5
101	160	Q00839|HNRPU_HUMAN	447.78	90585	40	55	Heterogeneous nuclear ribonucleoprotein U OS=Homo sapiens OX=9606 GN=HNRNPU PE=1 SV=6	Q00839		HNRPU	13310.5	14837.5	11415.5	12396	10126	12661.5
94	512	P63104|1433Z_HUMAN	357.66	27745	15	86	14-3-3 protein zeta/delta OS=Homo sapiens OX=9606 GN=YWHAZ PE=1 SV=1	P63104		1433Z	11548.5	12494.5	11836	10858.5	12283.5	12862
220	2015	P37802-2|TAGL2_HUMAN	295.76	24454	13	49	Isoform 2 of Transgelin-2 OS=Homo sapiens OX=9606 GN=TAGLN2	P37802	2	TAGL2	13734.5	11452	10899	10247.5	9034.15	11966
181	57	P14866|HNRPL_HUMAN	383.11	64133	24	60	Heterogeneous nuclear ribonucleoprotein L OS=Homo sapiens OX=9606 GN=HNRNPL PE=1 SV=2	P14866		HNRPL	12967	11213.8	13699	12710	12021.5	13421.5
414	5638	P60903|S10AA_HUMAN	221.83	11203	4	46	Protein S100-A10 OS=Homo sapiens OX=9606 GN=S100A10 PE=1 SV=2	P60903		S10AA	14082	17160.5	15817.5	12029.9	14128.5	13847.5
82	547	P26641|EF1G_HUMAN	360.37	50119	21	55	Elongation factor 1-gamma OS=Homo sapiens OX=9606 GN=EEF1G PE=1 SV=3	P26641		EF1G	15972.5	15932.5	16493	12835	13171	13431
79	488	P23246|SFPQ_HUMAN	410.4	76150	25	38	Splicing factor proline- and glutamine-rich OS=Homo sapiens OX=9606 GN=SFPQ PE=1 SV=2	P23246		SFPQ	13405.2	15931	13294.5	13010	10509.1	13029
102	323	Q08211|DHX9_HUMAN	398.97	140958	37	40	ATP-dependent RNA helicase A OS=Homo sapiens OX=9606 GN=DHX9 PE=1 SV=4	Q08211		DHX9	9474.15	10045	10073.5	12325.5	10005.5	12445
54	3253	P09211|GSTP1_HUMAN	342.22	23356	13	70	Glutathione S-transferase P OS=Homo sapiens OX=9606 GN=GSTP1 PE=1 SV=2	P09211		GSTP1	12995.5	23034	19957.5	18739.5	17325.5	15725
70	17	P38646|GRP75_HUMAN	418.99	73681	35	60	Stress-70 protein mitochondrial OS=Homo sapiens OX=9606 GN=HSPA9 PE=1 SV=2	P38646		GRP75	11058.5	11816	10683	12627.5	12336.5	12810
68	188	P53621|COPA_HUMAN	457.06	138345	53	55	Coatomer subunit alpha OS=Homo sapiens OX=9606 GN=COPA PE=1 SV=2	P53621		COPA	11922.5	13855.5	12203	12084	11717	12294.5
124	74	P13796|PLSL_HUMAN	412.02	70289	25	69	Plastin-2 OS=Homo sapiens OX=9606 GN=LCP1 PE=1 SV=6	P13796		PLSL	12204	14794	12287.5	11052.5	10689	11797
75	210	Q9NZM1|MYOF_HUMAN	466.3	234706	64	41	Myoferlin OS=Homo sapiens OX=9606 GN=MYOF PE=1 SV=1	Q9NZM1		MYOF	9565.85	8415.45	8771.1	9742.65	10409.5	11458
160	426	P12956|XRCC6_HUMAN	402.59	69843	33	57	X-ray repair cross-complementing protein 6 OS=Homo sapiens OX=9606 GN=XRCC6 PE=1 SV=2	P12956		XRCC6	9277.55	9523.8	7944.55	11720.5	12041.5	12171
139	495	P21980|TGM2_HUMAN	370.07	77329	25	52	Protein-glutamine gamma-glutamyltransferase 2 OS=Homo sapiens OX=9606 GN=TGM2 PE=1 SV=2	P21980		TGM2	12090	11486.5	12427.5	10927.1	11370.5	12174
138	1179	P62258|1433E_HUMAN	371.95	29174	17	67	14-3-3 protein epsilon OS=Homo sapiens OX=9606 GN=YWHAE PE=1 SV=1	P62258		1433E	10160.5	10114.4	11799	11764.5	12835	12168
21	1058	P09651-2|ROA1_HUMAN	441.95	34196	7	59	Isoform A1-A of Heterogeneous nuclear ribonucleoprotein A1 OS=Homo sapiens OX=9606 GN=HNRNPA1	P09651	2	ROA1	17775	19231.7	16769	15284	11873.5	12654.5
209	1647	Q99497|PARK7_HUMAN	376.66	19891	14	76	Parkinson disease protein 7 OS=Homo sapiens OX=9606 GN=PARK7 PE=1 SV=2	Q99497		PARK7	10393	10535	10475.7	11192.5	11944.5	11928
161	99	Q14152|EIF3A_HUMAN	425.17	166569	55	40	Eukaryotic translation initiation factor 3 subunit A OS=Homo sapiens OX=9606 GN=EIF3A PE=1 SV=1	Q14152		EIF3A	6495.25	9541.6	6196.15	10396	7800.1	10661.8
87	114	P29401|TKT_HUMAN	444.13	67878	34	73	Transketolase OS=Homo sapiens OX=9606 GN=TKT PE=1 SV=3	P29401		TKT	14456	13466.5	13613.5	11995	11855	11861
106	207	P42704|LPPRC_HUMAN	464.44	157904	53	48	Leucine-rich PPR motif-containing protein mitochondrial OS=Homo sapiens OX=9606 GN=LRPPRC PE=1 SV=3	P42704		LPPRC	8104.75	7840.7	7551.4	11132.5	12095	11556.5
152	312	Q12906-7|ILF3_HUMAN	390.31	95808	34	46	Isoform 7 of Interleukin enhancer-binding factor 3 OS=Homo sapiens OX=9606 GN=ILF3	Q12906	7	ILF3	10361.5	11329.1	9007.9	11887	10554	11254.5
130	1608	P04181|OAT_HUMAN	379.82	48535	19	63	Ornithine aminotransferase mitochondrial OS=Homo sapiens OX=9606 GN=OAT PE=1 SV=1	P04181		OAT	7454.45	6838.15	6769.75	8389.25	10501	11017
60	101	P46940|IQGA1_HUMAN	494.13	189251	70	54	Ras GTPase-activating-like protein IQGAP1 OS=Homo sapiens OX=9606 GN=IQGAP1 PE=1 SV=1	P46940		IQGA1	11681	12362.5	10913.5	12927	12103.5	12059.5
235	736	P23526|SAHH_HUMAN	344.22	47716	16	46	Adenosylhomocysteinase OS=Homo sapiens OX=9606 GN=AHCY PE=1 SV=4	P23526		SAHH	9507.1	10982.9	9287.15	10551	10678	11078
445	9179	P06454-2|PTMA_HUMAN	213.65	12074	5	24	Isoform 2 of Prothymosin alpha OS=Homo sapiens OX=9606 GN=PTMA	P06454	2	PTMA	7905.2	7548.85	9283.7	12045	7494.45	10850.5
49	257	P78527|PRKDC_HUMAN	537.93	469093	108	34	DNA-dependent protein kinase catalytic subunit OS=Homo sapiens OX=9606 GN=PRKDC PE=1 SV=3	P78527		PRKDC	9979.7	10356.5	10203.7	10538	11632.5	10821.5
166	866	P36952|SPB5_HUMAN	398.84	42100	25	74	Serpin B5 OS=Homo sapiens OX=9606 GN=SERPINB5 PE=1 SV=2	P36952		SPB5	10661	12050	10661.1	11059.5	11597.5	10939.5
92	34	P07237|PDIA1_HUMAN	386.01	57116	30	61	Protein disulfide-isomerase OS=Homo sapiens OX=9606 GN=P4HB PE=1 SV=3	P07237		PDIA1	12431.5	11610	11413	10874.5	11685.5	10956
56	545	P06753-2|TPM3_HUMAN	406.45	29033	14	74	Isoform 2 of Tropomyosin alpha-3 chain OS=Homo sapiens OX=9606 GN=TPM3	P06753	2	TPM3	8358.8	8761.95	10440.5	12158.5	15455.5	11344
210	2379	P18124|RL7_HUMAN	279.69	29226	9	34	60S ribosomal protein L7 OS=Homo sapiens OX=9606 GN=RPL7 PE=1 SV=1	P18124		RL7	10488.9	12010.5	9874.8	10441.8	9576.9	10381
162	193	P31040|SDHA_HUMAN	424.96	72692	31	63	Succinate dehydrogenase [ubiquinone] flavoprotein subunit mitochondrial OS=Homo sapiens OX=9606 GN=SDHA PE=1 SV=2	P31040		SDHA	5744.05	5773.5	5713	8331.9	9166.45	9582.7
300	2967	P61313|RL15_HUMAN	257.45	24146	7	36	60S ribosomal protein L15 OS=Homo sapiens OX=9606 GN=RPL15 PE=1 SV=2	P61313		RL15	9076.65	10005.1	10498	11337	7844.85	10131
302	1312	Q15233|NONO_HUMAN	289.82	54232	17	41	Non-POU domain-containing octamer-binding protein OS=Homo sapiens OX=9606 GN=NONO PE=1 SV=4	Q15233		NONO	10185.6	8188.3	9181.75	10929.5	11428.5	10458
126	183	Q13200|PSMD2_HUMAN	403.09	100200	34	48	26S proteasome non-ATPase regulatory subunit 2 OS=Homo sapiens OX=9606 GN=PSMD2 PE=1 SV=3	Q13200		PSMD2	8482.45	7087.5	8871.5	9992.8	9218.1	9969.3
202	1495	P18669|PGAM1_HUMAN	347.88	28804	16	68	Phosphoglycerate mutase 1 OS=Homo sapiens OX=9606 GN=PGAM1 PE=1 SV=2	P18669		PGAM1	8997.35	9193.8	8697.2	9719.4	10980.5	10029
107	552	P48643|TCPE_HUMAN	383.78	59671	23	54	T-complex protein 1 subunit epsilon OS=Homo sapiens OX=9606 GN=CCT5 PE=1 SV=1	P48643		TCPE	8431.65	8366.05	9712.1	7883.6	9084.65	9446.45
319	3151	P25787|PSA2_HUMAN	315.54	25899	10	49	Proteasome subunit alpha type-2 OS=Homo sapiens OX=9606 GN=PSMA2 PE=1 SV=2	P25787		PSA2	4093.7	3903.1	4190.85	4597.55	7221.75	7309.85
83	82	O60437|PEPL_HUMAN	468.44	204745	71	46	Periplakin OS=Homo sapiens OX=9606 GN=PPL PE=1 SV=4	O60437		PEPL	6159.05	5922	6919.55	8733.25	10599	9688.1
198	472	P06744|G6PI_HUMAN	350.41	63147	24	58	Glucose-6-phosphate isomerase OS=Homo sapiens OX=9606 GN=GPI PE=1 SV=4	P06744		G6PI	11018.5	8016.65	8150.2	8496.7	9978.05	9876.2
188	1066	P30838|AL3A1_HUMAN	387.06	50395	20	51	Aldehyde dehydrogenase dimeric NADP-preferring OS=Homo sapiens OX=9606 GN=ALDH3A1 PE=1 SV=3	P30838		AL3A1	6479.25	7054.6	7491.75	7361.45	9996.15	9804
127	1065	P51991|ROA3_HUMAN	392.58	39595	24	49	Heterogeneous nuclear ribonucleoprotein A3 OS=Homo sapiens OX=9606 GN=HNRNPA3 PE=1 SV=2	P51991		ROA3	10897.2	13325.5	8618.15	9011.1	8333.55	9425.15
284	1570	P46777|RL5_HUMAN	311.28	34363	12	47	60S ribosomal protein L5 OS=Homo sapiens OX=9606 GN=RPL5 PE=1 SV=3	P46777		RL5	11110	10717.5	10744.9	9407.1	10644	9655.9
169	52	P25705|ATPA_HUMAN	391.92	59751	22	53	ATP synthase subunit alpha mitochondrial OS=Homo sapiens OX=9606 GN=ATP5F1A PE=1 SV=1	P25705		ATPA	7727.7	6868.7	6548.5	8292.85	8506.45	8944.5
148	1105	P09429|HMGB1_HUMAN	386.65	24894	16	55	High mobility group protein B1 OS=Homo sapiens OX=9606 GN=HMGB1 PE=1 SV=3	P09429		HMGB1	9651.65	10599.1	10133.6	9846.75	11081	9834.15
150	575	P14923|PLAK_HUMAN	390.77	81745	18	46	Junction plakoglobin OS=Homo sapiens OX=9606 GN=JUP PE=1 SV=3	P14923		PLAK	9206.9	8896	8613.8	8720.2	9144.1	9241.4
104	3960	P10599|THIO_HUMAN	294.8	11737	9	89	Thioredoxin OS=Homo sapiens OX=9606 GN=TXN PE=1 SV=3	P10599		THIO	11478	16402.5	13446.5	14298	13242.5	11467.1
180	476	P08195-2|4F2_HUMAN	376.2	57945	21	47	Isoform 2 of 4F2 cell-surface antigen heavy chain OS=Homo sapiens OX=9606 GN=SLC3A2	P08195	2	4F2	8863.7	12004.5	10141.3	7261.15	8587.15	8457.95
73	100	P13667|PDIA4_HUMAN	454.97	72933	39	57	Protein disulfide-isomerase A4 OS=Homo sapiens OX=9606 GN=PDIA4 PE=1 SV=2	P13667		PDIA4	12108.5	11905.5	10961.5	10485.5	10558	9853.6
276	1161	P60174|TPIS_HUMAN	343.59	30791	15	65	Triosephosphate isomerase OS=Homo sapiens OX=9606 GN=TPI1 PE=1 SV=3	P60174		TPIS	9766.95	10265.5	10661	9546.3	8992.7	9395.1
309	3077	P18621-3|RL17_HUMAN	290.6	26373	10	36	Isoform 3 of 60S ribosomal protein L17 OS=Homo sapiens OX=9606 GN=RPL17	P18621	3	RL17	9156.45	10151.8	9822.85	8644.65	14424	9217
129	271	P27824-2|CALX_HUMAN	385.15	71503	33	54	Isoform 2 of Calnexin OS=Homo sapiens OX=9606 GN=CANX	P27824	2	CALX	8934.3	7400.35	7262	7668.4	9034.65	8909
141	624	P04843|RPN1_HUMAN	378.12	68569	19	42	Dolichyl-diphosphooligosaccharide--protein glycosyltransferase subunit 1 OS=Homo sapiens OX=9606 GN=RPN1 PE=1 SV=1	P04843		RPN1	9357.5	11866	10222.4	10505.2	8880.6	9002.95
324	823	P09622|DLDH_HUMAN	325.95	54177	15	51	Dihydrolipoyl dehydrogenase mitochondrial OS=Homo sapiens OX=9606 GN=DLD PE=1 SV=2	P09622		DLDH	6640	6248.1	6576.1	9250.3	10024.2	9103.3
254	3069	P07737|PROF1_HUMAN	282.03	15054	12	74	Profilin-1 OS=Homo sapiens OX=9606 GN=PFN1 PE=1 SV=2	P07737		PROF1	11627.6	12087.2	9225.35	7908.5	6643.8	8550.7
145	748	P26599|PTBP1_HUMAN	416.24	57221	20	68	Polypyrimidine tract-binding protein 1 OS=Homo sapiens OX=9606 GN=PTBP1 PE=1 SV=1	P26599		PTBP1	8943.2	8220.3	6845.4	5725.6	7514.9	7921.65
17	950	P68032|ACTC_HUMAN	364.79	42019	5	46	Actin alpha cardiac muscle 1 OS=Homo sapiens OX=9606 GN=ACTC1 PE=1 SV=1	P68032		ACTC	13828	14205	15287.5	8058.55	9712.8	8720.25
375	3801	P60660|MYL6_HUMAN	248.2	16930	5	64	Myosin light polypeptide 6 OS=Homo sapiens OX=9606 GN=MYL6 PE=1 SV=2	P60660		MYL6	6219.95	5732.9	5719.05	7453.5	8231.8	8209.45
157	332	P55060-3|XPO2_HUMAN	433.06	107777	31	42	Isoform 3 of Exportin-2 OS=Homo sapiens OX=9606 GN=CSE1L	P55060	3	XPO2	10194.3	7887.3	7410.75	8942.2	8206.95	8643.55
192	87	Q16666-2|IF16_HUMAN	355.89	82096	26	51	Isoform 2 of Gamma-interferon-inducible protein 16 OS=Homo sapiens OX=9606 GN=IFI16	Q16666	2	IF16	8376.6	8176.8	9784.3	6451.9	5862.05	7441.75
154	49	Q7KZF4|SND1_HUMAN	397.35	101997	33	53	Staphylococcal nuclease domain-containing protein 1 OS=Homo sapiens OX=9606 GN=SND1 PE=1 SV=1	Q7KZF4		SND1	7223.75	7098.9	5566.3	6793.9	6914.65	7749.55
189	813	P43490|NAMPT_HUMAN	424.62	55521	22	57	Nicotinamide phosphoribosyltransferase OS=Homo sapiens OX=9606 GN=NAMPT PE=1 SV=1	P43490		NAMPT	11493.5	10608.5	11249	7118.3	5866.85	7615.75
128	133	P13010|XRCC5_HUMAN	382.37	82705	36	59	X-ray repair cross-complementing protein 5 OS=Homo sapiens OX=9606 GN=XRCC5 PE=1 SV=3	P13010		XRCC5	6825.85	7350.25	7356.2	7596.15	8472.5	8024.8
214	1219	Q13283|G3BP1_HUMAN	379.19	52164	16	43	Ras GTPase-activating protein-binding protein 1 OS=Homo sapiens OX=9606 GN=G3BP1 PE=1 SV=1	Q13283		G3BP1	6052.85	6512.7	6142.25	5551.15	9935.4	7691.05
171	128	P47895|AL1A3_HUMAN	356.16	56109	25	65	Aldehyde dehydrogenase family 1 member A3 OS=Homo sapiens OX=9606 GN=ALDH1A3 PE=1 SV=2	P47895		AL1A3	9742.6	7287.35	7099.9	6249.65	8146.15	8149.6
439	5000	P62937|PPIA_HUMAN	279.87	18012	10	61	Peptidyl-prolyl cis-trans isomerase A OS=Homo sapiens OX=9606 GN=PPIA PE=1 SV=2	P62937		PPIA	11005.8	11299.5	8087.45	10009.2	8865.2	8544.75
244	781	P61247|RS3A_HUMAN	329.93	29945	16	59	40S ribosomal protein S3a OS=Homo sapiens OX=9606 GN=RPS3A PE=1 SV=2	P61247		RS3A	7583.9	10185	9175.55	9305.6	8822.85	8723.6
259	2498	P62424|RL7A_HUMAN	327.86	29996	12	40	60S ribosomal protein L7a OS=Homo sapiens OX=9606 GN=RPL7A PE=1 SV=2	P62424		RL7A	8270.6	8817.4	9128.15	8863.6	7731.85	8169.9
321	1623	P40926|MDHM_HUMAN	331.18	35503	14	50	Malate dehydrogenase mitochondrial OS=Homo sapiens OX=9606 GN=MDH2 PE=1 SV=3	P40926		MDHM	8256.4	6970.05	7350.75	7254.9	10863.5	8105.1
61	4185	P62244|RS15A_HUMAN	219.97	14840	6	48	40S ribosomal protein S15a OS=Homo sapiens OX=9606 GN=RPS15A PE=1 SV=2	P62244		RS15A	8645.85	15015	14099.5	13963.5	11957	10306.3
122	220	Q14980|NUMA1_HUMAN	467.03	238257	62	42	Nuclear mitotic apparatus protein 1 OS=Homo sapiens OX=9606 GN=NUMA1 PE=1 SV=2	Q14980		NUMA1	5590.7	5334.7	5850.25	8355.7	7855.85	8037.4
205	1590	P15880|RS2_HUMAN	284.37	31324	12	47	40S ribosomal protein S2 OS=Homo sapiens OX=9606 GN=RPS2 PE=1 SV=2	P15880		RS2	11167	15661.6	13331.4	9657.9	8261	8103
327	1648	Q02878|RL6_HUMAN	328.54	32728	12	38	60S ribosomal protein L6 OS=Homo sapiens OX=9606 GN=RPL6 PE=1 SV=3	Q02878		RL6	8854.4	9549.05	8765.6	8214.85	8873.05	8232.3
164	106	P26639|SYTC_HUMAN	376.58	83435	37	62	Threonine--tRNA ligase 1 cytoplasmic OS=Homo sapiens OX=9606 GN=TARS1 PE=1 SV=3	P26639		SYTC	8107.65	8629.7	7608.4	7792.9	7386.65	7726.3
496	2069	Q9UL46|PSME2_HUMAN	273.66	27402	8	56	Proteasome activator complex subunit 2 OS=Homo sapiens OX=9606 GN=PSME2 PE=1 SV=4	Q9UL46		PSME2	7211.05	7592.55	7090.7	7590	6418.5	7618.7
462	4002	Q03135|CAV1_HUMAN	295	20472	8	51	Caveolin-1 OS=Homo sapiens OX=9606 GN=CAV1 PE=1 SV=4	Q03135		CAV1	6916.35	5865.75	6789.95	7402.4	5678.8	7745.65
147	767	P39023|RL3_HUMAN	345.02	46109	18	49	60S ribosomal protein L3 OS=Homo sapiens OX=9606 GN=RPL3 PE=1 SV=2	P39023		RL3	11967.5	11656.5	10507	7825.4	8894.05	8115.7
131	267	P19338|NUCL_HUMAN	374.23	76615	23	35	Nucleolin OS=Homo sapiens OX=9606 GN=NCL PE=1 SV=3	P19338		NUCL	13326.5	10869.5	10696.5	10627	8461.35	8108.05
184	746	P49411|EFTU_HUMAN	373.08	49542	20	58	Elongation factor Tu mitochondrial OS=Homo sapiens OX=9606 GN=TUFM PE=1 SV=2	P49411		EFTU	5468.7	6002.55	5818.9	6876	6259.95	7253.45
121	107	P13797|PLST_HUMAN	393.61	70811	24	59	Plastin-3 OS=Homo sapiens OX=9606 GN=PLS3 PE=1 SV=4	P13797		PLST	8048	7999.05	8831.25	6557.75	6970.25	7280.8
173	2962	P32119|PRDX2_HUMAN	355.62	21892	15	67	Peroxiredoxin-2 OS=Homo sapiens OX=9606 GN=PRDX2 PE=1 SV=5	P32119		PRDX2	6741.6	6647.3	7154.35	7998.5	8156.95	7726.15
231	845	P36578|RL4_HUMAN	342.25	47697	19	40	60S ribosomal protein L4 OS=Homo sapiens OX=9606 GN=RPL4 PE=1 SV=5	P36578		RL4	7191.9	5790.65	5938.15	5613.05	7484.75	7407.1
396	2456	P60981|DEST_HUMAN	301.48	18506	13	58	Destrin OS=Homo sapiens OX=9606 GN=DSTN PE=1 SV=3	P60981		DEST	7253.85	6240.1	6725.05	6903.9	7450.8	7363.9
283	1546	Q9NR45|SIAS_HUMAN	328.81	40308	17	61	Sialic acid synthase OS=Homo sapiens OX=9606 GN=NANS PE=1 SV=2	Q9NR45		SIAS	5614.3	6711.45	6290	5090.75	4842	6164.35
373	2701	Q07666|KHDR1_HUMAN	269.02	48227	9	20	KH domain-containing RNA-binding signal transduction-associated protein 1 OS=Homo sapiens OX=9606 GN=KHDRBS1 PE=1 SV=1	Q07666		KHDR1	6403.95	5596.3	5750.45	6635.15	6398.5	7036.65
144	1302	P51858|HDGF_HUMAN	345.58	26788	17	73	Hepatoma-derived growth factor OS=Homo sapiens OX=9606 GN=HDGF PE=1 SV=1	P51858		HDGF	6655.15	9335.55	9023.65	11632	8688.35	8498.55
140	124	P09874|PARP1_HUMAN	399.43	113084	35	40	Poly [ADP-ribose] polymerase 1 OS=Homo sapiens OX=9606 GN=PARP1 PE=1 SV=4	P09874		PARP1	5655.5	5592.1	6093.85	7288.95	6643.35	7166.2
264	855	P50991|TCPD_HUMAN	344.05	57924	17	53	T-complex protein 1 subunit delta OS=Homo sapiens OX=9606 GN=CCT4 PE=1 SV=4	P50991		TCPD	8631	9083.95	8729.35	6939.85	8306	7306.85
204	237	P49588|SYAC_HUMAN	405.16	106810	34	55	Alanine--tRNA ligase cytoplasmic OS=Homo sapiens OX=9606 GN=AARS1 PE=1 SV=2	P49588		SYAC	11143	11195	8072.55	5236.9	5833.2	6510.5
76	92	P07814|SYEP_HUMAN	477.54	170590	63	56	Bifunctional glutamate/proline--tRNA ligase OS=Homo sapiens OX=9606 GN=EPRS1 PE=1 SV=5	P07814		SYEP	9271	9409.55	9752.65	7193.4	7347.2	7008.55
108	129	P35221|CTNA1_HUMAN	461.76	100071	30	58	Catenin alpha-1 OS=Homo sapiens OX=9606 GN=CTNNA1 PE=1 SV=1	P35221		CTNA1	7125.4	6391.1	6930.7	6396.55	7264.1	6915.2
178	282	O60716-21|CTND1_HUMAN	409.77	92675	37	57	Isoform 3A of Catenin delta-1 OS=Homo sapiens OX=9606 GN=CTNND1	O60716	21	CTND1	7921.15	7244.35	6712.3	8673.4	7995.95	7659.15
291	115	P07384|CAN1_HUMAN	352.82	81890	27	50	Calpain-1 catalytic subunit OS=Homo sapiens OX=9606 GN=CAPN1 PE=1 SV=1	P07384		CAN1	5602.2	5920.9	4566.2	5400.1	6027.85	6523.65
452	6585	P62328|TYB4_HUMAN	227.73	5053	5	57	Thymosin beta-4 OS=Homo sapiens OX=9606 GN=TMSB4X PE=1 SV=2	P62328		TYB4	6901.55	7202.25	8287.75	6899.25	5300.55	6741.65
111	318	Q9Y490|TLN1_HUMAN	506.88	269765	60	37	Talin-1 OS=Homo sapiens OX=9606 GN=TLN1 PE=1 SV=3	Q9Y490		TLN1	6823.75	6241.2	7063.65	7250.6	6451.4	6821.65
115	145	P11216|PYGB_HUMAN	453.42	96696	39	52	Glycogen phosphorylase brain form OS=Homo sapiens OX=9606 GN=PYGB PE=1 SV=5	P11216		PYGB	8237	8443.15	8428.5	6321.95	7080.9	6608.4
99	4085	P63241-2|IF5A1_HUMAN	397.53	20170	8	52	Isoform 2 of Eukaryotic translation initiation factor 5A-1 OS=Homo sapiens OX=9606 GN=EIF5A	P63241	2	IF5A1	6155.8	6965.65	6813.4	7056.5	7053.6	6915.75
766	4856	P08708|RS17_HUMAN	211.48	15550	9	66	40S ribosomal protein S17 OS=Homo sapiens OX=9606 GN=RPS17 PE=1 SV=2	P08708		RS17	2460.75	2448.75	10780.9	1635.25	4733.6	4335.05
105	421	P60842|IF4A1_HUMAN	369.4	46154	11	62	Eukaryotic initiation factor 4A-I OS=Homo sapiens OX=9606 GN=EIF4A1 PE=1 SV=1	P60842		IF4A1	7916.05	7921.75	8142.4	6756.3	6127.75	6451.6
680	5857	P60953|CDC42_HUMAN	203.1	21259	4	26	Cell division control protein 42 homolog OS=Homo sapiens OX=9606 GN=CDC42 PE=1 SV=2	P60953		CDC42	4329.85	3563.75	3436.7	4047.9	4835.75	5711.25
303	971	Q9NZN4|EHD2_HUMAN	351.33	61162	18	48	EH domain-containing protein 2 OS=Homo sapiens OX=9606 GN=EHD2 PE=1 SV=2	Q9NZN4		EHD2	3919.05	3346.45	3831.65	5918.45	6223.75	6500.2
179	915	Q02790|FKBP4_HUMAN	382.74	51805	23	59	Peptidyl-prolyl cis-trans isomerase FKBP4 OS=Homo sapiens OX=9606 GN=FKBP4 PE=1 SV=3	Q02790		FKBP4	5647.35	7042.6	7979.8	6494.35	6678.8	6583.55
208	39	Q07065|CKAP4_HUMAN	375.75	66023	23	56	Cytoskeleton-associated protein 4 OS=Homo sapiens OX=9606 GN=CKAP4 PE=1 SV=2	Q07065		CKAP4	5571.9	5736.75	6914.55	6689.85	5966.45	6572.45
340	1499	P62701|RS4X_HUMAN	285.65	29598	15	56	40S ribosomal protein S4 X isoform OS=Homo sapiens OX=9606 GN=RPS4X PE=1 SV=2	P62701		RS4X	8762.45	8594.3	8956.15	6539.75	7422.75	6585.2
193	465	P16615|AT2A2_HUMAN	395.08	114757	27	32	Sarcoplasmic/endoplasmic reticulum calcium ATPase 2 OS=Homo sapiens OX=9606 GN=ATP2A2 PE=1 SV=1	P16615		AT2A2	6169.7	6152.15	5797.45	6756.95	6436.55	6567.45
409	1172	P05120|PAI2_HUMAN	345.2	46596	18	57	Plasminogen activator inhibitor 2 OS=Homo sapiens OX=9606 GN=SERPINB2 PE=1 SV=2	P05120		PAI2	6697.7	6299.45	6918.65	6117.35	5514.75	6276.95
211	675	O75083|WDR1_HUMAN	390.13	66194	17	50	WD repeat-containing protein 1 OS=Homo sapiens OX=9606 GN=WDR1 PE=1 SV=4	O75083		WDR1	5453.95	7473.4	6165.6	6182.75	5768.95	6452.6
335	6128	P05387|RLA2_HUMAN	291.16	11665	7	74	60S acidic ribosomal protein P2 OS=Homo sapiens OX=9606 GN=RPLP2 PE=1 SV=1	P05387		RLA2	4749.55	5065.05	5351.25	6560.3	6450.6	6451.15
268	500	O43143|DHX15_HUMAN	377.88	90933	24	39	Pre-mRNA-splicing factor ATP-dependent RNA helicase DHX15 OS=Homo sapiens OX=9606 GN=DHX15 PE=1 SV=2	O43143		DHX15	5329.95	6163.05	5595.7	6966.7	5956.85	6510
715	16688	P63173|RL38_HUMAN	157.17	8218	3	36	60S ribosomal protein L38 OS=Homo sapiens OX=9606 GN=RPL38 PE=1 SV=2	P63173		RL38	5799.8	5854.6	6236.05	6493.95	6359.95	6408.2
100	60	Q86UP2|KTN1_HUMAN	459.74	156275	61	51	Kinectin OS=Homo sapiens OX=9606 GN=KTN1 PE=1 SV=1	Q86UP2		KTN1	5040.65	4081.2	5367.7	6375.8	6050.05	6363.8
84	147	O75643|U520_HUMAN	464	244505	63	41	U5 small nuclear ribonucleoprotein 200 kDa helicase OS=Homo sapiens OX=9606 GN=SNRNP200 PE=1 SV=2	O75643		U520	5211.8	5840.9	5235.85	6867.35	6269.9	6373.85
116	404	P05455|LA_HUMAN	400.76	46837	28	62	Lupus La protein OS=Homo sapiens OX=9606 GN=SSB PE=1 SV=2	P05455		LA	4949.35	5370.3	4100	6058.85	6202.8	6355.8
156	170	P06737-2|PYGL_HUMAN	382.81	93134	27	50	Isoform 2 of Glycogen phosphorylase liver form OS=Homo sapiens OX=9606 GN=PYGL	P06737	2	PYGL	3898.85	3417	3389.3	4689.3	3906.65	5466.1
377	4329	Q15185-4|TEBP_HUMAN	273.29	16476	7	54	Isoform 4 of Prostaglandin E synthase 3 OS=Homo sapiens OX=9606 GN=PTGES3	Q15185	4	TEBP	6521.75	6732.55	6099.15	7144.45	6682	6620.95
158	408	P49368|TCPG_HUMAN	377.66	60534	26	49	T-complex protein 1 subunit gamma OS=Homo sapiens OX=9606 GN=CCT3 PE=1 SV=4	P49368		TCPG	9125.85	9017	6477.05	7417.15	8692.85	7036
185	623	P30153|2AAA_HUMAN	393.98	65309	15	50	Serine/threonine-protein phosphatase 2A 65 kDa regulatory subunit A alpha isoform OS=Homo sapiens OX=9606 GN=PPP2R1A PE=1 SV=4	P30153		2AAA	5608.55	5008.9	4793.85	5447.35	5944.9	5961.6
133	2071	P62826|RAN_HUMAN	343.92	24423	15	53	GTP-binding nuclear protein Ran OS=Homo sapiens OX=9606 GN=RAN PE=1 SV=3	P62826		RAN	11584.5	6872.9	6438.15	6594.05	6868.9	6399.3
304	2106	Q9NZ01|TECR_HUMAN	298.7	36034	13	34	Very-long-chain enoyl-CoA reductase OS=Homo sapiens OX=9606 GN=TECR PE=1 SV=1	Q9NZ01		TECR	4279.95	4921.3	4302.95	5924.05	4981.75	5977.95
322	1993	P10768|ESTD_HUMAN	339.17	31463	13	82	S-formylglutathione hydrolase OS=Homo sapiens OX=9606 GN=ESD PE=1 SV=2	P10768		ESTD	6645.7	10818.5	7935.65	8978.7	5980.6	6174.85
534	373	Q8IVF2-3|AHNK2_HUMAN	389.79	605660	38	10	Isoform 3 of Protein AHNAK2 OS=Homo sapiens OX=9606 GN=AHNAK2	Q8IVF2	3	AHNK2	1128.4	717.86	1204.3	820.77	2876.8	3653.75
381	167	O00571|DDX3X_HUMAN	389.44	73244	24	44	ATP-dependent RNA helicase DDX3X OS=Homo sapiens OX=9606 GN=DDX3X PE=1 SV=3	O00571		DDX3X	5392.65	4422.6	4978.3	4912.9	5364.1	6003.75
265	747	Q96HE7|ERO1A_HUMAN	322.55	54393	17	52	ERO1-like protein alpha OS=Homo sapiens OX=9606 GN=ERO1A PE=1 SV=2	Q96HE7		ERO1A	3986.55	5051.85	5126.65	5531.75	4791.2	5781.35
253	1390	P15559-2|NQO1_HUMAN	352.63	27295	17	55	Isoform 2 of NAD(P)H dehydrogenase [quinone] 1 OS=Homo sapiens OX=9606 GN=NQO1	P15559	2	NQO1	6747.25	6583.2	8767	7997.55	8484.15	7083.55
388	2850	Q53GQ0|DHB12_HUMAN	316.14	34324	13	46	Very-long-chain 3-oxoacyl-CoA reductase OS=Homo sapiens OX=9606 GN=HSD17B12 PE=1 SV=2	Q53GQ0		DHB12	5923.65	5506.85	5456.4	4578.6	5491.55	5360.05
195	341	P05023-4|AT1A1_HUMAN	390.29	113000	32	34	Isoform 4 of Sodium/potassium-transporting ATPase subunit alpha-1 OS=Homo sapiens OX=9606 GN=ATP1A1	P05023	4	AT1A1	4054.5	4623.15	4980.35	5323.65	7037.75	5794.45
177	1162	P27695|APEX1_HUMAN	392.2	35555	22	71	DNA-(apurinic or apyrimidinic site) endonuclease OS=Homo sapiens OX=9606 GN=APEX1 PE=1 SV=2	P27695		APEX1	4630.15	4465.65	4901.45	4589.45	5470.2	5685.4
183	85	P40227|TCPZ_HUMAN	390.59	58024	22	66	T-complex protein 1 subunit zeta OS=Homo sapiens OX=9606 GN=CCT6A PE=1 SV=3	P40227		TCPZ	9426.5	9324.85	9100.3	6863.4	9975.7	7019
245	141	P41250|GARS_HUMAN	370.97	83166	25	47	Glycine--tRNA ligase OS=Homo sapiens OX=9606 GN=GARS1 PE=1 SV=3	P41250		GARS	6671.85	6616.05	5696.7	3780.35	3868.9	4838.65
432	3373	P09382|LEG1_HUMAN	252.36	14716	6	72	Galectin-1 OS=Homo sapiens OX=9606 GN=LGALS1 PE=1 SV=2	P09382		LEG1	3426.5	3111.6	3693.65	5004.65	5009.25	5537.4
224	771	P12268|IMDH2_HUMAN	397.75	55805	19	46	Inosine-5'-monophosphate dehydrogenase 2 OS=Homo sapiens OX=9606 GN=IMPDH2 PE=1 SV=2	P12268		IMDH2	12816	6102	5861.4	5538.05	13851	5800.1
91	401	P58107|EPIPL_HUMAN	483.15	555666	68	22	Epiplakin OS=Homo sapiens OX=9606 GN=EPPK1 PE=1 SV=3	P58107		EPIPL	8604.4	7644.75	8381.85	6901.4	6658.35	6169.05
103	1043	Q04828|AK1C1_HUMAN	389.07	36788	2	68	Aldo-keto reductase family 1 member C1 OS=Homo sapiens OX=9606 GN=AKR1C1 PE=1 SV=1	Q04828		AK1C1	5047.75	4679.1	5637.3	5681.6	5691.15	5702.4
271	3237	O95994|AGR2_HUMAN	341.37	19979	11	62	Anterior gradient protein 2 homolog OS=Homo sapiens OX=9606 GN=AGR2 PE=1 SV=1	O95994		AGR2	10557.8	11119.5	10511.9	5144.3	5050.9	5440.75
505	3153	P62277|RS13_HUMAN	252.79	17222	9	49	40S ribosomal protein S13 OS=Homo sapiens OX=9606 GN=RPS13 PE=1 SV=2	P62277		RS13	5188.2	4881.75	4353.95	4667.25	5381.65	5501
170	268	P22314-2|UBA1_HUMAN	404.85	113800	30	49	Isoform 2 of Ubiquitin-like modifier-activating enzyme 1 OS=Homo sapiens OX=9606 GN=UBA1	P22314	2	UBA1	6981.25	7419.65	7198.1	6887.85	6687.2	6147.7
398	1828	O60218|AK1BA_HUMAN	317.49	36020	11	55	Aldo-keto reductase family 1 member B10 OS=Homo sapiens OX=9606 GN=AKR1B10 PE=1 SV=2	O60218		AK1BA	5421.75	4585.55	4764.2	4366.85	4896.1	5511.1
290	3007	P62906|RL10A_HUMAN	298.52	24831	10	40	60S ribosomal protein L10a OS=Homo sapiens OX=9606 GN=RPL10A PE=1 SV=2	P62906		RL10A	6686.05	6290.25	6403.15	7320.25	6872.3	6410.4
118	700	P50395|GDIB_HUMAN	447.78	50663	19	57	Rab GDP dissociation inhibitor beta OS=Homo sapiens OX=9606 GN=GDI2 PE=1 SV=2	P50395		GDIB	5224.4	6210.6	5665.45	6381.85	6566.95	5950.1
206	1724	P05388|RLA0_HUMAN	344.96	34274	15	55	60S acidic ribosomal protein P0 OS=Homo sapiens OX=9606 GN=RPLP0 PE=1 SV=1	P05388		RLA0	5696.85	6574.65	5704.3	4615.7	5205.2	5322.35
167	558	Q01518|CAP1_HUMAN	373.41	51902	26	54	Adenylyl cyclase-associated protein 1 OS=Homo sapiens OX=9606 GN=CAP1 PE=1 SV=5	Q01518		CAP1	8176.4	9028.1	9867	8522	8769.9	6970.55
221	756	Q9UQ80|PA2G4_HUMAN	393.04	43787	18	64	Proliferation-associated protein 2G4 OS=Homo sapiens OX=9606 GN=PA2G4 PE=1 SV=3	Q9UQ80		PA2G4	6393.95	6846.95	6249.2	6404.6	6859.15	5763.5
239	366	O60610-2|DIAP1_HUMAN	370.23	138907	28	24	Isoform 2 of Protein diaphanous homolog 1 OS=Homo sapiens OX=9606 GN=DIAPH1	O60610	2	DIAP1	5735.65	4793.95	4587.75	4452.2	4600	5011.6
262	1362	P47756-2|CAPZB_HUMAN	333.03	30629	16	62	Isoform 2 of F-actin-capping protein subunit beta OS=Homo sapiens OX=9606 GN=CAPZB	P47756	2	CAPZB	5503	5980.95	5861.5	5366.9	5442.35	5465.45
120	286	Q92616|GCN1_HUMAN	433.97	292756	51	29	eIF-2-alpha kinase activator GCN1 OS=Homo sapiens OX=9606 GN=GCN1 PE=1 SV=6	Q92616		GCN1	4193.15	5227.35	4430.6	5004.85	4741	5331.8
436	5600	P62841|RS15_HUMAN	237.64	17040	5	52	40S ribosomal protein S15 OS=Homo sapiens OX=9606 GN=RPS15 PE=1 SV=2	P62841		RS15	5366.5	6206.9	5318.35	4384.2	5182.1	5386.6
272	699	P63244|RACK1_HUMAN	321.11	35077	15	79	Receptor of activated protein C kinase 1 OS=Homo sapiens OX=9606 GN=RACK1 PE=1 SV=3	P63244		RACK1	7672.65	11314.5	8701.25	9199.95	7258.45	6337.3
230	949	P07910-2|HNRPC_HUMAN	303.36	32338	18	53	Isoform C1 of Heterogeneous nuclear ribonucleoproteins C1/C2 OS=Homo sapiens OX=9606 GN=HNRNPC	P07910	2	HNRPC	5878.4	5876.85	7277.4	8032.6	5306.75	6130.05
182	582	P35222|CTNB1_HUMAN	360.14	85497	18	39	Catenin beta-1 OS=Homo sapiens OX=9606 GN=CTNNB1 PE=1 SV=1	P35222		CTNB1	3364.55	3432.2	3586.5	4227.25	3675.75	4639.5
725	2390	P28074|PSB5_HUMAN	263.59	28480	8	45	Proteasome subunit beta type-5 OS=Homo sapiens OX=9606 GN=PSMB5 PE=1 SV=3	P28074		PSB5	4456.05	4540.1	4602.25	4965.3	4109.3	5021.15
794	4293	P62910|RL32_HUMAN	263.14	15860	8	44	60S ribosomal protein L32 OS=Homo sapiens OX=9606 GN=RPL32 PE=1 SV=2	P62910		RL32	5181.55	5667.1	5549.8	5193.15	5323.7	5203.35
526	2110	P30084|ECHM_HUMAN	292.14	31387	11	52	Enoyl-CoA hydratase mitochondrial OS=Homo sapiens OX=9606 GN=ECHS1 PE=1 SV=4	P30084		ECHM	3282.45	3423.65	3725	4800.85	4793.55	5053.95
134	417	O60506|HNRPQ_HUMAN	420.23	69603	23	52	Heterogeneous nuclear ribonucleoprotein Q OS=Homo sapiens OX=9606 GN=SYNCRIP PE=1 SV=2	O60506		HNRPQ	5306.45	3357.95	4037.2	4833.4	4567.15	5040.4
705	2845	Q99623|PHB2_HUMAN	258.71	33296	10	43	Prohibitin-2 OS=Homo sapiens OX=9606 GN=PHB2 PE=1 SV=2	Q99623		PHB2	2672.85	2011.4	1886.6	3560.65	4101.95	4524.85
260	492	Q99798|ACON_HUMAN	365.07	85425	19	46	Aconitate hydratase mitochondrial OS=Homo sapiens OX=9606 GN=ACO2 PE=1 SV=2	Q99798		ACON	3254.2	2541.5	2510.65	3260.8	3806.25	4258.15
623	2030	P51665|PSMD7_HUMAN	276.59	37025	8	48	26S proteasome non-ATPase regulatory subunit 7 OS=Homo sapiens OX=9606 GN=PSMD7 PE=1 SV=2	P51665		PSMD7	4904.25	4266.35	4539.65	4762.65	4462.75	4866.05
540	1658	P52597|HNRPF_HUMAN	300.8	45672	9	49	Heterogeneous nuclear ribonucleoprotein F OS=Homo sapiens OX=9606 GN=HNRNPF PE=1 SV=3	P52597		HNRPF	4014.5	3097.2	3892.2	5215.95	5020.55	5103.95
752	6259	P31949|S10AB_HUMAN	220.15	11740	4	38	Protein S100-A11 OS=Homo sapiens OX=9606 GN=S100A11 PE=1 SV=2	P31949		S10AB	6688.5	10347.9	8507.65	6267.65	4832.05	5021.8
308	1721	Q12905|ILF2_HUMAN	324.38	43062	15	56	Interleukin enhancer-binding factor 2 OS=Homo sapiens OX=9606 GN=ILF2 PE=1 SV=2	Q12905		ILF2	3667.45	4647.9	4039.55	5008.85	4187.35	4914.55
615	2890	P62280|RS11_HUMAN	244.4	18431	9	45	40S ribosomal protein S11 OS=Homo sapiens OX=9606 GN=RPS11 PE=1 SV=3	P62280		RS11	4946.8	5119.8	3813.85	4835.35	4575.85	4943.05
440	2196	Q9UMS4|PRP19_HUMAN	317.09	55181	13	59	Pre-mRNA-processing factor 19 OS=Homo sapiens OX=9606 GN=PRPF19 PE=1 SV=1	Q9UMS4		PRP19	3366	3961.65	4291.15	4682.95	4947.6	4949.1
255	176	Q92598-2|HS105_HUMAN	389.97	92116	32	57	Isoform Beta of Heat shock protein 105 kDa OS=Homo sapiens OX=9606 GN=HSPH1	Q92598	2	HS105	5229.5	4457.25	4394.45	5452.1	4609.85	4971.5
165	140	P53618|COPB_HUMAN	410.19	107142	30	45	Coatomer subunit beta OS=Homo sapiens OX=9606 GN=COPB1 PE=1 SV=3	P53618		COPB	5455.55	5299.55	5434.05	5362	4809.4	5001.95
207	431	P43243|MATR3_HUMAN	379.35	94623	27	38	Matrin-3 OS=Homo sapiens OX=9606 GN=MATR3 PE=1 SV=2	P43243		MATR3	3501.25	3381.1	3423	5191.8	4650.65	4963.35
391	1106	P08758|ANXA5_HUMAN	301.64	35937	16	56	Annexin A5 OS=Homo sapiens OX=9606 GN=ANXA5 PE=1 SV=2	P08758		ANXA5	7891.35	6627.8	6874.65	3408.75	3629.15	4242.5
163	38	P23381|SYWC_HUMAN	410.5	53165	29	77	Tryptophan--tRNA ligase cytoplasmic OS=Homo sapiens OX=9606 GN=WARS1 PE=1 SV=2	P23381		SYWC	18696.5	20222	19820.5	5230.35	4965.95	5067.6
394	3282	P24539|AT5F1_HUMAN	324.01	28909	13	33	ATP synthase F(0) complex subunit B1 mitochondrial OS=Homo sapiens OX=9606 GN=ATP5PB PE=1 SV=2	P24539		AT5F1	3742.1	3938.4	3443.3	4454.35	4831.8	4771.6
359	2222	P30044|PRDX5_HUMAN	282.93	22086	11	66	Peroxiredoxin-5 mitochondrial OS=Homo sapiens OX=9606 GN=PRDX5 PE=1 SV=4	P30044		PRDX5	4948.3	4293.6	4696.75	3824.85	5114.8	4899.2
433	1586	P78417|GSTO1_HUMAN	293.13	27566	16	55	Glutathione S-transferase omega-1 OS=Homo sapiens OX=9606 GN=GSTO1 PE=1 SV=2	P78417		GSTO1	5172.95	5032.45	4849.95	4773.45	5264.45	4901.3
481	2646	Q7L2H7|EIF3M_HUMAN	315.5	42503	13	35	Eukaryotic translation initiation factor 3 subunit M OS=Homo sapiens OX=9606 GN=EIF3M PE=1 SV=1	Q7L2H7		EIF3M	4602.9	3996.85	4752.45	4878.45	4935.35	4889.3
125	181	Q9P2E9|RRBP1_HUMAN	446.05	152456	42	36	Ribosome-binding protein 1 OS=Homo sapiens OX=9606 GN=RRBP1 PE=1 SV=5	Q9P2E9		RRBP1	6962.9	6719.15	7074.65	4433.7	4894.6	4641.65
252	596	P17987|TCPA_HUMAN	356.87	60344	21	52	T-complex protein 1 subunit alpha OS=Homo sapiens OX=9606 GN=TCP1 PE=1 SV=1	P17987		TCPA	5468.7	5426.6	5496.2	4995.05	5387.1	5038.35
337	490	Q15008|PSMD6_HUMAN	338.42	45531	21	52	26S proteasome non-ATPase regulatory subunit 6 OS=Homo sapiens OX=9606 GN=PSMD6 PE=1 SV=1	Q15008		PSMD6	4417.15	3587.75	3687.85	3893.7	4724.75	4548.75
258	824	Q96TA1-2|NIBA2_HUMAN	332.8	82683	18	37	Isoform 2 of Protein Niban 2 OS=Homo sapiens OX=9606 GN=NIBAN2	Q96TA1	2	NIBA2	2804.05	3467.1	3124.9	3980.45	4015.65	4538.45
946	6452	P29034|S10A2_HUMAN	209.12	11117	5	37	Protein S100-A2 OS=Homo sapiens OX=9606 GN=S100A2 PE=1 SV=3	P29034		S10A2	6732.05	5091.7	3565.8	4506.9	5227.5	4769.8
751	4866	Q9NQC3-2|RTN4_HUMAN	237.72	40318	6	27	Isoform B of Reticulon-4 OS=Homo sapiens OX=9606 GN=RTN4	Q9NQC3	2	RTN4	4487.7	5244.65	3958.75	3753.4	4177.1	4469.25
123	306	Q14839|CHD4_HUMAN	419.6	218003	40	32	Chromodomain-helicase-DNA-binding protein 4 OS=Homo sapiens OX=9606 GN=CHD4 PE=1 SV=2	Q14839		CHD4	2880.15	2438.7	3006.95	4107.5	3898.95	4419.1
387	1858	P51572-2|BAP31_HUMAN	288.78	34752	14	44	Isoform 2 of B-cell receptor-associated protein 31 OS=Homo sapiens OX=9606 GN=BCAP31	P51572	2	BAP31	7195.4	6648.8	4439.9	4623.6	5809.75	4736.35
190	311	O75533|SF3B1_HUMAN	423.01	145830	40	44	Splicing factor 3B subunit 1 OS=Homo sapiens OX=9606 GN=SF3B1 PE=1 SV=3	O75533		SF3B1	3375.55	3379.45	3681.85	4280.6	3580.4	4406.9
450	2184	Q00796|DHSO_HUMAN	316.14	38325	11	48	Sorbitol dehydrogenase OS=Homo sapiens OX=9606 GN=SORD PE=1 SV=4	Q00796		DHSO	3150.55	2523.15	2386.85	2931	2501.65	3785.4
332	3582	Q92597|NDRG1_HUMAN	337.03	42835	10	43	Protein NDRG1 OS=Homo sapiens OX=9606 GN=NDRG1 PE=1 SV=1	Q92597		NDRG1	7285.3	8362.9	8078.75	5314.5	5381.7	4981.5
187	744	Q13838|DX39B_HUMAN	394.82	48991	15	58	Spliceosome RNA helicase DDX39B OS=Homo sapiens OX=9606 GN=DDX39B PE=1 SV=1	Q13838		DX39B	4622.65	4551.05	4010.65	4169.7	3445.2	4257.85
338	1455	P61158|ARP3_HUMAN	324.69	47371	14	55	Actin-related protein 3 OS=Homo sapiens OX=9606 GN=ACTR3 PE=1 SV=3	P61158		ARP3	4893.5	4161.15	3938	3941.55	4866.6	4606.7
499	2190	P61326|MGN_HUMAN	291.25	17164	10	82	Protein mago nashi homolog OS=Homo sapiens OX=9606 GN=MAGOH PE=1 SV=1	P61326		MGN	3624.9	3594.65	3813.95	4037.15	4038.05	4307.75
463	710	P11940-2|PABP1_HUMAN	334.02	61181	13	41	Isoform 2 of Polyadenylate-binding protein 1 OS=Homo sapiens OX=9606 GN=PABPC1	P11940	2	PABP1	2926.05	4908.8	4034.8	5183.5	5091.5	4702.95
325	1303	P34897-3|GLYM_HUMAN	326.15	53455	14	51	Isoform 3 of Serine hydroxymethyltransferase mitochondrial OS=Homo sapiens OX=9606 GN=SHMT2	P34897	3	GLYM	6592.9	8254.35	3174.6	3998.45	3328.45	4031
250	218	P53396|ACLY_HUMAN	372.01	120839	28	41	ATP-citrate synthase OS=Homo sapiens OX=9606 GN=ACLY PE=1 SV=3	P53396		ACLY	3520.05	4074.6	3770.25	4730.7	5464	4762.4
203	415	P49915|GUAA_HUMAN	404.86	76716	29	49	GMP synthase [glutamine-hydrolyzing] OS=Homo sapiens OX=9606 GN=GMPS PE=1 SV=1	P49915		GUAA	3717.2	2896.75	3242.8	4581.55	4132.4	4442
466	1031	O75874|IDHC_HUMAN	320.57	46659	14	50	Isocitrate dehydrogenase [NADP] cytoplasmic OS=Homo sapiens OX=9606 GN=IDH1 PE=1 SV=2	O75874		IDHC	4383.45	4712.4	4355.25	4702.6	3814.65	4483.45
201	1712	P31946|1433B_HUMAN	307.37	28082	5	52	14-3-3 protein beta/alpha OS=Homo sapiens OX=9606 GN=YWHAB PE=1 SV=3	P31946		1433B	3929.3	4622.3	4540.65	4141.55	4175.3	4247.85
146	316	P41252|SYIC_HUMAN	401.11	144498	40	37	Isoleucine--tRNA ligase cytoplasmic OS=Homo sapiens OX=9606 GN=IARS1 PE=1 SV=2	P41252		SYIC	5198.55	6641.85	5217.8	5305.45	5744.65	4801.4
411	1318	P52209-2|6PGD_HUMAN	340.27	51872	15	46	Isoform 2 of 6-phosphogluconate dehydrogenase decarboxylating OS=Homo sapiens OX=9606 GN=PGD	P52209	2	6PGD	4187.5	3230.3	3204.75	3673.6	4398.45	4186.4
574	1342	P14314-2|GLU2B_HUMAN	290.43	59178	17	42	Isoform 2 of Glucosidase 2 subunit beta OS=Homo sapiens OX=9606 GN=PRKCSH	P14314	2	GLU2B	4942.55	2340.38	3612	5338.2	3101.4	4222
353	485	Q15046|SYK_HUMAN	328	68048	22	47	Lysine--tRNA ligase OS=Homo sapiens OX=9606 GN=KARS1 PE=1 SV=3	Q15046		SYK	4917.75	4577.55	4261.85	4050.45	4256.55	4220.75
686	3767	P32969|RL9_HUMAN	261.03	21863	9	62	60S ribosomal protein L9 OS=Homo sapiens OX=9606 GN=RPL9 PE=1 SV=1	P32969		RL9	4547.6	4836.8	4680.55	3240	3641.4	3829.95
149	1442	P22392-2|NDKB_HUMAN	365.21	30137	3	56	Isoform 3 of Nucleoside diphosphate kinase B OS=Homo sapiens OX=9606 GN=NME2	P22392	2	NDKB	5362.2	3186.85	3715.6	3478.6	3929.2	4055.05
1051	6793	P62854|RS26_HUMAN	169.46	13015	4	43	40S ribosomal protein S26 OS=Homo sapiens OX=9606 GN=RPS26 PE=1 SV=3	P62854		RS26	4182.25	3606.1	2955.15	3974.1	4149.5	4111.45
486	3110	Q96FW1|OTUB1_HUMAN	287.88	31284	8	36	Ubiquitin thioesterase OTUB1 OS=Homo sapiens OX=9606 GN=OTUB1 PE=1 SV=2	Q96FW1		OTUB1	2626.25	2230.3	2921.85	4298.9	3441.55	4216.5
662	2108	P16401|H15_HUMAN	272.48	22580	11	38	Histone H1.5 OS=Homo sapiens OX=9606 GN=H1-5 PE=1 SV=3	P16401		H15	4472.35	2991.3	3685.95	3511.7	3695.05	4100.3
502	1521	Q9HDC9|APMAP_HUMAN	313.99	46480	12	39	Adipocyte plasma membrane-associated protein OS=Homo sapiens OX=9606 GN=APMAP PE=1 SV=2	Q9HDC9		APMAP	3369.35	3637.3	3773.1	3688.95	3919.25	4020
559	2341	P23284|PPIB_HUMAN	289.5	23743	13	53	Peptidyl-prolyl cis-trans isomerase B OS=Homo sapiens OX=9606 GN=PPIB PE=1 SV=2	P23284		PPIB	5490.4	4559.3	5299.8	4719.4	4712.2	4312.45
222	994	P17655|CAN2_HUMAN	339.3	79995	20	45	Calpain-2 catalytic subunit OS=Homo sapiens OX=9606 GN=CAPN2 PE=1 SV=6	P17655		CAN2	4250.85	4056.85	3533.1	3595.85	3482.9	3919
261	189	Q15029|U5S1_HUMAN	400.37	109436	27	41	116 kDa U5 small nuclear ribonucleoprotein component OS=Homo sapiens OX=9606 GN=EFTUD2 PE=1 SV=1	Q15029		U5S1	3209.1	3065.55	2406.35	3579.95	3143.85	3679.25
331	525	P35606-2|COPB2_HUMAN	351.85	99046	24	42	Isoform 2 of Coatomer subunit beta' OS=Homo sapiens OX=9606 GN=COPB2	P35606	2	COPB2	4928.9	4857.85	4770.15	3544.6	3909.95	4075.1
661	3324	P49720|PSB3_HUMAN	266.54	22949	9	42	Proteasome subunit beta type-3 OS=Homo sapiens OX=9606 GN=PSMB3 PE=1 SV=2	P49720		PSB3	3382.55	3871.9	3022.1	4641.3	4148.2	4101.75
236	211	P18206-2|VINC_HUMAN	391.81	116722	34	45	Isoform 1 of Vinculin OS=Homo sapiens OX=9606 GN=VCL	P18206	2	VINC	4692.4	4393.4	3775.8	3678.05	3256.2	3853.25
801	5164	Q15363|TMED2_HUMAN	240.48	22761	9	35	Transmembrane emp24 domain-containing protein 2 OS=Homo sapiens OX=9606 GN=TMED2 PE=1 SV=1	Q15363		TMED2	3833.4	3345.65	3843.45	3734.55	4003.85	4003.35
301	380	Q16531|DDB1_HUMAN	358.58	126968	24	27	DNA damage-binding protein 1 OS=Homo sapiens OX=9606 GN=DDB1 PE=1 SV=1	Q16531		DDB1	2928.25	3848.75	4426.55	4657.25	4453	4170.4
278	958	Q9NTK5|OLA1_HUMAN	410.2	44744	20	69	Obg-like ATPase 1 OS=Homo sapiens OX=9606 GN=OLA1 PE=1 SV=2	Q9NTK5		OLA1	3987.65	4195.65	3630.25	4765.35	4291	4188.7
523	5359	P52565|GDIR1_HUMAN	229.96	23207	6	35	Rho GDP-dissociation inhibitor 1 OS=Homo sapiens OX=9606 GN=ARHGDIA PE=1 SV=3	P52565		GDIR1	4286.85	4653.3	4075	4362.05	4171.1	4067.4
747	3526	P25398|RS12_HUMAN	237.23	14515	7	58	40S ribosomal protein S12 OS=Homo sapiens OX=9606 GN=RPS12 PE=1 SV=3	P25398		RS12	4599	4058.25	4289.45	3942.8	4202.75	4018.8
461	1403	P26583|HMGB2_HUMAN	308.34	24034	14	59	High mobility group protein B2 OS=Homo sapiens OX=9606 GN=HMGB2 PE=1 SV=2	P26583		HMGB2	3200.2	2664.55	2759.75	3348	3523.3	3887.4
241	990	Q9P258|RCC2_HUMAN	356.16	56085	17	50	Protein RCC2 OS=Homo sapiens OX=9606 GN=RCC2 PE=1 SV=2	Q9P258		RCC2	3994.3	5299.35	4894.2	5418.2	4375.8	4287.6
238	18	P52272-2|HNRPM_HUMAN	392.98	73621	26	51	Isoform 2 of Heterogeneous nuclear ribonucleoprotein M OS=Homo sapiens OX=9606 GN=HNRNPM	P52272	2	HNRPM	4690.7	3644.3	3263.15	3980.3	4269.5	3970.5
330	407	P20700|LMNB1_HUMAN	347.44	66408	23	52	Lamin-B1 OS=Homo sapiens OX=9606 GN=LMNB1 PE=1 SV=2	P20700		LMNB1	4408.9	4014.45	4840.9	4325.35	3772.4	3967.1
287	541	Q14974|IMB1_HUMAN	354.4	97170	24	40	Importin subunit beta-1 OS=Homo sapiens OX=9606 GN=KPNB1 PE=1 SV=2	Q14974		IMB1	4735.3	4272.1	4711.6	4559.4	4058.8	3966.2
334	427	P33993|MCM7_HUMAN	329.56	81308	22	43	DNA replication licensing factor MCM7 OS=Homo sapiens OX=9606 GN=MCM7 PE=1 SV=4	P33993		MCM7	2672.45	2572.05	2410.1	3197	3608.4	3662.05
225	143	P23588|IF4B_HUMAN	362.71	69151	25	44	Eukaryotic translation initiation factor 4B OS=Homo sapiens OX=9606 GN=EIF4B PE=1 SV=2	P23588		IF4B	4888.8	5341	5690.25	5451.6	3128.2	4009.95
218	41	P33176|KINH_HUMAN	384.43	109685	35	45	Kinesin-1 heavy chain OS=Homo sapiens OX=9606 GN=KIF5B PE=1 SV=1	P33176		KINH	3717.2	3349.25	3848.65	4310	3402.7	3874
174	253	P12270|TPR_HUMAN	438.39	267290	56	30	Nucleoprotein TPR OS=Homo sapiens OX=9606 GN=TPR PE=1 SV=3	P12270		TPR	2897	2859.55	2901.6	3684.65	3141.4	3594.4
546	14224	Q9UII2|ATIF1_HUMAN	172.62	12249	4	11	ATPase inhibitor mitochondrial OS=Homo sapiens OX=9606 GN=ATP5IF1 PE=1 SV=1	Q9UII2		ATIF1	3597.55	4512.6	3928.45	6643.75	4262.6	4665.5
926	3832	P14324|FPPS_HUMAN	270.41	48276	9	35	Farnesyl pyrophosphate synthase OS=Homo sapiens OX=9606 GN=FDPS PE=1 SV=4	P14324		FPPS	2376	2841.05	3154.25	2250.7	3100.2	3365.75
603	4566	Q96FQ6|S10AG_HUMAN	243.81	11801	7	68	Protein S100-A16 OS=Homo sapiens OX=9606 GN=S100A16 PE=1 SV=1	Q96FQ6		S10AG	3945.85	4220.25	4531.85	4047.4	4287.2	3899.9
339	1464	Q16543|CDC37_HUMAN	343.71	44468	17	38	Hsp90 co-chaperone Cdc37 OS=Homo sapiens OX=9606 GN=CDC37 PE=1 SV=1	Q16543		CDC37	4469.75	4380.75	3933.15	3475.95	3748.8	3728.5
399	2358	P06748|NPM_HUMAN	350.57	32575	15	53	Nucleophosmin OS=Homo sapiens OX=9606 GN=NPM1 PE=1 SV=2	P06748		NPM	8209.9	7995.7	8134.8	3772.6	3949.5	3870.1
247	764	O95373|IPO7_HUMAN	349.61	119516	21	23	Importin-7 OS=Homo sapiens OX=9606 GN=IPO7 PE=1 SV=1	O95373		IPO7	4211.6	3697.35	3921.35	4217.45	4011.35	3988.6
456	1376	P55010|IF5_HUMAN	347.04	49223	17	37	Eukaryotic translation initiation factor 5 OS=Homo sapiens OX=9606 GN=EIF5 PE=1 SV=2	P55010		IF5	3568.7	2483.55	2495.65	2632.55	2389.9	3503.2
348	1868	Q15691|MARE1_HUMAN	304.49	29999	14	78	Microtubule-associated protein RP/EB family member 1 OS=Homo sapiens OX=9606 GN=MAPRE1 PE=1 SV=3	Q15691		MARE1	4157.5	4152.7	4558.4	3409.1	3648.45	3656.3
451	757	Q16181|SEPT7_HUMAN	327.25	50680	14	48	Septin-7 OS=Homo sapiens OX=9606 GN=SEPTIN7 PE=1 SV=2	Q16181		2007-09-01	3179.25	3398.25	3478.15	3464.25	3441.75	3678.3
352	571	Q01813|PFKAP_HUMAN	365.52	85596	23	44	ATP-dependent 6-phosphofructokinase platelet type OS=Homo sapiens OX=9606 GN=PFKP PE=1 SV=2	Q01813		PFKAP	4269.2	4726.25	4334.85	3981.5	3253.45	3798.8
587	4164	P61353|RL27_HUMAN	244.77	15798	7	43	60S ribosomal protein L27 OS=Homo sapiens OX=9606 GN=RPL27 PE=1 SV=2	P61353		RL27	3931.45	3854.05	3988.15	3513.05	3364.45	3786.2
783	2671	P25788-2|PSA3_HUMAN	230.51	27647	9	35	Isoform 2 of Proteasome subunit alpha type-3 OS=Homo sapiens OX=9606 GN=PSMA3	P25788	2	PSA3	3808	3972.75	3457.7	4553.15	3185.8	3815.9
286	378	Q86VP6|CAND1_HUMAN	362.41	136375	30	34	Cullin-associated NEDD8-dissociated protein 1 OS=Homo sapiens OX=9606 GN=CAND1 PE=1 SV=2	Q86VP6		CAND1	2932.65	2931.55	3118.4	3737.65	3454.05	3772.15
213	42	P50990|TCPQ_HUMAN	377.08	59621	29	62	T-complex protein 1 subunit theta OS=Homo sapiens OX=9606 GN=CCT8 PE=1 SV=4	P50990		TCPQ	5873.7	6358.05	5955.35	4817.85	6048.35	4532.6
609	1603	O14908|GIPC1_HUMAN	293.2	36049	13	57	PDZ domain-containing protein GIPC1 OS=Homo sapiens OX=9606 GN=GIPC1 PE=1 SV=2	O14908		GIPC1	1404.25	1272.47	1469.45	2714.6	2133.05	2989.5
931	3935	P62241|RS8_HUMAN	236.4	24205	9	51	40S ribosomal protein S8 OS=Homo sapiens OX=9606 GN=RPS8 PE=1 SV=2	P62241		RS8	3543.95	3593.35	3482.3	3884.65	4244.6	3841.55
850	3834	Q07020|RL18_HUMAN	204.66	21634	6	34	60S ribosomal protein L18 OS=Homo sapiens OX=9606 GN=RPL18 PE=1 SV=2	Q07020		RL18	3780.8	3524.65	3338	3849.5	3991.6	3847.35
554	870	P49321|NASP_HUMAN	333.68	85238	14	39	Nuclear autoantigenic sperm protein OS=Homo sapiens OX=9606 GN=NASP PE=1 SV=2	P49321		NASP	3055.65	2758.3	2135.5	4035.3	3896.95	3861.25
315	656	O60763|USO1_HUMAN	362.01	107895	18	29	General vesicular transport factor p115 OS=Homo sapiens OX=9606 GN=USO1 PE=1 SV=2	O60763		USO1	4003	4324.1	4612.75	3738.8	3425.7	3668.55
807	3933	P46782|RS5_HUMAN	204.28	22876	9	38	40S ribosomal protein S5 OS=Homo sapiens OX=9606 GN=RPS5 PE=1 SV=4	P46782		RS5	3002.15	1974.3	2324.75	3799.75	2543.9	3536.5
314	163	P11586|C1TC_HUMAN	361.37	101559	33	59	C-1-tetrahydrofolate synthase cytoplasmic OS=Homo sapiens OX=9606 GN=MTHFD1 PE=1 SV=3	P11586		C1TC	2936.2	3335.55	3144.75	2842	3190.8	3671.2
910	5372	P58546|MTPN_HUMAN	277.28	12895	6	72	Myotrophin OS=Homo sapiens OX=9606 GN=MTPN PE=1 SV=2	P58546		MTPN	2456.65	2495	2600.05	2739.65	3656.6	3664.7
638	1631	Q13148|TADBP_HUMAN	279.13	44740	11	46	TAR DNA-binding protein 43 OS=Homo sapiens OX=9606 GN=TARDBP PE=1 SV=1	Q13148		TADBP	2815.45	2251.15	2316.1	3410.3	2757.6	3414.3
616	4145	P60900|PSA6_HUMAN	245.41	27399	7	28	Proteasome subunit alpha type-6 OS=Homo sapiens OX=9606 GN=PSMA6 PE=1 SV=1	P60900		PSA6	3227.4	3304.45	3488.65	2995.15	3402.2	3436.35
77	940	P67936|TPM4_HUMAN	393.74	28522	6	72	Tropomyosin alpha-4 chain OS=Homo sapiens OX=9606 GN=TPM4 PE=1 SV=3	P67936		TPM4	2705.8	2458.5	2805.95	3394.55	3384.8	3536.55
191	35	P34932|HSP74_HUMAN	431.81	94331	36	56	Heat shock 70 kDa protein 4 OS=Homo sapiens OX=9606 GN=HSPA4 PE=1 SV=4	P34932		HSP74	3258.05	4458.8	4021.55	4053.55	3366.35	3627.2
243	1041	P22087|FBRL_HUMAN	337.3	33784	15	61	rRNA 2'-O-methyltransferase fibrillarin OS=Homo sapiens OX=9606 GN=FBL PE=1 SV=2	P22087		FBRL	3413.5	4583.15	4532.15	4209.9	4643.55	3939.2
277	620	P54577|SYYC_HUMAN	369.64	59144	23	52	Tyrosine--tRNA ligase cytoplasmic OS=Homo sapiens OX=9606 GN=YARS1 PE=1 SV=4	P54577		SYYC	4447.8	5060.8	4305.75	3863.35	3072.45	3376.9
336	856	Q96G03|PGM2_HUMAN	342.46	68283	17	42	Phosphoglucomutase-2 OS=Homo sapiens OX=9606 GN=PGM2 PE=1 SV=4	Q96G03		PGM2	2177.4	2016.75	2269.5	2906.65	2745.85	3254.7
274	964	Q9Y446|PKP3_HUMAN	396.59	87082	23	33	Plakophilin-3 OS=Homo sapiens OX=9606 GN=PKP3 PE=1 SV=1	Q9Y446		PKP3	3605.8	2962.4	2678.7	3557.55	3657.95	3590.85
539	3711	P52566|GDIR2_HUMAN	291.47	22988	11	68	Rho GDP-dissociation inhibitor 2 OS=Homo sapiens OX=9606 GN=ARHGDIB PE=1 SV=3	P52566		GDIR2	3128.3	3407.45	3295	3525.65	3133.2	3541.05
200	302	Q6P2Q9|PRP8_HUMAN	402.32	273599	48	30	Pre-mRNA-processing-splicing factor 8 OS=Homo sapiens OX=9606 GN=PRPF8 PE=1 SV=2	Q6P2Q9		PRP8	3093.35	2690.1	2302.95	3043	2778.55	3382.8
555	307	Q5VYK3|ECM29_HUMAN	345.6	204289	25	22	Proteasome adapter and scaffold protein ECM29 OS=Homo sapiens OX=9606 GN=ECPAS PE=1 SV=2	Q5VYK3		ECM29	977.9	614.68	809.35	903.11	974.2	2291.95
478	1644	P62753|RS6_HUMAN	248.06	28681	9	37	40S ribosomal protein S6 OS=Homo sapiens OX=9606 GN=RPS6 PE=1 SV=1	P62753		RS6	4798.85	4210.7	3828	4164.15	2966.3	3540.8
234	172	Q9Y678|COPG1_HUMAN	382.47	97718	34	58	Coatomer subunit gamma-1 OS=Homo sapiens OX=9606 GN=COPG1 PE=1 SV=1	Q9Y678		COPG1	5052.2	4858.85	5549.2	4110.95	3738.9	3718.05
449	770	O95817|BAG3_HUMAN	322.57	61595	17	51	BAG family molecular chaperone regulator 3 OS=Homo sapiens OX=9606 GN=BAG3 PE=1 SV=3	O95817		BAG3	1048.79	1282.25	1267.77	1581.05	1280.18	2550.4
533	1130	P14317|HCLS1_HUMAN	313.94	54014	15	33	Hematopoietic lineage cell-specific protein OS=Homo sapiens OX=9606 GN=HCLS1 PE=1 SV=3	P14317		HCLS1	2481.6	2604.8	2462	2750.7	3993.2	3393.4
579	2913	P00387-3|NB5R3_HUMAN	321.35	38226	11	57	Isoform 3 of NADH-cytochrome b5 reductase 3 OS=Homo sapiens OX=9606 GN=CYB5R3	P00387	3	NB5R3	2250.15	2092.45	2310.6	2800.55	2675.25	3188.7
448	951	Q14134|TRI29_HUMAN	346.01	65835	19	38	Tripartite motif-containing protein 29 OS=Homo sapiens OX=9606 GN=TRIM29 PE=1 SV=2	Q14134		TRI29	3145.9	3180.9	2569.2	3400.4	2858.75	3488.6
799	1834	Q9BZZ5|API5_HUMAN	302.72	59005	12	27	Apoptosis inhibitor 5 OS=Homo sapiens OX=9606 GN=API5 PE=1 SV=3	Q9BZZ5		API5	2512.8	2733.95	3244.8	3086.25	2961.85	3479.5
1343	4462	Q9GZT3-2|SLIRP_HUMAN	207.26	12122	6	58	Isoform 2 of SRA stem-loop-interacting RNA-binding protein mitochondrial OS=Homo sapiens OX=9606 GN=SLIRP	Q9GZT3	2	SLIRP	1135.4	1229.05	1169.9	1420	1370.8	2448.3
263	324	O14980|XPO1_HUMAN	361.07	123386	28	36	Exportin-1 OS=Homo sapiens OX=9606 GN=XPO1 PE=1 SV=1	O14980		XPO1	3307.95	3511.1	2929.05	3260.95	3309.65	3383.9
273	369	Q8WUM4-2|PDC6I_HUMAN	338.77	96772	26	41	Isoform 2 of Programmed cell death 6-interacting protein OS=Homo sapiens OX=9606 GN=PDCD6IP	Q8WUM4	2	PDC6I	3029.55	2781.55	3191.95	3665.2	3085.5	3466.8
199	264	P22102|PUR2_HUMAN	384.13	107767	27	45	Trifunctional purine biosynthetic protein adenosine-3 OS=Homo sapiens OX=9606 GN=GART PE=1 SV=1	P22102		PUR2	3853.55	2865.2	3333.5	3342.2	3234.4	3452.3
487	3055	P55209|NP1L1_HUMAN	306.31	45374	11	46	Nucleosome assembly protein 1-like 1 OS=Homo sapiens OX=9606 GN=NAP1L1 PE=1 SV=1	P55209		NP1L1	3247.25	2737.6	2848.95	2749.6	2949.95	3229.6
294	998	P04844-2|RPN2_HUMAN	378.44	67723	16	44	Isoform 2 of Dolichyl-diphosphooligosaccharide--protein glycosyltransferase subunit 2 OS=Homo sapiens OX=9606 GN=RPN2	P04844	2	RPN2	2013.15	1905.38	2192.85	3016.3	3226.65	3371.45
1277	4272	P62888|RL30_HUMAN	207.53	12784	6	67	60S ribosomal protein L30 OS=Homo sapiens OX=9606 GN=RPL30 PE=1 SV=2	P62888		RL30	3308.6	3613.75	3856.6	3423.65	3381.15	3407.6
797	1606	P22234|PUR6_HUMAN	284.07	47079	13	43	Multifunctional protein ADE2 OS=Homo sapiens OX=9606 GN=PAICS PE=1 SV=3	P22234		PUR6	2652.55	2529.3	2759.8	2152.3	2171.05	2787.5
511	1068	Q99873-2|ANM1_HUMAN	334.9	39929	17	60	Isoform 2 of Protein arginine N-methyltransferase 1 OS=Homo sapiens OX=9606 GN=PRMT1	Q99873	2	ANM1	3598.7	3106.5	3596.65	3189.35	3376.7	3291.25
416	679	P56192|SYMC_HUMAN	329.87	101116	24	32	Methionine--tRNA ligase cytoplasmic OS=Homo sapiens OX=9606 GN=MARS1 PE=1 SV=2	P56192		SYMC	2958.4	2839.95	2604.55	3140.25	3032.7	3327.55
312	539	Q96QK1|VPS35_HUMAN	335.52	91707	20	30	Vacuolar protein sorting-associated protein 35 OS=Homo sapiens OX=9606 GN=VPS35 PE=1 SV=2	Q96QK1		VPS35	3496.7	3393.4	3487.8	3853.15	3684.65	3532.2
372	1381	P61160|ARP2_HUMAN	330.69	44761	15	47	Actin-related protein 2 OS=Homo sapiens OX=9606 GN=ACTR2 PE=1 SV=1	P61160		ARP2	4175.8	4470.45	4118.5	4278	3912.25	3726.9
655	1005	Q09161|NCBP1_HUMAN	297.61	91839	22	43	Nuclear cap-binding protein subunit 1 OS=Homo sapiens OX=9606 GN=NCBP1 PE=1 SV=1	Q09161		NCBP1	2307.8	2094.65	1501.44	2544.5	1993.35	2931.9
427	2443	P35232|PHB_HUMAN	250.78	29804	8	50	Prohibitin OS=Homo sapiens OX=9606 GN=PHB PE=1 SV=1	P35232		PHB	2576.45	3144.6	3099.05	4315.2	4445.35	3763
275	362	P00533|EGFR_HUMAN	361.27	134277	27	32	Epidermal growth factor receptor OS=Homo sapiens OX=9606 GN=EGFR PE=1 SV=2	P00533		EGFR	2381.55	3128.5	2938.05	4175.45	3033.7	3288.3
299	122	Q14764|MVP_HUMAN	349.01	99327	28	52	Major vault protein OS=Homo sapiens OX=9606 GN=MVP PE=1 SV=4	Q14764		MVP	2413.1	2903.35	2183.9	3023.2	2301.6	3119
1359	6706	P61604|CH10_HUMAN	147.46	10932	2	24	10 kDa heat shock protein mitochondrial OS=Homo sapiens OX=9606 GN=HSPE1 PE=1 SV=2	P61604		CH10	2058.74	3493.6	3607.25	3199.25	3287.35	3249.85
475	559	O43242|PSMD3_HUMAN	327.2	60978	18	41	26S proteasome non-ATPase regulatory subunit 3 OS=Homo sapiens OX=9606 GN=PSMD3 PE=1 SV=2	O43242		PSMD3	3321.9	3190.55	3039.9	3147.15	3089.05	3210.1
361	295	Q9BSJ8-2|ESYT1_HUMAN	314.37	124003	25	31	Isoform 2 of Extended synaptotagmin-1 OS=Homo sapiens OX=9606 GN=ESYT1	Q9BSJ8	2	ESYT1	2268.9	1245.26	1358.3	1909.1	1959.9	2580
246	1703	P61981|1433G_HUMAN	317.89	28303	11	59	14-3-3 protein gamma OS=Homo sapiens OX=9606 GN=YWHAG PE=1 SV=2	P61981		1433G	3281.8	3316.45	2454.55	2925.2	4626.6	3188.5
229	562	O95573|ACSL3_HUMAN	388.25	80420	23	51	Long-chain-fatty-acid--CoA ligase 3 OS=Homo sapiens OX=9606 GN=ACSL3 PE=1 SV=3	O95573		ACSL3	4470.2	4393.2	3802.65	4839.65	3173.15	3210.2
712	1274	P21399|ACOC_HUMAN	297.87	98399	16	29	Cytoplasmic aconitate hydratase OS=Homo sapiens OX=9606 GN=ACO1 PE=1 SV=3	P21399		ACOC	711.78	764.43	862.44	1230.4	1875.1	2232.9
307	444	Q13435|SF3B2_HUMAN	350.68	100228	25	38	Splicing factor 3B subunit 2 OS=Homo sapiens OX=9606 GN=SF3B2 PE=1 SV=2	Q13435		SF3B2	3077.2	2831.4	3267.3	2508.6	2233.9	2768.1
317	358	Q9NZB2|F120A_HUMAN	372.65	121888	28	36	Constitutive coactivator of PPAR-gamma-like protein 1 OS=Homo sapiens OX=9606 GN=FAM120A PE=1 SV=2	Q9NZB2		F120A	2735.8	2217.75	2484.35	3604.2	3087.95	3337.8
891	3481	P61619|S61A1_HUMAN	218	52265	7	20	Protein transport protein Sec61 subunit alpha isoform 1 OS=Homo sapiens OX=9606 GN=SEC61A1 PE=1 SV=2	P61619		S61A1	3022	2577.45	2838.3	2729.55	2944.45	3023.1
349	979	P05198|IF2A_HUMAN	313.28	36112	16	52	Eukaryotic translation initiation factor 2 subunit 1 OS=Homo sapiens OX=9606 GN=EIF2S1 PE=1 SV=3	P05198		IF2A	3474.5	1746.65	3264.25	2454.7	3033.75	3175.9
806	2075	Q9Y285-2|SYFA_HUMAN	309.66	54158	8	37	Isoform 2 of Phenylalanine--tRNA ligase alpha subunit OS=Homo sapiens OX=9606 GN=FARSA	Q9Y285	2	SYFA	2083.7	1312.02	1650.35	2975.45	2511.7	3018.35
485	626	Q14566|MCM6_HUMAN	305.84	92889	17	23	DNA replication licensing factor MCM6 OS=Homo sapiens OX=9606 GN=MCM6 PE=1 SV=1	Q14566		MCM6	2173.1	4255.5	5136.35	3202.95	3125.7	3161.5
476	944	P51659-2|DHB4_HUMAN	340.69	83025	18	35	Isoform 2 of Peroxisomal multifunctional enzyme type 2 OS=Homo sapiens OX=9606 GN=HSD17B4	P51659	2	DHB4	2619.8	2667.65	2917.05	2631.25	2399.55	2787.7
1069	5690	P17096|HMGA1_HUMAN	196.27	11676	2	41	High mobility group protein HMG-I/HMG-Y OS=Homo sapiens OX=9606 GN=HMGA1 PE=1 SV=3	P17096		HMGA1	3394.85	5551.5	5879.6	3179.85	2882.45	3106.85
667	1764	Q15293|RCN1_HUMAN	290.01	38890	12	52	Reticulocalbin-1 OS=Homo sapiens OX=9606 GN=RCN1 PE=1 SV=1	Q15293		RCN1	2461.45	1714.6	2046.8	3265.5	2619.7	3141.1
413	540	O00410|IPO5_HUMAN	365.88	123630	26	39	Importin-5 OS=Homo sapiens OX=9606 GN=IPO5 PE=1 SV=4	O00410		IPO5	2913.05	2353.85	2737.55	3130.3	3039.45	3138.1
906	2470	P27635|RL10_HUMAN	239.9	24604	10	46	60S ribosomal protein L10 OS=Homo sapiens OX=9606 GN=RPL10 PE=1 SV=4	P27635		RL10	3759.85	2646.45	3426.2	3025.15	3036.5	3102.75
556	1597	P62333|PRS10_HUMAN	315.27	44173	15	49	26S proteasome regulatory subunit 10B OS=Homo sapiens OX=9606 GN=PSMC6 PE=1 SV=1	P62333		PRS10	2827.15	2727.65	3232.55	3021.2	3314.15	3127.8
671	805	P25685|DNJB1_HUMAN	268.05	38044	16	54	DnaJ homolog subfamily B member 1 OS=Homo sapiens OX=9606 GN=DNAJB1 PE=1 SV=4	P25685		DNJB1	2036.85	1925.45	1339.75	2096.25	1808.35	2865.65
731	2699	O14979-3|HNRDL_HUMAN	268.06	27191	9	48	Isoform 3 of Heterogeneous nuclear ribonucleoprotein D-like OS=Homo sapiens OX=9606 GN=HNRNPDL	O14979	3	HNRDL	3110.75	3347.05	3412.4	2855.75	3137.95	3080.35
501	1820	O95758-4|PTBP3_HUMAN	314.25	60417	10	33	Isoform 4 of Polypyrimidine tract-binding protein 3 OS=Homo sapiens OX=9606 GN=PTBP3	O95758	4	PTBP3	2348.15	2342.65	1861.1	2434.3	2238.85	2799.1
713	4540	P19105|ML12A_HUMAN	260.78	19794	7	51	Myosin regulatory light chain 12A OS=Homo sapiens OX=9606 GN=MYL12A PE=1 SV=2	P19105		ML12A	3127.85	3237.7	3608	3340.25	3363.7	3231.25
729	1980	P40925-3|MDHC_HUMAN	277.76	38628	9	38	Isoform 3 of Malate dehydrogenase cytoplasmic OS=Homo sapiens OX=9606 GN=MDH1	P40925	3	MDHC	2777.45	2565.9	2100.75	3017.95	3100.7	3102.5
311	2371	P67809|YBOX1_HUMAN	331.83	35924	10	43	Y-box-binding protein 1 OS=Homo sapiens OX=9606 GN=YBX1 PE=1 SV=3	P67809		YBOX1	3975.35	3435.6	3012.15	3351.1	3538.6	3304.9
1259	4918	P42766|RL35_HUMAN	176.3	14551	5	37	60S ribosomal protein L35 OS=Homo sapiens OX=9606 GN=RPL35 PE=1 SV=2	P42766		RL35	1611.5	3626.5	2627.45	2985.75	3277.95	3061.55
524	1038	O00515|LAD1_HUMAN	329.99	57131	16	40	Ladinin-1 OS=Homo sapiens OX=9606 GN=LAD1 PE=1 SV=2	O00515		LAD1	3043	2693.7	3225.2	3093.4	2811.85	3081.8
532	2048	O15143|ARC1B_HUMAN	312.41	40950	12	45	Actin-related protein 2/3 complex subunit 1B OS=Homo sapiens OX=9606 GN=ARPC1B PE=1 SV=3	O15143		ARC1B	2920.45	2536.6	2711.8	2435.75	2772.6	2817.6
510	1182	Q07960|RHG01_HUMAN	343.38	50436	18	58	Rho GTPase-activating protein 1 OS=Homo sapiens OX=9606 GN=ARHGAP1 PE=1 SV=1	Q07960		RHG01	2650.8	2164.6	2581.1	2827.4	2897	3017.05
313	2282	O15144|ARPC2_HUMAN	296.63	34333	14	54	Actin-related protein 2/3 complex subunit 2 OS=Homo sapiens OX=9606 GN=ARPC2 PE=1 SV=1	O15144		ARPC2	4432.1	7330.25	4612.2	4897.45	4359.25	3772.3
3634	6823	Q7RTP6|MICA3_HUMAN	82.55	224293	1	1	[F-actin]-monooxygenase MICAL3 OS=Homo sapiens OX=9606 GN=MICAL3 PE=1 SV=2	Q7RTP6		MICA3	18.21	20.2	233.2	23.65	0	1520.3
365	868	Q92499|DDX1_HUMAN	329.11	82432	17	32	ATP-dependent RNA helicase DDX1 OS=Homo sapiens OX=9606 GN=DDX1 PE=1 SV=2	Q92499		DDX1	1880.9	1915.3	1539.05	2765.3	1896.7	2848.65
415	1139	P00367|DHE3_HUMAN	330.44	61398	16	46	Glutamate dehydrogenase 1 mitochondrial OS=Homo sapiens OX=9606 GN=GLUD1 PE=1 SV=2	P00367		DHE3	2839.3	2975.7	2262.25	2776.8	2817.15	2943.65
412	685	Q13310-2|PABP4_HUMAN	348.84	69579	14	36	Isoform 2 of Polyadenylate-binding protein 4 OS=Homo sapiens OX=9606 GN=PABPC4	Q13310	2	PABP4	2969.8	2553.65	2785.05	2927.1	2365	2992.4
443	2756	P22695|QCR2_HUMAN	306.26	48443	9	28	Cytochrome b-c1 complex subunit 2 mitochondrial OS=Homo sapiens OX=9606 GN=UQCRC2 PE=1 SV=3	P22695		QCR2	2131.25	2122.6	2010.2	5015.25	2998.4	2959.2
750	1502	P46781|RS9_HUMAN	209.98	22591	11	46	40S ribosomal protein S9 OS=Homo sapiens OX=9606 GN=RPS9 PE=1 SV=3	P46781		RS9	4035.95	3957.55	4542	4164.15	2914.95	3153.2
1211	3860	P62249|RS16_HUMAN	195.63	16445	6	42	40S ribosomal protein S16 OS=Homo sapiens OX=9606 GN=RPS16 PE=1 SV=2	P62249		RS16	2425.5	2202.25	2110.9	1989.75	2647.35	2864.4
727	1522	Q6NZI2|CAVN1_HUMAN	279.91	43476	11	30	Caveolae-associated protein 1 OS=Homo sapiens OX=9606 GN=CAVIN1 PE=1 SV=1	Q6NZI2		CAVN1	3673.95	2452.9	2431.85	2476.55	2778.8	2756.75
346	3744	P21291|CSRP1_HUMAN	310.78	20567	8	55	Cysteine and glycine-rich protein 1 OS=Homo sapiens OX=9606 GN=CSRP1 PE=1 SV=3	P21291		CSRP1	4181	5029.55	4744.7	3306.9	2246.4	2920.9
670	2238	P31930|QCR1_HUMAN	347.35	52646	17	50	Cytochrome b-c1 complex subunit 1 mitochondrial OS=Homo sapiens OX=9606 GN=UQCRC1 PE=1 SV=3	P31930		QCR1	1668.2	1366.45	1709.1	2879	2293.85	2870.35
733	1275	P08621|RU17_HUMAN	260.51	51557	13	32	U1 small nuclear ribonucleoprotein 70 kDa OS=Homo sapiens OX=9606 GN=SNRNP70 PE=1 SV=2	P08621		RU17	2077.6	2145.1	2365.35	3362	4336.95	3135.5
1965	9546	Q9UM00|TMCO1_HUMAN	141.93	27079	2	11	Calcium load-activated calcium channel OS=Homo sapiens OX=9606 GN=TMCO1 PE=1 SV=2	Q9UM00		TMCO1	2283.15	2142.1	2413.9	2779.9	2635.1	2802.35
442	884	P16435|NCPR_HUMAN	332.55	76690	22	41	NADPH--cytochrome P450 reductase OS=Homo sapiens OX=9606 GN=POR PE=1 SV=2	P16435		NCPR	2486.4	1717.3	2121	2640.8	2363.35	2722.55
494	1173	Q14166|TTL12_HUMAN	353.31	74404	18	48	Tubulin--tyrosine ligase-like protein 12 OS=Homo sapiens OX=9606 GN=TTLL12 PE=1 SV=2	Q14166		TTL12	2209.4	3222.7	4295.45	3343.95	2644.8	2875.1
959	1714	Q15637-5|SF01_HUMAN	288.98	71752	9	23	Isoform 5 of Splicing factor 1 OS=Homo sapiens OX=9606 GN=SF1	Q15637	5	SF01	2911.65	2551.65	2595.35	2502.7	1959.8	2663.95
457	1046	Q8TEX9-2|IPO4_HUMAN	332.2	118901	22	31	Isoform 2 of Importin-4 OS=Homo sapiens OX=9606 GN=IPO4	Q8TEX9	2	IPO4	1630.4	1405.95	1813.85	1799.8	2123.2	2425.95
1492	5785	P46778|RL21_HUMAN	218.36	18565	5	33	60S ribosomal protein L21 OS=Homo sapiens OX=9606 GN=RPL21 PE=1 SV=2	P46778		RL21	3047.8	2223.42	2925.85	2486.65	1880.76	2838.1
473	1363	P00491|PNPH_HUMAN	326.76	32118	17	77	Purine nucleoside phosphorylase OS=Homo sapiens OX=9606 GN=PNP PE=1 SV=2	P00491		PNPH	3557.8	3407.95	3510.5	3470.3	3815.25	3197.8
1546	4659	P46779|RL28_HUMAN	152.88	15747	4	30	60S ribosomal protein L28 OS=Homo sapiens OX=9606 GN=RPL28 PE=1 SV=3	P46779		RL28	1003.56	639.14	2829.57	494.97	3281.95	1911.97
382	517	P20810-10|ICAL_HUMAN	347.02	82437	19	37	Isoform 10 of Calpastatin OS=Homo sapiens OX=9606 GN=CAST	P20810	10	ICAL	3091.35	2440.25	2820.15	2978.45	2663.45	2826.05
333	386	Q7Z6Z7-2|HUWE1_HUMAN	400.36	480203	37	14	Isoform 2 of E3 ubiquitin-protein ligase HUWE1 OS=Homo sapiens OX=9606 GN=HUWE1	Q7Z6Z7	2	HUWE1	1966.15	1440.95	1804.05	3024.65	2708	2837.7
749	830	P11387|TOP1_HUMAN	273.98	90726	16	27	DNA topoisomerase 1 OS=Homo sapiens OX=9606 GN=TOP1 PE=1 SV=2	P11387		TOP1	2450.15	2008.4	2381.35	1701	2550.05	2396.45
528	3345	P39687|AN32A_HUMAN	247.56	28585	4	33	Acidic leucine-rich nuclear phosphoprotein 32 family member A OS=Homo sapiens OX=9606 GN=ANP32A PE=1 SV=1	P39687		AN32A	1694.5	1626.85	2045.3	2973.95	1736.64	2804.9
422	329	P23229-4|ITA6_HUMAN	341.01	119088	22	31	Isoform Alpha-6X2A of Integrin alpha-6 OS=Homo sapiens OX=9606 GN=ITGA6	P23229	4	ITA6	2185.95	1723.35	2022.9	1921.8	2684.9	2699.75
514	2029	O14818|PSA7_HUMAN	286.19	27887	11	56	Proteasome subunit alpha type-7 OS=Homo sapiens OX=9606 GN=PSMA7 PE=1 SV=1	O14818		PSA7	2451.8	2276.1	2555.7	2697.05	2718.75	2760.8
908	5972	O75347|TBCA_HUMAN	244.27	12855	7	39	Tubulin-specific chaperone A OS=Homo sapiens OX=9606 GN=TBCA PE=1 SV=3	O75347		TBCA	1783.95	2043.55	2189.75	2760.1	2642.7	2746.25
269	498	O76021|RL1D1_HUMAN	352.71	54973	22	44	Ribosomal L1 domain-containing protein 1 OS=Homo sapiens OX=9606 GN=RSL1D1 PE=1 SV=3	O76021		RL1D1	3522.75	2945.5	3471.35	3544.25	2681.45	2836.95
374	2232	Q15019-2|SEPT2_HUMAN	355.78	45461	16	51	Isoform 2 of Septin-2 OS=Homo sapiens OX=9606 GN=SEPTIN2	Q15019	2	2002-09-01	2125.75	2098.3	2417.75	2657.05	2571.8	2768.1
537	1571	Q9P0L0|VAPA_HUMAN	302.42	27893	12	58	Vesicle-associated membrane protein-associated protein A OS=Homo sapiens OX=9606 GN=VAPA PE=1 SV=3	Q9P0L0		VAPA	1684.3	1960.4	4277.4	2406.7	1999.3	2613.45
242	334	Q92900-2|RENT1_HUMAN	377.3	123036	30	37	Isoform 2 of Regulator of nonsense transcripts 1 OS=Homo sapiens OX=9606 GN=UPF1	Q92900	2	RENT1	3199.2	2800.2	2816.15	3527.8	3496	3105.25
460	1042	Q9Y6N5|SQOR_HUMAN	347.97	49961	20	66	Sulfide:quinone oxidoreductase mitochondrial OS=Homo sapiens OX=9606 GN=SQOR PE=1 SV=1	Q9Y6N5		SQOR	2342.6	1981.7	2252.15	2434.05	2499.35	2589.8
378	1926	P25786|PSA1_HUMAN	288.88	29556	12	53	Proteasome subunit alpha type-1 OS=Homo sapiens OX=9606 GN=PSMA1 PE=1 SV=1	P25786		PSA1	3052.9	2971.2	2243.7	2330.15	2450.8	2737.1
796	2319	P37837|TALDO_HUMAN	249.28	37540	11	28	Transaldolase OS=Homo sapiens OX=9606 GN=TALDO1 PE=1 SV=2	P37837		TALDO	2236.45	2720.4	2037.85	3186.3	2728.55	2817.95
376	355	O43795-2|MYO1B_HUMAN	358.59	124951	26	34	Isoform 2 of Unconventional myosin-Ib OS=Homo sapiens OX=9606 GN=MYO1B	O43795	2	MYO1B	2457.25	2859.05	2619.1	2606.05	2570.5	2691.5
3158	9011	Q8N5N7|RM50_HUMAN	104.9	18325	1	12	39S ribosomal protein L50 mitochondrial OS=Homo sapiens OX=9606 GN=MRPL50 PE=1 SV=2	Q8N5N7		RM50	1236.56	0	1023	1974.55	1904	2503.5
390	367	Q15393|SF3B3_HUMAN	364.3	135577	28	36	Splicing factor 3B subunit 3 OS=Homo sapiens OX=9606 GN=SF3B3 PE=1 SV=4	Q15393		SF3B3	2342.4	2594.4	2660.65	3606.1	2730.3	3009.4
843	2717	P46783|RS10_HUMAN	211.88	18898	9	52	40S ribosomal protein S10 OS=Homo sapiens OX=9606 GN=RPS10 PE=1 SV=1	P46783		RS10	3047.8	3295.45	2514.75	2562.35	2592.3	2685.7
815	2871	P43487|RANG_HUMAN	252.97	23310	7	59	Ran-specific GTPase-activating protein OS=Homo sapiens OX=9606 GN=RANBP1 PE=1 SV=1	P43487		RANG	2564.2	2443.7	2121.4	1929.75	2236.15	2486.5
586	3088	P63284|CLPB_ECOLI	274.08	95585	6	11	Chaperone protein ClpB OS=Escherichia coli (strain K12) OX=83333 GN=clpB PE=1 SV=1	P63284		CLPB_ECOLI	3651.8	3878.6	3006.45	1831.5	2099.65	2267.6
631	3855	P59998|ARPC4_HUMAN	259.22	19667	7	50	Actin-related protein 2/3 complex subunit 4 OS=Homo sapiens OX=9606 GN=ARPC4 PE=1 SV=3	P59998		ARPC4	3378.45	5788.75	4215.15	6985.45	2589.9	2899.05
89	2363	O60814|H2B1K_HUMAN	233.67	13890	2	53	Histone H2B type 1-K OS=Homo sapiens OX=9606 GN=H2BC12 PE=1 SV=3	O60814		H2B1K	3696.6	4865.25	2769	4157.05	5094.3	3455.3
786	6272	P0C0S5|H2AZ_HUMAN	181.71	13553	3	31	Histone H2A.Z OS=Homo sapiens OX=9606 GN=H2AZ1 PE=1 SV=2	P0C0S5		H2AZ	2731.45	2242.4	2498.5	2277.1	2417.6	2493.95
329	433	Q99460|PSMD1_HUMAN	366.31	105836	27	39	26S proteasome non-ATPase regulatory subunit 1 OS=Homo sapiens OX=9606 GN=PSMD1 PE=1 SV=2	Q99460		PSMD1	2317.05	2219.05	2538	2500.85	2971.8	2637.3
472	486	P54136|SYRC_HUMAN	352.5	75379	26	47	Arginine--tRNA ligase cytoplasmic OS=Homo sapiens OX=9606 GN=RARS1 PE=1 SV=2	P54136		SYRC	2809.35	2231.15	2392.15	2629	2418.2	2589.85
226	174	P47897|SYQ_HUMAN	380.94	87799	27	40	Glutamine--tRNA ligase OS=Homo sapiens OX=9606 GN=QARS1 PE=1 SV=1	P47897		SYQ	3005.05	3240.65	3133.35	3935.4	3494.55	3057.05
811	1911	P16949|STMN1_HUMAN	223.02	17302	11	53	Stathmin OS=Homo sapiens OX=9606 GN=STMN1 PE=1 SV=3	P16949		STMN1	2733.5	2303.25	2028.6	2040.4	2132.5	2486.6
186	359	Q04637-5|IF4G1_HUMAN	372.69	158516	36	36	Isoform D of Eukaryotic translation initiation factor 4 gamma 1 OS=Homo sapiens OX=9606 GN=EIF4G1	Q04637	5	IF4G1	5094.5	3928.9	4756.65	4937.95	3036.2	3000.05
564	4433	P62829|RL23_HUMAN	295.1	14865	9	55	60S ribosomal protein L23 OS=Homo sapiens OX=9606 GN=RPL23 PE=1 SV=1	P62829		RL23	2185.65	2499.45	2446.95	2289.25	3214.95	2766.35
710	2496	Q9Y2Q3-2|GSTK1_HUMAN	261.9	31566	9	46	Isoform 2 of Glutathione S-transferase kappa 1 OS=Homo sapiens OX=9606 GN=GSTK1	Q9Y2Q3	2	GSTK1	1295.15	2466.95	2702.9	2743.9	3239.55	2751.8
355	256	Q92878-2|RAD50_HUMAN	328.89	154587	26	25	Isoform 2 of DNA repair protein RAD50 OS=Homo sapiens OX=9606 GN=RAD50	Q92878	2	RAD50	1916.8	1821.65	1708.4	2408.2	2052.45	2504.1
563	1333	P41091|IF2G_HUMAN	291.6	51110	12	38	Eukaryotic translation initiation factor 2 subunit 3 OS=Homo sapiens OX=9606 GN=EIF2S3 PE=1 SV=3	P41091		IF2G	2492.15	2685.35	2869	2705.3	2610.4	2593.3
880	1273	P38606|VATA_HUMAN	291.79	68304	17	44	V-type proton ATPase catalytic subunit A OS=Homo sapiens OX=9606 GN=ATP6V1A PE=1 SV=2	P38606		VATA	377.39	406.67	423	904.24	651.06	1716.97
362	634	P55884|EIF3B_HUMAN	337.28	92482	21	35	Eukaryotic translation initiation factor 3 subunit B OS=Homo sapiens OX=9606 GN=EIF3B PE=1 SV=3	P55884		EIF3B	2723.9	2398.15	2082.9	2830.7	3162.85	2696.4
847	2619	P84098|RL19_HUMAN	209.08	23466	8	36	60S ribosomal protein L19 OS=Homo sapiens OX=9606 GN=RPL19 PE=1 SV=1	P84098		RL19	4434.65	2026.75	1491.1	2438.7	2388.45	2563.4
599	1295	Q13409-2|DC1I2_HUMAN	311.43	70645	14	43	Isoform 2B of Cytoplasmic dynein 1 intermediate chain 2 OS=Homo sapiens OX=9606 GN=DYNC1I2	Q13409	2	DC1I2	1754.25	1655.3	1893.85	2444.65	2353.5	2514.9
1090	3692	P26373|RL13_HUMAN	197.42	24261	7	38	60S ribosomal protein L13 OS=Homo sapiens OX=9606 GN=RPL13 PE=1 SV=4	P26373		RL13	3325.7	2380.85	2681.45	1798.75	3239.1	2320.85
497	1064	P31939|PUR9_HUMAN	344.73	64616	20	46	Bifunctional purine biosynthesis protein ATIC OS=Homo sapiens OX=9606 GN=ATIC PE=1 SV=3	P31939		PUR9	2445	2255.5	2429.25	1787.6	2379.65	2218.45
480	2462	Q16576-2|RBBP7_HUMAN	360.44	52314	10	43	Isoform 2 of Histone-binding protein RBBP7 OS=Homo sapiens OX=9606 GN=RBBP7	Q16576	2	RBBP7	2252.15	3394.5	2335.35	3405.3	2754.05	2704.15
1155	4701	E9PAV3|NACAM_HUMAN	197.34	205419	4	2	Nascent polypeptide-associated complex subunit alpha muscle-specific form OS=Homo sapiens OX=9606 GN=NACA PE=1 SV=1	E9PAV3		NACAM	2543.15	1519.37	1906.45	1412.86	2567.55	2496.8
489	834	P43304|GPDM_HUMAN	343.14	80853	22	44	Glycerol-3-phosphate dehydrogenase mitochondrial OS=Homo sapiens OX=9606 GN=GPD2 PE=1 SV=3	P43304		GPDM	1947.95	1955.3	1859.95	2511.55	3159.45	2601
1666	32931	P20962|PTMS_HUMAN	128.45	11530	2	13	Parathymosin OS=Homo sapiens OX=9606 GN=PTMS PE=1 SV=2	P20962		PTMS	1413.3	1343.2	886.7	2097.6	1504.05	2346.45
1046	2976	Q13347|EIF3I_HUMAN	235.24	36502	8	36	Eukaryotic translation initiation factor 3 subunit I OS=Homo sapiens OX=9606 GN=EIF3I PE=1 SV=1	Q13347		EIF3I	2500.25	2223.8	1853.8	1698.17	1830.85	2443.15
400	717	Q9Y2A7|NCKP1_HUMAN	359.53	128790	23	29	Nck-associated protein 1 OS=Homo sapiens OX=9606 GN=NCKAP1 PE=1 SV=1	Q9Y2A7		NCKP1	1451.55	1301.25	1322.5	2309.25	2184.05	2331.7
306	219	Q9Y5B9|SP16H_HUMAN	361.47	119914	30	35	FACT complex subunit SPT16 OS=Homo sapiens OX=9606 GN=SUPT16H PE=1 SV=1	Q9Y5B9		SP16H	2883.9	2035	2708.2	3298.85	2578.3	2871.35
446	228	Q14683|SMC1A_HUMAN	317.91	143233	27	28	Structural maintenance of chromosomes protein 1A OS=Homo sapiens OX=9606 GN=SMC1A PE=1 SV=2	Q14683		SMC1A	2526.05	1731.8	1466.65	2258.8	2213.35	2399.55
93	19	P31948|STIP1_HUMAN	415.95	62639	6	53	Stress-induced-phosphoprotein 1 OS=Homo sapiens OX=9606 GN=STIP1 PE=1 SV=1	P31948		STIP1	2387.65	2304	2295.7	2108.7	1896.6	2297.2
1029	10895	P63220|RS21_HUMAN	174.99	9111	3	35	40S ribosomal protein S21 OS=Homo sapiens OX=9606 GN=RPS21 PE=1 SV=1	P63220		RS21	3452.85	3466.45	3667.45	2376.65	2491.95	2447.9
341	832	Q9Y2X3|NOP58_HUMAN	333.96	59578	16	34	Nucleolar protein 58 OS=Homo sapiens OX=9606 GN=NOP58 PE=1 SV=1	Q9Y2X3		NOP58	2009.75	2610.8	2129.4	2000.9	1979.3	2363.5
791	3871	P84103|SRSF3_HUMAN	216.91	19330	6	36	Serine/arginine-rich splicing factor 3 OS=Homo sapiens OX=9606 GN=SRSF3 PE=1 SV=1	P84103		SRSF3	2651.2	2506.65	2644.15	2355.05	2494.05	2447
397	1960	Q8TDN6|BRX1_HUMAN	333.89	41401	16	56	Ribosome biogenesis protein BRX1 homolog OS=Homo sapiens OX=9606 GN=BRIX1 PE=1 SV=2	Q8TDN6		BRX1	2260.05	4224.3	4286.25	2811.5	2964.15	2592.8
633	2790	Q15084-5|PDIA6_HUMAN	294.78	53261	12	33	Isoform 5 of Protein disulfide-isomerase A6 OS=Homo sapiens OX=9606 GN=PDIA6	Q15084	5	PDIA6	1586.45	820.87	1643.6	2235.4	1679.15	2337.15
3778	76760	Q9ULH7|MRTFB_HUMAN	95.57	118127	3	4	Myocardin-related transcription factor B OS=Homo sapiens OX=9606 GN=MRTFB PE=1 SV=3	Q9ULH7		MRTFB	1234.4	1325.2	0	0	1278.9	1202
732	2530	P15374|UCHL3_HUMAN	270.62	26183	8	57	Ubiquitin carboxyl-terminal hydrolase isozyme L3 OS=Homo sapiens OX=9606 GN=UCHL3 PE=1 SV=1	P15374		UCHL3	1645.35	1658.95	1797.3	2110.85	1882.25	2183.05
493	818	P17858|PFKAL_HUMAN	351.78	85018	18	37	ATP-dependent 6-phosphofructokinase liver type OS=Homo sapiens OX=9606 GN=PFKL PE=1 SV=6	P17858		PFKAL	2414.65	2786.35	2428.55	2974.35	2507.85	2558.35
538	1149	Q01581|HMCS1_HUMAN	350.36	57294	17	57	Hydroxymethylglutaryl-CoA synthase cytoplasmic OS=Homo sapiens OX=9606 GN=HMGCS1 PE=1 SV=2	Q01581		HMCS1	2050.6	1440.3	1129.75	2032.65	1588.5	2063.45
1284	10521	Q9H299|SH3L3_HUMAN	162.28	10438	4	30	SH3 domain-binding glutamic acid-rich-like protein 3 OS=Homo sapiens OX=9606 GN=SH3BGRL3 PE=1 SV=1	Q9H299		SH3L3	2269.8	2451.5	2650.1	2236.55	2954.65	2339.6
428	3176	P21964-2|COMT_HUMAN	314.74	24449	12	58	Isoform Soluble of Catechol O-methyltransferase OS=Homo sapiens OX=9606 GN=COMT	P21964	2	COMT	2061.4	2183.65	2002.3	2662.9	2596.45	2498.8
897	1706	Q99729-3|ROAA_HUMAN	287.11	30588	12	42	Isoform 3 of Heterogeneous nuclear ribonucleoprotein A/B OS=Homo sapiens OX=9606 GN=HNRNPAB	Q99729	3	ROAA	2153.5	2368.3	2429.15	2501.85	1967	2382.3
748	1492	P06396-4|GELS_HUMAN	281.45	81485	11	25	Isoform 4 of Gelsolin OS=Homo sapiens OX=9606 GN=GSN	P06396	4	GELS	2309.15	1955.9	1940.25	2050.05	2317.1	2341.45
305	1157	Q9Y265|RUVB1_HUMAN	343.35	50228	15	45	RuvB-like 1 OS=Homo sapiens OX=9606 GN=RUVBL1 PE=1 SV=1	Q9Y265		RUVB1	2785.1	3048.65	3350.7	2664.1	2598.85	2379.6
509	3148	Q00688|FKBP3_HUMAN	281.29	25177	7	40	Peptidyl-prolyl cis-trans isomerase FKBP3 OS=Homo sapiens OX=9606 GN=FKBP3 PE=1 SV=1	Q00688		FKBP3	2914.75	2739.2	2780.95	2463.35	2825.35	2378.1
217	164	P46013|KI67_HUMAN	420.26	358695	58	27	Proliferation marker protein Ki-67 OS=Homo sapiens OX=9606 GN=MKI67 PE=1 SV=2	P46013		KI67	995.54	777.6	861.93	2423.05	2106.25	2306.1
596	5352	O43681|GET3_HUMAN	286.94	38793	11	42	ATPase GET3 OS=Homo sapiens OX=9606 GN=GET3 PE=1 SV=2	O43681		GET3	2126.5	2030.8	1994.25	2142.6	2192.8	2274.35
464	412	Q86UX7-2|URP2_HUMAN	327.76	75430	23	49	Isoform 2 of Fermitin family homolog 3 OS=Homo sapiens OX=9606 GN=FERMT3	Q86UX7	2	URP2	1893.2	1676.9	1815	1698.1	1878.75	2129.3
612	1890	P17980|PRS6A_HUMAN	306.01	49204	16	44	26S proteasome regulatory subunit 6A OS=Homo sapiens OX=9606 GN=PSMC3 PE=1 SV=3	P17980		PRS6A	2186.65	1455.05	1780.6	1270.51	2599.6	2218.5
357	816	Q08J23|NSUN2_HUMAN	348.76	86471	26	41	RNA cytosine C(5)-methyltransferase NSUN2 OS=Homo sapiens OX=9606 GN=NSUN2 PE=1 SV=2	Q08J23		NSUN2	2702.95	3338.05	3040.1	2782.1	2765.8	2506.9
746	2439	P00492|HPRT_HUMAN	250.82	24579	10	67	Hypoxanthine-guanine phosphoribosyltransferase OS=Homo sapiens OX=9606 GN=HPRT1 PE=1 SV=2	P00492		HPRT	2784.9	2719.5	2445.05	2706.4	2528.95	2457.65
530	1665	Q9HB71|CYBP_HUMAN	305.85	26210	14	64	Calcyclin-binding protein OS=Homo sapiens OX=9606 GN=CACYBP PE=1 SV=2	Q9HB71		CYBP	2869.6	2671.25	2782.95	2119.65	2104.3	2305.25
851	2022	Q9Y3A5|SBDS_HUMAN	293.87	28764	10	54	Ribosome maturation protein SBDS OS=Homo sapiens OX=9606 GN=SBDS PE=1 SV=4	Q9Y3A5		SBDS	2514.25	2417.7	2528.65	3253.8	2147.75	2335.2
754	3926	P63279|UBC9_HUMAN	273.11	18007	7	77	SUMO-conjugating enzyme UBC9 OS=Homo sapiens OX=9606 GN=UBE2I PE=1 SV=1	P63279		UBC9	2936.35	1720.3	2156.35	1621.1	1724.85	2030.2
820	1039	P14868|SYDC_HUMAN	303.87	57136	15	44	Aspartate--tRNA ligase cytoplasmic OS=Homo sapiens OX=9606 GN=DARS1 PE=1 SV=2	P14868		SYDC	1971.7	2011.3	1990.95	2178.75	2020.4	2191.25
1059	3251	P20618|PSB1_HUMAN	252.01	26489	8	38	Proteasome subunit beta type-1 OS=Homo sapiens OX=9606 GN=PSMB1 PE=1 SV=2	P20618		PSB1	2078.3	2169.1	3917.85	2422.15	2374.1	2346.85
899	3520	P29966|MARCS_HUMAN	265.73	31555	7	40	Myristoylated alanine-rich C-kinase substrate OS=Homo sapiens OX=9606 GN=MARCKS PE=1 SV=4	P29966		MARCS	2052.95	1846.45	4729.1	2453	1992.73	2309.7
793	3355	O15371-3|EIF3D_HUMAN	251.77	62040	10	30	Isoform 3 of Eukaryotic translation initiation factor 3 subunit D OS=Homo sapiens OX=9606 GN=EIF3D	O15371	3	EIF3D	856.32	2051.55	2067.55	2105.5	2108	2208.9
1086	5472	P20290-2|BTF3_HUMAN	203.13	17699	5	50	Isoform 2 of Transcription factor BTF3 OS=Homo sapiens OX=9606 GN=BTF3	P20290	2	BTF3	1841.3	1589.8	1661.8	1958.15	1529.95	2044.9
318	1208	P43686|PRS6B_HUMAN	331.26	47366	25	69	26S proteasome regulatory subunit 6B OS=Homo sapiens OX=9606 GN=PSMC4 PE=1 SV=2	P43686		PRS6B	2638.1	2834.65	2004.35	2868.3	2661.45	2489.55
595	3300	P62263|RS14_HUMAN	307.18	16273	9	70	40S ribosomal protein S14 OS=Homo sapiens OX=9606 GN=RPS14 PE=1 SV=3	P62263		RS14	1767.35	1866.2	2357.9	2504.65	2350.6	2312.5
344	829	O60701|UGDH_HUMAN	321.88	55024	18	46	UDP-glucose 6-dehydrogenase OS=Homo sapiens OX=9606 GN=UGDH PE=1 SV=1	O60701		UGDH	3133.1	3339.2	3062.7	2631.05	2347.6	2385.2
895	2660	P23396|RS3_HUMAN	244.66	26688	13	62	40S ribosomal protein S3 OS=Homo sapiens OX=9606 GN=RPS3 PE=1 SV=2	P23396		RS3	1523.46	1478.6	1492.91	1648.4	2031	2001.4
627	2208	O15347|HMGB3_HUMAN	308.46	22980	13	58	High mobility group protein B3 OS=Homo sapiens OX=9606 GN=HMGB3 PE=1 SV=4	O15347		HMGB3	1529.55	1190.2	1225.85	2239.1	2350.2	2263.35
647	1145	Q9Y266|NUDC_HUMAN	294.72	38243	15	50	Nuclear migration protein nudC OS=Homo sapiens OX=9606 GN=NUDC PE=1 SV=1	Q9Y266		NUDC	1696.25	1263.75	1456.25	1652.55	1263.45	1887.15
159	1508	O43852-3|CALU_HUMAN	392.64	38051	5	69	Isoform 3 of Calumenin OS=Homo sapiens OX=9606 GN=CALU	O43852	3	CALU	1326.53	1259.4	1157.85	2148.5	2021.75	2202.25
417	688	O60568|PLOD3_HUMAN	327.75	84785	16	36	Multifunctional procollagen lysine hydroxylase and glycosyltransferase LH3 OS=Homo sapiens OX=9606 GN=PLOD3 PE=1 SV=1	O60568		PLOD3	2498.3	1734.2	2266.95	2931.8	2672.5	2583.2
630	714	Q8N1G4|LRC47_HUMAN	329.66	63473	17	45	Leucine-rich repeat-containing protein 47 OS=Homo sapiens OX=9606 GN=LRRC47 PE=1 SV=1	Q8N1G4		LRC47	2137.45	2294.35	1840.35	2139.6	2096.25	2242.65
531	2151	Q8WVM8|SCFD1_HUMAN	313.91	72380	13	32	Sec1 family domain-containing protein 1 OS=Homo sapiens OX=9606 GN=SCFD1 PE=1 SV=4	Q8WVM8		SCFD1	2349.65	2097.3	1623.55	2102.45	1955.7	2125.75
1273	2774	P51149|RAB7A_HUMAN	226.25	23490	8	49	Ras-related protein Rab-7a OS=Homo sapiens OX=9606 GN=RAB7A PE=1 SV=1	P51149		RAB7A	1777.7	1367.15	1955.3	1804.1	2160.4	2211.7
469	1585	Q9Y230|RUVB2_HUMAN	308.92	51157	16	38	RuvB-like 2 OS=Homo sapiens OX=9606 GN=RUVBL2 PE=1 SV=3	Q9Y230		RUVB2	2361.7	2347.3	2130.6	1408.8	1765.6	1903.65
257	152	Q13619|CUL4A_HUMAN	363.47	87680	21	46	Cullin-4A OS=Homo sapiens OX=9606 GN=CUL4A PE=1 SV=3	Q13619		CUL4A	1799	1591.1	1844.1	2180.15	1782.25	2185.9
454	589	Q12931|TRAP1_HUMAN	355.53	80110	24	47	Heat shock protein 75 kDa mitochondrial OS=Homo sapiens OX=9606 GN=TRAP1 PE=1 SV=3	Q12931		TRAP1	1671.4	2333.8	2781.25	2637.75	2279.35	2320.9
602	3643	P30048-2|PRDX3_HUMAN	286.02	25839	8	56	Isoform 2 of Thioredoxin-dependent peroxide reductase mitochondrial OS=Homo sapiens OX=9606 GN=PRDX3	P30048	2	PRDX3	1608.35	2114.85	1656.6	2754.4	2200.35	2314.75
557	593	P40939|ECHA_HUMAN	346.88	83000	21	43	Trifunctional enzyme subunit alpha mitochondrial OS=Homo sapiens OX=9606 GN=HADHA PE=1 SV=2	P40939		ECHA	1224.7	1123.8	863.9	1906.65	2020.05	2090.95
699	2889	Q13185|CBX3_HUMAN	250.21	20811	7	55	Chromobox protein homolog 3 OS=Homo sapiens OX=9606 GN=CBX3 PE=1 SV=4	Q13185		CBX3	1732.3	1613.15	1727.1	1491.7	2304.5	2200.2
734	2532	P49755|TMEDA_HUMAN	291.88	24976	11	53	Transmembrane emp24 domain-containing protein 10 OS=Homo sapiens OX=9606 GN=TMED10 PE=1 SV=2	P49755		TMEDA	2314.55	2677.1	2234	2916.5	3020.5	2461.5
97	1355	P05141|ADT2_HUMAN	291.74	32852	7	42	ADP/ATP translocase 2 OS=Homo sapiens OX=9606 GN=SLC25A5 PE=1 SV=7	P05141		ADT2	2237.3	1316.56	2249.45	2386.8	1535.28	2216.3
1967	10408	Q15843|NEDD8_HUMAN	133.18	9072	2	35	NEDD8 OS=Homo sapiens OX=9606 GN=NEDD8 PE=1 SV=1	Q15843		NEDD8	996.88	956.36	1092.21	1601.15	1943.15	2036.2
1105	1661	Q86TG7|PEG10_HUMAN	271.76	80173	11	30	Retrotransposon-derived protein PEG10 OS=Homo sapiens OX=9606 GN=PEG10 PE=1 SV=2	Q86TG7		PEG10	331.5	468.34	291.7	1976.75	1982.7	2087.45
1019	2771	Q14444-2|CAPR1_HUMAN	251.04	76862	9	18	Isoform 2 of Caprin-1 OS=Homo sapiens OX=9606 GN=CAPRIN1	Q14444	2	CAPR1	1223.7	1024.42	1295.2	1723.2	1577.45	1908.25
535	635	Q9UKV3-5|ACINU_HUMAN	294.25	150557	22	25	Isoform 4 of Apoptotic chromatin condensation inducer in the nucleus OS=Homo sapiens OX=9606 GN=ACIN1	Q9UKV3	5	ACINU	1547.6	1342.1	1206.4	1799.65	1303.62	1962.35
392	1268	P68400|CSK21_HUMAN	328.05	45144	14	51	Casein kinase II subunit alpha OS=Homo sapiens OX=9606 GN=CSNK2A1 PE=1 SV=1	P68400		CSK21	2586.15	2132.85	2136.5	2015.4	2416.8	2174.05
666	897	P33991|MCM4_HUMAN	332.77	96558	23	38	DNA replication licensing factor MCM4 OS=Homo sapiens OX=9606 GN=MCM4 PE=1 SV=5	P33991		MCM4	1462.5	757.77	1092.56	2206.4	1908.85	2109.4
420	326	Q9NSE4|SYIM_HUMAN	346.57	113791	29	41	Isoleucine--tRNA ligase mitochondrial OS=Homo sapiens OX=9606 GN=IARS2 PE=1 SV=2	Q9NSE4		SYIM	1321.1	1064.98	1039.26	1816.7	1725.25	2037.8
918	2916	Q9BS26|ERP44_HUMAN	255.18	46971	11	35	Endoplasmic reticulum resident protein 44 OS=Homo sapiens OX=9606 GN=ERP44 PE=1 SV=1	Q9BS26		ERP44	2134.7	1923.75	2048.8	1940.4	2244.2	2139.9
928	5525	P60866|RS20_HUMAN	209.62	13373	6	48	40S ribosomal protein S20 OS=Homo sapiens OX=9606 GN=RPS20 PE=1 SV=1	P60866		RS20	2357.3	2369.85	1898.2	1969.15	2080.9	2117.75
1905	9139	Q9Y3U8|RL36_HUMAN	118.25	12254	3	21	60S ribosomal protein L36 OS=Homo sapiens OX=9606 GN=RPL36 PE=1 SV=3	Q9Y3U8		RL36	1323.11	1936.85	1547.58	1913	2206.65	2030.4
435	548	Q99832|TCPH_HUMAN	350.39	59367	20	49	T-complex protein 1 subunit eta OS=Homo sapiens OX=9606 GN=CCT7 PE=1 SV=2	Q99832		TCPH	3317.45	3654.35	3409.85	2413.4	2498	2241.6
735	2822	P10155|RO60_HUMAN	284.33	60671	13	36	60 kDa SS-A/Ro ribonucleoprotein OS=Homo sapiens OX=9606 GN=RO60 PE=1 SV=2	P10155		RO60	2124.45	2095.8	2110.65	2351.15	2359.1	2226.95
468	914	O60832|DKC1_HUMAN	335.5	57674	15	42	H/ACA ribonucleoprotein complex subunit DKC1 OS=Homo sapiens OX=9606 GN=DKC1 PE=1 SV=3	O60832		DKC1	1593.3	1602.9	1393.7	1700.25	1810.7	1972.6
694	1610	P21796|VDAC1_HUMAN	261.9	30773	10	60	Voltage-dependent anion-selective channel protein 1 OS=Homo sapiens OX=9606 GN=VDAC1 PE=1 SV=2	P21796		VDAC1	1355.65	1682.45	1500.15	1759.7	1807.1	1962.2
642	1230	Q13423|NNTM_HUMAN	333.57	113895	18	25	NAD(P) transhydrogenase mitochondrial OS=Homo sapiens OX=9606 GN=NNT PE=1 SV=3	Q13423		NNTM	1095.19	749.42	1069.75	1072.1	2117.65	1938.1
1607	6762	Q8TBX8|PI42C_HUMAN	234.66	47300	6	22	Phosphatidylinositol 5-phosphate 4-kinase type-2 gamma OS=Homo sapiens OX=9606 GN=PIP4K2C PE=1 SV=3	Q8TBX8		PI42C	1381.9	1425.65	1228.58	2166	2085.85	2117.1
855	2852	P07339|CATD_HUMAN	246.01	44552	13	51	Cathepsin D OS=Homo sapiens OX=9606 GN=CTSD PE=1 SV=1	P07339		CATD	1494.9	1545.82	1232.7	2417.25	2502.7	2116.5
937	987	P19367-2|HXK1_HUMAN	288.84	102201	15	27	Isoform 2 of Hexokinase-1 OS=Homo sapiens OX=9606 GN=HK1	P19367	2	HXK1	1646.95	1443.1	1472.05	1795	1941.4	2020.25
342	134	Q9UQE7|SMC3_HUMAN	364.84	141541	32	32	Structural maintenance of chromosomes protein 3 OS=Homo sapiens OX=9606 GN=SMC3 PE=1 SV=2	Q9UQE7		SMC3	1538.4	1413.55	1873.6	2386	2033.85	2147.1
678	1914	Q9BWD1|THIC_HUMAN	323.81	41351	12	61	Acetyl-CoA acetyltransferase cytosolic OS=Homo sapiens OX=9606 GN=ACAT2 PE=1 SV=2	Q9BWD1		THIC	2132.85	1990.65	2117.7	2240	2131.15	2148.85
585	1286	P48739|PIPNB_HUMAN	312.42	31540	13	72	Phosphatidylinositol transfer protein beta isoform OS=Homo sapiens OX=9606 GN=PITPNB PE=1 SV=2	P48739		PIPNB	1996.15	2118.35	2060	2167.8	2013.35	2065.4
621	1370	P36871|PGM1_HUMAN	305.55	61449	12	28	Phosphoglucomutase-1 OS=Homo sapiens OX=9606 GN=PGM1 PE=1 SV=3	P36871		PGM1	1944.85	1855.7	1910.25	1991.2	1833.25	1996.7
430	681	P54886-2|P5CS_HUMAN	367.62	87089	19	29	Isoform Short of Delta-1-pyrroline-5-carboxylate synthase OS=Homo sapiens OX=9606 GN=ALDH18A1	P54886	2	P5CS	1616.9	1184	1708.1	2068.6	2356.5	2085.6
1038	4106	Q9Y696|CLIC4_HUMAN	256.51	28772	10	56	Chloride intracellular channel protein 4 OS=Homo sapiens OX=9606 GN=CLIC4 PE=1 SV=4	Q9Y696		CLIC4	3042.1	1988.55	2293.4	2269.9	2371.7	2146.05
634	1587	Q96A33|CCD47_HUMAN	289.38	55874	11	27	Coiled-coil domain-containing protein 47 OS=Homo sapiens OX=9606 GN=CCDC47 PE=1 SV=1	Q96A33		CCD47	2312.85	5199.85	2569.4	3476.3	2915.45	2493.4
425	524	P48444|COPD_HUMAN	348.79	57210	21	45	Coatomer subunit delta OS=Homo sapiens OX=9606 GN=ARCN1 PE=1 SV=1	P48444		COPD	3489.4	3467.65	3068.85	2569.9	2555.75	2301.85
370	1253	P29508|SPB3_HUMAN	330.13	44565	14	64	Serpin B3 OS=Homo sapiens OX=9606 GN=SERPINB3 PE=1 SV=2	P29508		SPB3	3194.75	1879.4	2503.6	3069.25	3148.2	2514.5
930	2042	Q9BPW9|DHRS9_HUMAN	287.94	35227	11	39	Dehydrogenase/reductase SDR family member 9 OS=Homo sapiens OX=9606 GN=DHRS9 PE=1 SV=1	Q9BPW9		DHRS9	3065	3210.95	3078	2032.15	2017.35	2055.7
542	1814	P42765|THIM_HUMAN	343.71	41924	19	65	3-ketoacyl-CoA thiolase mitochondrial OS=Homo sapiens OX=9606 GN=ACAA2 PE=1 SV=2	P42765		THIM	1676.35	1764.8	1921.35	2023.3	2163.75	2067.3
424	591	Q92841|DDX17_HUMAN	296.2	80273	14	32	Probable ATP-dependent RNA helicase DDX17 OS=Homo sapiens OX=9606 GN=DDX17 PE=1 SV=2	Q92841		DDX17	1639.6	1671.85	1497.8	1731	2014.7	1933.95
755	2687	P62750|RL23A_HUMAN	250.25	17695	13	53	60S ribosomal protein L23a OS=Homo sapiens OX=9606 GN=RPL23A PE=1 SV=1	P62750		RL23A	2965.05	2583.75	2221.15	2393.5	2281.35	2166.55
583	1107	P48147|PPCE_HUMAN	332.14	80700	17	35	Prolyl endopeptidase OS=Homo sapiens OX=9606 GN=PREP PE=1 SV=2	P48147		PPCE	1892	1566.75	1916.9	2012.8	1985	2039.3
483	242	Q9UM54-6|MYO6_HUMAN	321.92	148658	22	26	Isoform 6 of Unconventional myosin-VI OS=Homo sapiens OX=9606 GN=MYO6	Q9UM54	6	MYO6	1747.35	2013.9	1894.9	2078.65	1738.2	1907.45
1446	5176	Q99436|PSB7_HUMAN	196.58	29965	5	21	Proteasome subunit beta type-7 OS=Homo sapiens OX=9606 GN=PSMB7 PE=1 SV=1	Q99436		PSB7	1933.65	1863.35	2025.7	2211.1	1872.2	2029.1
380	240	Q9NTJ3|SMC4_HUMAN	350.96	147182	30	29	Structural maintenance of chromosomes protein 4 OS=Homo sapiens OX=9606 GN=SMC4 PE=1 SV=2	Q9NTJ3		SMC4	1513.75	1284.6	1216.45	1742.05	2058.3	1901.75
658	2486	O43776|SYNC_HUMAN	322.46	62943	19	41	Asparagine--tRNA ligase cytoplasmic OS=Homo sapiens OX=9606 GN=NARS1 PE=1 SV=1	O43776		SYNC	1749.95	1848.85	1570.55	1444.2	1668.55	1838.85
697	1487	P53582|MAP11_HUMAN	287.8	43215	12	55	Methionine aminopeptidase 1 OS=Homo sapiens OX=9606 GN=METAP1 PE=1 SV=2	P53582		MAP11	1389.3	1506.65	1567.1	1921.35	1511.65	1951.25
3925	4537	Q14139|UBE4A_HUMAN	118.07	122560	5	8	Ubiquitin conjugation factor E4 A OS=Homo sapiens OX=9606 GN=UBE4A PE=1 SV=2	Q14139		UBE4A	0	20.25	0	1255.66	0	1033.21
459	1150	Q6DD88|ATLA3_HUMAN	330.23	60542	17	54	Atlastin-3 OS=Homo sapiens OX=9606 GN=ATL3 PE=1 SV=1	Q6DD88		ATLA3	2494	2330.2	1775	2188.25	2060.3	2049.65
904	1361	Q9Y3L3|3BP1_HUMAN	292.61	75713	14	30	SH3 domain-binding protein 1 OS=Homo sapiens OX=9606 GN=SH3BP1 PE=1 SV=3	Q9Y3L3		3BP1	1267.35	668.77	1266.52	1408.8	1183.13	1703.6
316	126	Q00341|VIGLN_HUMAN	351.19	141455	27	31	Vigilin OS=Homo sapiens OX=9606 GN=HDLBP PE=1 SV=2	Q00341		VIGLN	1950.5	1967.3	2031.65	2587.85	2087.3	2212.2
942	4554	Q15102|PA1B3_HUMAN	292.01	25734	6	45	Platelet-activating factor acetylhydrolase IB subunit gamma OS=Homo sapiens OX=9606 GN=PAFAH1B3 PE=1 SV=1	Q15102		PA1B3	1317.5	1154.6	1414.65	1786.6	1847.9	1885.65
984	5405	P56537|IF6_HUMAN	275.52	26599	7	43	Eukaryotic translation initiation factor 6 OS=Homo sapiens OX=9606 GN=EIF6 PE=1 SV=1	P56537		IF6	2238.9	2027.95	1984.65	1930.55	1879.7	1963.4
1192	1236	P18858|DNLI1_HUMAN	254.27	101736	12	20	DNA ligase 1 OS=Homo sapiens OX=9606 GN=LIG1 PE=1 SV=1	P18858		DNLI1	1140.99	928.44	895.73	1205.04	1318.97	1947.35
784	2100	O00154|BACH_HUMAN	271.14	41796	12	43	Cytosolic acyl coenzyme A thioester hydrolase OS=Homo sapiens OX=9606 GN=ACOT7 PE=1 SV=3	O00154		BACH	2385.55	2213.9	2052.95	2110.6	1495.42	2011.2
1016	3703	P30519|HMOX2_HUMAN	280.82	36033	10	45	Heme oxygenase 2 OS=Homo sapiens OX=9606 GN=HMOX2 PE=1 SV=2	P30519		HMOX2	2185.6	2109	2314.45	2002.6	1927.35	1971
508	1532	P18031|PTN1_HUMAN	322.06	49967	16	44	Tyrosine-protein phosphatase non-receptor type 1 OS=Homo sapiens OX=9606 GN=PTPN1 PE=1 SV=1	P18031		PTN1	1596.7	1620.65	1826.95	2219.5	2084.6	2049.25
516	1535	Q15436|SC23A_HUMAN	321.14	86161	12	27	Protein transport protein Sec23A OS=Homo sapiens OX=9606 GN=SEC23A PE=1 SV=2	Q15436		SC23A	1623.65	1635.65	2124.35	1561.75	1830.35	1844.75
672	4337	Q9ULC4|MCTS1_HUMAN	241.79	20555	8	53	Malignant T-cell-amplified sequence 1 OS=Homo sapiens OX=9606 GN=MCTS1 PE=1 SV=1	Q9ULC4		MCTS1	2040.65	2144.6	2105.3	1796.2	1980	1949.6
491	2136	Q06323|PSME1_HUMAN	295.35	28723	13	49	Proteasome activator complex subunit 1 OS=Homo sapiens OX=9606 GN=PSME1 PE=1 SV=1	Q06323		PSME1	2384.4	2414.2	2567	2591.25	2605.25	2247.25
406	1583	O00116|ADAS_HUMAN	336.47	72912	19	34	Alkyldihydroxyacetonephosphate synthase peroxisomal OS=Homo sapiens OX=9606 GN=AGPS PE=1 SV=1	O00116		ADAS	1862	1749.75	1760.9	2236	1840.45	1950.1
803	1003	Q9H4A4|AMPB_HUMAN	276.4	72596	17	37	Aminopeptidase B OS=Homo sapiens OX=9606 GN=RNPEP PE=1 SV=2	Q9H4A4		AMPB	1238.1	495.99	1164.9	1481.1	1534	1792.75
848	2160	Q14498-3|RBM39_HUMAN	283.07	57090	10	29	Isoform 3 of RNA-binding protein 39 OS=Homo sapiens OX=9606 GN=RBM39	Q14498	3	RBM39	1667.1	1575.55	1737.1	1785.1	1411.3	1781.9
1083	6674	P11166|GTR1_HUMAN	216.88	54084	5	6	Solute carrier family 2 facilitated glucose transporter member 1 OS=Homo sapiens OX=9606 GN=SLC2A1 PE=1 SV=2	P11166		GTR1	1393.25	1496.1	2047.2	1538.7	1956.4	1918.2
1001	15018	P42677|RS27_HUMAN	188.17	9461	3	32	40S ribosomal protein S27 OS=Homo sapiens OX=9606 GN=RPS27 PE=1 SV=3	P42677		RS27	1569.55	1473.45	1751.6	1442.35	1839.8	1884.9
1164	3659	Q01650|LAT1_HUMAN	253.81	55010	7	16	Large neutral amino acids transporter small subunit 1 OS=Homo sapiens OX=9606 GN=SLC7A5 PE=1 SV=2	Q01650		LAT1	2018.65	2119	2169.15	1894.2	1993	1923.8
1534	3537	Q56VL3|OCAD2_HUMAN	190.76	16954	6	45	OCIA domain-containing protein 2 OS=Homo sapiens OX=9606 GN=OCIAD2 PE=1 SV=1	Q56VL3		OCAD2	1439.6	1289.35	1855.45	1639.55	2033.8	1830.2
689	2038	Q9NY33|DPP3_HUMAN	317.82	82589	14	34	Dipeptidyl peptidase 3 OS=Homo sapiens OX=9606 GN=DPP3 PE=1 SV=2	Q9NY33		DPP3	1200.3	1660.85	1575.5	1806.95	1322.5	1784.4
690	2509	Q6P9B6|MEAK7_HUMAN	275.11	50994	9	37	MTOR-associated protein MEAK7 OS=Homo sapiens OX=9606 GN=MEAK7 PE=1 SV=2	Q6P9B6		MEAK7	1535.3	1304.05	1253.7	1552.1	1637.8	1774.1
654	1719	P20839-7|IMDH1_HUMAN	285.97	60898	10	28	Isoform 7 of Inosine-5'-monophosphate dehydrogenase 1 OS=Homo sapiens OX=9606 GN=IMPDH1	P20839	7	IMDH1	1790.35	1632.7	1747	1656.9	1682.45	1804.75
575	1524	O43237|DC1L2_HUMAN	333.4	54099	15	41	Cytoplasmic dynein 1 light intermediate chain 2 OS=Homo sapiens OX=9606 GN=DYNC1LI2 PE=1 SV=1	O43237		DC1L2	1371.45	1596.6	1831.3	2059.4	1213.6	1882.3
1128	1675	P10644|KAP0_HUMAN	191.71	42982	8	27	cAMP-dependent protein kinase type I-alpha regulatory subunit OS=Homo sapiens OX=9606 GN=PRKAR1A PE=1 SV=1	P10644		KAP0	1133.25	894.42	1027.07	2079.45	1497.9	1774.15
477	1388	P07954-2|FUMH_HUMAN	285.69	50213	13	53	Isoform Cytoplasmic of Fumarate hydratase mitochondrial OS=Homo sapiens OX=9606 GN=FH	P07954	2	FUMH	1265.65	1318.05	1474.8	1808.6	1762.45	1836.25
593	1525	Q14157-5|UBP2L_HUMAN	304.1	116640	14	21	Isoform 5 of Ubiquitin-associated protein 2-like OS=Homo sapiens OX=9606 GN=UBAP2L	Q14157	5	UBP2L	1377.55	1134.9	1580.1	1909.35	1716.3	1854.1
410	4242	P62979|RS27A_HUMAN	252.57	17965	3	53	Ubiquitin-40S ribosomal protein S27a OS=Homo sapiens OX=9606 GN=RPS27A PE=1 SV=2	P62979		RS27A	717.69	1360.25	1179.6	1766.5	1418.4	1753.4
2068	3682	P62269|RS18_HUMAN	136.88	17719	6	35	40S ribosomal protein S18 OS=Homo sapiens OX=9606 GN=RPS18 PE=1 SV=3	P62269		RS18	839.55	1895.85	1065.45	2498.25	3579.4	1966.5
730	1952	Q9UNZ2-5|NSF1C_HUMAN	296.7	40816	13	44	Isoform 3 of NSFL1 cofactor p47 OS=Homo sapiens OX=9606 GN=NSFL1C	Q9UNZ2	5	NSF1C	1112.89	1506.05	1079.31	1758.45	1721.4	1834.4
360	275	Q13085-2|ACACA_HUMAN	383.77	259684	35	24	Isoform 2 of Acetyl-CoA carboxylase 1 OS=Homo sapiens OX=9606 GN=ACACA	Q13085	2	ACACA	1956.3	1721.5	2043.15	2474.75	2388.8	2137.35
527	871	Q9Y2W1|TR150_HUMAN	284.9	108666	14	21	Thyroid hormone receptor-associated protein 3 OS=Homo sapiens OX=9606 GN=THRAP3 PE=1 SV=2	Q9Y2W1		TR150	1578.6	1727.5	1657	2070.15	2328.85	1951.1
1280	2752	P50402|EMD_HUMAN	209.66	28994	8	43	Emerin OS=Homo sapiens OX=9606 GN=EMD PE=1 SV=1	P50402		EMD	1478.9	1664.95	1702.3	1794	1902.25	1875.9
74	729	P67936-2|TPM4_HUMAN	396.32	32723	6	74	Isoform 2 of Tropomyosin alpha-4 chain OS=Homo sapiens OX=9606 GN=TPM4	P67936	2	TPM4	1877.7	1691.05	1486.75	1920.2	1806.15	1863.4
934	3037	O95292|VAPB_HUMAN	227.57	27228	7	44	Vesicle-associated membrane protein-associated protein B/C OS=Homo sapiens OX=9606 GN=VAPB PE=1 SV=3	O95292		VAPB	1484.75	1406.35	1538.3	1754	1707.05	1783.2
1204	5683	P50502|F10A1_HUMAN	204.89	41332	5	15	Hsc70-interacting protein OS=Homo sapiens OX=9606 GN=ST13 PE=1 SV=2	P50502		F10A1	1560.85	939.77	1335.45	1779.6	1832.6	1848.25
419	1990	P62081|RS7_HUMAN	299.44	22127	11	55	40S ribosomal protein S7 OS=Homo sapiens OX=9606 GN=RPS7 PE=1 SV=1	P62081		RS7	2143.7	1934.2	1520.15	1518.05	1824.25	1775.5
1044	1566	Q9BUJ2-2|HNRL1_HUMAN	275.57	90292	13	20	Isoform 2 of Heterogeneous nuclear ribonucleoprotein U-like protein 1 OS=Homo sapiens OX=9606 GN=HNRNPUL1	Q9BUJ2	2	HNRL1	1541.3	1564.35	1461.65	1660.1	1612	1731.7
637	1371	P50552|VASP_HUMAN	270.87	39830	12	42	Vasodilator-stimulated phosphoprotein OS=Homo sapiens OX=9606 GN=VASP PE=1 SV=3	P50552		VASP	2441.6	2727.3	2599.85	1953.3	1790.6	1892.85
819	751	Q13263|TIF1B_HUMAN	330.18	88550	26	52	Transcription intermediary factor 1-beta OS=Homo sapiens OX=9606 GN=TRIM28 PE=1 SV=5	Q13263		TIF1B	1304.1	1829.75	1182.2	1904.75	1464.8	1828.1
656	2749	O15372|EIF3H_HUMAN	319.15	39930	12	53	Eukaryotic translation initiation factor 3 subunit H OS=Homo sapiens OX=9606 GN=EIF3H PE=1 SV=1	O15372		EIF3H	2393.65	1794.55	1807.95	1335.2	1622.15	1722.2
1131	3674	P45973|CBX5_HUMAN	243.07	22225	7	43	Chromobox protein homolog 5 OS=Homo sapiens OX=9606 GN=CBX5 PE=1 SV=1	P45973		CBX5	1405.05	1327.35	1053.33	1459.45	1892.25	1825.1
833	4065	P29373|RABP2_HUMAN	269.13	15693	8	57	Cellular retinoic acid-binding protein 2 OS=Homo sapiens OX=9606 GN=CRABP2 PE=1 SV=2	P29373		RABP2	1536.1	1667.85	1763.7	1872.45	1731.7	1817.9
1126	3986	P31942|HNRH3_HUMAN	207.81	36926	5	32	Heterogeneous nuclear ribonucleoprotein H3 OS=Homo sapiens OX=9606 GN=HNRNPH3 PE=1 SV=2	P31942		HNRH3	1483.23	1192.27	1871.1	3119.6	822.03	1816.3
1048	7082	P61970|NTF2_HUMAN	173.99	14478	3	52	Nuclear transport factor 2 OS=Homo sapiens OX=9606 GN=NUTF2 PE=1 SV=1	P61970		NTF2	1108.45	1069.45	1140.15	1637.75	1765.5	1754.55
1361	10265	P67812-4|SC11A_HUMAN	168.31	18988	4	23	Isoform 4 of Signal peptidase complex catalytic subunit SEC11A OS=Homo sapiens OX=9606 GN=SEC11A	P67812	4	SC11A	1398.95	1327.15	1529.1	1707.7	1563.85	1755.95
541	423	O95347-2|SMC2_HUMAN	296.38	124926	22	26	Isoform 2 of Structural maintenance of chromosomes protein 2 OS=Homo sapiens OX=9606 GN=SMC2	O95347	2	SMC2	1387.35	1253.85	1157.69	1716.85	1985.65	1765.15
1194	1426	Q8TC12-2|RDH11_HUMAN	262.3	34004	12	68	Isoform 2 of Retinol dehydrogenase 11 OS=Homo sapiens OX=9606 GN=RDH11	Q8TC12	2	RDH11	939.66	909.59	846.45	1137.15	1046	1425.15
698	2690	P30566|PUR8_HUMAN	262.25	54889	10	34	Adenylosuccinate lyase OS=Homo sapiens OX=9606 GN=ADSL PE=1 SV=2	P30566		PUR8	1482	721.68	927.43	1444.8	1389.45	1658.4
358	385	A5YKK6|CNOT1_HUMAN	379.45	266937	28	18	CCR4-NOT transcription complex subunit 1 OS=Homo sapiens OX=9606 GN=CNOT1 PE=1 SV=2	A5YKK6		CNOT1	1188.05	1123.75	1090.56	1418.95	1462.85	1605.8
522	563	P26196|DDX6_HUMAN	347.17	54417	16	58	Probable ATP-dependent RNA helicase DDX6 OS=Homo sapiens OX=9606 GN=DDX6 PE=1 SV=2	P26196		DDX6	1465	1419.75	1511.7	1921.8	1668.75	1787.6
434	609	O94979-6|SC31A_HUMAN	360.91	117673	23	30	Isoform 6 of Protein transport protein Sec31A OS=Homo sapiens OX=9606 GN=SEC31A	O94979	6	SC31A	1254.15	1739.05	1366.95	1671.45	1695.95	1778.95
716	3688	P35637-2|FUS_HUMAN	262.21	53355	8	23	Isoform Short of RNA-binding protein FUS OS=Homo sapiens OX=9606 GN=FUS	P35637	2	FUS	2308.8	2062.65	2011.25	1416.55	1751.7	1757.95
470	187	Q93009-3|UBP7_HUMAN	346.13	126269	23	31	Isoform 3 of Ubiquitin carboxyl-terminal hydrolase 7 OS=Homo sapiens OX=9606 GN=USP7	Q93009	3	UBP7	878.69	1500	1556.55	1500.55	1454.05	1681.4
431	420	Q14258|TRI25_HUMAN	345.37	70974	20	44	E3 ubiquitin/ISG15 ligase TRIM25 OS=Homo sapiens OX=9606 GN=TRIM25 PE=1 SV=2	Q14258		TRI25	2966.65	2592.9	4587.9	1909.2	1592.67	1782.7
695	1023	P45974-2|UBP5_HUMAN	318.88	93308	18	42	Isoform Short of Ubiquitin carboxyl-terminal hydrolase 5 OS=Homo sapiens OX=9606 GN=USP5	P45974	2	UBP5	949.1	884.27	1289.15	1166.77	2311.3	1681.4
1065	2141	O60664-4|PLIN3_HUMAN	261.32	45804	13	45	Isoform 4 of Perilipin-3 OS=Homo sapiens OX=9606 GN=PLIN3	O60664	4	PLIN3	1549.85	1178.22	1454.05	1220.08	1220.99	1648.3
675	1200	Q9UN86-2|G3BP2_HUMAN	316	50817	9	34	Isoform B of Ras GTPase-activating protein-binding protein 2 OS=Homo sapiens OX=9606 GN=G3BP2	Q9UN86	2	G3BP2	1373.55	1367.9	1203.23	1347.95	1064.62	1515.75
597	1932	Q14192|FHL2_HUMAN	261.75	32193	11	44	Four and a half LIM domains protein 2 OS=Homo sapiens OX=9606 GN=FHL2 PE=1 SV=3	Q14192		FHL2	2007.5	1920.15	1977.5	1609.05	1587.85	1765.8
351	132	Q9UHB6|LIMA1_HUMAN	377.73	85226	30	46	LIM domain and actin-binding protein 1 OS=Homo sapiens OX=9606 GN=LIMA1 PE=1 SV=1	Q9UHB6		LIMA1	2532.5	2321.95	3193.65	3487.6	2073.3	1906.05
825	2838	P50897|PPT1_HUMAN	255.02	34193	10	40	Palmitoyl-protein thioesterase 1 OS=Homo sapiens OX=9606 GN=PPT1 PE=1 SV=1	P50897		PPT1	757.95	636.55	735.26	1561.4	1183.05	1641.35
549	686	Q70J99|UN13D_HUMAN	347.51	123282	16	23	Protein unc-13 homolog D OS=Homo sapiens OX=9606 GN=UNC13D PE=1 SV=1	Q70J99		UN13D	1894.95	1760.2	1357.1	2049.65	2199.75	1950.7
1341	3816	P39019|RS19_HUMAN	160.64	16060	5	40	40S ribosomal protein S19 OS=Homo sapiens OX=9606 GN=RPS19 PE=1 SV=2	P39019		RS19	3220.95	2854.1	2883	2168.45	1772.9	1756.7
590	2252	Q12904-2|AIMP1_HUMAN	262.81	37039	11	54	Isoform 2 of Aminoacyl tRNA synthase complex-interacting multifunctional protein 1 OS=Homo sapiens OX=9606 GN=AIMP1	Q12904	2	AIMP1	1601.05	1659.95	1792.05	1572.85	1760	1725.45
347	127	Q9Y4L1|HYOU1_HUMAN	380.88	111335	33	47	Hypoxia up-regulated protein 1 OS=Homo sapiens OX=9606 GN=HYOU1 PE=1 SV=1	Q9Y4L1		HYOU1	5643.95	5848.7	3480.75	1761.9	2416.85	1782.6
1141	4240	Q96C19|EFHD2_HUMAN	201.66	26697	9	32	EF-hand domain-containing protein D2 OS=Homo sapiens OX=9606 GN=EFHD2 PE=1 SV=1	Q96C19		EFHD2	953.5	596.71	722.18	1476.6	798.03	1512.75
1014	814	Q8NBJ5|GT251_HUMAN	268.95	71636	14	32	Procollagen galactosyltransferase 1 OS=Homo sapiens OX=9606 GN=COLGALT1 PE=1 SV=1	Q8NBJ5		GT251	975.38	935.65	833.74	1550.4	968.26	1498
408	646	Q9P2J5-2|SYLC_HUMAN	345.76	128038	29	35	Isoform 2 of Leucine--tRNA ligase cytoplasmic OS=Homo sapiens OX=9606 GN=LARS1	Q9P2J5	2	SYLC	1564.7	1623.85	1568.45	1806.2	1732.2	1756.85
1334	3019	Q16831|UPP1_HUMAN	245.54	33934	6	28	Uridine phosphorylase 1 OS=Homo sapiens OX=9606 GN=UPP1 PE=1 SV=1	Q16831		UPP1	5113.1	4367.6	4810	1596.9	1048.39	1661.65
629	1354	Q9Y617|SERC_HUMAN	307.53	40423	17	56	Phosphoserine aminotransferase OS=Homo sapiens OX=9606 GN=PSAT1 PE=1 SV=2	Q9Y617		SERC	2306.25	2461.9	2244.35	1841.75	1894.55	1735.1
717	997	P08670|VIME_HUMAN	276.41	53652	15	46	Vimentin OS=Homo sapiens OX=9606 GN=VIM PE=1 SV=4	P08670		VIME	684.06	749.77	884.34	1416.15	1046.75	1418.2
490	1740	P52907|CAZA1_HUMAN	294.44	32923	12	67	F-actin-capping protein subunit alpha-1 OS=Homo sapiens OX=9606 GN=CAPZA1 PE=1 SV=3	P52907		CAZA1	1249.45	1338.12	973.99	730.13	1197.12	1347.42
216	1044	Q14103-3|HNRPD_HUMAN	379.94	32835	4	50	Isoform 3 of Heterogeneous nuclear ribonucleoprotein D0 OS=Homo sapiens OX=9606 GN=HNRNPD	Q14103	3	HNRPD	2089.2	1332.3	1709.4	1799.2	1038.77	1646.5
604	2414	P61106|RAB14_HUMAN	316.1	23897	13	74	Ras-related protein Rab-14 OS=Homo sapiens OX=9606 GN=RAB14 PE=1 SV=4	P61106		RAB14	1897.5	2124.9	2023.7	1576.8	1521.95	1711
949	1929	P50213|IDH3A_HUMAN	251.78	39592	10	33	Isocitrate dehydrogenase [NAD] subunit alpha mitochondrial OS=Homo sapiens OX=9606 GN=IDH3A PE=1 SV=1	P50213		IDH3A	1070.44	839.05	866.12	1366.8	1685.3	1668.05
828	3558	P08865|RSSA_HUMAN	282.27	32854	14	51	40S ribosomal protein SA OS=Homo sapiens OX=9606 GN=RPSA PE=1 SV=4	P08865		RSSA	1463.15	1408.25	1460.95	1548.45	1709.5	1684.5
1336	4648	P53007|TXTP_HUMAN	183.36	34013	5	23	Tricarboxylate transport protein mitochondrial OS=Homo sapiens OX=9606 GN=SLC25A1 PE=1 SV=2	P53007		TXTP	1052.05	1038.9	1156.3	1668.5	1618.2	1682.35
544	857	Q9BXP5-2|SRRT_HUMAN	313.96	100276	21	27	Isoform 2 of Serrate RNA effector molecule homolog OS=Homo sapiens OX=9606 GN=SRRT	Q9BXP5	2	SRRT	1562.2	1485.75	1680.55	1914.65	1780.9	1774.3
569	555	Q03252|LMNB2_HUMAN	270.27	69948	17	40	Lamin-B2 OS=Homo sapiens OX=9606 GN=LMNB2 PE=1 SV=4	Q03252		LMNB2	1855.9	1936.35	1876.9	2121.05	2156.7	1900.65
1324	3262	Q13155|AIMP2_HUMAN	233.44	35349	10	53	Aminoacyl tRNA synthase complex-interacting multifunctional protein 2 OS=Homo sapiens OX=9606 GN=AIMP2 PE=1 SV=2	Q13155		AIMP2	1247.8	1289.12	1314.4	1322.4	1382.45	1558.65
789	1842	Q9UNM6|PSD13_HUMAN	274.21	42946	14	50	26S proteasome non-ATPase regulatory subunit 13 OS=Homo sapiens OX=9606 GN=PSMD13 PE=1 SV=2	Q9UNM6		PSD13	1106.8	1134.5	1376.3	1751.85	1434.5	1681.55
471	496	Q99613|EIF3C_HUMAN	324.17	105344	25	32	Eukaryotic translation initiation factor 3 subunit C OS=Homo sapiens OX=9606 GN=EIF3C PE=1 SV=1	Q99613		EIF3C	1314.5	1300.35	1185.94	1634.45	1586.95	1663.1
1074	1099	Q02818|NUCB1_HUMAN	263.23	53879	14	46	Nucleobindin-1 OS=Homo sapiens OX=9606 GN=NUCB1 PE=1 SV=4	Q02818		NUCB1	126.19	178.15	157.34	1897	1594.2	1724.4
703	1612	P49257|LMAN1_HUMAN	299.03	57549	14	36	Protein ERGIC-53 OS=Homo sapiens OX=9606 GN=LMAN1 PE=1 SV=2	P49257		LMAN1	1567.75	1930.85	2133.3	2287.1	1264.11	1651
39	43	P07437|TBB5_HUMAN	458	49671	5	81	Tubulin beta chain OS=Homo sapiens OX=9606 GN=TUBB PE=1 SV=2	P07437		TBB5	2792.3	3563.45	3072.4	3224.75	3206.6	2409.4
1364	1850	P28370|SMCA1_HUMAN	206.66	122605	4	10	Probable global transcription activator SNF2L1 OS=Homo sapiens OX=9606 GN=SMARCA1 PE=1 SV=2	P28370		SMCA1	0	549.35	673.1	1488.7	1483.85	1569.55
293	1809	Q01105|SET_HUMAN	345.49	33489	5	50	Protein SET OS=Homo sapiens OX=9606 GN=SET PE=1 SV=3	Q01105		SET	978.67	848.72	969.38	1205.65	1063.1	1374.45
1242	5644	P61513|RL37A_HUMAN	194.92	10275	4	43	60S ribosomal protein L37a OS=Homo sapiens OX=9606 GN=RPL37A PE=1 SV=2	P61513		RL37A	1502.29	1741.35	1445.2	1994.6	1704.6	1789.2
779	4981	Q9BRA2|TXD17_HUMAN	243.06	13941	6	58	Thioredoxin domain-containing protein 17 OS=Homo sapiens OX=9606 GN=TXNDC17 PE=1 SV=1	Q9BRA2		TXD17	1527.3	1917.3	1904.95	2233.55	1962.15	1870.25
1104	2909	P78346|RPP30_HUMAN	261.37	29321	6	37	Ribonuclease P protein subunit p30 OS=Homo sapiens OX=9606 GN=RPP30 PE=1 SV=1	P78346		RPP30	1511.65	2436.05	2005.75	2516.9	1692.2	1700.35
323	397	Q5T4S7-2|UBR4_HUMAN	388.3	575966	41	14	Isoform 2 of E3 ubiquitin-protein ligase UBR4 OS=Homo sapiens OX=9606 GN=UBR4	Q5T4S7	2	UBR4	1392.6	1426.65	1223.65	1893.25	1114.97	1629.3
1421	1792	P23743|DGKA_HUMAN	247.17	82630	12	28	Diacylglycerol kinase alpha OS=Homo sapiens OX=9606 GN=DGKA PE=1 SV=3	P23743		DGKA	234.66	107.99	229.16	869.95	529.43	1108.56
1037	3464	P13804|ETFA_HUMAN	238.53	35080	10	46	Electron transfer flavoprotein subunit alpha mitochondrial OS=Homo sapiens OX=9606 GN=ETFA PE=1 SV=1	P13804		ETFA	1074.54	1233	953.74	1530.95	1561.25	1624.2
447	1614	P38919|IF4A3_HUMAN	324.24	46871	13	43	Eukaryotic initiation factor 4A-III OS=Homo sapiens OX=9606 GN=EIF4A3 PE=1 SV=4	P38919		IF4A3	2325.05	1857.05	2178.55	1669.3	1750.3	1609
853	3133	Q16629|SRSF7_HUMAN	222.89	27367	8	34	Serine/arginine-rich splicing factor 7 OS=Homo sapiens OX=9606 GN=SRSF7 PE=1 SV=1	Q16629		SRSF7	2442.4	2519.7	3345.6	2274.8	1957.25	1705.85
4261	16721	Q9UQN3|CHM2B_HUMAN	55.92	23907	1	5	Charged multivesicular body protein 2b OS=Homo sapiens OX=9606 GN=CHMP2B PE=1 SV=1	Q9UQN3		CHM2B	0	0	0	0	0	799.85
2169	12530	Q8NI22|MCFD2_HUMAN	122.45	16390	2	36	Multiple coagulation factor deficiency protein 2 OS=Homo sapiens OX=9606 GN=MCFD2 PE=1 SV=1	Q8NI22		MCFD2	816.32	909.06	1015.04	1402.9	1485.4	1546
1133	4229	O00487|PSDE_HUMAN	226.76	34577	5	31	26S proteasome non-ATPase regulatory subunit 14 OS=Homo sapiens OX=9606 GN=PSMD14 PE=1 SV=1	O00487		PSDE	1566.3	1532.8	1605.05	1565.05	1586.95	1597.8
1212	3605	Q9UJZ1|STML2_HUMAN	260.67	38534	9	45	Stomatin-like protein 2 mitochondrial OS=Homo sapiens OX=9606 GN=STOML2 PE=1 SV=1	Q9UJZ1		STML2	1258.82	1040.4	1002.82	809.65	1142.26	1302.1
771	5173	P49773|HINT1_HUMAN	251.3	13802	6	71	Histidine triad nucleotide-binding protein 1 OS=Homo sapiens OX=9606 GN=HINT1 PE=1 SV=2	P49773		HINT1	1282.87	1221.03	1258.2	1693.8	1483.3	1592.9
968	1832	P50416|CPT1A_HUMAN	240.36	88368	10	19	Carnitine O-palmitoyltransferase 1 liver isoform OS=Homo sapiens OX=9606 GN=CPT1A PE=1 SV=2	P50416		CPT1A	1419.8	1157.65	1314.35	1191.4	1314.5	1405.05
787	985	P02786|TFR1_HUMAN	282.01	84871	16	31	Transferrin receptor protein 1 OS=Homo sapiens OX=9606 GN=TFRC PE=1 SV=2	P02786		TFR1	1394.7	1282.45	1319.95	1173.91	1542.7	1486.75
873	2298	P35237|SPB6_HUMAN	264.66	42622	12	41	Serpin B6 OS=Homo sapiens OX=9606 GN=SERPINB6 PE=1 SV=3	P35237		SPB6	1862.35	1791.9	2021.65	1703.1	1606.7	1584.2
1040	1961	Q96CS3|FAF2_HUMAN	239.91	52624	11	39	FAS-associated factor 2 OS=Homo sapiens OX=9606 GN=FAF2 PE=1 SV=2	Q96CS3		FAF2	754.74	975.74	1225.45	1401.5	1197.2	1487.15
625	877	Q04446|GLGB_HUMAN	320.99	80474	16	36	1 4-alpha-glucan-branching enzyme OS=Homo sapiens OX=9606 GN=GBE1 PE=1 SV=3	Q04446		GLGB	1680.5	1382.1	1331.55	1848.95	1761	1587.4
343	702	P17844|DDX5_HUMAN	369.99	69148	19	48	Probable ATP-dependent RNA helicase DDX5 OS=Homo sapiens OX=9606 GN=DDX5 PE=1 SV=1	P17844		DDX5	2495.2	3349.9	3309.15	3904.05	4106.85	2595.9
683	2359	P31689|DNJA1_HUMAN	285.03	44868	14	40	DnaJ homolog subfamily A member 1 OS=Homo sapiens OX=9606 GN=DNAJA1 PE=1 SV=2	P31689		DNJA1	1401.75	1805.8	1654.3	1968.6	1399.55	1574.1
2727	4382	P52701|MSH6_HUMAN	144.42	152785	5	5	DNA mismatch repair protein Msh6 OS=Homo sapiens OX=9606 GN=MSH6 PE=1 SV=2	P52701		MSH6	820.46	47.59	23.68	100.8	94.11	844.9
543	628	Q86W92-4|LIPB1_HUMAN	314.07	110297	23	28	Isoform 4 of Liprin-beta-1 OS=Homo sapiens OX=9606 GN=PPFIBP1	Q86W92	4	LIPB1	641.93	597.55	616.09	1669.75	1230.95	1571.4
687	954	O60825-2|F262_HUMAN	269.85	54406	15	34	Isoform 2 of 6-phosphofructo-2-kinase/fructose-2 6-bisphosphatase 2 OS=Homo sapiens OX=9606 GN=PFKFB2	O60825	2	F262	1340.35	1494.5	1168.33	1095.79	1231.1	1392.85
674	885	P78347-2|GTF2I_HUMAN	307.12	107970	20	28	Isoform 2 of General transcription factor II-I OS=Homo sapiens OX=9606 GN=GTF2I	P78347	2	GTF2I	955.65	890.85	1005.3	1475.15	1639.55	1554.75
482	429	O60841|IF2P_HUMAN	346.26	138827	22	25	Eukaryotic translation initiation factor 5B OS=Homo sapiens OX=9606 GN=EIF5B PE=1 SV=4	O60841		IF2P	1953.8	1538.9	1735.25	1132.65	1262.5	1381.05
770	2167	O75367-3|H2AY_HUMAN	295.7	39489	11	37	Isoform 3 of Core histone macro-H2A.1 OS=Homo sapiens OX=9606 GN=MACROH2A1	O75367	3	H2AY	2284.9	2298.25	1804	2239.3	2544.4	1950.65
952	2582	Q06124|PTN11_HUMAN	241.11	68011	10	24	Tyrosine-protein phosphatase non-receptor type 11 OS=Homo sapiens OX=9606 GN=PTPN11 PE=1 SV=3	Q06124		PTN11	934.62	893.98	913.64	1278.7	1100.52	1397.4
1061	2507	Q13151|ROA0_HUMAN	289.22	30841	11	47	Heterogeneous nuclear ribonucleoprotein A0 OS=Homo sapiens OX=9606 GN=HNRNPA0 PE=1 SV=1	Q13151		ROA0	1330.2	1712.75	1203.3	1587.45	1733	1588.45
614	1753	Q02750|MP2K1_HUMAN	270.58	43439	7	49	Dual specificity mitogen-activated protein kinase kinase 1 OS=Homo sapiens OX=9606 GN=MAP2K1 PE=1 SV=2	Q02750		MP2K1	661.35	908.51	773.18	1221.8	1168.9	1401.15
692	1766	P62195|PRS8_HUMAN	287.34	45626	17	46	26S proteasome regulatory subunit 8 OS=Homo sapiens OX=9606 GN=PSMC5 PE=1 SV=1	P62195		PRS8	1753.85	1197.65	1544	1607.9	1690.95	1544.2
836	570	Q9Y263|PLAP_HUMAN	314.16	87157	17	30	Phospholipase A-2-activating protein OS=Homo sapiens OX=9606 GN=PLAA PE=1 SV=2	Q9Y263		PLAP	1063.9	983.43	885.54	949.52	1154.05	1285.6
562	1449	O95202|LETM1_HUMAN	331.69	83354	16	34	Mitochondrial proton/calcium exchanger protein OS=Homo sapiens OX=9606 GN=LETM1 PE=1 SV=1	O95202		LETM1	1219.5	1123.05	1253.65	1673.45	1512.95	1538.7
832	1093	Q7Z2K6|ERMP1_HUMAN	262.14	100231	14	27	Endoplasmic reticulum metallopeptidase 1 OS=Homo sapiens OX=9606 GN=ERMP1 PE=1 SV=2	Q7Z2K6		ERMP1	658.9	354.25	632.15	1114.6	1038.83	1342.15
912	759	Q16891-2|MIC60_HUMAN	315.38	82625	20	32	Isoform 2 of MICOS complex subunit MIC60 OS=Homo sapiens OX=9606 GN=IMMT	Q16891	2	MIC60	914.48	676.72	396.3	966.47	792.57	1236.57
577	2172	P18754-2|RCC1_HUMAN	307.42	48146	11	48	Isoform 2 of Regulator of chromosome condensation OS=Homo sapiens OX=9606 GN=RCC1	P18754	2	RCC1	1801.25	2583.45	1721.85	2690.5	1763.35	1736.1
989	2897	Q9P035|HACD3_HUMAN	224.35	43160	7	26	Very-long-chain (3R)-3-hydroxyacyl-CoA dehydratase 3 OS=Homo sapiens OX=9606 GN=HACD3 PE=1 SV=2	Q9P035		HACD3	576.9	515.86	546.09	805.52	1161.57	1210.01
280	123	Q13620-1|CUL4B_HUMAN	372.45	102299	24	41	Isoform 2 of Cullin-4B OS=Homo sapiens OX=9606 GN=CUL4B	Q13620	1	CUL4B	871.69	1024.35	938.42	1252.2	1318.25	1422.5
769	1416	P22059|OSBP1_HUMAN	260.19	89421	12	22	Oxysterol-binding protein 1 OS=Homo sapiens OX=9606 GN=OSBP PE=1 SV=1	P22059		OSBP1	1653.15	1726.35	1738.7	1384.6	1543.1	1517.1
421	1633	P13489|RINI_HUMAN	321.81	49974	13	48	Ribonuclease inhibitor OS=Homo sapiens OX=9606 GN=RNH1 PE=1 SV=2	P13489		RINI	1557.9	1494.5	1186.85	1434.3	1555.9	1493.85
437	180	Q14008|CKAP5_HUMAN	385.99	225493	31	24	Cytoskeleton-associated protein 5 OS=Homo sapiens OX=9606 GN=CKAP5 PE=1 SV=3	Q14008		CKAP5	1119.35	1332.3	1208.05	1546.8	1085.93	1450.25
571	3158	P68036|UB2L3_HUMAN	259.96	17862	9	70	Ubiquitin-conjugating enzyme E2 L3 OS=Homo sapiens OX=9606 GN=UBE2L3 PE=1 SV=1	P68036		UB2L3	1472.9	1486.05	1391.5	1639	1471.25	1511.3
561	1973	O00151|PDLI1_HUMAN	297.78	36072	16	74	PDZ and LIM domain protein 1 OS=Homo sapiens OX=9606 GN=PDLIM1 PE=1 SV=4	O00151		PDLI1	2197.15	1724.5	1407.65	1102.46	1406.45	1475.8
1149	5566	P30085|KCY_HUMAN	207.27	22222	8	37	UMP-CMP kinase OS=Homo sapiens OX=9606 GN=CMPK1 PE=1 SV=3	P30085		KCY	1129.25	1088.75	1590.9	1503.85	1103.39	1495.05
1388	4752	P33316-2|DUT_HUMAN	218.38	17748	8	60	Isoform 2 of Deoxyuridine 5'-triphosphate nucleotidohydrolase mitochondrial OS=Homo sapiens OX=9606 GN=DUT	P33316	2	DUT	1155.97	1396.5	1380.2	1657.3	886.27	1507.7
761	1423	P28838|AMPL_HUMAN	271.45	56166	11	30	Cytosol aminopeptidase OS=Homo sapiens OX=9606 GN=LAP3 PE=1 SV=3	P28838		AMPL	1316.55	1224.1	1177.5	1233.4	1323	1391.9
1461	5494	O00303|EIF3F_HUMAN	265.52	37564	8	29	Eukaryotic translation initiation factor 3 subunit F OS=Homo sapiens OX=9606 GN=EIF3F PE=1 SV=1	O00303		EIF3F	1698.8	2069.93	1946.9	2378.1	1486.8	1500.75
1775	3938	Q07955|SRSF1_HUMAN	192.82	27745	6	27	Serine/arginine-rich splicing factor 1 OS=Homo sapiens OX=9606 GN=SRSF1 PE=1 SV=2	Q07955		SRSF1	1633	1568.4	1051.85	1112.33	1435.9	1427.95
1127	1671	Q9NVP1|DDX18_HUMAN	257.27	75407	11	25	ATP-dependent RNA helicase DDX18 OS=Homo sapiens OX=9606 GN=DDX18 PE=1 SV=2	Q9NVP1		DDX18	838.65	707.43	1015.1	941.76	1030.79	1334.75
512	808	P30876|RPB2_HUMAN	327.89	133896	17	19	DNA-directed RNA polymerase II subunit RPB2 OS=Homo sapiens OX=9606 GN=POLR2B PE=1 SV=1	P30876		RPB2	819.28	709.36	776.31	1180.25	1034.11	1286.1
1550	15273	O14561|ACPM_HUMAN	178.78	17417	5	24	Acyl carrier protein mitochondrial OS=Homo sapiens OX=9606 GN=NDUFAB1 PE=1 SV=3	O14561		ACPM	562.05	562.73	520.07	1393.55	1554.05	1493.6
1352	6082	Q99538|LGMN_HUMAN	203.34	49411	5	22	Legumain OS=Homo sapiens OX=9606 GN=LGMN PE=1 SV=1	Q99538		LGMN	903.28	685.99	845.24	1200.1	1446.1	1452.7
645	1325	Q15459|SF3A1_HUMAN	293.07	88886	17	27	Splicing factor 3A subunit 1 OS=Homo sapiens OX=9606 GN=SF3A1 PE=1 SV=1	Q15459		SF3A1	1461.55	1266.2	1042.45	1758.25	1535.15	1515.5
813	1632	Q9BT78|CSN4_HUMAN	280.1	46269	13	47	COP9 signalosome complex subunit 4 OS=Homo sapiens OX=9606 GN=COPS4 PE=1 SV=1	Q9BT78		CSN4	1035.74	1146.66	1147.58	1228.05	1176.1	1333.2
474	283	Q8WWI1-3|LMO7_HUMAN	335.08	153670	27	24	Isoform 3 of LIM domain only protein 7 OS=Homo sapiens OX=9606 GN=LMO7	Q8WWI1	3	LMO7	1205.55	1226	1274.8	1593.8	1378.56	1540.55
1103	3279	Q15056-2|IF4H_HUMAN	199.56	25200	7	44	Isoform Short of Eukaryotic translation initiation factor 4H OS=Homo sapiens OX=9606 GN=EIF4H	Q15056	2	IF4H	1894.75	1640.95	2271	1540.95	1375.4	1485.4
1999	8531	P20674|COX5A_HUMAN	151.75	16762	3	18	Cytochrome c oxidase subunit 5A mitochondrial OS=Homo sapiens OX=9606 GN=COX5A PE=1 SV=2	P20674		COX5A	696.23	526.69	339.83	1440.75	1487.1	1479.7
567	102	Q86V48|LUZP1_HUMAN	315.4	120275	22	29	Leucine zipper protein 1 OS=Homo sapiens OX=9606 GN=LUZP1 PE=1 SV=2	Q86V48		LUZP1	1137.25	1176	1116.8	1130.61	969.3	1275.25
720	2367	P14550|AK1A1_HUMAN	286.46	36573	10	50	Aldo-keto reductase family 1 member A1 OS=Homo sapiens OX=9606 GN=AKR1A1 PE=1 SV=3	P14550		AK1A1	1446.12	1661.85	1677	758.87	1516.8	1418
775	1180	Q9Y3I0|RTCB_HUMAN	292.72	55210	13	38	RNA-splicing ligase RtcB homolog OS=Homo sapiens OX=9606 GN=RTCB PE=1 SV=1	Q9Y3I0		RTCB	1216.85	642.91	1325.3	957.28	1414.25	1438.6
1269	5290	Q15121|PEA15_HUMAN	211.43	15040	4	37	Astrocytic phosphoprotein PEA-15 OS=Homo sapiens OX=9606 GN=PEA15 PE=1 SV=2	Q15121		PEA15	988.37	981.18	706.11	1083.68	1417.75	1437.45
1022	5433	P35613-2|BASI_HUMAN	229.86	29221	5	25	Isoform 2 of Basigin OS=Homo sapiens OX=9606 GN=BSG	P35613	2	BASI	1054.92	1208.75	1044.3	1061.96	1276.75	1339.3
589	1155	Q15654|TRIP6_HUMAN	334.26	50288	15	63	Thyroid receptor-interacting protein 6 OS=Homo sapiens OX=9606 GN=TRIP6 PE=1 SV=3	Q15654		TRIP6	1705.25	1350.75	1683.15	1462.15	1632.35	1498.9
418	325	Q9C0C2|TB182_HUMAN	350.92	181795	24	25	182 kDa tankyrase-1-binding protein OS=Homo sapiens OX=9606 GN=TNKS1BP1 PE=1 SV=4	Q9C0C2		TB182	1256.35	1237.25	1266.65	1470.8	1403.75	1442.95
679	801	Q9H0A0|NAT10_HUMAN	314.23	115730	22	31	RNA cytidine acetyltransferase OS=Homo sapiens OX=9606 GN=NAT10 PE=1 SV=2	Q9H0A0		NAT10	1082.51	1025.86	791.08	1148	1281.8	1316.9
1144	3665	O00264|PGRC1_HUMAN	240.78	21671	10	55	Membrane-associated progesterone receptor component 1 OS=Homo sapiens OX=9606 GN=PGRMC1 PE=1 SV=3	O00264		PGRC1	955.67	709.76	928.98	1178.23	1465.25	1456.25
582	2773	P04899|GNAI2_HUMAN	282.98	40451	8	46	Guanine nucleotide-binding protein G(i) subunit alpha-2 OS=Homo sapiens OX=9606 GN=GNAI2 PE=1 SV=3	P04899		GNAI2	1139.15	1371.05	1083.59	1528.25	1491.95	1446.5
1285	2974	P48047|ATPO_HUMAN	219.94	23277	5	38	ATP synthase subunit O mitochondrial OS=Homo sapiens OX=9606 GN=ATP5PO PE=1 SV=1	P48047		ATPO	1157.65	917.26	713.38	1648.25	1484.55	1464.35
1598	4431	O96008|TOM40_HUMAN	205.96	37893	7	40	Mitochondrial import receptor subunit TOM40 homolog OS=Homo sapiens OX=9606 GN=TOMM40 PE=1 SV=1	O96008		TOM40	526.1	775.8	294.34	760.1	737.26	1122.61
513	481	Q92974-2|ARHG2_HUMAN	330.75	111471	20	32	Isoform 2 of Rho guanine nucleotide exchange factor 2 OS=Homo sapiens OX=9606 GN=ARHGEF2	Q92974	2	ARHG2	2604.55	2599.6	2656.6	1396.6	1087.85	1416.4
1166	2132	Q5SSJ5|HP1B3_HUMAN	259.75	61207	13	25	Heterochromatin protein 1-binding protein 3 OS=Homo sapiens OX=9606 GN=HP1BP3 PE=1 SV=1	Q5SSJ5		HP1B3	939.08	1106.5	1011.73	1350.65	1419.25	1434.1
677	1397	A1L0T0|HACL2_HUMAN	318.08	67868	15	31	2-hydroxyacyl-CoA lyase 2 OS=Homo sapiens OX=9606 GN=ILVBL PE=1 SV=2	A1L0T0		HACL2	1595.9	1561.25	1478.85	1506.35	1689.85	1481.4
429	409	Q05682-5|CALD1_HUMAN	304.58	61213	24	47	Isoform 5 of Caldesmon OS=Homo sapiens OX=9606 GN=CALD1	Q05682	5	CALD1	2010.6	1881.65	1347.98	1701.6	1247.72	1486.1
545	1594	Q15738|NSDHL_HUMAN	325.58	41900	16	64	Sterol-4-alpha-carboxylate 3-dehydrogenase decarboxylating OS=Homo sapiens OX=9606 GN=NSDHL PE=1 SV=2	Q15738		NSDHL	1169.65	1223.1	1473.55	1372.45	1279.3	1417.5
756	817	P46063|RECQ1_HUMAN	321.49	73457	15	30	ATP-dependent DNA helicase Q1 OS=Homo sapiens OX=9606 GN=RECQL PE=1 SV=3	P46063		RECQ1	1075.21	1906.25	2017.1	1887.8	1067.34	1434.2
842	3193	Q00534|CDK6_HUMAN	252.27	36938	7	33	Cyclin-dependent kinase 6 OS=Homo sapiens OX=9606 GN=CDK6 PE=1 SV=1	Q00534		CDK6	1460.65	1116.44	1404.7	1509.55	1429.45	1433
1440	4489	P54727|RD23B_HUMAN	213.62	43171	8	30	UV excision repair protein RAD23 homolog B OS=Homo sapiens OX=9606 GN=RAD23B PE=1 SV=1	P54727		RD23B	1149.75	945.27	994.11	1134.2	1519.35	1432.6
812	1646	P06493|CDK1_HUMAN	282.11	34095	13	54	Cyclin-dependent kinase 1 OS=Homo sapiens OX=9606 GN=CDK1 PE=1 SV=3	P06493		CDK1	851.39	812.49	532.45	1358.15	1592.3	1430.9
386	361	P27708|PYR1_HUMAN	358.37	242981	38	31	CAD protein OS=Homo sapiens OX=9606 GN=CAD PE=1 SV=3	P27708		PYR1	1376.55	1405	951.82	1088.15	1095.82	1292.1
834	459	Q6KC79|NIPBL_HUMAN	293.02	316051	18	10	Nipped-B-like protein OS=Homo sapiens OX=9606 GN=NIPBL PE=1 SV=2	Q6KC79		NIPBL	420.46	310.37	496.35	746.09	750.09	1109.41
665	1458	O00232|PSD12_HUMAN	311.8	52904	17	51	26S proteasome non-ATPase regulatory subunit 12 OS=Homo sapiens OX=9606 GN=PSMD12 PE=1 SV=3	O00232		PSD12	1012.46	991.46	789.45	1455.2	916.47	1378.9
479	156	Q06210-2|GFPT1_HUMAN	341.33	76759	23	49	Isoform 2 of Glutamine--fructose-6-phosphate aminotransferase [isomerizing] 1 OS=Homo sapiens OX=9606 GN=GFPT1	Q06210	2	GFPT1	2639.6	2988.5	2084.35	1194.29	1369.55	1395.35
1513	6771	O14737|PDCD5_HUMAN	162.01	14285	4	39	Programmed cell death protein 5 OS=Homo sapiens OX=9606 GN=PDCD5 PE=1 SV=3	O14737		PDCD5	954.88	767.36	1103.05	1082	730.78	1261.05
963	3166	O43399-5|TPD54_HUMAN	267.31	23787	2	53	Isoform 5 of Tumor protein D54 OS=Homo sapiens OX=9606 GN=TPD52L2	O43399	5	TPD54	753.29	374.71	327.37	677.79	709.04	1057.92
1134	3790	P45880-1|VDAC2_HUMAN	220.85	33372	7	39	Isoform 1 of Voltage-dependent anion-selective channel protein 2 OS=Homo sapiens OX=9606 GN=VDAC2	P45880	1	VDAC2	968.03	614.03	851.26	1188.95	1244.05	1329.35
576	963	Q9NR30|DDX21_HUMAN	318.31	87344	20	36	Nucleolar RNA helicase 2 OS=Homo sapiens OX=9606 GN=DDX21 PE=1 SV=5	Q9NR30		DDX21	1619.15	1659.65	1679.5	1417.15	1287.75	1415.65
788	1187	Q02809-2|PLOD1_HUMAN	312.82	88273	16	31	Isoform 2 of Procollagen-lysine 2-oxoglutarate 5-dioxygenase 1 OS=Homo sapiens OX=9606 GN=PLOD1	Q02809	2	PLOD1	1339.95	1516.2	1605.2	1699.2	1459.5	1459.2
467	226	O94832|MYO1D_HUMAN	331.56	116202	24	31	Unconventional myosin-Id OS=Homo sapiens OX=9606 GN=MYO1D PE=1 SV=2	O94832		MYO1D	1424.05	836.77	1080.01	1930.15	1563.5	1595.3
737	1019	Q13724|MOGS_HUMAN	306.88	91918	16	31	Mannosyl-oligosaccharide glucosidase OS=Homo sapiens OX=9606 GN=MOGS PE=1 SV=5	Q13724		MOGS	1127.89	666.58	801.18	1079.5	1051.9	1239.95
500	1404	Q9Y3F4-2|STRAP_HUMAN	307.16	39778	13	50	Isoform 2 of Serine-threonine kinase receptor-associated protein OS=Homo sapiens OX=9606 GN=STRAP	Q9Y3F4	2	STRAP	1995.55	2141.6	1975.35	2196.4	2352.6	1840.95
572	463	Q7L576|CYFP1_HUMAN	323.22	145182	27	26	Cytoplasmic FMR1-interacting protein 1 OS=Homo sapiens OX=9606 GN=CYFIP1 PE=1 SV=1	Q7L576		CYFP1	816.1	886.56	765.6	1496.3	1156.25	1397.5
1017	2084	P08237-3|PFKAM_HUMAN	263.18	93254	9	17	Isoform 3 of ATP-dependent 6-phosphofructokinase muscle type OS=Homo sapiens OX=9606 GN=PFKM	P08237	3	PFKAM	1604.95	1692.2	1586.2	1509.7	1496.2	1449.7
356	1791	Q15181|IPYR_HUMAN	351.8	32660	19	74	Inorganic pyrophosphatase OS=Homo sapiens OX=9606 GN=PPA1 PE=1 SV=2	Q15181		IPYR	2997.9	1880.5	1433.4	1795.4	1425.6	1390
768	4414	P24534|EF1B_HUMAN	262.59	24764	6	48	Elongation factor 1-beta OS=Homo sapiens OX=9606 GN=EEF1B2 PE=1 SV=3	P24534		EF1B	1809.5	1393.1	1501.85	1199.25	3309.95	1387.3
741	1539	Q14435|GALT3_HUMAN	315.68	72610	15	38	Polypeptide N-acetylgalactosaminyltransferase 3 OS=Homo sapiens OX=9606 GN=GALNT3 PE=1 SV=2	Q14435		GALT3	1529.55	2309.3	1658.1	2023.45	1596.55	1529.1
860	1578	A0FGR8-6|ESYT2_HUMAN	291.95	104708	19	29	Isoform 6 of Extended synaptotagmin-2 OS=Homo sapiens OX=9606 GN=ESYT2	A0FGR8	6	ESYT2	1097.55	967.82	936.91	1163.45	1333.75	1306.4
878	1143	Q9H2K8|TAOK3_HUMAN	281.34	105406	13	19	Serine/threonine-protein kinase TAO3 OS=Homo sapiens OX=9606 GN=TAOK3 PE=1 SV=2	Q9H2K8		TAOK3	1311	1227.7	615.94	1115.91	1343.5	1382.3
767	1215	Q9UBT2|SAE2_HUMAN	288.45	71224	15	33	SUMO-activating enzyme subunit 2 OS=Homo sapiens OX=9606 GN=UBA2 PE=1 SV=2	Q9UBT2		SAE2	891.4	760.52	950.18	1358.95	840.19	1312.5
740	1811	P08240|SRPRA_HUMAN	259.18	69811	10	21	Signal recognition particle receptor subunit alpha OS=Homo sapiens OX=9606 GN=SRPRA PE=1 SV=2	P08240		SRPRA	1701.45	1353.65	1766.65	1211.7	1132.95	1280.4
1203	2596	Q12792-3|TWF1_HUMAN	269.93	41018	9	46	Isoform 3 of Twinfilin-1 OS=Homo sapiens OX=9606 GN=TWF1	Q12792	3	TWF1	1085.25	1353.7	1293.35	1022.36	1332.75	1355.5
1035	2193	Q9UHD1|CHRD1_HUMAN	238.8	37490	8	35	Cysteine and histidine-rich domain-containing protein 1 OS=Homo sapiens OX=9606 GN=CHORDC1 PE=1 SV=2	Q9UHD1		CHRD1	1470.3	1354.98	1346.61	1022.6	1544.55	1374.8
1152	3006	Q15645|PCH2_HUMAN	241.85	48551	8	26	Pachytene checkpoint protein 2 homolog OS=Homo sapiens OX=9606 GN=TRIP13 PE=1 SV=2	Q15645		PCH2	1401.6	1517.1	1361.75	1436.85	1411.25	1392.2
385	1198	O00148|DX39A_HUMAN	340.18	49130	11	50	ATP-dependent RNA helicase DDX39A OS=Homo sapiens OX=9606 GN=DDX39A PE=1 SV=2	O00148		DX39A	1119.12	1118.25	754.23	1142.55	1141.7	1293.45
821	1853	P46459|NSF_HUMAN	270.94	82594	10	18	Vesicle-fusing ATPase OS=Homo sapiens OX=9606 GN=NSF PE=1 SV=3	P46459		NSF	944.66	1129.05	777.31	1295.35	1238.8	1342.55
525	2392	P49721|PSB2_HUMAN	283.92	22836	11	68	Proteasome subunit beta type-2 OS=Homo sapiens OX=9606 GN=PSMB2 PE=1 SV=1	P49721		PSB2	1258.49	1627.9	2082.4	2463.05	1861.35	1794.8
1377	3307	Q14978|NOLC1_HUMAN	185.65	73603	6	11	Nucleolar and coiled-body phosphoprotein 1 OS=Homo sapiens OX=9606 GN=NOLC1 PE=1 SV=2	Q14978		NOLC1	2024.05	1885.56	1503.25	2208.35	998.19	1364.9
550	606	Q9NYU2|UGGG1_HUMAN	339.95	177189	25	24	UDP-glucose:glycoprotein glucosyltransferase 1 OS=Homo sapiens OX=9606 GN=UGGT1 PE=1 SV=3	Q9NYU2		UGGG1	1300.7	1724.4	1280.15	1599	1226	1364.3
823	1216	O15269|SPTC1_HUMAN	263.21	52744	13	38	Serine palmitoyltransferase 1 OS=Homo sapiens OX=9606 GN=SPTLC1 PE=1 SV=1	O15269		SPTC1	741.83	647.33	545.57	1539.65	1249.5	1380.3
1025	5261	P52926|HMGA2_HUMAN	218.32	11832	5	59	High mobility group protein HMGI-C OS=Homo sapiens OX=9606 GN=HMGA2 PE=1 SV=1	P52926		HMGA2	1962.4	1855	2735.5	1399.5	915.6	1354.85
628	953	O00231|PSD11_HUMAN	287.8	47464	16	46	26S proteasome non-ATPase regulatory subunit 11 OS=Homo sapiens OX=9606 GN=PSMD11 PE=1 SV=3	O00231		PSD11	4826.25	3614.75	1099.5	2079.6	3352.5	1803.75
552	3573	P05204|HMGN2_HUMAN	306.99	9393	10	72	Non-histone chromosomal protein HMG-17 OS=Homo sapiens OX=9606 GN=HMGN2 PE=1 SV=3	P05204		HMGN2	5571.05	4033.55	4327.95	1051.8	750.91	1217.55
1719	4698	P31937|3HIDH_HUMAN	241.72	35329	10	40	3-hydroxyisobutyrate dehydrogenase mitochondrial OS=Homo sapiens OX=9606 GN=HIBADH PE=1 SV=2	P31937		3HIDH	1145.9	1039.09	1226.1	1260.8	1499	1350.2
870	2515	Q9NR19-2|ACSA_HUMAN	287.7	80087	10	23	Isoform 2 of Acetyl-coenzyme A synthetase cytoplasmic OS=Homo sapiens OX=9606 GN=ACSS2	Q9NR19	2	ACSA	1504.75	1374.3	1317	1630.3	2065.75	1669.5
632	3320	P11766|ADHX_HUMAN	308.78	39724	10	33	Alcohol dehydrogenase class-3 OS=Homo sapiens OX=9606 GN=ADH5 PE=1 SV=4	P11766		ADHX	1555.55	1650.95	1491.5	1413.5	1439.4	1343.9
1015	3415	Q9H0U4|RAB1B_HUMAN	255.34	22171	5	64	Ras-related protein Rab-1B OS=Homo sapiens OX=9606 GN=RAB1B PE=1 SV=1	Q9H0U4		RAB1B	1276.55	1560.05	1387.9	942.4	1255.05	1302.75
867	2494	Q16881-6|TRXR1_HUMAN	290.1	67266	12	30	Isoform 6 of Thioredoxin reductase 1 cytoplasmic OS=Homo sapiens OX=9606 GN=TXNRD1	Q16881	6	TRXR1	1586.05	1525.4	2287.6	1359.25	1255.35	1322.25
635	959	Q9ULV4-3|COR1C_HUMAN	278.75	58948	20	43	Isoform 3 of Coronin-1C OS=Homo sapiens OX=9606 GN=CORO1C	Q9ULV4	3	COR1C	1959.7	1495.85	1396	1320.75	1198.8	1321.8
961	4140	O00629|IMA3_HUMAN	227.65	57887	7	29	Importin subunit alpha-3 OS=Homo sapiens OX=9606 GN=KPNA4 PE=1 SV=1	O00629		IMA3	1141.25	1090.75	1239.35	1268.9	1279.25	1334.5
1094	1506	O94826|TOM70_HUMAN	300.95	67455	14	39	Mitochondrial import receptor subunit TOM70 OS=Homo sapiens OX=9606 GN=TOMM70 PE=1 SV=1	O94826		TOM70	1006.48	946.47	1061.57	1234.9	1244.3	1291.2
1053	1311	Q9UHB9|SRP68_HUMAN	300.87	70730	14	31	Signal recognition particle subunit SRP68 OS=Homo sapiens OX=9606 GN=SRP68 PE=1 SV=2	Q9UHB9		SRP68	1103.81	1085.12	1011.17	1222.37	1258.95	1316.5
3931	5883	Q9Y5Q9|TF3C3_HUMAN	121.92	101272	4	5	General transcription factor 3C polypeptide 3 OS=Homo sapiens OX=9606 GN=GTF3C3 PE=1 SV=1	Q9Y5Q9		TF3C3	0	0	0	0	0	657.2
1043	3409	P24752|THIL_HUMAN	274.25	45200	10	33	Acetyl-CoA acetyltransferase mitochondrial OS=Homo sapiens OX=9606 GN=ACAT1 PE=1 SV=1	P24752		THIL	858.18	721.91	635.58	1057.04	1336.9	1295.85
758	3255	P61586|RHOA_HUMAN	227.15	21768	5	54	Transforming protein RhoA OS=Homo sapiens OX=9606 GN=RHOA PE=1 SV=1	P61586		RHOA	1078.5	978.42	1245.4	1020.09	608.7	1260.3
367	4052	Q93077|H2A1C_HUMAN	272.46	14105	2	68	Histone H2A type 1-C OS=Homo sapiens OX=9606 GN=H2AC6 PE=1 SV=3	Q93077		H2A1C	1689.55	1893.5	1891.4	1305.95	1270.55	1288.85
924	1775	Q14847|LASP1_HUMAN	231.52	29717	10	65	LIM and SH3 domain protein 1 OS=Homo sapiens OX=9606 GN=LASP1 PE=1 SV=2	Q14847		LASP1	2369.5	2302.05	2159.35	1261.25	1300.75	1292
113	202	P35241|RADI_HUMAN	375.92	68564	18	49	Radixin OS=Homo sapiens OX=9606 GN=RDX PE=1 SV=1	P35241		RADI	1203.9	1161.45	1343.75	1150.56	1255.95	1291.3
580	460	Q9BQG0-2|MBB1A_HUMAN	333.71	149366	28	27	Isoform 2 of Myb-binding protein 1A OS=Homo sapiens OX=9606 GN=MYBBP1A	Q9BQG0	2	MBB1A	1099.7	760.38	1092.45	1162.5	1111.03	1280.35
2160	9386	P14927-2|QCR7_HUMAN	150.9	16267	3	21	Isoform 2 of Cytochrome b-c1 complex subunit 7 OS=Homo sapiens OX=9606 GN=UQCRB	P14927	2	QCR7	567.97	215.27	124.57	144.93	232.43	739.12
1089	1737	P27694|RFA1_HUMAN	267.22	68138	11	26	Replication protein A 70 kDa DNA-binding subunit OS=Homo sapiens OX=9606 GN=RPA1 PE=1 SV=2	P27694		RFA1	905.06	702.97	705.13	1213.6	968.29	1204.65
719	1158	Q9Y262-2|EIF3L_HUMAN	326.65	61014	18	46	Isoform 2 of Eukaryotic translation initiation factor 3 subunit L OS=Homo sapiens OX=9606 GN=EIF3L	Q9Y262	2	EIF3L	1364.92	791.41	840.37	1499.3	1518.5	1284.7
1176	1681	Q96I24|FUBP3_HUMAN	256.35	61640	11	34	Far upstream element-binding protein 3 OS=Homo sapiens OX=9606 GN=FUBP3 PE=1 SV=2	Q96I24		FUBP3	1051.77	1098.55	964.34	857.71	1222.8	1154.25
711	1401	O95834-3|EMAL2_HUMAN	276.61	92070	12	25	Isoform 3 of Echinoderm microtubule-associated protein-like 2 OS=Homo sapiens OX=9606 GN=EML2	O95834	3	EMAL2	1153.9	1299.7	1243.35	1368	1513.1	1391.65
901	3323	Q99829|CPNE1_HUMAN	219.13	59059	6	18	Copine-1 OS=Homo sapiens OX=9606 GN=CPNE1 PE=1 SV=1	Q99829		CPNE1	1795.1	2206.4	2022	2290.9	1457.35	1431.75
1247	4348	P30050|RL12_HUMAN	197.93	17819	5	41	60S ribosomal protein L12 OS=Homo sapiens OX=9606 GN=RPL12 PE=1 SV=1	P30050		RL12	1755.95	1608.65	1406.65	1123.65	1482.95	1281.3
1058	2085	Q969V3-2|NCLN_HUMAN	292.39	62846	11	25	Isoform 2 of Nicalin OS=Homo sapiens OX=9606 GN=NCLN	Q969V3	2	NCLN	750.62	875.02	786.11	960.16	1225.45	1236.45
618	891	A0AVT1|UBA6_HUMAN	325.79	117970	22	30	Ubiquitin-like modifier-activating enzyme 6 OS=Homo sapiens OX=9606 GN=UBA6 PE=1 SV=1	A0AVT1		UBA6	1647.45	1440.95	1634.55	1333.6	1525.85	1341.4
849	2926	O00299|CLIC1_HUMAN	276.08	26923	13	66	Chloride intracellular channel protein 1 OS=Homo sapiens OX=9606 GN=CLIC1 PE=1 SV=4	O00299		CLIC1	1636.35	1156.55	1277.9	1120	1471.3	1273.2
1248	1584	Q9Y305-4|ACOT9_HUMAN	247.05	50851	9	33	Isoform 4 of Acyl-coenzyme A thioesterase 9 mitochondrial OS=Homo sapiens OX=9606 GN=ACOT9	Q9Y305	4	ACOT9	594.65	366.81	359.65	1028.1	762.87	1144.5
792	2383	Q15833-2|STXB2_HUMAN	285.22	66138	11	26	Isoform 2 of Syntaxin-binding protein 2 OS=Homo sapiens OX=9606 GN=STXBP2	Q15833	2	STXB2	1004.35	1337.5	1084.7	1454.75	1172.3	1272.1
1303	3839	P54819-2|KAD2_HUMAN	247.48	25615	8	47	Isoform 2 of Adenylate kinase 2 mitochondrial OS=Homo sapiens OX=9606 GN=AK2	P54819	2	KAD2	1050.35	1300.95	1233.8	1299.8	1283.6	1273.1
503	986	Q96HC4|PDLI5_HUMAN	328.87	63945	17	35	PDZ and LIM domain protein 5 OS=Homo sapiens OX=9606 GN=PDLIM5 PE=1 SV=5	Q96HC4		PDLI5	1804.6	1894.1	1916.65	1265.05	1215.4	1263
1080	1321	P78344|IF4G2_HUMAN	249.02	102362	12	20	Eukaryotic translation initiation factor 4 gamma 2 OS=Homo sapiens OX=9606 GN=EIF4G2 PE=1 SV=1	P78344		IF4G2	1296.15	893.93	875.02	837.38	1061.54	1081.98
607	910	Q9H4L5|OSBL3_HUMAN	313.51	101224	16	27	Oxysterol-binding protein-related protein 3 OS=Homo sapiens OX=9606 GN=OSBPL3 PE=1 SV=1	Q9H4L5		OSBL3	829.08	764.39	981.08	1073.63	1049.32	1214.6
892	2156	Q86X55-1|CARM1_HUMAN	299.5	63460	10	28	Isoform 1 of Histone-arginine methyltransferase CARM1 OS=Homo sapiens OX=9606 GN=CARM1	Q86X55	1	CARM1	1294.85	1907.9	1387.85	1615.3	1255.1	1264
776	2360	O14745|NHRF1_HUMAN	270.4	38868	12	44	Na(+)/H(+) exchange regulatory cofactor NHE-RF1 OS=Homo sapiens OX=9606 GN=SLC9A3R1 PE=1 SV=4	O14745		NHRF1	1358.95	1314.9	1235.25	1562.35	1525	1351.6
1968	15369	O75964|ATP5L_HUMAN	147.1	11428	2	26	ATP synthase subunit g mitochondrial OS=Homo sapiens OX=9606 GN=ATP5MG PE=1 SV=3	O75964		ATP5L	463.96	422.83	405.77	1283.45	937.38	1262.8
726	1153	Q27J81-2|INF2_HUMAN	344.63	134617	20	26	Isoform 2 of Inverted formin-2 OS=Homo sapiens OX=9606 GN=INF2	Q27J81	2	INF2	847.8	685.02	793.71	1150.2	895.97	1204.55
738	847	P55786|PSA_HUMAN	315.17	103276	20	33	Puromycin-sensitive aminopeptidase OS=Homo sapiens OX=9606 GN=NPEPPS PE=1 SV=2	P55786		PSA	1300.6	992.51	1255.65	1138.75	1524.95	1259.7
682	1501	P09972|ALDOC_HUMAN	305.72	39456	10	46	Fructose-bisphosphate aldolase C OS=Homo sapiens OX=9606 GN=ALDOC PE=1 SV=2	P09972		ALDOC	807.49	642.58	1057.91	1163.35	1078.25	1180.65
875	1011	P46060|RAGP1_HUMAN	278.91	63542	15	38	Ran GTPase-activating protein 1 OS=Homo sapiens OX=9606 GN=RANGAP1 PE=1 SV=1	P46060		RAGP1	1019.71	1021.49	1180.61	1503.75	1477.15	1259.3
1081	3115	P49902-2|5NTC_HUMAN	279.04	61441	10	31	Isoform 2 of Cytosolic purine 5'-nucleotidase OS=Homo sapiens OX=9606 GN=NT5C2	P49902	2	5NTC	1203.8	1014.5	951.77	1295.15	1236	1255.8
521	934	P62191|PRS4_HUMAN	314.14	49185	17	47	26S proteasome regulatory subunit 4 OS=Homo sapiens OX=9606 GN=PSMC1 PE=1 SV=1	P62191		PRS4	1041.7	862.84	915.21	1690.35	1635.05	1438.95
992	1937	P49959-3|MRE11_HUMAN	260.23	81070	14	27	Isoform 3 of Double-strand break repair protein MRE11 OS=Homo sapiens OX=9606 GN=MRE11	P49959	3	MRE11	1014.96	818.95	1096.45	1458.5	1256.25	1256.1
1084	2169	Q14376|GALE_HUMAN	274.32	38282	13	52	UDP-glucose 4-epimerase OS=Homo sapiens OX=9606 GN=GALE PE=1 SV=2	Q14376		GALE	1103.55	1107.05	1599	1152	1430.3	1206.9
1106	3449	Q15392-2|DHC24_HUMAN	241.56	54750	10	28	Isoform 2 of Delta(24)-sterol reductase OS=Homo sapiens OX=9606 GN=DHCR24	Q15392	2	DHC24	897.9	930.9	622.06	1259.8	1108.2	1242.9
982	3963	P22307-8|NLTP_HUMAN	230.68	56497	7	13	Isoform 8 of Non-specific lipid-transfer protein OS=Homo sapiens OX=9606 GN=SCP2	P22307	8	NLTP	1754.1	1759.85	1789.35	1457.7	1525.45	1352.05
759	939	Q9H845|ACAD9_HUMAN	276.8	68760	15	36	Complex I assembly factor ACAD9 mitochondrial OS=Homo sapiens OX=9606 GN=ACAD9 PE=1 SV=1	Q9H845		ACAD9	766.93	788.4	692.25	1118.85	1173.45	1196.75
492	337	Q7Z2W4|ZCCHV_HUMAN	317.84	101431	20	30	Zinc finger CCCH-type antiviral protein 1 OS=Homo sapiens OX=9606 GN=ZC3HAV1 PE=1 SV=3	Q7Z2W4		ZCCHV	1892.95	1399.25	1662.05	895.03	1019.51	1108.66
907	2676	Q9H074|PAIP1_HUMAN	248.17	53525	9	25	Polyadenylate-binding protein-interacting protein 1 OS=Homo sapiens OX=9606 GN=PAIP1 PE=1 SV=1	Q9H074		PAIP1	3139.21	3605.95	683.51	1489	3756.6	1272.1
700	697	Q92621|NU205_HUMAN	314.55	227919	24	19	Nuclear pore complex protein Nup205 OS=Homo sapiens OX=9606 GN=NUP205 PE=1 SV=3	Q92621		NU205	824.08	716.02	749.9	1077.65	960.46	1139
887	3228	P61254|RL26_HUMAN	242.35	17258	4	46	60S ribosomal protein L26 OS=Homo sapiens OX=9606 GN=RPL26 PE=1 SV=1	P61254		RL26	1525.8	1091.6	1200.15	1156.6	1571.95	1254.4
978	2506	Q6YN16|HSDL2_HUMAN	251.59	45395	8	35	Hydroxysteroid dehydrogenase-like protein 2 OS=Homo sapiens OX=9606 GN=HSDL2 PE=1 SV=1	Q6YN16		HSDL2	636.14	681.13	443.65	844	982	1094.4
800	763	Q01970|PLCB3_HUMAN	306.46	138799	17	20	1-phosphatidylinositol 4 5-bisphosphate phosphodiesterase beta-3 OS=Homo sapiens OX=9606 GN=PLCB3 PE=1 SV=2	Q01970		PLCB3	1025.73	1063.97	1054.68	1522.9	1232.45	1274.75
1191	3544	P55809|SCOT1_HUMAN	237.54	56158	10	34	Succinyl-CoA:3-ketoacid coenzyme A transferase 1 mitochondrial OS=Homo sapiens OX=9606 GN=OXCT1 PE=1 SV=1	P55809		SCOT1	938.55	1290.25	790.69	1316.35	1270.1	1223.7
894	2092	Q16401-2|PSMD5_HUMAN	264.5	51312	12	39	Isoform 2 of 26S proteasome non-ATPase regulatory subunit 5 OS=Homo sapiens OX=9606 GN=PSMD5	Q16401	2	PSMD5	883.08	1228.75	841.96	1330.75	1483.4	1282.85
1082	3310	Q9UJU6-2|DBNL_HUMAN	268.15	48294	11	30	Isoform 2 of Drebrin-like protein OS=Homo sapiens OX=9606 GN=DBNL	Q9UJU6	2	DBNL	900.52	841.36	1085.36	1633.6	628.59	1218.6
818	903	Q6PKG0-3|LARP1_HUMAN	274.94	116465	15	20	Isoform 2 of La-related protein 1 OS=Homo sapiens OX=9606 GN=LARP1	Q6PKG0	3	LARP1	1145.3	849.9	1117.3	1112.07	1139.1	1184.85
953	1053	O00159|MYO1C_HUMAN	294.32	121682	15	22	Unconventional myosin-Ic OS=Homo sapiens OX=9606 GN=MYO1C PE=1 SV=4	O00159		MYO1C	1113.92	1456.4	1269.5	1167.3	925.04	1151.8
804	827	Q9H2M9|RBGPR_HUMAN	322.33	155984	17	19	Rab3 GTPase-activating protein non-catalytic subunit OS=Homo sapiens OX=9606 GN=RAB3GAP2 PE=1 SV=1	Q9H2M9		RBGPR	978.02	863.63	918.64	1032.05	1114.25	1153.45
1643	4110	Q9NX40|OCAD1_HUMAN	217.75	27626	6	34	OCIA domain-containing protein 1 OS=Homo sapiens OX=9606 GN=OCIAD1 PE=1 SV=1	Q9NX40		OCAD1	851.72	417.49	482.04	775.11	881.24	1019.81
1119	4112	Q9Y6C9|MTCH2_HUMAN	213.71	33331	4	23	Mitochondrial carrier homolog 2 OS=Homo sapiens OX=9606 GN=MTCH2 PE=1 SV=1	Q9Y6C9		MTCH2	887.44	746.95	634.9	1060.83	1100.85	1185.65
1147	1779	P35998|PRS7_HUMAN	274.45	48634	14	44	26S proteasome regulatory subunit 7 OS=Homo sapiens OX=9606 GN=PSMC2 PE=1 SV=3	P35998		PRS7	2520.6	2261.1	2564.6	3194.45	2904.85	2089.85
600	446	Q14203-4|DCTN1_HUMAN	336.31	138750	21	26	Isoform 4 of Dynactin subunit 1 OS=Homo sapiens OX=9606 GN=DCTN1	Q14203	4	DCTN1	2244.24	1009.52	2362.58	1648.68	815.92	1094.28
653	535	Q8N3U4|STAG2_HUMAN	310.86	141326	18	23	Cohesin subunit SA-2 OS=Homo sapiens OX=9606 GN=STAG2 PE=1 SV=3	Q8N3U4		STAG2	1028.35	584.36	680.04	1315.95	1076.25	1199.4
588	508	O60271-2|JIP4_HUMAN	313.12	145135	18	22	Isoform 2 of C-Jun-amino-terminal kinase-interacting protein 4 OS=Homo sapiens OX=9606 GN=SPAG9	O60271	2	JIP4	1253.15	1188.5	1082.95	1408.05	847.21	1198.7
1032	2969	Q9UIV8|SPB13_HUMAN	292.85	44276	13	38	Serpin B13 OS=Homo sapiens OX=9606 GN=SERPINB13 PE=1 SV=2	Q9UIV8		SPB13	747.26	792.58	1468.83	1037.97	938.82	1097.22
1139	2576	Q13492-3|PICAL_HUMAN	266.35	66393	9	26	Isoform 3 of Phosphatidylinositol-binding clathrin assembly protein OS=Homo sapiens OX=9606 GN=PICALM	Q13492	3	PICAL	909.39	776.51	711.82	994.43	1022.87	1177.55
1358	3502	Q9NQG5|RPR1B_HUMAN	251.72	36900	5	31	Regulation of nuclear pre-mRNA domain-containing protein 1B OS=Homo sapiens OX=9606 GN=RPRD1B PE=1 SV=1	Q9NQG5		RPR1B	774.58	1110.15	1017.97	1128.57	1074.8	1147.35
837	2413	Q9H7Z7|PGES2_HUMAN	268.6	41943	10	37	Prostaglandin E synthase 2 OS=Homo sapiens OX=9606 GN=PTGES2 PE=1 SV=1	Q9H7Z7		PGES2	798.1	507.84	729.03	1267.5	1086.01	1189.7
594	719	Q13428-2|TCOF_HUMAN	298.41	144314	18	17	Isoform 2 of Treacle protein OS=Homo sapiens OX=9606 GN=TCOF1	Q13428	2	TCOF	1043.54	1212.12	1239.45	875.49	1707.97	1095.85
1237	3325	Q9Y2Z4|SYYM_HUMAN	264.82	53199	11	43	Tyrosine--tRNA ligase mitochondrial OS=Homo sapiens OX=9606 GN=YARS2 PE=1 SV=2	Q9Y2Z4		SYYM	541.4	383.78	485.97	794.49	671.89	1016.65
808	1092	P49589-3|SYCC_HUMAN	301.42	94638	17	26	Isoform 3 of Cysteine--tRNA ligase cytoplasmic OS=Homo sapiens OX=9606 GN=CARS1	P49589	3	SYCC	1145.69	923.69	943.92	862.11	719.83	995.1
2794	31701	Q59GN2|R39L5_HUMAN	67.81	6323	1	20	Putative 60S ribosomal protein L39-like 5 OS=Homo sapiens OX=9606 GN=RPL39P5 PE=5 SV=2	Q59GN2		R39L5	1005.26	1126.5	1241.25	1221.7	974.68	1177.3
844	1292	Q14126|DSG2_HUMAN	273.08	122294	15	22	Desmoglein-2 OS=Homo sapiens OX=9606 GN=DSG2 PE=1 SV=2	Q14126		DSG2	593.49	799.37	895.83	838.02	1006.76	1009.63
764	557	P33992|MCM5_HUMAN	308.37	82286	23	40	DNA replication licensing factor MCM5 OS=Homo sapiens OX=9606 GN=MCM5 PE=1 SV=5	P33992		MCM5	876.24	839.29	648.09	1257.3	1341.3	1173.2
1856	10872	P62857|RS28_HUMAN	110.2	7841	2	33	40S ribosomal protein S28 OS=Homo sapiens OX=9606 GN=RPS28 PE=1 SV=1	P62857		RS28	2573.15	1742.15	1547.15	652.97	644.29	981.54
1581	3319	Q9UL25|RAB21_HUMAN	225.72	24348	6	33	Ras-related protein Rab-21 OS=Homo sapiens OX=9606 GN=RAB21 PE=1 SV=3	Q9UL25		RAB21	1346.05	1230.6	1230.45	969.23	1160.5	1141.5
1173	3097	Q969G5|CAVN3_HUMAN	225.42	27701	6	31	Caveolae-associated protein 3 OS=Homo sapiens OX=9606 GN=CAVIN3 PE=1 SV=3	Q969G5		CAVN3	1084.44	1344.9	1567.3	1462.55	1314.35	1306.7
578	1673	P80723|BASP1_HUMAN	316.2	22693	13	77	Brain acid soluble protein 1 OS=Homo sapiens OX=9606 GN=BASP1 PE=1 SV=2	P80723		BASP1	1044.28	1020.16	1271.2	1222.3	807.44	1046.45
570	755	P29590|PML_HUMAN	290.6	97551	14	21	Protein PML OS=Homo sapiens OX=9606 GN=PML PE=1 SV=3	P29590		PML	1530.2	1378.35	1468.7	2584.6	1328.3	1247.95
816	2458	P61221|ABCE1_HUMAN	284.41	67314	13	33	ATP-binding cassette sub-family E member 1 OS=Homo sapiens OX=9606 GN=ABCE1 PE=1 SV=1	P61221		ABCE1	1505.2	1475.5	1455.75	1196.95	1137.02	1166.4
1003	1509	P32455|GBP1_HUMAN	234.78	67931	10	21	Guanylate-binding protein 1 OS=Homo sapiens OX=9606 GN=GBP1 PE=1 SV=2	P32455		GBP1	1305.95	1272.4	1202.5	1061.75	1054.1	1117.45
684	1780	P21281|VATB2_HUMAN	280.31	56501	12	39	V-type proton ATPase subunit B brain isoform OS=Homo sapiens OX=9606 GN=ATP6V1B2 PE=1 SV=3	P21281		VATB2	966.31	1056.15	650.53	1332	1733	1279.5
753	978	O75694|NU155_HUMAN	291.2	155199	20	25	Nuclear pore complex protein Nup155 OS=Homo sapiens OX=9606 GN=NUP155 PE=1 SV=1	O75694		NU155	783.62	997.78	803.45	1578.75	1050.7	1181.75
668	1037	Q6P179|ERAP2_HUMAN	295.98	110462	15	20	Endoplasmic reticulum aminopeptidase 2 OS=Homo sapiens OX=9606 GN=ERAP2 PE=1 SV=2	Q6P179		ERAP2	1018.96	866.36	927.27	760.4	982.85	967.55
704	598	O60313-2|OPA1_HUMAN	285.92	115884	19	27	Isoform 2 of Dynamin-like 120 kDa protein mitochondrial OS=Homo sapiens OX=9606 GN=OPA1	O60313	2	OPA1	509.68	472.11	423.9	719.48	823.94	969.29
673	1255	Q1KMD3|HNRL2_HUMAN	296.17	85105	21	39	Heterogeneous nuclear ribonucleoprotein U-like protein 2 OS=Homo sapiens OX=9606 GN=HNRNPUL2 PE=1 SV=1	Q1KMD3		HNRL2	1464.55	1189.55	981.51	1844.7	1325.1	1264.05
1138	3044	O60884|DNJA2_HUMAN	236.77	45746	10	30	DnaJ homolog subfamily A member 2 OS=Homo sapiens OX=9606 GN=DNAJA2 PE=1 SV=1	O60884		DNJA2	888.44	932.54	966.36	1084.46	1221.1	1158.1
745	1270	Q9BSJ2|GCP2_HUMAN	330.24	102534	20	30	Gamma-tubulin complex component 2 OS=Homo sapiens OX=9606 GN=TUBGCP2 PE=1 SV=2	Q9BSJ2		GCP2	596.98	725.2	739.15	1065.4	659.88	1107.4
649	543	P51610|HCFC1_HUMAN	342.47	208730	21	17	Host cell factor 1 OS=Homo sapiens OX=9606 GN=HCFC1 PE=1 SV=2	P51610		HCFC1	759.47	646.04	461.47	756.01	994.16	1007.08
592	996	Q15437|SC23B_HUMAN	296.15	86479	14	30	Protein transport protein Sec23B OS=Homo sapiens OX=9606 GN=SEC23B PE=1 SV=2	Q15437		SC23B	1803.75	1585.8	1347.35	1064.2	1012.23	1120.25
598	1067	Q969Z0|FAKD4_HUMAN	318.16	70738	12	34	FAST kinase domain-containing protein 4 OS=Homo sapiens OX=9606 GN=TBRG4 PE=1 SV=1	Q969Z0		FAKD4	500.21	560.51	499.27	1586.4	890.73	1148.5
1042	4828	P48507|GSH0_HUMAN	241.1	30727	7	31	Glutamate--cysteine ligase regulatory subunit OS=Homo sapiens OX=9606 GN=GCLM PE=1 SV=1	P48507		GSH0	970.77	978.94	1028.45	1034.4	1122.82	1102.55
757	3064	O76003|GLRX3_HUMAN	297.36	37432	13	33	Glutaredoxin-3 OS=Homo sapiens OX=9606 GN=GLRX3 PE=1 SV=2	O76003		GLRX3	1046.24	1812.32	734.01	1047.19	778.09	1053.16
488	212	P30622-2|CLIP1_HUMAN	345.68	156781	26	28	Isoform 3 of CAP-Gly domain-containing linker protein 1 OS=Homo sapiens OX=9606 GN=CLIP1	P30622	2	CLIP1	843.62	905.69	1002.9	1314.2	648.45	1144.9
1129	1994	Q9BPX3|CND3_HUMAN	257.23	114334	10	12	Condensin complex subunit 3 OS=Homo sapiens OX=9606 GN=NCAPG PE=1 SV=1	Q9BPX3		CND3	733.18	665.72	772.45	808.81	694.02	962.76
973	1572	P49736|MCM2_HUMAN	280.33	101896	14	21	DNA replication licensing factor MCM2 OS=Homo sapiens OX=9606 GN=MCM2 PE=1 SV=4	P49736		MCM2	657.12	671	1272.55	1094.25	814.23	1085.75
1178	4302	Q9H3N1|TMX1_HUMAN	181.89	31791	7	22	Thioredoxin-related transmembrane protein 1 OS=Homo sapiens OX=9606 GN=TMX1 PE=1 SV=1	Q9H3N1		TMX1	783.53	964.64	939.03	1148.5	818.04	1038.21
941	2511	P30520|PURA2_HUMAN	257.53	50097	10	28	Adenylosuccinate synthetase isozyme 2 OS=Homo sapiens OX=9606 GN=ADSS2 PE=1 SV=3	P30520		PURA2	824.08	1408.55	1358.7	763.37	1327.7	1136.2
1005	2121	P52306-5|GDS1_HUMAN	281.68	66388	10	26	Isoform 5 of Rap1 GTPase-GDP dissociation stimulator 1 OS=Homo sapiens OX=9606 GN=RAP1GDS1	P52306	5	GDS1	1078.65	632.57	484.79	670.89	685.04	925.05
292	235	Q02218|ODO1_HUMAN	427.86	115935	37	50	2-oxoglutarate dehydrogenase mitochondrial OS=Homo sapiens OX=9606 GN=OGDH PE=1 SV=3	Q02218		ODO1	1076.5	849.63	1007.33	1242.35	1121.55	1154.75
295	239	Q14789-4|GOGB1_HUMAN	378.52	367423	35	18	Isoform 4 of Golgin subfamily B member 1 OS=Homo sapiens OX=9606 GN=GOLGB1	Q14789	4	GOGB1	987.54	1013.94	956	1378.55	1143.2	1158.1
1646	4820	P61289-3|PSME3_HUMAN	196.74	30890	8	41	Isoform 3 of Proteasome activator complex subunit 3 OS=Homo sapiens OX=9606 GN=PSME3	P61289	3	PSME3	877.05	464.96	1018.49	1282.15	1126.55	1154.3
1391	4664	Q8IYB3|SRRM1_HUMAN	176.9	102335	4	8	Serine/arginine repetitive matrix protein 1 OS=Homo sapiens OX=9606 GN=SRRM1 PE=1 SV=2	Q8IYB3		SRRM1	1095.45	903.25	779.75	834.88	1026.03	1050.16
1483	4387	P36957|ODO2_HUMAN	217.91	48755	10	23	Dihydrolipoyllysine-residue succinyltransferase component of 2-oxoglutarate dehydrogenase complex mitochondrial OS=Homo sapiens OX=9606 GN=DLST PE=1 SV=4	P36957		ODO2	568.96	647.84	509.14	733.73	877.13	932.56
871	1104	Q9Y5L0-3|TNPO3_HUMAN	282.09	102541	14	23	Isoform 3 of Transportin-3 OS=Homo sapiens OX=9606 GN=TNPO3	Q9Y5L0	3	TNPO3	928.85	804.75	1004.01	2683.52	846.8	1056.07
893	788	O60306|AQR_HUMAN	287.83	171294	12	12	RNA helicase aquarius OS=Homo sapiens OX=9606 GN=AQR PE=1 SV=4	O60306		AQR	458.24	490.81	484.78	868.96	831.4	1015.34
402	410	Q9UHD8|SEPT9_HUMAN	302.99	65402	23	49	Septin-9 OS=Homo sapiens OX=9606 GN=SEPTIN9 PE=1 SV=2	Q9UHD8		2009-09-01	1173.6	2107.7	1413.4	1812.4	1490.55	1377.45
898	3800	O43837|IDH3B_HUMAN	250.73	42184	10	32	Isocitrate dehydrogenase [NAD] subunit beta mitochondrial OS=Homo sapiens OX=9606 GN=IDH3B PE=1 SV=2	O43837		IDH3B	740.17	571.56	510.77	760.45	971.47	994.92
1329	2832	Q8TAT6-2|NPL4_HUMAN	231.66	69461	8	17	Isoform 2 of Nuclear protein localization protein 4 homolog OS=Homo sapiens OX=9606 GN=NPLOC4	Q8TAT6	2	NPL4	901.61	603.52	880.03	635.88	867.52	988.43
1290	7523	O43583|DENR_HUMAN	214.04	22092	4	30	Density-regulated protein OS=Homo sapiens OX=9606 GN=DENR PE=1 SV=2	O43583		DENR	898.95	832.1	976.46	1035.95	982.88	1061.45
1326	3716	Q9BRR6-2|ADPGK_HUMAN	227.73	53961	7	27	Isoform 2 of ADP-dependent glucokinase OS=Homo sapiens OX=9606 GN=ADPGK	Q9BRR6	2	ADPGK	707.82	602.14	691.63	783.35	468.73	918.65
1052	4062	Q96AG4|LRC59_HUMAN	237.29	34930	8	32	Leucine-rich repeat-containing protein 59 OS=Homo sapiens OX=9606 GN=LRRC59 PE=1 SV=1	Q96AG4		LRC59	2122.75	1963	1813	1451.9	1418.55	1272.65
1174	1722	P17174|AATC_HUMAN	266.93	46248	13	51	Aspartate aminotransferase cytoplasmic OS=Homo sapiens OX=9606 GN=GOT1 PE=1 SV=3	P17174		AATC	1557.75	1651.2	797.01	1165	1186.1	1144.3
1457	4021	P63208|SKP1_HUMAN	201.31	18658	7	64	S-phase kinase-associated protein 1 OS=Homo sapiens OX=9606 GN=SKP1 PE=1 SV=2	P63208		SKP1	312.52	318.77	377.58	1103.95	838.96	1059.95
2962	6860	P62913-2|RL11_HUMAN	138.8	20124	3	24	Isoform 2 of 60S ribosomal protein L11 OS=Homo sapiens OX=9606 GN=RPL11	P62913	2	RL11	883.76	982.61	852.4	1399.05	840.2	1241.35
1286	2080	Q3LXA3|TKFC_HUMAN	274.55	58947	10	28	Triokinase/FMN cyclase OS=Homo sapiens OX=9606 GN=TKFC PE=1 SV=2	Q3LXA3		TKFC	308.4	302.35	337.46	437.66	761.04	776.74
2102	28731	Q15125|EBP_HUMAN	96.12	26353	1	5	3-beta-hydroxysteroid-Delta(8) Delta(7)-isomerase OS=Homo sapiens OX=9606 GN=EBP PE=1 SV=3	Q15125		EBP	887.87	801.15	1333	1538.65	1194.12	1267.3
890	3087	Q16851|UGPA_HUMAN	249.93	56940	7	20	UTP--glucose-1-phosphate uridylyltransferase OS=Homo sapiens OX=9606 GN=UGP2 PE=1 SV=5	Q16851		UGPA	901.26	853.19	975.53	1033.8	1014.46	1068.65
1143	4835	Q9UBQ5-2|EIF3K_HUMAN	248.77	24484	8	55	Isoform 2 of Eukaryotic translation initiation factor 3 subunit K OS=Homo sapiens OX=9606 GN=EIF3K	Q9UBQ5	2	EIF3K	796.99	802.49	763.83	1494.7	758.53	1099.1
966	3485	Q9BTV4|TMM43_HUMAN	274.59	44876	13	45	Transmembrane protein 43 OS=Homo sapiens OX=9606 GN=TMEM43 PE=1 SV=1	Q9BTV4		TMM43	935.57	710.16	745.28	1101.8	1118.4	1108.5
1701	4964	O95456|PSMG1_HUMAN	188.04	32854	4	25	Proteasome assembly chaperone 1 OS=Homo sapiens OX=9606 GN=PSMG1 PE=1 SV=1	O95456		PSMG1	675.09	602.45	601.3	920.53	698.93	965.58
1443	5097	P50238|CRIP1_HUMAN	196.28	8533	4	71	Cysteine-rich protein 1 OS=Homo sapiens OX=9606 GN=CRIP1 PE=1 SV=3	P50238		CRIP1	7120.55	6965.3	6913.95	1769.15	1770.25	1294.05
1085	1818	Q9Y2W2|WBP11_HUMAN	226.24	69998	10	18	WW domain-binding protein 11 OS=Homo sapiens OX=9606 GN=WBP11 PE=1 SV=1	Q9Y2W2		WBP11	941.38	922.76	957.47	1132	1046.45	1078.15
905	1971	O94776|MTA2_HUMAN	258.67	75023	11	25	Metastasis-associated protein MTA2 OS=Homo sapiens OX=9606 GN=MTA2 PE=1 SV=1	O94776		MTA2	1109.15	960.3	1090.61	821.27	1081.93	1039.02
639	754	Q9HCE1|MOV10_HUMAN	281.21	113671	14	22	Helicase MOV-10 OS=Homo sapiens OX=9606 GN=MOV10 PE=1 SV=2	Q9HCE1		MOV10	699.95	490.21	614.11	1130.35	807.46	1073.15
1228	2016	Q8IWS0|PHF6_HUMAN	245.04	41290	9	33	PHD finger protein 6 OS=Homo sapiens OX=9606 GN=PHF6 PE=1 SV=1	Q8IWS0		PHF6	285.84	442.24	427.07	530.89	803.85	816.19
1676	19375	A6NHG4|DDTL_HUMAN	175.92	14195	3	21	D-dopachrome decarboxylase-like protein OS=Homo sapiens OX=9606 GN=DDTL PE=2 SV=1	A6NHG4		DDTL	1318.4	1346.6	1129.31	986.68	799.3	948.18
781	3354	P28066|PSA5_HUMAN	261.48	26411	9	48	Proteasome subunit alpha type-5 OS=Homo sapiens OX=9606 GN=PSMA5 PE=1 SV=3	P28066		PSA5	840.28	932.33	938.15	1033.45	1074.46	1068.2
971	2036	Q9BZE4-2|NOG1_HUMAN	274.64	68273	11	33	Isoform 2 of Nucleolar GTP-binding protein 1 OS=Homo sapiens OX=9606 GN=GTPBP4	Q9BZE4	2	NOG1	753.36	991.18	806.64	1400.85	819.19	1083.2
840	1224	Q9Y2Z0-2|SGT1_HUMAN	271.61	37805	13	62	Isoform 2 of Protein SGT1 homolog OS=Homo sapiens OX=9606 GN=SUGT1	Q9Y2Z0	2	SGT1	830.52	877.37	877.53	1075.95	953.09	1047.7
515	643	Q15418|KS6A1_HUMAN	349.04	82723	19	42	Ribosomal protein S6 kinase alpha-1 OS=Homo sapiens OX=9606 GN=RPS6KA1 PE=1 SV=2	Q15418		KS6A1	992.12	993.45	992.54	1217.28	1437.4	1217.1
669	1666	O43175|SERA_HUMAN	315.76	56651	13	35	D-3-phosphoglycerate dehydrogenase OS=Homo sapiens OX=9606 GN=PHGDH PE=1 SV=4	O43175		SERA	1447.15	1442.05	1043.2	953.4	1116.6	1076
881	1859	O95433|AHSA1_HUMAN	258.31	38274	10	41	Activator of 90 kDa heat shock protein ATPase homolog 1 OS=Homo sapiens OX=9606 GN=AHSA1 PE=1 SV=1	O95433		AHSA1	1071.95	833.97	967.32	650.08	950.25	979.7
681	497	O60264|SMCA5_HUMAN	288.39	121905	18	25	SWI/SNF-related matrix-associated actin-dependent regulator of chromatin subfamily A member 5 OS=Homo sapiens OX=9606 GN=SMARCA5 PE=1 SV=1	O60264		SMCA5	1170.05	698.75	922.16	1249.65	937.76	1072.3
865	1456	P54578|UBP14_HUMAN	296.94	56069	17	50	Ubiquitin carboxyl-terminal hydrolase 14 OS=Homo sapiens OX=9606 GN=USP14 PE=1 SV=3	P54578		UBP14	928.24	1002.05	752.33	739.32	795.16	922.88
1018	1374	O15042-2|SR140_HUMAN	284.95	118235	13	16	Isoform 2 of U2 snRNP-associated SURP motif-containing protein OS=Homo sapiens OX=9606 GN=U2SURP	O15042	2	SR140	649.18	702.09	696.5	849.13	768.41	946.28
932	2799	P21266|GSTM3_HUMAN	218.53	26560	9	30	Glutathione S-transferase Mu 3 OS=Homo sapiens OX=9606 GN=GSTM3 PE=1 SV=3	P21266		GSTM3	1054.2	812.82	373.52	965.24	678.85	1010.09
507	1433	P38159|RBMX_HUMAN	260.32	42332	6	29	RNA-binding motif protein X chromosome OS=Homo sapiens OX=9606 GN=RBMX PE=1 SV=3	P38159		RBMX	1816.95	2585.6	1784.9	3146.75	1681.1	1190.3
944	2235	P54920|SNAA_HUMAN	318.13	33233	12	59	Alpha-soluble NSF attachment protein OS=Homo sapiens OX=9606 GN=NAPA PE=1 SV=3	P54920		SNAA	984.05	1347.75	1009.48	1316.45	954.13	1063.6
862	2131	Q15365|PCBP1_HUMAN	278.22	37498	10	67	Poly(rC)-binding protein 1 OS=Homo sapiens OX=9606 GN=PCBP1 PE=1 SV=2	Q15365		PCBP1	835.54	1295.1	846.69	1395.35	1095.58	1156.3
975	3625	P47755|CAZA2_HUMAN	259.49	32949	4	32	F-actin-capping protein subunit alpha-2 OS=Homo sapiens OX=9606 GN=CAPZA2 PE=1 SV=3	P47755		CAZA2	880.92	609.41	996.74	1118.65	572.04	1059.6
762	2387	O14579|COPE_HUMAN	277.67	34482	12	54	Coatomer subunit epsilon OS=Homo sapiens OX=9606 GN=COPE PE=1 SV=3	O14579		COPE	1365.55	1064.1	1096.32	763.74	757.45	995.62
310	125	O15020|SPTN2_HUMAN	413.53	271323	32	23	Spectrin beta chain non-erythrocytic 2 OS=Homo sapiens OX=9606 GN=SPTBN2 PE=1 SV=3	O15020		SPTN2	387.49	581.77	513.63	1025.51	851.56	983.03
1537	6471	P12532|KCRU_HUMAN	210.38	47037	5	19	Creatine kinase U-type mitochondrial OS=Homo sapiens OX=9606 GN=CKMT1A PE=1 SV=1	P12532		KCRU	679.48	792.29	611.02	920.46	1097.95	1060.8
1308	1965	Q96DI7|SNR40_HUMAN	244.68	39311	11	54	U5 small nuclear ribonucleoprotein 40 kDa protein OS=Homo sapiens OX=9606 GN=SNRNP40 PE=1 SV=1	Q96DI7		SNR40	1047.66	1055.86	875.84	958.14	1172.85	1077.25
465	1315	P31943|HNRH1_HUMAN	315.52	49229	5	43	Heterogeneous nuclear ribonucleoprotein H OS=Homo sapiens OX=9606 GN=HNRNPH1 PE=1 SV=4	P31943		HNRH1	676.31	618.82	663.71	838.55	780.84	949.19
345	2441	P62917|RL8_HUMAN	312.11	28025	11	38	60S ribosomal protein L8 OS=Homo sapiens OX=9606 GN=RPL8 PE=1 SV=2	P62917		RL8	4890	7096.7	6518.8	4474.95	4181.55	2643
553	293	Q9Y5S2|MRCKB_HUMAN	318.79	194314	18	16	Serine/threonine-protein kinase MRCK beta OS=Homo sapiens OX=9606 GN=CDC42BPB PE=1 SV=2	Q9Y5S2		MRCKB	617.35	521.12	677.32	696.13	682.74	907.78
1839	4899	P67870|CSK2B_HUMAN	197.07	24942	5	42	Casein kinase II subunit beta OS=Homo sapiens OX=9606 GN=CSNK2B PE=1 SV=1	P67870		CSK2B	444.67	889.16	943.79	982.9	1186.05	1048.5
827	1070	P11172|UMPS_HUMAN	285.21	52222	11	34	Uridine 5'-monophosphate synthase OS=Homo sapiens OX=9606 GN=UMPS PE=1 SV=1	P11172		UMPS	868.38	981.79	624.57	836.36	1068.9	1042.2
608	1007	P49023|PAXI_HUMAN	312.99	64505	14	39	Paxillin OS=Homo sapiens OX=9606 GN=PXN PE=1 SV=3	P49023		PAXI	1207.64	1581.55	1392.9	1171.9	1546.35	1108.85
1400	5308	P11310|ACADM_HUMAN	214.93	46588	7	26	Medium-chain specific acyl-CoA dehydrogenase mitochondrial OS=Homo sapiens OX=9606 GN=ACADM PE=1 SV=1	P11310		ACADM	642.72	753.88	1104.4	1659.2	1083.05	1074.45
1509	2960	P36542|ATPG_HUMAN	192.89	32996	5	20	ATP synthase subunit gamma mitochondrial OS=Homo sapiens OX=9606 GN=ATP5F1C PE=1 SV=1	P36542		ATPG	800.28	1290.5	879.27	910.27	1256.75	1040.2
506	1718	P12429|ANXA3_HUMAN	283	36375	15	50	Annexin A3 OS=Homo sapiens OX=9606 GN=ANXA3 PE=1 SV=3	P12429		ANXA3	4210.6	3613.55	3697.95	1452.35	1395.8	1191.95
1154	1510	P26006-1|ITA3_HUMAN	257.19	118756	13	18	Isoform 2 of Integrin alpha-3 OS=Homo sapiens OX=9606 GN=ITGA3	P26006	1	ITA3	746.07	795.98	694.3	809.43	820.19	950.48
2078	6124	O75880|SCO1_HUMAN	164.01	33814	3	18	Protein SCO1 homolog mitochondrial OS=Homo sapiens OX=9606 GN=SCO1 PE=1 SV=1	O75880		SCO1	635.97	435	580.41	902.37	694.48	885.48
3988	10024	Q9UG01|IF172_HUMAN	43.47	197575	1	1	Intraflagellar transport protein 172 homolog OS=Homo sapiens OX=9606 GN=IFT172 PE=1 SV=2	Q9UG01		IF172	0	0	937.56	0	1053.3	1019.2
1371	4232	P40937|RFC5_HUMAN	255.13	38497	8	34	Replication factor C subunit 5 OS=Homo sapiens OX=9606 GN=RFC5 PE=1 SV=1	P40937		RFC5	712.04	700.61	617.47	1147.45	864.19	1033.3
2381	5803	O43291|SPIT2_HUMAN	129.69	28228	3	27	Kunitz-type protease inhibitor 2 OS=Homo sapiens OX=9606 GN=SPINT2 PE=1 SV=2	O43291		SPIT2	746.5	886.42	764.13	1020.3	911.41	1025.45
1224	849	Q9NQW6-2|ANLN_HUMAN	243.89	120016	13	17	Isoform 2 of Anillin OS=Homo sapiens OX=9606 GN=ANLN	Q9NQW6	2	ANLN	71.01	192.93	137.26	691.45	548.3	936.59
1350	4381	Q99848|EBP2_HUMAN	239.08	34852	7	25	Probable rRNA-processing protein EBP2 OS=Homo sapiens OX=9606 GN=EBNA1BP2 PE=1 SV=2	Q99848		EBP2	931.46	754.34	928.46	1014.75	992.92	1027.3
2958	5317	O14929|HAT1_HUMAN	152.31	49513	6	31	Histone acetyltransferase type B catalytic subunit OS=Homo sapiens OX=9606 GN=HAT1 PE=1 SV=1	O14929		HAT1	230.3	0	196.71	600.56	502.35	919.3
708	1558	P55084|ECHB_HUMAN	303.66	51294	16	47	Trifunctional enzyme subunit beta mitochondrial OS=Homo sapiens OX=9606 GN=HADHB PE=1 SV=3	P55084		ECHB	528.02	763.87	349.65	1375.6	1504.1	1237.85
1521	3111	Q13867|BLMH_HUMAN	213.62	52562	5	16	Bleomycin hydrolase OS=Homo sapiens OX=9606 GN=BLMH PE=1 SV=1	Q13867		BLMH	399.75	287.48	271.32	444.67	673.17	825.84
1330	3287	Q96DG6|CMBL_HUMAN	228.33	28048	6	33	Carboxymethylenebutenolidase homolog OS=Homo sapiens OX=9606 GN=CMBL PE=1 SV=1	Q96DG6		CMBL	589.32	579.16	699.34	732.2	749.06	924.9
613	1439	P09960|LKHA4_HUMAN	323.12	69285	12	31	Leukotriene A-4 hydrolase OS=Homo sapiens OX=9606 GN=LTA4H PE=1 SV=2	P09960		LKHA4	1762.6	1974	1306.1	1482.2	1453.45	1170.1
950	2101	O43747-2|AP1G1_HUMAN	253.48	91723	10	17	Isoform 2 of AP-1 complex subunit gamma-1 OS=Homo sapiens OX=9606 GN=AP1G1	O43747	2	AP1G1	838.44	635.48	704.33	1073.35	540.17	1022.9
1179	6293	P10620|MGST1_HUMAN	217.02	17599	5	39	Microsomal glutathione S-transferase 1 OS=Homo sapiens OX=9606 GN=MGST1 PE=1 SV=1	P10620		MGST1	150.45	827.59	635.18	818.01	919.04	944.68
581	1313	O75390|CISY_HUMAN	272.59	51712	14	37	Citrate synthase mitochondrial OS=Homo sapiens OX=9606 GN=CS PE=1 SV=2	O75390		CISY	1384.81	1499.4	1202.95	3311.75	1338.35	1189.15
914	1839	Q8NBS9|TXND5_HUMAN	261.43	47629	10	38	Thioredoxin domain-containing protein 5 OS=Homo sapiens OX=9606 GN=TXNDC5 PE=1 SV=2	Q8NBS9		TXND5	760.12	916.04	855.77	817.61	932.61	949.16
744	660	Q5GLZ8-3|HERC4_HUMAN	289.87	109585	16	25	Isoform 3 of Probable E3 ubiquitin-protein ligase HERC4 OS=Homo sapiens OX=9606 GN=HERC4	Q5GLZ8	3	HERC4	680.37	671.47	534.04	892.23	665.44	930.92
974	2253	Q9Y6Y8|S23IP_HUMAN	255.21	111076	10	16	SEC23-interacting protein OS=Homo sapiens OX=9606 GN=SEC23IP PE=1 SV=1	Q9Y6Y8		S23IP	775.59	388.55	557.03	693.09	719.5	859.77
518	2605	Q92688|AN32B_HUMAN	261.14	28788	8	53	Acidic leucine-rich nuclear phosphoprotein 32 family member B OS=Homo sapiens OX=9606 GN=ANP32B PE=1 SV=1	Q92688		AN32B	1240.75	1510.95	819.47	1351.3	1351.5	1164.8
1251	1878	Q15785|TOM34_HUMAN	242.26	34559	13	51	Mitochondrial import receptor subunit TOM34 OS=Homo sapiens OX=9606 GN=TOMM34 PE=1 SV=2	Q15785		TOM34	685.4	688.7	621.61	821.74	947.55	972.53
1151	8883	P53634|CATC_HUMAN	224.94	51854	6	14	Dipeptidyl peptidase 1 OS=Homo sapiens OX=9606 GN=CTSC PE=1 SV=2	P53634		CATC	1459.2	1013.13	825.46	1933.85	1227.13	1271.7
1399	1528	Q92896-2|GSLG1_HUMAN	282.08	137222	13	17	Isoform 2 of Golgi apparatus protein 1 OS=Homo sapiens OX=9606 GN=GLG1	Q92896	2	GSLG1	262.77	237.83	336.19	885.63	704.79	944.06
1196	3052	P17301|ITA2_HUMAN	226.34	129295	8	10	Integrin alpha-2 OS=Homo sapiens OX=9606 GN=ITGA2 PE=1 SV=1	P17301		ITA2	1036.6	880.84	1027.12	1012.9	983.95	1007.3
573	733	O00567|NOP56_HUMAN	308.99	66050	21	45	Nucleolar protein 56 OS=Homo sapiens OX=9606 GN=NOP56 PE=1 SV=4	O00567		NOP56	1701.6	1386.45	1520	1268.25	1211.51	1042.25
721	4422	P22061-2|PIMT_HUMAN	300.2	24679	9	72	Isoform 2 of Protein-L-isoaspartate(D-aspartate) O-methyltransferase OS=Homo sapiens OX=9606 GN=PCMT1	P22061	2	PIMT	1800.9	828.71	1263.2	1381.6	1588.35	1044
785	2254	P60228|EIF3E_HUMAN	258.16	52221	9	34	Eukaryotic translation initiation factor 3 subunit E OS=Homo sapiens OX=9606 GN=EIF3E PE=1 SV=1	P60228		EIF3E	1189.45	990.23	948.83	858.29	910.22	950.39
1344	2817	P48163|MAOX_HUMAN	248.13	64150	10	27	NADP-dependent malic enzyme OS=Homo sapiens OX=9606 GN=ME1 PE=1 SV=1	P48163		MAOX	445.41	357.81	835.71	448.22	370.05	779.19
900	2847	Q8IWE2|NXP20_HUMAN	275.1	60742	8	26	Protein NOXP20 OS=Homo sapiens OX=9606 GN=FAM114A1 PE=1 SV=2	Q8IWE2		NXP20	1091.45	1051.25	1054.54	1115.95	1047.75	1025.79
739	1178	P49756|RBM25_HUMAN	275.23	100186	16	23	RNA-binding protein 25 OS=Homo sapiens OX=9606 GN=RBM25 PE=1 SV=3	P49756		RBM25	1080.6	696.26	1138.3	1129.72	1134.5	1042.74
660	1291	O15067|PUR4_HUMAN	338.01	144734	14	18	Phosphoribosylformylglycinamidine synthase OS=Homo sapiens OX=9606 GN=PFAS PE=1 SV=4	O15067		PUR4	1639.9	1290.85	1775.4	1974.95	1712.25	1359.1
1338	2300	P35659|DEK_HUMAN	210.86	42674	10	20	Protein DEK OS=Homo sapiens OX=9606 GN=DEK PE=1 SV=1	P35659		DEK	551.49	607.5	579.8	1065.7	919.62	1016.98
1812	9457	O15260|SURF4_HUMAN	118.63	30394	2	12	Surfeit locus protein 4 OS=Homo sapiens OX=9606 GN=SURF4 PE=1 SV=3	O15260		SURF4	219.36	405.65	522.75	483.79	648.13	891.19
947	1094	P11717|MPRI_HUMAN	286.05	274373	14	7	Cation-independent mannose-6-phosphate receptor OS=Homo sapiens OX=9606 GN=IGF2R PE=1 SV=3	P11717		MPRI	488.63	497.16	508.69	1138.95	1046.48	1007.82
763	4460	Q15165-1|PON2_HUMAN	294.41	39382	11	52	Isoform 1 of Serum paraoxonase/arylesterase 2 OS=Homo sapiens OX=9606 GN=PON2	Q15165	1	PON2	479.8	899.01	703.29	1101.15	979.57	1002.47
1417	4482	Q8TCJ2|STT3B_HUMAN	230.34	93674	6	9	Dolichyl-diphosphooligosaccharide--protein glycosyltransferase subunit STT3B OS=Homo sapiens OX=9606 GN=STT3B PE=1 SV=1	Q8TCJ2		STT3B	990.28	992.97	906.78	730.8	1052.6	1009.49
249	303	Q9UPN3-3|MACF1_HUMAN	410.35	614160	55	17	Isoform 3 of Microtubule-actin cross-linking factor 1 isoforms 1/2/3/5 OS=Homo sapiens OX=9606 GN=MACF1	Q9UPN3	3	MACF1	1229.6	1022.7	987.23	1016.38	1235.85	1043.99
1066	3482	P51398|RT29_HUMAN	257.53	45566	7	23	28S ribosomal protein S29 mitochondrial OS=Homo sapiens OX=9606 GN=DAP3 PE=1 SV=1	P51398		RT29	410.99	377.7	218.59	961.14	660.64	924.71
915	3540	P12004|PCNA_HUMAN	246.2	28769	8	55	Proliferating cell nuclear antigen OS=Homo sapiens OX=9606 GN=PCNA PE=1 SV=1	P12004		PCNA	887.22	916.62	824.46	645.57	1040.8	978.42
951	2114	P39656|OST48_HUMAN	284	50801	11	43	Dolichyl-diphosphooligosaccharide--protein glycosyltransferase 48 kDa subunit OS=Homo sapiens OX=9606 GN=DDOST PE=1 SV=4	P39656		OST48	1312.2	774.39	409.01	855.2	1217.2	1075.51
584	1582	Q13501|SQSTM_HUMAN	267.23	47687	12	50	Sequestosome-1 OS=Homo sapiens OX=9606 GN=SQSTM1 PE=1 SV=1	Q13501		SQSTM	2279.95	2305.15	2370.65	1102.58	939.84	979.19
1187	1939	Q5JRX3|PREP_HUMAN	249.32	117413	13	20	Presequence protease mitochondrial OS=Homo sapiens OX=9606 GN=PITRM1 PE=1 SV=3	Q5JRX3		PREP	439.43	324.31	401.28	888.65	898.25	956.97
1045	1108	P23921|RIR1_HUMAN	284.63	90070	15	27	Ribonucleoside-diphosphate reductase large subunit OS=Homo sapiens OX=9606 GN=RRM1 PE=1 SV=1	P23921		RIR1	739.48	662.04	598.63	978.64	968.4	982.34
1973	5121	P36543|VATE1_HUMAN	199.17	26145	5	29	V-type proton ATPase subunit E 1 OS=Homo sapiens OX=9606 GN=ATP6V1E1 PE=1 SV=1	P36543		VATE1	796.26	796.24	832.75	987.01	960.29	971.11
955	4487	P30043|BLVRB_HUMAN	265.8	22119	10	75	Flavin reductase (NADPH) OS=Homo sapiens OX=9606 GN=BLVRB PE=1 SV=3	P30043		BLVRB	1021.06	1372.7	1239.7	695.49	748.03	972.26
1055	1095	P40222|TXLNA_HUMAN	266.67	61891	14	43	Alpha-taxilin OS=Homo sapiens OX=9606 GN=TXLNA PE=1 SV=3	P40222		TXLNA	793.15	844.27	949.12	1219.6	1102.75	1066.27
845	1798	Q9NV70-2|EXOC1_HUMAN	256.17	100283	10	24	Isoform 2 of Exocyst complex component 1 OS=Homo sapiens OX=9606 GN=EXOC1	Q9NV70	2	EXOC1	782.22	664.82	549.75	1066.25	899.82	967.81
1510	5558	O43324|MCA3_HUMAN	201.04	19811	4	34	Eukaryotic translation elongation factor 1 epsilon-1 OS=Homo sapiens OX=9606 GN=EEF1E1 PE=1 SV=1	O43324		MCA3	471.35	770.32	714.44	812.51	778.63	921.46
1981	5713	P37108|SRP14_HUMAN	187.84	14570	5	37	Signal recognition particle 14 kDa protein OS=Homo sapiens OX=9606 GN=SRP14 PE=1 SV=2	P37108		SRP14	31.46	747.74	755.98	1034.13	1177.3	1036.16
841	1628	P30419|NMT1_HUMAN	308.64	56806	13	33	Glycylpeptide N-tetradecanoyltransferase 1 OS=Homo sapiens OX=9606 GN=NMT1 PE=1 SV=2	P30419		NMT1	765.24	888.9	911.24	957.76	867.81	926.26
765	530	Q15021|CND1_HUMAN	313.24	157182	21	24	Condensin complex subunit 1 OS=Homo sapiens OX=9606 GN=NCAPD2 PE=1 SV=3	Q15021		CND1	581.56	450.74	564.42	993.85	1187.1	1013.82
863	2200	O75436|VP26A_HUMAN	254.37	38170	10	44	Vacuolar protein sorting-associated protein 26A OS=Homo sapiens OX=9606 GN=VPS26A PE=1 SV=2	O75436		VP26A	1450.6	1443.4	1098.3	370.31	826.59	726.2
846	1537	Q8N766|EMC1_HUMAN	271.82	111759	15	23	ER membrane protein complex subunit 1 OS=Homo sapiens OX=9606 GN=EMC1 PE=1 SV=1	Q8N766		EMC1	337.06	250.37	281.84	858.44	686.38	895.65
1227	3957	P39748|FEN1_HUMAN	257.11	42593	10	44	Flap endonuclease 1 OS=Homo sapiens OX=9606 GN=FEN1 PE=1 SV=1	P39748		FEN1	787.94	670.41	902.59	1153.85	1306.95	1074.82
1030	2591	Q9UHG3|PCYOX_HUMAN	269.97	56640	11	30	Prenylcysteine oxidase 1 OS=Homo sapiens OX=9606 GN=PCYOX1 PE=1 SV=3	Q9UHG3		PCYOX	815.27	716.21	637.03	758.65	965.08	946.36
1031	2055	P36551|HEM6_HUMAN	266.32	50152	12	27	Oxygen-dependent coproporphyrinogen-III oxidase mitochondrial OS=Homo sapiens OX=9606 GN=CPOX PE=1 SV=3	P36551		HEM6	422.04	401.79	369.95	1027.52	873.45	927.43
384	2378	P15121|ALDR_HUMAN	299.47	35853	10	55	Aldo-keto reductase family 1 member B1 OS=Homo sapiens OX=9606 GN=AKR1B1 PE=1 SV=3	P15121		ALDR	2486.7	1453.6	1680.35	2744.05	2519.2	1681.7
964	5006	P63000-2|RAC1_HUMAN	214.39	23467	4	27	Isoform B of Ras-related C3 botulinum toxin substrate 1 OS=Homo sapiens OX=9606 GN=RAC1	P63000	2	RAC1	956.83	886.13	530.47	755.6	554.02	755.17
805	2107	Q14677|EPN4_HUMAN	273.14	68259	11	20	Clathrin interactor 1 OS=Homo sapiens OX=9606 GN=CLINT1 PE=1 SV=1	Q14677		EPN4	1155.05	1121.85	905.99	1167.85	1224.6	1052.63
2153	4473	O43765|SGTA_HUMAN	163.85	34063	4	15	Small glutamine-rich tetratricopeptide repeat-containing protein alpha OS=Homo sapiens OX=9606 GN=SGTA PE=1 SV=1	O43765		SGTA	480.1	433.29	503.01	587.62	664.14	786.83
1240	3057	P12081|HARS1_HUMAN	238.49	57411	8	22	Histidine--tRNA ligase cytoplasmic OS=Homo sapiens OX=9606 GN=HARS1 PE=1 SV=2	P12081		HARS1	875.4	466.9	680.95	1008.2	945.88	973.56
1342	2854	P22570-7|ADRO_HUMAN	253.92	57370	9	27	Isoform 7 of NADPH:adrenodoxin oxidoreductase mitochondrial OS=Homo sapiens OX=9606 GN=FDXR	P22570	7	ADRO	345.84	445.74	504.77	479.65	400.99	763.15
1101	2954	P46379|BAG6_HUMAN	245.69	119409	7	12	Large proline-rich protein BAG6 OS=Homo sapiens OX=9606 GN=BAG6 PE=1 SV=2	P46379		BAG6	759.8	543.84	602.22	793.13	915.52	910.57
2085	11674	P09669|COX6C_HUMAN	139.44	8781	3	31	Cytochrome c oxidase subunit 6C OS=Homo sapiens OX=9606 GN=COX6C PE=1 SV=2	P09669		COX6C	796.32	236.17	489.32	1060.7	965.73	964.33
1490	2148	P11182|ODB2_HUMAN	230.77	53487	10	36	Lipoamide acyltransferase component of branched-chain alpha-keto acid dehydrogenase complex mitochondrial OS=Homo sapiens OX=9606 GN=DBT PE=1 SV=3	P11182		ODB2	163.33	183.15	208.74	585.23	729	806.3
1869	6343	Q9Y4Z0|LSM4_HUMAN	171.02	15350	3	20	U6 snRNA-associated Sm-like protein LSm4 OS=Homo sapiens OX=9606 GN=LSM4 PE=1 SV=1	Q9Y4Z0		LSM4	860.45	1065.6	1005.99	1048.32	894.37	938.08
2474	6949	Q9H444|CHM4B_HUMAN	125.62	24950	3	16	Charged multivesicular body protein 4b OS=Homo sapiens OX=9606 GN=CHMP4B PE=1 SV=1	Q9H444		CHM4B	924.74	539.02	852.06	1018.7	1010.45	975.39
1256	3246	P40938|RFC3_HUMAN	257.97	40556	8	28	Replication factor C subunit 3 OS=Homo sapiens OX=9606 GN=RFC3 PE=1 SV=2	P40938		RFC3	508.08	454.64	595.69	747.8	872.98	914.85
1349	6470	Q01130|SRSF2_HUMAN	118.42	25476	2	9	Serine/arginine-rich splicing factor 2 OS=Homo sapiens OX=9606 GN=SRSF2 PE=1 SV=4	Q01130		SRSF2	1081.95	1525	548.73	22.85	177.08	534.43
810	839	P29144|TPP2_HUMAN	271.41	138350	18	22	Tripeptidyl-peptidase 2 OS=Homo sapiens OX=9606 GN=TPP2 PE=1 SV=4	P29144		TPP2	920.16	898.69	945.33	1219.2	969.61	966.51
1389	6435	Q96K17|BT3L4_HUMAN	266.58	17271	5	64	Transcription factor BTF3 homolog 4 OS=Homo sapiens OX=9606 GN=BTF3L4 PE=1 SV=1	Q96K17		BT3L4	944.75	1140.55	1123.7	1370.55	931.31	1056.33
809	1841	Q13617-2|CUL2_HUMAN	283.65	89492	11	20	Isoform 2 of Cullin-2 OS=Homo sapiens OX=9606 GN=CUL2	Q13617	2	CUL2	726.85	893.78	734.4	794.92	815.55	877.53
1239	4224	P54709|AT1B3_HUMAN	215.72	31513	8	46	Sodium/potassium-transporting ATPase subunit beta-3 OS=Homo sapiens OX=9606 GN=ATP1B3 PE=1 SV=1	P54709		AT1B3	905.62	1008.54	468.48	857.03	681.17	879.38
591	952	Q9H0D6|XRN2_HUMAN	318.75	108583	22	44	5'-3' exoribonuclease 2 OS=Homo sapiens OX=9606 GN=XRN2 PE=1 SV=1	Q9H0D6		XRN2	854.72	2083.3	1276.05	1343.84	1216.01	931.05
1735	5694	Q8WW12|PCNP_HUMAN	177.78	18925	3	24	PEST proteolytic signal-containing nuclear protein OS=Homo sapiens OX=9606 GN=PCNP PE=1 SV=2	Q8WW12		PCNP	1024.98	716.22	1054.86	904.97	918.09	930.12
1020	1131	Q6ZRV2|FA83H_HUMAN	281.94	127122	11	15	Protein FAM83H OS=Homo sapiens OX=9606 GN=FAM83H PE=1 SV=3	Q6ZRV2		FA83H	834.77	618.74	725.3	1128.65	882.62	928.27
1221	3370	P54619|AAKG1_HUMAN	235.33	37579	6	30	5'-AMP-activated protein kinase subunit gamma-1 OS=Homo sapiens OX=9606 GN=PRKAG1 PE=1 SV=1	P54619		AAKG1	760.23	891.71	576.82	1078	627.57	927.66
1703	5303	P98179|RBM3_HUMAN	172.12	17170	3	41	RNA-binding protein 3 OS=Homo sapiens OX=9606 GN=RBM3 PE=1 SV=1	P98179		RBM3	602.78	562.17	641.14	627.58	656.05	789.08
939	3697	Q5VW32|BROX_HUMAN	285.9	46476	9	31	BRO1 domain-containing protein BROX OS=Homo sapiens OX=9606 GN=BROX PE=1 SV=1	Q5VW32		BROX	748.42	687.66	473.52	696.16	781.47	845.83
1599	2026	P31153|METK2_HUMAN	233.35	43661	9	32	S-adenosylmethionine synthase isoform type-2 OS=Homo sapiens OX=9606 GN=MAT2A PE=1 SV=1	P31153		METK2	872.64	643.94	721.51	998.69	984.33	960.74
948	5627	P53985|MOT1_HUMAN	261.15	53944	7	12	Monocarboxylate transporter 1 OS=Homo sapiens OX=9606 GN=SLC16A1 PE=1 SV=3	P53985		MOT1	844.53	644.33	891.33	1003.58	1141.45	1004.65
1896	9896	P62330|ARF6_HUMAN	193.34	20082	5	41	ADP-ribosylation factor 6 OS=Homo sapiens OX=9606 GN=ARF6 PE=1 SV=2	P62330		ARF6	1245.15	1216.55	1202	936.71	817.21	916.49
1291	3090	P46977|STT3A_HUMAN	240.82	80530	10	18	Dolichyl-diphosphooligosaccharide--protein glycosyltransferase subunit STT3A OS=Homo sapiens OX=9606 GN=STT3A PE=1 SV=2	P46977		STT3A	702.01	1093.4	641.3	1043.65	814.56	977.24
1397	3343	O00273|DFFA_HUMAN	235.04	36522	7	26	DNA fragmentation factor subunit alpha OS=Homo sapiens OX=9606 GN=DFFA PE=1 SV=1	O00273		DFFA	560.41	763.56	820.36	1137.25	954.7	974.33
994	3565	P13807|GYS1_HUMAN	270.9	83786	9	16	Glycogen [starch] synthase muscle OS=Homo sapiens OX=9606 GN=GYS1 PE=1 SV=2	P13807		GYS1	636.58	766.67	770.46	1038.08	1002.83	937.1
1113	1919	Q9HAV4|XPO5_HUMAN	231.29	136311	10	14	Exportin-5 OS=Homo sapiens OX=9606 GN=XPO5 PE=1 SV=1	Q9HAV4		XPO5	690.83	519.34	783.03	954.18	780.28	913.46
1403	4294	Q15717-2|ELAV1_HUMAN	236.17	38996	7	23	Isoform 2 of ELAV-like protein 1 OS=Homo sapiens OX=9606 GN=ELAVL1	Q15717	2	ELAV1	1139.96	819.35	751.5	990.78	1080.05	965.49
1596	3751	O75822|EIF3J_HUMAN	209.56	29062	7	23	Eukaryotic translation initiation factor 3 subunit J OS=Homo sapiens OX=9606 GN=EIF3J PE=1 SV=2	O75822		EIF3J	794.28	1251.55	836.42	904.14	785.87	880.26
1123	1598	Q9NSD9|SYFB_HUMAN	251.88	66116	12	26	Phenylalanine--tRNA ligase beta subunit OS=Homo sapiens OX=9606 GN=FARSB PE=1 SV=3	Q9NSD9		SYFB	791.45	1073.28	1149.6	822.84	964.93	929.83
938	1588	P08581|MET_HUMAN	263.28	155541	14	14	Hepatocyte growth factor receptor OS=Homo sapiens OX=9606 GN=MET PE=1 SV=4	P08581		MET	552.67	347.62	332.32	551.78	691.13	788.76
646	1227	Q9BYX2|TBD2A_HUMAN	302.56	105414	19	27	TBC1 domain family member 2A OS=Homo sapiens OX=9606 GN=TBC1D2 PE=1 SV=3	Q9BYX2		TBD2A	1119.73	589.67	781.64	1107.56	916.51	922.67
1522	5477	P11177-2|ODPB_HUMAN	208.82	37200	6	32	Isoform 2 of Pyruvate dehydrogenase E1 component subunit beta mitochondrial OS=Homo sapiens OX=9606 GN=PDHB	P11177	2	ODPB	718.77	675.49	360.86	1004.54	1059.87	941.04
1394	1701	Q16222|UAP1_HUMAN	240.18	58769	10	28	UDP-N-acetylhexosamine pyrophosphorylase OS=Homo sapiens OX=9606 GN=UAP1 PE=1 SV=3	Q16222		UAP1	1139.65	982.74	962.32	785.16	795.72	880.73
1226	1936	Q5JWF2-2|GNAS1_HUMAN	280.26	109626	12	13	Isoform XLas-2 of Guanine nucleotide-binding protein G(s) subunit alpha isoforms XLas OS=Homo sapiens OX=9606 GN=GNAS	Q5JWF2	2	GNAS1	829.84	791.11	756.16	993.18	673.98	902.59
1219	1962	Q13098-5|CSN1_HUMAN	257.45	55093	10	28	Isoform 4 of COP9 signalosome complex subunit 1 OS=Homo sapiens OX=9606 GN=GPS1	Q13098	5	CSN1	618.66	806.47	690.6	689.71	723.29	899.54
1028	1804	O75821|EIF3G_HUMAN	262.97	35611	14	53	Eukaryotic translation initiation factor 3 subunit G OS=Homo sapiens OX=9606 GN=EIF3G PE=1 SV=2	O75821		EIF3G	953.7	1180.75	812.35	698.45	598.63	781.79
1493	5018	O95372|LYPA2_HUMAN	224.8	24737	4	38	Acyl-protein thioesterase 2 OS=Homo sapiens OX=9606 GN=LYPLA2 PE=1 SV=1	O95372		LYPA2	739.88	575.01	678.93	838.72	1004.32	893.32
1660	6728	Q92947|GCDH_HUMAN	212.49	48127	4	18	Glutaryl-CoA dehydrogenase mitochondrial OS=Homo sapiens OX=9606 GN=GCDH PE=1 SV=1	Q92947		GCDH	768.27	832.38	1885.98	948.56	966.71	918.04
1180	8310	P62847-4|RS24_HUMAN	190.67	32431	5	14	Isoform 4 of 40S ribosomal protein S24 OS=Homo sapiens OX=9606 GN=RPS24	P62847	4	RS24	742.69	835.08	665.45	860.44	381.93	864.02
1360	5383	Q9H9J2|RM44_HUMAN	229.3	37535	8	30	39S ribosomal protein L44 mitochondrial OS=Homo sapiens OX=9606 GN=MRPL44 PE=1 SV=1	Q9H9J2		RM44	350.04	333	322.23	618.68	722.03	798.51
714	1956	Q16719|KYNU_HUMAN	308.81	52352	12	37	Kynureninase OS=Homo sapiens OX=9606 GN=KYNU PE=1 SV=1	Q16719		KYNU	1215.85	734.83	853.56	1115.78	1071.88	909.32
925	2192	P30740|ILEU_HUMAN	256.71	42742	10	41	Leukocyte elastase inhibitor OS=Homo sapiens OX=9606 GN=SERPINB1 PE=1 SV=1	P30740		ILEU	1333.3	944.64	1169.24	728.24	768.36	824.71
990	1542	O14744|ANM5_HUMAN	295.98	72684	12	30	Protein arginine N-methyltransferase 5 OS=Homo sapiens OX=9606 GN=PRMT5 PE=1 SV=4	O14744		ANM5	1012.4	1118.15	1137.92	1222.6	1054.24	1006.31
529	898	O43592|XPOT_HUMAN	301.88	109964	18	28	Exportin-T OS=Homo sapiens OX=9606 GN=XPOT PE=1 SV=2	O43592		XPOT	2492.55	2162.8	2364.1	1842.55	1860.1	1346.6
1023	886	Q15642-3|CIP4_HUMAN	269.47	67603	13	34	Isoform 3 of Cdc42-interacting protein 4 OS=Homo sapiens OX=9606 GN=TRIP10	Q15642	3	CIP4	1458.41	485.96	543.61	597.68	714.9	778.85
1699	4934	Q9BQ69|MACD1_HUMAN	177.58	35505	5	22	ADP-ribose glycohydrolase MACROD1 OS=Homo sapiens OX=9606 GN=MACROD1 PE=1 SV=2	Q9BQ69		MACD1	304.21	868.07	805.2	1143.7	792.52	880.82
504	1848	P27348|1433T_HUMAN	257.09	27764	8	49	14-3-3 protein theta OS=Homo sapiens OX=9606 GN=YWHAQ PE=1 SV=1	P27348		1433T	941.63	963.85	974.01	978.51	796.89	878.52
1325	6941	P53004|BIEA_HUMAN	197.76	33428	6	24	Biliverdin reductase A OS=Homo sapiens OX=9606 GN=BLVRA PE=1 SV=2	P53004		BIEA	708.7	1368.35	1097.63	1312.65	780.53	877.83
644	118	Q15075|EEA1_HUMAN	322.46	162465	21	20	Early endosome antigen 1 OS=Homo sapiens OX=9606 GN=EEA1 PE=1 SV=2	Q15075		EEA1	386.93	589.15	571.92	774.54	606.02	780.93
1095	1931	P62495|ERF1_HUMAN	246.25	49031	10	33	Eukaryotic peptide chain release factor subunit 1 OS=Homo sapiens OX=9606 GN=ETF1 PE=1 SV=3	P62495		ERF1	788.37	868.03	686.46	669.8	448.36	772.21
1748	7667	Q9P1F3|ABRAL_HUMAN	169.96	9056	4	40	Costars family protein ABRACL OS=Homo sapiens OX=9606 GN=ABRACL PE=1 SV=1	Q9P1F3		ABRAL	434.04	235.6	344.79	583.13	643.94	741.94
1983	1866	Q7Z4V5-3|HDGR2_HUMAN	204.22	74816	9	23	Isoform 3 of Hepatoma-derived growth factor-related protein 2 OS=Homo sapiens OX=9606 GN=HDGFL2	Q7Z4V5	3	HDGR2	81.18	0	34.78	311.81	234.11	671.36
1033	2478	Q5BKZ1|ZN326_HUMAN	274.57	65654	11	23	DBIRD complex subunit ZNF326 OS=Homo sapiens OX=9606 GN=ZNF326 PE=1 SV=2	Q5BKZ1		ZN326	749.41	641.52	520.26	659.67	573.23	758.74
1779	5207	P14678-3|RSMB_HUMAN	176.36	30032	5	19	Isoform SM-B1 of Small nuclear ribonucleoprotein-associated proteins B and B' OS=Homo sapiens OX=9606 GN=SNRPB	P14678	3	RSMB	871.79	992.88	1429.25	864.01	606.96	861.4
1222	6448	P99999|CYC_HUMAN	220.55	11749	6	46	Cytochrome c OS=Homo sapiens OX=9606 GN=CYCS PE=1 SV=2	P99999		CYC	1037.95	1023.9	1018.65	723.18	763.25	804.48
958	2076	P20042|IF2B_HUMAN	261.97	38388	11	41	Eukaryotic translation initiation factor 2 subunit 2 OS=Homo sapiens OX=9606 GN=EIF2S2 PE=1 SV=2	P20042		IF2B	1289.55	1026.91	1020.45	801.5	516.65	823.62
1092	1348	P19838|NFKB1_HUMAN	303.68	105356	12	19	Nuclear factor NF-kappa-B p105 subunit OS=Homo sapiens OX=9606 GN=NFKB1 PE=1 SV=2	P19838		NFKB1	764.22	962.7	629.83	806.66	894.15	869.03
568	456	P11498|PYC_HUMAN	348.76	129634	20	31	Pyruvate carboxylase mitochondrial OS=Homo sapiens OX=9606 GN=PC PE=1 SV=2	P11498		PYC	507.48	322.5	392.69	643.81	905.53	867.12
1663	4485	P61026|RAB10_HUMAN	198.36	22541	4	36	Ras-related protein Rab-10 OS=Homo sapiens OX=9606 GN=RAB10 PE=1 SV=1	P61026		RAB10	898.95	910.74	852.11	788.72	842.72	856
1647	3712	Q96G23|CERS2_HUMAN	226.69	44876	6	20	Ceramide synthase 2 OS=Homo sapiens OX=9606 GN=CERS2 PE=1 SV=1	Q96G23		CERS2	119.34	168.35	202.36	1025.48	716.07	927.02
1142	2091	Q12765-2|SCRN1_HUMAN	199.2	48714	7	27	Isoform 2 of Secernin-1 OS=Homo sapiens OX=9606 GN=SCRN1	Q12765	2	SCRN1	581.06	516.89	482.18	785.78	746.43	848.89
1407	1802	Q9HC35|EMAL4_HUMAN	260.27	108916	7	13	Echinoderm microtubule-associated protein-like 4 OS=Homo sapiens OX=9606 GN=EML4 PE=1 SV=3	Q9HC35		EMAL4	455.76	657.87	644.23	599.91	690.38	758.95
403	338	P49792|RBP2_HUMAN	385.36	358201	30	18	E3 SUMO-protein ligase RanBP2 OS=Homo sapiens OX=9606 GN=RANBP2 PE=1 SV=2	P49792		RBP2	1264.35	1153.5	1165	1232.45	1133.79	999.32
1645	4404	Q96C36|P5CR2_HUMAN	233.23	33637	7	44	Pyrroline-5-carboxylate reductase 2 OS=Homo sapiens OX=9606 GN=PYCR2 PE=1 SV=1	Q96C36		P5CR2	187.14	57.49	167.18	548.09	232.34	685.36
1075	3953	Q9UBS4|DJB11_HUMAN	247.33	40514	7	22	DnaJ homolog subfamily B member 11 OS=Homo sapiens OX=9606 GN=DNAJB11 PE=1 SV=1	Q9UBS4		DJB11	764.47	831.81	991.53	850.02	747.83	858.29
455	783	Q15042|RB3GP_HUMAN	327.61	110524	17	22	Rab3 GTPase-activating protein catalytic subunit OS=Homo sapiens OX=9606 GN=RAB3GAP1 PE=1 SV=3	Q15042		RB3GP	1290.35	1602.95	1540.35	1584.6	1183.7	1049.88
3163	6121	Q04206-4|TF65_HUMAN	133.76	59910	3	9	Isoform 4 of Transcription factor p65 OS=Homo sapiens OX=9606 GN=RELA	Q04206	4	TF65	61.85	53.09	72.91	76.46	58.93	464.36
993	2533	Q9BR76|COR1B_HUMAN	242.93	54235	10	37	Coronin-1B OS=Homo sapiens OX=9606 GN=CORO1B PE=1 SV=1	Q9BR76		COR1B	907.11	1011.54	1068.9	1495.65	1199.75	1008.23
957	1797	P29692|EF1D_HUMAN	276.99	31122	1	46	Elongation factor 1-delta OS=Homo sapiens OX=9606 GN=EEF1D PE=1 SV=5	P29692		EF1D	862.17	871.16	962.81	917.23	854.41	860.62
520	272	P42345|MTOR_HUMAN	345.14	288890	26	16	Serine/threonine-protein kinase mTOR OS=Homo sapiens OX=9606 GN=MTOR PE=1 SV=1	P42345		MTOR	1335.8	1180.95	1843.2	1536.66	1728.4	1197.92
1564	5289	P08574|CY1_HUMAN	205.52	35422	6	23	Cytochrome c1 heme protein mitochondrial OS=Homo sapiens OX=9606 GN=CYC1 PE=1 SV=3	P08574		CY1	699.1	417.05	879.87	1071.18	944.12	903.67
1218	2921	P43246|MSH2_HUMAN	254.54	104743	10	16	DNA mismatch repair protein Msh2 OS=Homo sapiens OX=9606 GN=MSH2 PE=1 SV=1	P43246		MSH2	686.15	609.52	248.57	335.75	748.61	734.33
1886	6465	Q14165|MLEC_HUMAN	188.4	32234	4	20	Malectin OS=Homo sapiens OX=9606 GN=MLEC PE=1 SV=1	Q14165		MLEC	600.28	576.11	798.64	861.05	738.45	832.37
2662	10365	Q15907-2|RB11B_HUMAN	186.61	19971	5	34	Isoform 2 of Ras-related protein Rab-11B OS=Homo sapiens OX=9606 GN=RAB11B	Q15907	2	RB11B	785.27	406.71	655.32	599.47	708.91	743.45
1736	9261	Q9ULZ3-2|ASC_HUMAN	177.56	19969	4	34	Isoform 2 of Apoptosis-associated speck-like protein containing a CARD OS=Homo sapiens OX=9606 GN=PYCARD	Q9ULZ3	2	ASC	496.53	193.93	316.71	621.57	678.15	751.44
1175	1733	Q8WUM0|NU133_HUMAN	254.21	128979	12	19	Nuclear pore complex protein Nup133 OS=Homo sapiens OX=9606 GN=NUP133 PE=1 SV=2	Q8WUM0		NU133	604.21	563.46	555.99	811.94	754.07	826.02
1611	5226	Q9HAW8|UD110_HUMAN	185.44	59810	4	12	UDP-glucuronosyltransferase 1A10 OS=Homo sapiens OX=9606 GN=UGT1A10 PE=1 SV=1	Q9HAW8		UD110	371.54	644.95	515.39	1247.3	635.85	850.95
920	2994	Q9UBQ7|GRHPR_HUMAN	281.72	35668	9	36	Glyoxylate reductase/hydroxypyruvate reductase OS=Homo sapiens OX=9606 GN=GRHPR PE=1 SV=1	Q9UBQ7		GRHPR	678.75	938.9	837.22	1027.59	904.5	876.3
1822	3776	P50914|RL14_HUMAN	161.73	23432	6	27	60S ribosomal protein L14 OS=Homo sapiens OX=9606 GN=RPL14 PE=1 SV=4	P50914		RL14	1918.25	936.02	509.26	982.41	946.44	835.9
1275	2922	P51553-2|IDH3G_HUMAN	221.65	41468	5	23	Isoform 2 of Isocitrate dehydrogenase [NAD] subunit gamma mitochondrial OS=Homo sapiens OX=9606 GN=IDH3G	P51553	2	IDH3G	449.17	414.92	442.79	745.32	858	835.6
868	648	Q9UIG0-2|BAZ1B_HUMAN	296.41	170446	14	16	Isoform 2 of Tyrosine-protein kinase BAZ1B OS=Homo sapiens OX=9606 GN=BAZ1B	Q9UIG0	2	BAZ1B	570.38	557.4	667.45	852.45	899.08	834.56
1294	4102	Q9NYL9|TMOD3_HUMAN	243.99	39595	10	42	Tropomodulin-3 OS=Homo sapiens OX=9606 GN=TMOD3 PE=1 SV=1	Q9NYL9		TMOD3	789.44	727.11	728.21	635.89	858.14	801.32
858	636	Q96A65|EXOC4_HUMAN	296.1	110498	16	24	Exocyst complex component 4 OS=Homo sapiens OX=9606 GN=EXOC4 PE=1 SV=1	Q96A65		EXOC4	679.3	538.49	533.69	890.37	574.6	833.25
624	258	Q9NTI5-2|PDS5B_HUMAN	317	158280	19	22	Isoform 2 of Sister chromatid cohesion protein PDS5 homolog B OS=Homo sapiens OX=9606 GN=PDS5B	Q9NTI5	2	PDS5B	686.56	603.09	484.1	736.59	712.01	790.97
916	1579	Q92888|ARHG1_HUMAN	257.23	102435	10	14	Rho guanine nucleotide exchange factor 1 OS=Homo sapiens OX=9606 GN=ARHGEF1 PE=1 SV=2	Q92888		ARHG1	593.02	613.23	767.92	915.58	575.71	828.42
1263	3685	Q9UKM9-2|RALY_HUMAN	193.19	30364	5	27	Isoform 1 of RNA-binding protein Raly OS=Homo sapiens OX=9606 GN=RALY	Q9UKM9	2	RALY	709.14	751.09	783.44	745.53	559.29	785.25
889	1785	Q9Y314|NOSIP_HUMAN	256.58	33172	11	48	Nitric oxide synthase-interacting protein OS=Homo sapiens OX=9606 GN=NOSIP PE=1 SV=1	Q9Y314		NOSIP	799.43	730.61	777.6	735.14	868.57	824.2
1613	5679	Q9Y3E5|PTH2_HUMAN	184.74	19194	3	27	Peptidyl-tRNA hydrolase 2 mitochondrial OS=Homo sapiens OX=9606 GN=PTRH2 PE=1 SV=1	Q9Y3E5		PTH2	744.78	583.64	675.55	880.6	711.43	824.84
866	890	P42224|STAT1_HUMAN	271.78	87335	15	26	Signal transducer and activator of transcription 1-alpha/beta OS=Homo sapiens OX=9606 GN=STAT1 PE=1 SV=2	P42224		STAT1	1647.15	1320.3	1213.05	510.38	796.09	794.25
886	3321	Q9UN37|VPS4A_HUMAN	256.28	48898	5	20	Vacuolar protein sorting-associated protein 4A OS=Homo sapiens OX=9606 GN=VPS4A PE=1 SV=1	Q9UN37		VPS4A	569.97	677.89	634.24	768.26	658.13	753.72
1073	2001	Q9Y2L1|RRP44_HUMAN	247.59	109003	13	23	Exosome complex exonuclease RRP44 OS=Homo sapiens OX=9606 GN=DIS3 PE=1 SV=2	Q9Y2L1		RRP44	601.1	589.8	811.84	872.95	568.88	817.74
80	280	P16144-2|ITB4_HUMAN	472.75	195012	1	42	Isoform Beta-4A of Integrin beta-4 OS=Homo sapiens OX=9606 GN=ITGB4	P16144	2	ITB4	803.63	826.17	815.02	906.07	877.65	842.73
760	1210	O60885|BRD4_HUMAN	269.49	152218	13	19	Bromodomain-containing protein 4 OS=Homo sapiens OX=9606 GN=BRD4 PE=1 SV=2	O60885		BRD4	646.71	587.04	650.69	664.86	962.95	816.96
1507	4585	Q04760|LGUL_HUMAN	160.08	20778	4	38	Lactoylglutathione lyase OS=Homo sapiens OX=9606 GN=GLO1 PE=1 SV=4	Q04760		LGUL	844.07	873.56	1201.7	846.44	1074.35	816.28
2215	16595	P13987-2|CD59_HUMAN	132.3	14529	2	18	Isoform 2 of CD59 glycoprotein OS=Homo sapiens OX=9606 GN=CD59	P13987	2	CD59	458.31	215.56	292.65	573.45	894.32	850.11
909	3588	Q7L5N1|CSN6_HUMAN	260.95	36163	10	50	COP9 signalosome complex subunit 6 OS=Homo sapiens OX=9606 GN=COPS6 PE=1 SV=1	Q7L5N1		CSN6	993.16	1645.4	1101.52	1416.35	1262.75	1011.57
736	650	Q14690|RRP5_HUMAN	331.96	208699	19	16	Protein RRP5 homolog OS=Homo sapiens OX=9606 GN=PDCD11 PE=1 SV=3	Q14690		RRP5	991.71	1280.35	911.49	1230.7	1084.68	1006.65
1804	2610	Q6P996-4|PDXD1_HUMAN	256.81	83572	9	23	Isoform 4 of Pyridoxal-dependent decarboxylase domain-containing protein 1 OS=Homo sapiens OX=9606 GN=PDXDC1	Q6P996	4	PDXD1	558.62	426.38	712.9	495.36	828.7	812.33
718	2356	P21589|5NTD_HUMAN	290.14	63368	16	37	5'-nucleotidase OS=Homo sapiens OX=9606 GN=NT5E PE=1 SV=1	P21589		5NTD	564.8	687.38	687.11	756.16	1136.59	810.96
1216	2122	Q9NXH9-2|TRM1_HUMAN	264.62	69306	8	19	Isoform 2 of tRNA (guanine(26)-N(2))-dimethyltransferase OS=Homo sapiens OX=9606 GN=TRMT1	Q9NXH9	2	TRM1	456.63	380.29	408.88	560.9	504.19	765.6
742	1649	Q12797|ASPH_HUMAN	275.47	85863	10	24	Aspartyl/asparaginyl beta-hydroxylase OS=Homo sapiens OX=9606 GN=ASPH PE=1 SV=3	Q12797		ASPH	502.15	463.07	557.52	803.2	541.83	756.87
1409	3404	O75439|MPPB_HUMAN	242.64	54366	10	37	Mitochondrial-processing peptidase subunit beta OS=Homo sapiens OX=9606 GN=PMPCB PE=1 SV=2	O75439		MPPB	342.3	395.63	273.4	639.15	665.21	755.56
1859	6130	P30086|PEBP1_HUMAN	203	21057	6	44	Phosphatidylethanolamine-binding protein 1 OS=Homo sapiens OX=9606 GN=PEBP1 PE=1 SV=3	P30086		PEBP1	1021.11	924.92	822.57	825.53	832.52	813.9
1266	725	Q5JTH9-2|RRP12_HUMAN	266.8	132709	17	19	Isoform 2 of RRP12-like protein OS=Homo sapiens OX=9606 GN=RRP12	Q5JTH9	2	RRP12	575.77	494.59	695.96	640.59	672.57	753.61
1665	5535	O75608|LYPA1_HUMAN	242.66	24670	7	64	Acyl-protein thioesterase 1 OS=Homo sapiens OX=9606 GN=LYPLA1 PE=1 SV=1	O75608		LYPA1	574.74	349.6	399.76	516.96	580.21	691.99
1050	2427	O75400|PR40A_HUMAN	262.95	108805	13	19	Pre-mRNA-processing factor 40 homolog A OS=Homo sapiens OX=9606 GN=PRPF40A PE=1 SV=2	O75400		PR40A	993.18	890.29	928.83	1296.95	713.57	804.91
1162	2680	Q9NZL9|MAT2B_HUMAN	251.38	37552	8	40	Methionine adenosyltransferase 2 subunit beta OS=Homo sapiens OX=9606 GN=MAT2B PE=1 SV=1	Q9NZL9		MAT2B	520.83	507.64	542.75	1221.3	899.79	862.55
1027	1307	Q10471|GALT2_HUMAN	266.86	64733	13	31	Polypeptide N-acetylgalactosaminyltransferase 2 OS=Homo sapiens OX=9606 GN=GALNT2 PE=1 SV=1	Q10471		GALT2	288.52	219.21	63.86	646.23	649.4	738.13
1007	2781	P09110|THIK_HUMAN	273.66	44292	11	40	3-ketoacyl-CoA thiolase peroxisomal OS=Homo sapiens OX=9606 GN=ACAA1 PE=1 SV=2	P09110		THIK	496.34	603.37	538.88	800.48	641.84	796.66
2269	8861	Q15287-2|RNPS1_HUMAN	131.66	31709	2	14	Isoform 2 of RNA-binding protein with serine-rich domain 1 OS=Homo sapiens OX=9606 GN=RNPS1	Q15287	2	RNPS1	635.42	113.37	336.32	500.39	541.49	784.54
1466	3453	Q9Y3B3|TMED7_HUMAN	193.48	25172	5	28	Transmembrane emp24 domain-containing protein 7 OS=Homo sapiens OX=9606 GN=TMED7 PE=1 SV=2	Q9Y3B3		TMED7	704	813.58	750.93	643.24	764.14	781.78
772	967	Q8NE71|ABCF1_HUMAN	341.8	95926	18	27	ATP-binding cassette sub-family F member 1 OS=Homo sapiens OX=9606 GN=ABCF1 PE=1 SV=2	Q8NE71		ABCF1	714	1073.2	759.56	995.53	931.31	871.61
1384	3606	Q99986|VRK1_HUMAN	239.22	45476	6	23	Serine/threonine-protein kinase VRK1 OS=Homo sapiens OX=9606 GN=VRK1 PE=1 SV=1	Q99986		VRK1	348.24	471.28	457.73	574.61	705.64	739.82
1047	3299	P09758|TACD2_HUMAN	223.36	35709	8	34	Tumor-associated calcium signal transducer 2 OS=Homo sapiens OX=9606 GN=TACSTD2 PE=1 SV=3	P09758		TACD2	514.48	382.13	506.49	689.12	998.8	787.57
35	10	P02545-2|LMNA_HUMAN	461.14	65135	1	71	Isoform C of Prelamin-A/C OS=Homo sapiens OX=9606 GN=LMNA	P02545	2	LMNA	845.03	883.54	994.63	813.74	849.11	811.19
1310	2661	Q9Y6E2|BZW2_HUMAN	261.64	48162	7	29	Basic leucine zipper and W2 domain-containing protein 2 OS=Homo sapiens OX=9606 GN=BZW2 PE=1 SV=1	Q9Y6E2		BZW2	783.07	775.61	838.58	796.46	771.33	791.29
1520	2078	Q9NXF1-2|TEX10_HUMAN	246.12	103915	11	20	Isoform 2 of Testis-expressed protein 10 OS=Homo sapiens OX=9606 GN=TEX10	Q9NXF1	2	TEX10	389.7	333.81	275.81	620.64	622.42	733.7
2100	9572	Q99471|PFD5_HUMAN	157.61	17328	4	41	Prefoldin subunit 5 OS=Homo sapiens OX=9606 GN=PFDN5 PE=1 SV=2	Q99471		PFD5	403.23	520.07	348.67	621.24	365.27	691.42
1318	3432	Q7Z3B4-3|NUP54_HUMAN	232.23	50776	7	23	Isoform 3 of Nucleoporin p54 OS=Homo sapiens OX=9606 GN=NUP54	Q7Z3B4	3	NUP54	450.82	399.35	452.02	563.88	476.27	635.29
977	3543	Q99733-2|NP1L4_HUMAN	238.36	44079	6	26	Isoform 2 of Nucleosome assembly protein 1-like 4 OS=Homo sapiens OX=9606 GN=NAP1L4	Q99733	2	NP1L4	306.78	127.82	133.72	503.12	660.88	689.5
1405	786	Q02880-2|TOP2B_HUMAN	257.2	182661	14	14	Isoform Beta-1 of DNA topoisomerase 2-beta OS=Homo sapiens OX=9606 GN=TOP2B	Q02880	2	TOP2B	198.06	54.54	98.93	291.96	353.38	547.18
2564	30906	Q9NRP0-2|OSTC_HUMAN	81.07	19171	1	7	Isoform 2 of Oligosaccharyltransferase complex subunit OSTC OS=Homo sapiens OX=9606 GN=OSTC	Q9NRP0	2	OSTC	821.2	319.89	762.36	668.78	735.56	751.68
1540	14717	Q99584|S10AD_HUMAN	192.92	11471	4	22	Protein S100-A13 OS=Homo sapiens OX=9606 GN=S100A13 PE=1 SV=1	Q99584		S10AD	914.12	777.43	883.73	700.61	858.77	760.65
1165	1657	Q9BXJ9|NAA15_HUMAN	266.08	101272	12	21	N-alpha-acetyltransferase 15 NatA auxiliary subunit OS=Homo sapiens OX=9606 GN=NAA15 PE=1 SV=1	Q9BXJ9		NAA15	661.39	737.82	607.27	764.88	473.64	760.17
1078	1460	Q8N8S7|ENAH_HUMAN	272.09	66510	12	24	Protein enabled homolog OS=Homo sapiens OX=9606 GN=ENAH PE=1 SV=2	Q8N8S7		ENAH	775.37	809.84	806.25	887.6	704.97	772.8
935	608	Q14573|ITPR3_HUMAN	292.71	304105	21	12	Inositol 1 4 5-trisphosphate receptor type 3 OS=Homo sapiens OX=9606 GN=ITPR3 PE=1 SV=2	Q14573		ITPR3	492.17	445.14	470.96	878.98	940.84	816.71
1548	2519	P31749|AKT1_HUMAN	227.29	55686	6	20	RAC-alpha serine/threonine-protein kinase OS=Homo sapiens OX=9606 GN=AKT1 PE=1 SV=2	P31749		AKT1	545.99	496.23	526.97	962.25	765.05	796.06
1632	3322	P30837|AL1B1_HUMAN	246.9	57206	12	38	Aldehyde dehydrogenase X mitochondrial OS=Homo sapiens OX=9606 GN=ALDH1B1 PE=1 SV=3	P30837		AL1B1	415.51	370.88	329.23	488.12	557.04	633.35
1271	4124	Q16630|CPSF6_HUMAN	234.22	59210	6	13	Cleavage and polyadenylation specificity factor subunit 6 OS=Homo sapiens OX=9606 GN=CPSF6 PE=1 SV=2	Q16630		CPSF6	591.06	619.27	557.66	501.61	695.47	710.03
1265	3650	Q15631|TSN_HUMAN	204.7	26183	7	35	Translin OS=Homo sapiens OX=9606 GN=TSN PE=1 SV=1	Q15631		TSN	656.36	597.74	550.72	632.36	1184.76	766.45
1567	2580	Q53H12|AGK_HUMAN	246.43	47137	7	27	Acylglycerol kinase mitochondrial OS=Homo sapiens OX=9606 GN=AGK PE=1 SV=2	Q53H12		AGK	527.26	158.99	349.76	357.9	582.76	644.82
1115	1638	Q14145|KEAP1_HUMAN	269.35	69666	13	30	Kelch-like ECH-associated protein 1 OS=Homo sapiens OX=9606 GN=KEAP1 PE=1 SV=2	Q14145		KEAP1	379.54	380.4	258.39	765.64	770.99	768.22
1116	2624	Q9UH99|SUN2_HUMAN	246.99	80311	12	27	SUN domain-containing protein 2 OS=Homo sapiens OX=9606 GN=SUN2 PE=1 SV=3	Q9UH99		SUN2	395.76	236.62	357.63	635.79	623.75	755.76
1601	3479	Q96SQ9-2|CP2S1_HUMAN	251.67	62231	9	26	Isoform 2 of Cytochrome P450 2S1 OS=Homo sapiens OX=9606 GN=CYP2S1	Q96SQ9	2	CP2S1	548.03	523.63	368.86	577.39	637.06	703.56
1013	991	Q6ZN66|GBP6_HUMAN	282.5	72427	16	39	Guanylate-binding protein 6 OS=Homo sapiens OX=9606 GN=GBP6 PE=2 SV=1	Q6ZN66		GBP6	494.12	473	442.13	847.89	822.81	762.56
856	507	Q12955|ANK3_HUMAN	316.43	480416	20	8	Ankyrin-3 OS=Homo sapiens OX=9606 GN=ANK3 PE=1 SV=3	Q12955		ANK3	374.33	133.24	399.77	663.33	429.16	694.23
980	2769	P61011|SRP54_HUMAN	241.35	55705	10	27	Signal recognition particle 54 kDa protein OS=Homo sapiens OX=9606 GN=SRP54 PE=1 SV=1	P61011		SRP54	969.56	1127.3	1088.3	823.51	1241.9	945.75
943	670	O75534|CSDE1_HUMAN	281.02	88885	14	27	Cold shock domain-containing protein E1 OS=Homo sapiens OX=9606 GN=CSDE1 PE=1 SV=2	O75534		CSDE1	431.88	395.56	410.45	971.54	602.54	759.42
1590	2590	P62995|TRA2B_HUMAN	182.2	33666	7	32	Transformer-2 protein homolog beta OS=Homo sapiens OX=9606 GN=TRA2B PE=1 SV=1	P62995		TRA2B	1596.25	1486.3	1609.9	1171.13	1540.8	1050.32
4637	7971	Q66K89|E4F1_HUMAN	86.77	83496	2	4	Transcription factor E4F1 OS=Homo sapiens OX=9606 GN=E4F1 PE=1 SV=2	Q66K89		E4F1	0	0	0	2.84	0	379.19
1158	3591	Q9Y224|RTRAF_HUMAN	257.5	28068	11	50	RNA transcription translation and transport factor protein OS=Homo sapiens OX=9606 GN=RTRAF PE=1 SV=1	Q9Y224		RTRAF	494.35	425.45	332.78	458.69	470.93	619.21
2563	25094	P56134-3|ATPK_HUMAN	96.6	6295	2	44	Isoform 3 of ATP synthase subunit f mitochondrial OS=Homo sapiens OX=9606 GN=ATP5MF	P56134	3	ATPK	321.25	298.69	681.09	859.05	391.91	769.97
232	4812	P84085|ARF5_HUMAN	254.52	20530	3	52	ADP-ribosylation factor 5 OS=Homo sapiens OX=9606 GN=ARF5 PE=1 SV=2	P84085		ARF5	597.65	1268	793.31	1132.9	755.28	758.7
1012	653	P11388|TOP2A_HUMAN	312.88	174384	19	19	DNA topoisomerase 2-alpha OS=Homo sapiens OX=9606 GN=TOP2A PE=1 SV=3	P11388		TOP2A	208.95	137.22	165.65	806.99	802.08	770.42
688	1520	P42166|LAP2A_HUMAN	328.13	75492	8	36	Lamina-associated polypeptide 2 isoform alpha OS=Homo sapiens OX=9606 GN=TMPO PE=1 SV=2	P42166		LAP2A	410.49	537.84	377.29	640.96	575.44	677.03
1346	1473	O60524-4|NEMF_HUMAN	224.08	118025	9	12	Isoform 4 of Nuclear export mediator factor NEMF OS=Homo sapiens OX=9606 GN=NEMF	O60524	4	NEMF	470.87	385.88	487.72	521.1	363.78	627.46
1671	3313	P49189-3|AL9A1_HUMAN	205.35	56292	6	18	Isoform 3 of 4-trimethylaminobutyraldehyde dehydrogenase OS=Homo sapiens OX=9606 GN=ALDH9A1	P49189	3	AL9A1	629.55	559.45	579.78	680.57	656.63	734.26
1668	1765	Q8WU90|ZC3HF_HUMAN	232.88	48603	11	28	Zinc finger CCCH domain-containing protein 15 OS=Homo sapiens OX=9606 GN=ZC3H15 PE=1 SV=1	Q8WU90		ZC3HF	431.71	254.55	255.31	420.38	767.64	646.93
1214	873	Q7L014|DDX46_HUMAN	244.4	117362	16	24	Probable ATP-dependent RNA helicase DDX46 OS=Homo sapiens OX=9606 GN=DDX46 PE=1 SV=2	Q7L014		DDX46	432.77	253.5	283.98	458.94	529.82	629.36
1897	6159	Q92979|NEP1_HUMAN	162.87	26720	4	27	Ribosomal RNA small subunit methyltransferase NEP1 OS=Homo sapiens OX=9606 GN=EMG1 PE=1 SV=4	Q92979		NEP1	735.59	662.76	552.33	707.56	453.05	720.64
1168	1773	Q9UHR4|BI2L1_HUMAN	285.66	56883	11	27	Brain-specific angiogenesis inhibitor 1-associated protein 2-like protein 1 OS=Homo sapiens OX=9606 GN=BAIAP2L1 PE=1 SV=2	Q9UHR4		BI2L1	644.22	750.18	413.44	820.52	636.84	742.67
702	1140	O14617|AP3D1_HUMAN	292.85	130158	18	19	AP-3 complex subunit delta-1 OS=Homo sapiens OX=9606 GN=AP3D1 PE=1 SV=1	O14617		AP3D1	728.94	557.96	1064.84	996.04	1086.8	902.15
1345	1663	Q9H307|PININ_HUMAN	231.33	81628	13	24	Pinin OS=Homo sapiens OX=9606 GN=PNN PE=1 SV=5	Q9H307		PININ	303.97	284.93	159.38	545.41	332.22	613.9
2765	5536	Q8TF05-2|PP4R1_HUMAN	161.73	105195	4	8	Isoform 2 of Serine/threonine-protein phosphatase 4 regulatory subunit 1 OS=Homo sapiens OX=9606 GN=PPP4R1	Q8TF05	2	PP4R1	0	0	259.98	438.79	44.83	442.07
1852	4457	P51571|SSRD_HUMAN	183.19	18999	6	46	Translocon-associated protein subunit delta OS=Homo sapiens OX=9606 GN=SSR4 PE=1 SV=1	P51571		SSRD	828.6	592.75	642.84	770.57	794.37	739.61
1006	1229	Q68E01-2|INT3_HUMAN	281.67	118013	15	26	Isoform 2 of Integrator complex subunit 3 OS=Homo sapiens OX=9606 GN=INTS3	Q68E01	2	INT3	414.55	399.05	366.02	521.03	546.99	660.39
1067	4510	Q16836|HCDH_HUMAN	253.28	34294	5	32	Hydroxyacyl-coenzyme A dehydrogenase mitochondrial OS=Homo sapiens OX=9606 GN=HADH PE=1 SV=3	Q16836		HCDH	973.79	486.22	817.13	874.64	1180.9	943.88
835	791	P51532|SMCA4_HUMAN	274.57	184644	7	12	Transcription activator BRG1 OS=Homo sapiens OX=9606 GN=SMARCA4 PE=1 SV=2	P51532		SMCA4	501.53	639.42	597.58	806.48	724.76	755.05
1002	1410	P52735-3|VAV2_HUMAN	265.93	97032	13	23	Isoform 3 of Guanine nucleotide exchange factor VAV2 OS=Homo sapiens OX=9606 GN=VAV2	P52735	3	VAV2	461.67	284.37	461.65	481.49	509.22	628.08
1435	2228	Q9Y4E8-3|UBP15_HUMAN	242.62	109796	12	20	Isoform 3 of Ubiquitin carboxyl-terminal hydrolase 15 OS=Homo sapiens OX=9606 GN=USP15	Q9Y4E8	3	UBP15	569.09	208.32	511.69	507.07	666.3	689.76
1605	1252	P14735|IDE_HUMAN	242.5	117968	12	19	Insulin-degrading enzyme OS=Homo sapiens OX=9606 GN=IDE PE=1 SV=4	P14735		IDE	359.76	0	578.02	717.69	615.12	727.31
1600	5016	Q9BVG4|PBDC1_HUMAN	190.05	26057	6	29	Protein PBDC1 OS=Homo sapiens OX=9606 GN=PBDC1 PE=1 SV=1	Q9BVG4		PBDC1	478.58	393.95	515.96	740.72	579.31	734.72
1229	4364	Q9Y277-2|VDAC3_HUMAN	186.13	30790	3	20	Isoform 2 of Voltage-dependent anion-selective channel protein 3 OS=Homo sapiens OX=9606 GN=VDAC3	Q9Y277	2	VDAC3	396.75	585.19	457.62	622.4	583.49	733.9
1684	3446	Q08209-2|PP2BA_HUMAN	185.08	57659	6	19	Isoform 2 of Serine/threonine-protein phosphatase 2B catalytic subunit alpha isoform OS=Homo sapiens OX=9606 GN=PPP3CA	Q08209	2	PP2BA	394.58	635.84	616.19	497	477.1	633.7
2000	5157	P46734|MP2K3_HUMAN	142.25	39318	3	12	Dual specificity mitogen-activated protein kinase kinase 3 OS=Homo sapiens OX=9606 GN=MAP2K3 PE=1 SV=2	P46734		MP2K3	285.84	451.74	271.66	670.18	527.17	732.19
2299	11020	Q9UHY7|ENOPH_HUMAN	112.69	28933	1	8	Enolase-phosphatase E1 OS=Homo sapiens OX=9606 GN=ENOPH1 PE=1 SV=1	Q9UHY7		ENOPH	315.8	628.81	573.22	641.94	464	691.07
2300	7079	Q15369|ELOC_HUMAN	190.86	12473	4	42	Elongin-C OS=Homo sapiens OX=9606 GN=ELOC PE=1 SV=1	Q15369		ELOC	293.46	522.64	636.6	417.93	370.11	727.04
777	846	Q9P265|DIP2B_HUMAN	305.38	171491	16	16	Disco-interacting protein 2 homolog B OS=Homo sapiens OX=9606 GN=DIP2B PE=1 SV=3	Q9P265		DIP2B	491.24	450.91	529.12	614.29	505.39	655.06
1415	2713	Q9P2B2|FPRP_HUMAN	244.67	98556	9	13	Prostaglandin F2 receptor negative regulator OS=Homo sapiens OX=9606 GN=PTGFRN PE=1 SV=2	Q9P2B2		FPRP	402.11	520.18	363.91	817.08	718.58	741.15
1949	4781	O00422-2|SAP18_HUMAN	173.13	19526	4	37	Isoform 2 of Histone deacetylase complex subunit SAP18 OS=Homo sapiens OX=9606 GN=SAP18	O00422	2	SAP18	601.3	609.58	611.66	714.25	746.94	723.15
1270	3455	Q08257|QOR_HUMAN	259.17	35207	8	40	Quinone oxidoreductase OS=Homo sapiens OX=9606 GN=CRYZ PE=1 SV=1	Q08257		QOR	711.88	505.67	557.6	745.08	658.09	722.74
1449	651	P26358|DNMT1_HUMAN	264.57	183164	15	14	DNA (cytosine-5)-methyltransferase 1 OS=Homo sapiens OX=9606 GN=DNMT1 PE=1 SV=2	P26358		DNMT1	220.79	123.59	225.7	611.96	494.89	664.49
1491	3475	P56545-2|CTBP2_HUMAN	219.33	106187	5	11	Isoform 2 of C-terminal-binding protein 2 OS=Homo sapiens OX=9606 GN=CTBP2	P56545	2	CTBP2	579.94	793.12	638.82	979.13	706.82	780.85
1539	16075	P04080|CYTB_HUMAN	148.42	11140	2	34	Cystatin-B OS=Homo sapiens OX=9606 GN=CSTB PE=1 SV=2	P04080		CYTB	1201.45	1317.5	1133.25	516.03	572.54	710.15
869	1128	P26640|SYVC_HUMAN	294.89	140476	15	18	Valine--tRNA ligase OS=Homo sapiens OX=9606 GN=VARS1 PE=1 SV=4	P26640		SYVC	808.64	878.19	934.84	837.28	799.4	736.5
999	2051	Q5TFE4|NT5D1_HUMAN	278.35	51845	14	44	5'-nucleotidase domain-containing protein 1 OS=Homo sapiens OX=9606 GN=NT5DC1 PE=1 SV=1	Q5TFE4		NT5D1	875.18	728.63	524.55	293.63	730.37	690.34
619	1441	O94973-2|AP2A2_HUMAN	309.89	104090	10	24	Isoform 2 of AP-2 complex subunit alpha-2 OS=Homo sapiens OX=9606 GN=AP2A2	O94973	2	AP2A2	581.59	647.54	491.87	637.84	610.77	686.97
2143	9015	P55036|PSMD4_HUMAN	184.16	40737	3	15	26S proteasome non-ATPase regulatory subunit 4 OS=Homo sapiens OX=9606 GN=PSMD4 PE=1 SV=1	P55036		PSMD4	578.84	555.09	447.62	706.42	687.99	710.82
407	243	P27816-6|MAP4_HUMAN	346.49	119958	23	32	Isoform 6 of Microtubule-associated protein 4 OS=Homo sapiens OX=9606 GN=MAP4	P27816	6	MAP4	1501.7	1029.96	1486.2	1133.29	1309.2	955.99
1244	4066	P38117-2|ETFB_HUMAN	207.77	37435	5	18	Isoform 2 of Electron transfer flavoprotein subunit beta OS=Homo sapiens OX=9606 GN=ETFB	P38117	2	ETFB	623.18	425.4	457.4	397.45	932.51	713.11
983	2272	P43405-2|KSYK_HUMAN	243.26	69510	9	20	Isoform Short of Tyrosine-protein kinase SYK OS=Homo sapiens OX=9606 GN=SYK	P43405	2	KSYK	521.48	606.95	531.97	875.77	666.56	746.5
707	709	O95757|HS74L_HUMAN	302.78	94512	15	30	Heat shock 70 kDa protein 4L OS=Homo sapiens OX=9606 GN=HSPA4L PE=1 SV=3	O95757		HS74L	524.34	469.83	440.13	519.86	379.13	614.75
877	1326	Q9NUQ6|SPS2L_HUMAN	276.38	61729	12	34	SPATS2-like protein OS=Homo sapiens OX=9606 GN=SPATS2L PE=1 SV=2	Q9NUQ6		SPS2L	506.83	488.35	395.58	528.3	642.14	625.65
1163	3904	P07858|CATB_HUMAN	229.23	37822	6	26	Cathepsin B OS=Homo sapiens OX=9606 GN=CTSB PE=1 SV=3	P07858		CATB	762.8	695.55	885	1237.9	1132.9	939.48
1442	1708	Q96SU4-2|OSBL9_HUMAN	231.61	81787	10	18	Isoform 2 of Oxysterol-binding protein-related protein 9 OS=Homo sapiens OX=9606 GN=OSBPL9	Q96SU4	2	OSBL9	378.98	584.23	635.2	720.34	521.48	692.39
1107	3584	P16152|CBR1_HUMAN	240.63	30375	7	52	Carbonyl reductase [NADPH] 1 OS=Homo sapiens OX=9606 GN=CBR1 PE=1 SV=3	P16152		CBR1	532.72	405.37	400.89	663.06	679.46	708.31
1145	2491	Q9BZK7|TBL1R_HUMAN	276.29	55595	10	30	F-box-like/WD repeat-containing protein TBL1XR1 OS=Homo sapiens OX=9606 GN=TBL1XR1 PE=1 SV=1	Q9BZK7		TBL1R	580.47	542.4	570.89	722.99	708.89	707.96
606	737	O95782-2|AP2A1_HUMAN	330.61	105361	17	31	Isoform B of AP-2 complex subunit alpha-1 OS=Homo sapiens OX=9606 GN=AP2A1	O95782	2	AP2A1	578.78	673.3	737.26	509.54	609.64	660.59
636	1861	Q96KP4|CNDP2_HUMAN	323.38	52879	15	46	Cytosolic non-specific dipeptidase OS=Homo sapiens OX=9606 GN=CNDP2 PE=1 SV=2	Q96KP4		CNDP2	805.94	736.42	660.64	863.53	890.62	780.6
1213	1175	Q9UDY2-3|ZO2_HUMAN	252.52	131368	13	17	Isoform C1 of Tight junction protein ZO-2 OS=Homo sapiens OX=9606 GN=TJP2	Q9UDY2	3	ZO2	266.6	217.99	271.03	458.53	523.66	627.24
1635	3073	Q15428|SF3A2_HUMAN	202.12	49256	6	20	Splicing factor 3A subunit 2 OS=Homo sapiens OX=9606 GN=SF3A2 PE=1 SV=2	Q15428		SF3A2	592	585.68	662.52	609.49	399.56	652.92
1056	2606	P49748|ACADV_HUMAN	281.27	70390	10	22	Very long-chain specific acyl-CoA dehydrogenase mitochondrial OS=Homo sapiens OX=9606 GN=ACADVL PE=1 SV=1	P49748		ACADV	565.88	400.99	563.41	788.08	776.39	710.78
1743	5967	P06865|HEXA_HUMAN	210.1	60703	6	18	Beta-hexosaminidase subunit alpha OS=Homo sapiens OX=9606 GN=HEXA PE=1 SV=2	P06865		HEXA	195.98	368	223.88	588.46	514.58	633.64
1549	3676	P23193-2|TCEA1_HUMAN	214.85	31664	6	25	Isoform 2 of Transcription elongation factor A protein 1 OS=Homo sapiens OX=9606 GN=TCEA1	P23193	2	TCEA1	675.64	523.03	1056.96	686.53	505.84	644.11
913	1831	O14896|IRF6_HUMAN	260.3	53130	13	38	Interferon regulatory factor 6 OS=Homo sapiens OX=9606 GN=IRF6 PE=1 SV=1	O14896		IRF6	1819.7	3639.2	1121.09	1395.2	1539.1	1002.57
996	901	Q8IUD2|RB6I2_HUMAN	268.67	128086	13	18	ELKS/Rab6-interacting/CAST family member 1 OS=Homo sapiens OX=9606 GN=ERC1 PE=1 SV=1	Q8IUD2		RB6I2	466.62	359.53	295.24	410.42	472	591.08
1799	22614	P00403|COX2_HUMAN	159.91	25565	2	16	Cytochrome c oxidase subunit 2 OS=Homo sapiens OX=9606 GN=MT-CO2 PE=1 SV=1	P00403		COX2	393.11	360.62	382.66	629.24	580.81	644.95
1888	3041	P09001|RM03_HUMAN	201.92	38633	6	31	39S ribosomal protein L3 mitochondrial OS=Homo sapiens OX=9606 GN=MRPL3 PE=1 SV=1	P09001		RM03	101.54	0	116.74	625.46	334.54	660.8
2168	5337	Q9BWJ5|SF3B5_HUMAN	188.99	10135	5	84	Splicing factor 3B subunit 5 OS=Homo sapiens OX=9606 GN=SF3B5 PE=1 SV=1	Q9BWJ5		SF3B5	313.72	396.55	311.27	504.36	558.65	612.69
1036	4500	O75340|PDCD6_HUMAN	208.92	21868	7	41	Programmed cell death protein 6 OS=Homo sapiens OX=9606 GN=PDCD6 PE=1 SV=1	O75340		PDCD6	1542.95	1367.4	1477.7	920.51	744.37	767.77
1588	3538	Q9BTT0|AN32E_HUMAN	214.13	30692	7	46	Acidic leucine-rich nuclear phosphoprotein 32 family member E OS=Homo sapiens OX=9606 GN=ANP32E PE=1 SV=1	Q9BTT0		AN32E	399.81	167.93	270.63	625.07	571.81	675.97
664	445	P20020-6|AT2B1_HUMAN	334.63	130617	12	24	Isoform K of Plasma membrane calcium-transporting ATPase 1 OS=Homo sapiens OX=9606 GN=ATP2B1	P20020	6	AT2B1	761.56	686.25	677.59	485.76	754.07	693.89
88	480	P61978-3|HNRPK_HUMAN	368.67	48562	2	52	Isoform 3 of Heterogeneous nuclear ribonucleoprotein K OS=Homo sapiens OX=9606 GN=HNRNPK	P61978	3	HNRPK	595.81	722.23	662.38	707.82	725.85	702.16
896	1223	P04040|CATA_HUMAN	303.36	59756	15	45	Catalase OS=Homo sapiens OX=9606 GN=CAT PE=1 SV=3	P04040		CATA	390.48	254.82	573.85	848.77	1115.65	875.19
1697	4957	P47813|IF1AX_HUMAN	163.19	16460	4	37	Eukaryotic translation initiation factor 1A X-chromosomal OS=Homo sapiens OX=9606 GN=EIF1AX PE=1 SV=2	P47813		IF1AX	963.73	1078.4	889.8	579.43	623.33	637.46
1686	3603	Q49A26-3|GLYR1_HUMAN	223.59	59828	8	21	Isoform 3 of Putative oxidoreductase GLYR1 OS=Homo sapiens OX=9606 GN=GLYR1	Q49A26	3	GLYR1	361.77	321.75	353.14	581.46	439.69	621.2
1511	4138	Q9NVS9|PNPO_HUMAN	227.67	29988	7	33	Pyridoxine-5'-phosphate oxidase OS=Homo sapiens OX=9606 GN=PNPO PE=1 SV=1	Q9NVS9		PNPO	478.17	447.29	432.11	480.91	603.09	636.1
1076	4076	Q13162|PRDX4_HUMAN	235.66	30540	5	35	Peroxiredoxin-4 OS=Homo sapiens OX=9606 GN=PRDX4 PE=1 SV=1	Q13162		PRDX4	481.9	449.08	543.64	736.31	709.76	706.35
1557	1621	Q8N3F8|MILK1_HUMAN	221.24	93441	8	15	MICAL-like protein 1 OS=Homo sapiens OX=9606 GN=MICALL1 PE=1 SV=2	Q8N3F8		MILK1	417.54	468.48	217.93	584.65	566.51	631.17
1026	892	O43847|NRDC_HUMAN	285.83	131700	16	18	Nardilysin OS=Homo sapiens OX=9606 GN=NRDC PE=1 SV=3	O43847		NRDC	525.8	569.46	761.71	942.16	1014.84	826.09
4857	7942	O95045-2|UPP2_HUMAN	52.01	41602	1	7	Isoform 2 of Uridine phosphorylase 2 OS=Homo sapiens OX=9606 GN=UPP2	O95045	2	UPP2	0	0	0	0	0	340.78
1705	3470	Q9UHY1|NRBP_HUMAN	209.85	59845	6	19	Nuclear receptor-binding protein OS=Homo sapiens OX=9606 GN=NRBP1 PE=1 SV=1	Q9UHY1		NRBP	557.17	531.63	346.37	531.78	594.69	652.14
1054	1056	Q99459|CDC5L_HUMAN	274.78	92251	17	32	Cell division cycle 5-like protein OS=Homo sapiens OX=9606 GN=CDC5L PE=1 SV=2	Q99459		CDC5L	630.96	795.27	421.81	955.36	909.71	788.4
1317	3209	Q9BRX8-2|PXL2A_HUMAN	222.18	24463	10	41	Isoform 2 of Peroxiredoxin-like 2A OS=Homo sapiens OX=9606 GN=PRXL2A	Q9BRX8	2	PXL2A	436.88	413.21	154.45	512.49	603.35	642.85
626	2149	Q15366-2|PCBP2_HUMAN	287.01	38651	11	64	Isoform 2 of Poly(rC)-binding protein 2 OS=Homo sapiens OX=9606 GN=PCBP2	Q15366	2	PCBP2	1523.92	1291.8	707.99	1451.95	1526.8	1027.25
1100	2581	O15355|PPM1G_HUMAN	229.49	59272	7	25	Protein phosphatase 1G OS=Homo sapiens OX=9606 GN=PPM1G PE=1 SV=1	O15355		PPM1G	519.77	453.34	408.53	616.57	698.26	683
1279	2255	P33527-4|MRP1_HUMAN	228.3	164303	11	14	Isoform 4 of Multidrug resistance-associated protein 1 OS=Homo sapiens OX=9606 GN=ABCC1	P33527	4	MRP1	481.59	235.97	463.77	607.68	374.23	639.13
1712	3945	P46109|CRKL_HUMAN	198.62	33777	7	27	Crk-like protein OS=Homo sapiens OX=9606 GN=CRKL PE=1 SV=1	P46109		CRKL	523.82	238.41	543.91	571.44	613.64	627.31
1975	4507	O75937|DNJC8_HUMAN	203.83	29842	6	30	DnaJ homolog subfamily C member 8 OS=Homo sapiens OX=9606 GN=DNAJC8 PE=1 SV=2	O75937		DNJC8	357.93	141.56	154.53	460.28	428.39	586.62
1108	1394	Q13740-2|CD166_HUMAN	271.67	63665	16	29	Isoform 2 of CD166 antigen OS=Homo sapiens OX=9606 GN=ALCAM	Q13740	2	CD166	512.59	434.61	164.43	1223.65	1045.25	843.03
814	2292	Q9H2U2|IPYR2_HUMAN	273.12	37920	12	48	Inorganic pyrophosphatase 2 mitochondrial OS=Homo sapiens OX=9606 GN=PPA2 PE=1 SV=2	Q9H2U2		IPYR2	734.98	769.77	608.13	819.72	1032.39	820.1
888	1338	Q96T76-8|MMS19_HUMAN	284.23	115705	12	20	Isoform 5 of MMS19 nucleotide excision repair protein homolog OS=Homo sapiens OX=9606 GN=MMS19	Q96T76	8	MMS19	542.56	483.46	546.06	672.66	650.91	672.08
1232	692	Q92614|MY18A_HUMAN	279.5	233113	18	14	Unconventional myosin-XVIIIa OS=Homo sapiens OX=9606 GN=MYO18A PE=1 SV=3	Q92614		MY18A	630.87	547.09	447.08	668.19	607.1	648.64
2452	5974	P12830-2|CADH1_HUMAN	145.56	90942	2	5	Isoform 2 of Cadherin-1 OS=Homo sapiens OX=9606 GN=CDH1	P12830	2	CADH1	1072.65	1032.8	505.65	921.35	962.43	814.16
2401	6287	Q86WB0|NIPA_HUMAN	117.7	55262	2	7	Nuclear-interacting partner of ALK OS=Homo sapiens OX=9606 GN=ZC3HC1 PE=1 SV=1	Q86WB0		NIPA	337.42	264.82	295.47	576.68	524.7	627.07
879	1306	O14672|ADA10_HUMAN	275.59	84142	10	23	Disintegrin and metalloproteinase domain-containing protein 10 OS=Homo sapiens OX=9606 GN=ADAM10 PE=1 SV=1	O14672		ADA10	310.91	276.65	263.06	754.92	652.51	666.27
1476	3065	Q53EL6-2|PDCD4_HUMAN	254.35	50576	7	26	Isoform 2 of Programmed cell death protein 4 OS=Homo sapiens OX=9606 GN=PDCD4	Q53EL6	2	PDCD4	170.81	106.29	105.46	584.04	657.05	666.03
676	2217	P60891|PRPS1_HUMAN	278.31	34834	3	42	Ribose-phosphate pyrophosphokinase 1 OS=Homo sapiens OX=9606 GN=PRPS1 PE=1 SV=2	P60891		PRPS1	544.02	453.98	560.67	622.06	595.96	649.38
288	2259	P31150|GDIA_HUMAN	360.35	50583	9	41	Rab GDP dissociation inhibitor alpha OS=Homo sapiens OX=9606 GN=GDI1 PE=1 SV=2	P31150		GDIA	756.36	566.24	526.41	619.2	752.71	691.39
2528	5820	P30679|GNA15_HUMAN	140.43	43568	3	12	Guanine nucleotide-binding protein subunit alpha-15 OS=Homo sapiens OX=9606 GN=GNA15 PE=1 SV=2	P30679		GNA15	76.72	46.77	108.4	155.96	29.56	402.53
883	576	Q6R327-3|RICTR_HUMAN	270.7	195010	16	14	Isoform 3 of Rapamycin-insensitive companion of mTOR OS=Homo sapiens OX=9606 GN=RICTOR	Q6R327	3	RICTR	413.8	283.15	378.6	786.28	412.69	662.84
1060	3809	Q9UKY7|CDV3_HUMAN	227.96	27335	5	48	Protein CDV3 homolog OS=Homo sapiens OX=9606 GN=CDV3 PE=1 SV=1	Q9UKY7		CDV3	550.8	783.3	841.72	708.93	664.46	685.09
945	3815	Q13907|IDI1_HUMAN	233.28	26319	9	58	Isopentenyl-diphosphate Delta-isomerase 1 OS=Homo sapiens OX=9606 GN=IDI1 PE=1 SV=2	Q13907		IDI1	429.93	693.61	493.48	1065.15	766.79	719.5
1878	2432	Q13523|PRP4B_HUMAN	220.36	116987	9	10	Serine/threonine-protein kinase PRP4 homolog OS=Homo sapiens OX=9606 GN=PRPF4B PE=1 SV=3	Q13523		PRP4B	222.38	107.24	340	442.18	265.65	545.18
1261	7898	Q01844-6|EWS_HUMAN	200.9	62508	5	6	Isoform 6 of RNA-binding protein EWS OS=Homo sapiens OX=9606 GN=EWSR1	Q01844	6	EWS	657.43	619.82	649.49	602.9	378.03	647.47
1298	6238	Q9Y333|LSM2_HUMAN	198.15	10835	4	73	U6 snRNA-associated Sm-like protein LSm2 OS=Homo sapiens OX=9606 GN=LSM2 PE=1 SV=1	Q9Y333		LSM2	367.95	248.81	455.18	326.95	513.98	584.02
1305	1452	Q9UIW2|PLXA1_HUMAN	219.11	211066	10	8	Plexin-A1 OS=Homo sapiens OX=9606 GN=PLXNA1 PE=1 SV=3	Q9UIW2		PLXA1	347.97	308.46	376.15	590.2	485.56	634.51
876	1805	O95831|AIFM1_HUMAN	282.35	66901	12	25	Apoptosis-inducing factor 1 mitochondrial OS=Homo sapiens OX=9606 GN=AIFM1 PE=1 SV=1	O95831		AIFM1	488.49	347.58	295.66	751.04	1163.71	706.48
902	1209	Q6P2E9|EDC4_HUMAN	279.22	151661	12	17	Enhancer of mRNA-decapping protein 4 OS=Homo sapiens OX=9606 GN=EDC4 PE=1 SV=1	Q6P2E9		EDC4	631.32	396.8	511.88	633.07	670.38	654.32
1815	4126	P82979|SARNP_HUMAN	173.69	23671	5	30	SAP domain-containing ribonucleoprotein OS=Homo sapiens OX=9606 GN=SARNP PE=1 SV=3	P82979		SARNP	687.53	538.34	642.79	550.71	572.32	603.08
824	1368	P01130-4|LDLR_HUMAN	300.48	90940	11	23	Isoform 4 of Low-density lipoprotein receptor OS=Homo sapiens OX=9606 GN=LDLR	P01130	4	LDLR	1240.55	1189.25	1403.05	729.59	572.49	650.68
987	1030	Q9UBF2|COPG2_HUMAN	313.18	97622	17	35	Coatomer subunit gamma-2 OS=Homo sapiens OX=9606 GN=COPG2 PE=1 SV=1	Q9UBF2		COPG2	537.03	696.82	587.86	690.48	496.18	648.36
1630	5094	Q16527|CSRP2_HUMAN	189.37	20954	5	36	Cysteine and glycine-rich protein 2 OS=Homo sapiens OX=9606 GN=CSRP2 PE=1 SV=3	Q16527		CSRP2	792.19	898.43	757	669.37	282.15	641.99
976	2163	P48506|GSH1_HUMAN	229.7	72766	9	19	Glutamate--cysteine ligase catalytic subunit OS=Homo sapiens OX=9606 GN=GCLC PE=1 SV=2	P48506		GSH1	1199.85	684.83	822.89	1238.95	862.25	788.87
1172	2393	Q6IBS0|TWF2_HUMAN	243.23	39548	7	37	Twinfilin-2 OS=Homo sapiens OX=9606 GN=TWF2 PE=1 SV=2	Q6IBS0		TWF2	400.74	528.35	540.01	575.04	563.42	645.78
1698	4574	O75663|TIPRL_HUMAN	215.47	31444	6	37	TIP41-like protein OS=Homo sapiens OX=9606 GN=TIPRL PE=1 SV=2	O75663		TIPRL	352.32	523.99	389.37	566.43	453.41	581.56
2580	10409	Q10472|GALT1_HUMAN	131.48	64219	2	9	Polypeptide N-acetylgalactosaminyltransferase 1 OS=Homo sapiens OX=9606 GN=GALNT1 PE=1 SV=1	Q10472		GALT1	246.07	384.52	535.42	568.12	595.71	606.09
648	1562	P19784|CSK22_HUMAN	292.69	41213	15	54	Casein kinase II subunit alpha' OS=Homo sapiens OX=9606 GN=CSNK2A2 PE=1 SV=1	P19784		CSK22	906.46	565.3	502.69	708.92	851.45	677.53
1784	5719	P68402|PA1B2_HUMAN	210.09	25569	5	39	Platelet-activating factor acetylhydrolase IB subunit beta OS=Homo sapiens OX=9606 GN=PAFAH1B2 PE=1 SV=1	P68402		PA1B2	323.16	166.41	138.19	479.71	348.48	557.51
1772	9385	O75348|VATG1_HUMAN	148.9	13758	2	34	V-type proton ATPase subunit G 1 OS=Homo sapiens OX=9606 GN=ATP6V1G1 PE=1 SV=3	O75348		VATG1	486.39	501.93	692.4	681.86	633.93	640.63
1199	2490	P17480-2|UBF1_HUMAN	222.83	84937	8	14	Isoform UBF2 of Nucleolar transcription factor 1 OS=Homo sapiens OX=9606 GN=UBTF	P17480	2	UBF1	408.65	325.89	455.4	703.49	714.18	656.39
970	503	P35573|GDE_HUMAN	306.51	174763	21	24	Glycogen debranching enzyme OS=Homo sapiens OX=9606 GN=AGL PE=1 SV=3	P35573		GDE	224.51	185.24	180.28	444.89	352.76	572.64
1198	659	O75165|DJC13_HUMAN	269.05	254412	18	12	DnaJ homolog subfamily C member 13 OS=Homo sapiens OX=9606 GN=DNAJC13 PE=1 SV=5	O75165		DJC13	323.5	350.45	193.69	504.79	569.02	622.84
643	611	P52948-5|NUP98_HUMAN	343.4	195816	19	18	Isoform 5 of Nuclear pore complex protein Nup98-Nup96 OS=Homo sapiens OX=9606 GN=NUP98	P52948	5	NUP98	520.63	593.92	331.52	765.33	516.72	637.98
2187	5492	Q7L9L4|MOB1B_HUMAN	165.3	25091	5	23	MOB kinase activator 1B OS=Homo sapiens OX=9606 GN=MOB1B PE=1 SV=3	Q7L9L4		MOB1B	214.26	297.69	94.27	585.75	234.16	575.3
922	2037	Q92945|FUBP2_HUMAN	271.98	73115	10	22	Far upstream element-binding protein 2 OS=Homo sapiens OX=9606 GN=KHSRP PE=1 SV=4	Q92945		FUBP2	763.12	829.71	771.17	861.8	558.72	637.62
1535	4765	P07741|APT_HUMAN	219.97	19608	7	56	Adenine phosphoribosyltransferase OS=Homo sapiens OX=9606 GN=APRT PE=1 SV=2	P07741		APT	409.28	334.92	477.34	455.9	629.4	636.9
706	3593	P13693|TCTP_HUMAN	239.74	19595	9	58	Translationally-controlled tumor protein OS=Homo sapiens OX=9606 GN=TPT1 PE=1 SV=1	P13693		TCTP	4156.2	5632.3	4091.1	3153.25	1243.1	960.3
1319	3444	Q05048|CSTF1_HUMAN	223.06	48358	7	24	Cleavage stimulation factor subunit 1 OS=Homo sapiens OX=9606 GN=CSTF1 PE=1 SV=1	Q05048		CSTF1	504.55	300.54	359.8	636.09	460.98	635.28
622	1351	P36507|MP2K2_HUMAN	264.72	44424	9	48	Dual specificity mitogen-activated protein kinase kinase 2 OS=Homo sapiens OX=9606 GN=MAP2K2 PE=1 SV=1	P36507		MP2K2	782.5	612.78	529.58	610	667.2	634.39
212	1269	P42330|AK1C3_HUMAN	349.17	36853	4	72	Aldo-keto reductase family 1 member C3 OS=Homo sapiens OX=9606 GN=AKR1C3 PE=1 SV=4	P42330		AK1C3	19.05	20.91	0	127.06	64.27	381.05
1609	4454	P29466-2|CASP1_HUMAN	232.02	42888	6	27	Isoform Beta of Caspase-1 OS=Homo sapiens OX=9606 GN=CASP1	P29466	2	CASP1	556.63	1078.26	737.23	806.45	939.92	695.73
1502	2260	Q9BVJ6-3|UT14A_HUMAN	202.97	82005	7	13	Isoform 3 of U3 small nucleolar RNA-associated protein 14 homolog A OS=Homo sapiens OX=9606 GN=UTP14A	Q9BVJ6	3	UT14A	1537.04	563.45	747.96	2209.2	2667.15	1565.56
1486	4651	Q99439|CNN2_HUMAN	208.44	33697	5	25	Calponin-2 OS=Homo sapiens OX=9606 GN=CNN2 PE=1 SV=4	Q99439		CNN2	718.23	615.4	562.08	342.08	524.22	537.69
693	630	Q9Y4K1|CRBG1_HUMAN	325.88	188675	17	17	Beta/gamma crystallin domain-containing protein 1 OS=Homo sapiens OX=9606 GN=CRYBG1 PE=1 SV=3	Q9Y4K1		CRBG1	537.58	608.6	735.45	631.91	633.72	631.7
1543	2813	Q96BN8|OTUL_HUMAN	209.92	40263	9	33	Ubiquitin thioesterase otulin OS=Homo sapiens OX=9606 GN=OTULIN PE=1 SV=3	Q96BN8		OTUL	348.38	4182.33	636.77	307.56	397.99	508.1
1704	6140	Q9Y5S9|RBM8A_HUMAN	149.82	19889	4	36	RNA-binding protein 8A OS=Homo sapiens OX=9606 GN=RBM8A PE=1 SV=1	Q9Y5S9		RBM8A	424.08	519.38	617.02	822.02	628.58	657.89
1487	3920	P27144|KAD4_HUMAN	208.91	25268	7	45	Adenylate kinase 4 mitochondrial OS=Homo sapiens OX=9606 GN=AK4 PE=1 SV=1	P27144		KAD4	499.35	548.75	406.92	618.64	606.45	629.77
1823	4807	P06132|DCUP_HUMAN	190.88	40787	6	26	Uroporphyrinogen decarboxylase OS=Homo sapiens OX=9606 GN=UROD PE=1 SV=2	P06132		DCUP	276.05	355.79	393.03	626.83	591.53	621.67
1398	6550	Q9HCY8|S10AE_HUMAN	222.14	11662	5	63	Protein S100-A14 OS=Homo sapiens OX=9606 GN=S100A14 PE=1 SV=1	Q9HCY8		S10AE	439.81	443.86	466.12	899.51	876.55	744.84
1824	6571	P18077|RL35A_HUMAN	133.6	12538	3	28	60S ribosomal protein L35a OS=Homo sapiens OX=9606 GN=RPL35A PE=1 SV=2	P18077		RL35A	1743.95	619.66	817.79	1005.66	351.48	653.09
1448	4719	Q9P015|RM15_HUMAN	210.96	33420	6	20	39S ribosomal protein L15 mitochondrial OS=Homo sapiens OX=9606 GN=MRPL15 PE=1 SV=1	Q9P015		RM15	217.66	125.54	165.07	496.7	332.63	565.14
1049	1819	Q9BTW9|TBCD_HUMAN	285.57	132600	13	18	Tubulin-specific chaperone D OS=Homo sapiens OX=9606 GN=TBCD PE=1 SV=2	Q9BTW9		TBCD	450.95	360.6	366.85	514.2	502.86	569.72
1673	2401	Q9Y5A9-2|YTHD2_HUMAN	196.19	56877	7	19	Isoform 2 of YTH domain-containing family protein 2 OS=Homo sapiens OX=9606 GN=YTHDF2	Q9Y5A9	2	YTHD2	653.87	401.57	482.56	671.36	607.29	645.16
1718	5709	Q13190|STX5_HUMAN	207.68	39673	4	18	Syntaxin-5 OS=Homo sapiens OX=9606 GN=STX5 PE=1 SV=2	Q13190		STX5	428.33	526.34	468.02	288.34	279.46	487.26
1592	3923	P09525|ANXA4_HUMAN	191.23	35883	5	21	Annexin A4 OS=Homo sapiens OX=9606 GN=ANXA4 PE=1 SV=4	P09525		ANXA4	1377.35	960.86	1323.25	512.54	332.02	540.29
1396	2559	O95487-2|SC24B_HUMAN	226.17	133629	10	11	Isoform 2 of Protein transport protein Sec24B OS=Homo sapiens OX=9606 GN=SEC24B	O95487	2	SC24B	281.75	207.51	237.15	249.48	483.51	520.39
940	1519	Q9Y5K6|CD2AP_HUMAN	260.8	71451	14	35	CD2-associated protein OS=Homo sapiens OX=9606 GN=CD2AP PE=1 SV=1	Q9Y5K6		CD2AP	602.37	987.01	831.9	1131.4	770.42	733.83
640	383	Q93008|USP9X_HUMAN	340.73	292278	29	17	Probable ubiquitin carboxyl-terminal hydrolase FAF-X OS=Homo sapiens OX=9606 GN=USP9X PE=1 SV=3	Q93008		USP9X	685.94	428.48	542.72	659.02	579.72	626.44
1323	3318	Q8IY67-2|RAVR1_HUMAN	271.4	77860	11	31	Isoform 2 of Ribonucleoprotein PTB-binding 1 OS=Homo sapiens OX=9606 GN=RAVER1	Q8IY67	2	RAVR1	428.63	378.93	321.15	458.16	446.09	565.07
956	3016	Q9BXS5|AP1M1_HUMAN	276.86	48587	10	31	AP-1 complex subunit mu-1 OS=Homo sapiens OX=9606 GN=AP1M1 PE=1 SV=3	Q9BXS5		AP1M1	855.88	1099.51	991.98	866.54	829.58	744.61
724	1328	Q9BY44-3|EIF2A_HUMAN	262.01	62289	11	32	Isoform 3 of Eukaryotic translation initiation factor 2A OS=Homo sapiens OX=9606 GN=EIF2A	Q9BY44	3	EIF2A	704.5	741.36	603.77	598.06	602.58	623.58
1182	796	Q15424|SAFB1_HUMAN	293.29	102642	8	23	Scaffold attachment factor B1 OS=Homo sapiens OX=9606 GN=SAFB PE=1 SV=4	Q15424		SAFB1	363.62	367.14	342.4	431.62	242.9	510.06
2083	4641	Q96S52|PIGS_HUMAN	212.63	61656	6	21	GPI transamidase component PIG-S OS=Homo sapiens OX=9606 GN=PIGS PE=1 SV=3	Q96S52		PIGS	360.35	359.04	384.15	478.2	584.41	603.23
1806	2236	Q9UKV8|AGO2_HUMAN	214.03	97208	7	14	Protein argonaute-2 OS=Homo sapiens OX=9606 GN=AGO2 PE=1 SV=3	Q9UKV8		AGO2	108.79	129.04	347.95	326.61	602.86	605.48
1068	3269	O43684-2|BUB3_HUMAN	263.15	36955	8	42	Isoform 2 of Mitotic checkpoint protein BUB3 OS=Homo sapiens OX=9606 GN=BUB3	O43684	2	BUB3	657.49	631.92	637.23	804.57	528.72	620.2
1670	3693	O75494-2|SRS10_HUMAN	208.84	31213	10	29	Isoform 2 of Serine/arginine-rich splicing factor 10 OS=Homo sapiens OX=9606 GN=SRSF10	O75494	2	SRS10	488.55	548.19	394.44	632.2	560.99	613.17
780	270	Q08378-2|GOGA3_HUMAN	301.43	155682	19	20	Isoform 2 of Golgin subfamily A member 3 OS=Homo sapiens OX=9606 GN=GOLGA3	Q08378	2	GOGA3	882.25	1715.2	1246.85	434.18	670.15	530.62
1307	2369	Q9UG63-2|ABCF2_HUMAN	215.45	72444	9	17	Isoform 2 of ATP-binding cassette sub-family F member 2 OS=Homo sapiens OX=9606 GN=ABCF2	Q9UG63	2	ABCF2	552.54	437.63	535.59	733.08	692.45	618.81
1070	2137	Q9UNH7|SNX6_HUMAN	264.08	46649	12	39	Sorting nexin-6 OS=Homo sapiens OX=9606 GN=SNX6 PE=1 SV=1	Q9UNH7		SNX6	482.33	556.62	560.7	604.49	524.32	591.47
1297	5196	P05114|HMGN1_HUMAN	200.69	10659	6	52	Non-histone chromosomal protein HMG-14 OS=Homo sapiens OX=9606 GN=HMGN1 PE=1 SV=3	P05114		HMGN1	2408.15	1964.9	2912.7	528.73	237.66	546.94
1268	2199	Q14694-2|UBP10_HUMAN	232.04	92597	7	15	Isoform 2 of Ubiquitin carboxyl-terminal hydrolase 10 OS=Homo sapiens OX=9606 GN=USP10	Q14694	2	UBP10	363.36	255.83	405.22	490.54	595.43	618.01
965	4061	Q9HAV7|GRPE1_HUMAN	254.1	24279	10	48	GrpE protein homolog 1 mitochondrial OS=Homo sapiens OX=9606 GN=GRPEL1 PE=1 SV=2	Q9HAV7		GRPE1	461.49	491.88	511.89	684.19	657.41	628.99
2212	5970	P51970|NDUA8_HUMAN	175.83	20105	3	27	NADH dehydrogenase [ubiquinone] 1 alpha subcomplex subunit 8 OS=Homo sapiens OX=9606 GN=NDUFA8 PE=1 SV=3	P51970		NDUA8	339.7	270.76	299.42	543.3	551.88	582.44
2628	6791	O15498|YKT6_HUMAN	132.8	22418	3	22	Synaptobrevin homolog YKT6 OS=Homo sapiens OX=9606 GN=YKT6 PE=1 SV=1	O15498		YKT6	628.4	610.09	632.6	626.93	621.81	618.19
2514	6691	O14880|MGST3_HUMAN	147.63	16516	3	34	Microsomal glutathione S-transferase 3 OS=Homo sapiens OX=9606 GN=MGST3 PE=1 SV=1	O14880		MGST3	314.2	298.81	300.51	374.65	472.54	502.03
1445	3657	O75844|FACE1_HUMAN	223.72	54813	7	18	CAAX prenyl protease 1 homolog OS=Homo sapiens OX=9606 GN=ZMPSTE24 PE=1 SV=2	O75844		FACE1	449.6	448.61	551.7	627.58	553.23	607.09
1367	1450	O94906-2|PRP6_HUMAN	250.32	102429	13	19	Isoform 2 of Pre-mRNA-processing factor 6 OS=Homo sapiens OX=9606 GN=PRPF6	O94906	2	PRP6	407.51	387.7	1148.1	522.31	599.08	594.92
1533	4361	P13073|COX41_HUMAN	219.2	19577	7	31	Cytochrome c oxidase subunit 4 isoform 1 mitochondrial OS=Homo sapiens OX=9606 GN=COX4I1 PE=1 SV=1	P13073		COX41	333.82	182.48	306.25	493.36	430.25	536.5
967	1406	P42167|LAP2B_HUMAN	287.33	50670	6	46	Lamina-associated polypeptide 2 isoforms beta/gamma OS=Homo sapiens OX=9606 GN=TMPO PE=1 SV=2	P42167		LAP2B	140.21	432.19	442.59	485.06	370.46	601.68
929	1360	Q8IWX8|CHERP_HUMAN	270.63	103702	11	20	Calcium homeostasis endoplasmic reticulum protein OS=Homo sapiens OX=9606 GN=CHERP PE=1 SV=3	Q8IWX8		CHERP	468.8	452.62	305.38	618.75	547.77	609.2
2360	24788	P84090|ERH_HUMAN	123.57	12259	2	22	Enhancer of rudimentary homolog OS=Homo sapiens OX=9606 GN=ERH PE=1 SV=1	P84090		ERH	137.08	200.75	210.19	298.25	570.68	590.6
1267	1977	Q9UH65|SWP70_HUMAN	252.98	68998	11	31	Switch-associated protein 70 OS=Homo sapiens OX=9606 GN=SWAP70 PE=1 SV=1	Q9UH65		SWP70	534.7	601.76	503.72	608.22	691.53	607.18
1098	1152	Q96KR1|ZFR_HUMAN	278.59	117012	15	17	Zinc finger RNA-binding protein OS=Homo sapiens OX=9606 GN=ZFR PE=1 SV=2	Q96KR1		ZFR	439.89	363.52	654.97	697.53	515.71	649.25
1392	2323	Q14155-1|ARHG7_HUMAN	216.29	73140	9	25	Isoform 1 of Rho guanine nucleotide exchange factor 7 OS=Homo sapiens OX=9606 GN=ARHGEF7	Q14155	1	ARHG7	1049.7	564.7	720.21	1284.05	609.49	782.81
30	12	P02545|LMNA_HUMAN	470.36	74140	3	69	Prelamin-A/C OS=Homo sapiens OX=9606 GN=LMNA PE=1 SV=1	P02545		LMNA	568.97	549	464.17	582.18	566.72	587.22
1315	1575	Q5VV41|ARHGG_HUMAN	227.52	80105	9	21	Rho guanine nucleotide exchange factor 16 OS=Homo sapiens OX=9606 GN=ARHGEF16 PE=1 SV=1	Q5VV41		ARHGG	452.82	396.68	358.92	491.48	592.27	595.85
1530	2191	Q2M389|WASC4_HUMAN	213.62	136403	7	10	WASH complex subunit 4 OS=Homo sapiens OX=9606 GN=WASHC4 PE=1 SV=2	Q2M389		WASC4	382.03	202.61	287.29	393.61	513.77	526.59
991	510	Q5JRA6|TGO1_HUMAN	286.96	213700	18	15	Transport and Golgi organization protein 1 homolog OS=Homo sapiens OX=9606 GN=MIA3 PE=1 SV=1	Q5JRA6		TGO1	441.69	635.51	613.44	495.38	605.75	602.63
2936	5595	Q32P44|EMAL3_HUMAN	164.57	95197	3	6	Echinoderm microtubule-associated protein-like 3 OS=Homo sapiens OX=9606 GN=EML3 PE=1 SV=1	Q32P44		EMAL3	130.88	0	230.54	8.37	150.59	375.4
2645	9013	P16219|ACADS_HUMAN	139.06	44297	2	13	Short-chain specific acyl-CoA dehydrogenase mitochondrial OS=Homo sapiens OX=9606 GN=ACADS PE=1 SV=1	P16219		ACADS	176.01	238.91	142.86	535.28	487.3	567.29
838	880	Q13616|CUL1_HUMAN	336.33	89678	15	31	Cullin-1 OS=Homo sapiens OX=9606 GN=CUL1 PE=1 SV=2	Q13616		CUL1	1254.95	1445.8	920.07	1645.95	1504.15	1076.72
1966	6034	P62851|RS25_HUMAN	165.78	13742	6	33	40S ribosomal protein S25 OS=Homo sapiens OX=9606 GN=RPS25 PE=1 SV=1	P62851		RS25	592.57	26.03	553	635.7	582.88	611.39
1873	4258	P85037|FOXK1_HUMAN	175.35	75457	5	9	Forkhead box protein K1 OS=Homo sapiens OX=9606 GN=FOXK1 PE=1 SV=1	P85037		FOXK1	341.96	422	453.85	162.43	344.52	383.84
778	874	Q32MZ4-3|LRRF1_HUMAN	307.44	82689	15	25	Isoform 3 of Leucine-rich repeat flightless-interacting protein 1 OS=Homo sapiens OX=9606 GN=LRRFIP1	Q32MZ4	3	LRRF1	1022.46	876.71	673.1	476.26	742.94	594.68
1920	4035	Q13418|ILK_HUMAN	195.03	51419	6	21	Integrin-linked protein kinase OS=Homo sapiens OX=9606 GN=ILK PE=1 SV=2	Q13418		ILK	178.04	206.91	234.35	369.94	139.31	393.84
1205	2450	P23786|CPT2_HUMAN	268.56	73777	12	31	Carnitine O-palmitoyltransferase 2 mitochondrial OS=Homo sapiens OX=9606 GN=CPT2 PE=1 SV=2	P23786		CPT2	530.74	458.59	492.33	665.99	787.78	636.29
1633	5427	Q14116|IL18_HUMAN	167.53	22326	5	42	Interleukin-18 OS=Homo sapiens OX=9606 GN=IL18 PE=1 SV=1	Q14116		IL18	428.34	239.12	74.1	482.27	636.63	592.97
1309	3365	Q9ULA0|DNPEP_HUMAN	239.96	52428	10	31	Aspartyl aminopeptidase OS=Homo sapiens OX=9606 GN=DNPEP PE=1 SV=1	Q9ULA0		DNPEP	197.09	282	282.1	591.56	591.02	592.1
1970	4186	Q9NPQ8-2|RIC8A_HUMAN	197.38	58943	6	20	Isoform 2 of Synembryn-A OS=Homo sapiens OX=9606 GN=RIC8A	Q9NPQ8	2	RIC8A	416.66	219.4	315.2	460.35	408.59	537.63
1612	4771	Q96HS1|PGAM5_HUMAN	213.4	32004	4	18	Serine/threonine-protein phosphatase PGAM5 mitochondrial OS=Homo sapiens OX=9606 GN=PGAM5 PE=1 SV=2	Q96HS1		PGAM5	120.92	116.7	269.99	711.41	367.99	591.68
45	205	Q14697|GANAB_HUMAN	484.54	106874	2	64	Neutral alpha-glucosidase AB OS=Homo sapiens OX=9606 GN=GANAB PE=1 SV=3	Q14697		GANAB	596.09	529.35	727.7	620.5	568.98	600.02
1093	5633	P41567|EIF1_HUMAN	236.24	12732	4	46	Eukaryotic translation initiation factor 1 OS=Homo sapiens OX=9606 GN=EIF1 PE=1 SV=1	P41567		EIF1	715.82	547.71	994.92	549.96	401.89	554.81
1667	2708	O60341-2|KDM1A_HUMAN	251.58	95155	10	17	Isoform 2 of Lysine-specific histone demethylase 1A OS=Homo sapiens OX=9606 GN=KDM1A	O60341	2	KDM1A	422.82	396.05	366.86	467.35	487.81	571.12
981	1280	Q9Y4P3|TBL2_HUMAN	277.79	49798	11	34	Transducin beta-like protein 2 OS=Homo sapiens OX=9606 GN=TBL2 PE=1 SV=1	Q9Y4P3		TBL2	819.42	573	783.37	620.67	793.04	617.6
802	1393	Q08945|SSRP1_HUMAN	263.77	81075	15	28	FACT complex subunit SSRP1 OS=Homo sapiens OX=9606 GN=SSRP1 PE=1 SV=1	Q08945		SSRP1	849	544.15	304.59	783.45	613.25	654.28
1895	5526	O43488|ARK72_HUMAN	201.52	39589	6	21	Aflatoxin B1 aldehyde reductase member 2 OS=Homo sapiens OX=9606 GN=AKR7A2 PE=1 SV=3	O43488		ARK72	530.61	103.16	456.11	582.72	605.9	586.38
1079	1369	P49591|SYSC_HUMAN	286.26	58777	18	44	Serine--tRNA ligase cytoplasmic OS=Homo sapiens OX=9606 GN=SARS1 PE=1 SV=3	P49591		SYSC	867.56	520.16	447.61	305.1	339.01	481.11
1756	3895	Q92882|OSTF1_HUMAN	222.24	23787	7	42	Osteoclast-stimulating factor 1 OS=Homo sapiens OX=9606 GN=OSTF1 PE=1 SV=2	Q92882		OSTF1	267.86	322.78	266.98	365.73	559.84	585.62
1553	5274	Q92600|CNOT9_HUMAN	168.24	33631	4	20	CCR4-NOT transcription complex subunit 9 OS=Homo sapiens OX=9606 GN=CNOT9 PE=1 SV=1	Q92600		CNOT9	460.31	485.11	455.93	583.5	502.64	577.99
2080	6144	Q9HD33-2|RM47_HUMAN	123.17	27086	2	12	Isoform 2 of 39S ribosomal protein L47 mitochondrial OS=Homo sapiens OX=9606 GN=MRPL47	Q9HD33	2	RM47	256.49	133.53	153.82	395.03	543.43	551.17
1169	2005	Q06481-6|APLP2_HUMAN	239.61	87215	9	17	Isoform 6 of Amyloid-like protein 2 OS=Homo sapiens OX=9606 GN=APLP2	Q06481	6	APLP2	182.56	367.99	739.8	669.93	696.6	614.96
2327	15799	P40616-2|ARL1_HUMAN	147.07	18565	3	36	Isoform 2 of ADP-ribosylation factor-like protein 1 OS=Homo sapiens OX=9606 GN=ARL1	P40616	2	ARL1	792.84	742.09	781.79	640.47	660.85	602.97
1167	1398	Q96AE4|FUBP1_HUMAN	251	67560	11	26	Far upstream element-binding protein 1 OS=Homo sapiens OX=9606 GN=FUBP1 PE=1 SV=3	Q96AE4		FUBP1	1200.6	1094.84	1170.44	939.22	1349.4	816.26
1653	3651	Q7L0Y3|TM10C_HUMAN	204.64	47347	5	19	tRNA methyltransferase 10 homolog C OS=Homo sapiens OX=9606 GN=TRMT10C PE=1 SV=2	Q7L0Y3		TM10C	433.22	353.56	353.53	610.31	397.1	578.99
1484	851	O94915|FRYL_HUMAN	253.67	339598	13	8	Protein furry homolog-like OS=Homo sapiens OX=9606 GN=FRYL PE=1 SV=2	O94915		FRYL	416.11	525.56	336.64	592.97	401.67	578.94
1156	1283	O60645|EXOC3_HUMAN	270.84	85567	12	23	Exocyst complex component 3 OS=Homo sapiens OX=9606 GN=EXOC3 PE=1 SV=3	O60645		EXOC3	401.96	359.01	452.95	487.38	567.68	563.76
1215	1195	O43172-2|PRP4_HUMAN	264.09	58321	12	29	Isoform 2 of U4/U6 small nuclear ribonucleoprotein Prp4 OS=Homo sapiens OX=9606 GN=PRPF4	O43172	2	PRP4	467.18	370.95	493.92	611.59	559.11	578.14
1311	1257	O43290|SNUT1_HUMAN	258.57	90255	11	18	U4/U6.U5 tri-snRNP-associated protein 1 OS=Homo sapiens OX=9606 GN=SART1 PE=1 SV=1	O43290		SNUT1	237.38	451.04	639.75	762.66	529.37	578.03
1425	4411	P53999|TCP4_HUMAN	238.06	14395	9	46	Activated RNA polymerase II transcriptional coactivator p15 OS=Homo sapiens OX=9606 GN=SUB1 PE=1 SV=3	P53999		TCP4	590.8	619.12	588.92	545.78	410.35	519.23
1000	1556	Q5H9R7-6|PP6R3_HUMAN	233.55	94445	11	18	Isoform 6 of Serine/threonine-protein phosphatase 6 regulatory subunit 3 OS=Homo sapiens OX=9606 GN=PPP6R3	Q5H9R7	6	PP6R3	270.3	384.15	307.31	434.7	325.58	508.84
1258	2275	Q9H6R4-4|NOL6_HUMAN	249.14	127320	11	16	Isoform 4 of Nucleolar protein 6 OS=Homo sapiens OX=9606 GN=NOL6	Q9H6R4	4	NOL6	337.07	475.69	389.37	516.31	472.87	573.89
1121	1475	O00203|AP3B1_HUMAN	285.2	121320	13	13	AP-3 complex subunit beta-1 OS=Homo sapiens OX=9606 GN=AP3B1 PE=1 SV=3	O00203		AP3B1	415.12	256.7	440.68	431.19	470.87	518.99
1764	3867	Q9NZL4-3|HPBP1_HUMAN	238.83	44303	10	41	Isoform 3 of Hsp70-binding protein 1 OS=Homo sapiens OX=9606 GN=HSPBP1	Q9NZL4	3	HPBP1	215.72	158.42	83.79	336.61	305.07	479.7
1623	5900	P28062|PSB8_HUMAN	189.75	30354	4	17	Proteasome subunit beta type-8 OS=Homo sapiens OX=9606 GN=PSMB8 PE=1 SV=3	P28062		PSB8	763.97	715.62	877.24	846.86	763.41	704.04
2444	4452	Q99805|TM9S2_HUMAN	152.22	75776	5	11	Transmembrane 9 superfamily member 2 OS=Homo sapiens OX=9606 GN=TM9SF2 PE=1 SV=1	Q99805		TM9S2	7.89	24.51	24.87	215.9	217.57	476.16
1562	3551	P57678|GEMI4_HUMAN	177.27	120037	6	8	Gem-associated protein 4 OS=Homo sapiens OX=9606 GN=GEMIN4 PE=1 SV=2	P57678		GEMI4	117.21	170.49	210.39	373.74	271.36	428.06
1243	4782	P04632|CPNS1_HUMAN	231.55	28316	6	57	Calpain small subunit 1 OS=Homo sapiens OX=9606 GN=CAPNS1 PE=1 SV=1	P04632		CPNS1	890.68	1064.35	730.91	472.01	1195.9	570.6
1386	4013	P47712|PA24A_HUMAN	237.58	85239	7	14	Cytosolic phospholipase A2 OS=Homo sapiens OX=9606 GN=PLA2G4A PE=1 SV=2	P47712		PA24A	358.03	342.11	309.45	319.91	392.48	483.3
1946	5421	P54725-3|RD23A_HUMAN	213.22	39538	8	42	Isoform 3 of UV excision repair protein RAD23 homolog A OS=Homo sapiens OX=9606 GN=RAD23A	P54725	3	RD23A	331.69	203.01	190.41	471.28	602.09	531.36
997	1015	O14776-2|TCRG1_HUMAN	279.51	121690	16	16	Isoform 2 of Transcription elongation regulator 1 OS=Homo sapiens OX=9606 GN=TCERG1	O14776	2	TCRG1	855.43	861.46	584.96	473.4	364.58	511.46
1723	2064	P50748|KNTC1_HUMAN	241.42	250746	9	7	Kinetochore-associated protein 1 OS=Homo sapiens OX=9606 GN=KNTC1 PE=1 SV=1	P50748		KNTC1	113.1	427.29	179.53	420.77	373.56	567.2
839	2422	Q13217|DNJC3_HUMAN	264.31	57580	11	43	DnaJ homolog subfamily C member 3 OS=Homo sapiens OX=9606 GN=DNAJC3 PE=1 SV=1	Q13217		DNJC3	712.2	695.56	739.28	696.09	644.98	600.45
2386	6175	O14773|TPP1_HUMAN	166.92	61248	3	7	Tripeptidyl-peptidase 1 OS=Homo sapiens OX=9606 GN=TPP1 PE=1 SV=2	O14773		TPP1	107.91	213.05	252.08	453.96	603.29	555.75
773	973	Q8IX12-2|CCAR1_HUMAN	313.67	131043	19	22	Isoform 2 of Cell division cycle and apoptosis regulator protein 1 OS=Homo sapiens OX=9606 GN=CCAR1	Q8IX12	2	CCAR1	498.24	579.61	590.98	794.96	832.76	686.44
350	2130	Q01105-2|SET_HUMAN	329	32103	3	45	Isoform 2 of Protein SET OS=Homo sapiens OX=9606 GN=SET	Q01105	2	SET	267.95	303.99	402.03	626.78	284.36	566.47
519	661	P63010|AP2B1_HUMAN	310.81	104553	9	31	AP-2 complex subunit beta OS=Homo sapiens OX=9606 GN=AP2B1 PE=1 SV=1	P63010		AP2B1	313.08	223.62	261.17	323.24	257.66	443.39
2214	5832	P53611|PGTB2_HUMAN	131.71	36924	3	11	Geranylgeranyl transferase type-2 subunit beta OS=Homo sapiens OX=9606 GN=RABGGTB PE=1 SV=2	P53611		PGTB2	543.4	220.12	322.43	482.36	430.23	562.7
1908	5348	Q8NAV1|PR38A_HUMAN	187.61	37477	4	19	Pre-mRNA-splicing factor 38A OS=Homo sapiens OX=9606 GN=PRPF38A PE=1 SV=1	Q8NAV1		PR38A	375.15	371.54	455.28	312.75	441.01	493.76
852	878	Q8TAQ2|SMRC2_HUMAN	304.01	132879	14	22	SWI/SNF complex subunit SMARCC2 OS=Homo sapiens OX=9606 GN=SMARCC2 PE=1 SV=1	Q8TAQ2		SMRC2	647.89	398.19	705.27	824.61	514.71	561.5
1618	3507	P0DN76|U2AF5_HUMAN	191.46	27872	5	34	Splicing factor U2AF 35 kDa subunit-like protein OS=Homo sapiens OX=9606 GN=U2AF1L5 PE=1 SV=1	P0DN76		U2AF5	320.09	526.58	345.12	599.37	513.32	554.87
1200	1882	Q9UQB8-2|BAIP2_HUMAN	285.04	59014	11	34	Isoform 2 of Brain-specific angiogenesis inhibitor 1-associated protein 2 OS=Homo sapiens OX=9606 GN=BAIAP2	Q9UQB8	2	BAIP2	450.63	352.7	393.91	1170.4	1626.35	1080.95
1429	4869	Q9Y221|NIP7_HUMAN	221.9	20463	7	61	60S ribosome subunit biogenesis protein NIP7 homolog OS=Homo sapiens OX=9606 GN=NIP7 PE=1 SV=1	Q9Y221		NIP7	626.54	711.5	461.63	663.92	706.39	574.41
1568	2895	Q14320|FA50A_HUMAN	214.39	40242	7	30	Protein FAM50A OS=Homo sapiens OX=9606 GN=FAM50A PE=1 SV=2	Q14320		FA50A	358.52	359.52	195.9	499.15	375.76	527.68
1161	3242	O94874|UFL1_HUMAN	246.97	89595	9	17	E3 UFM1-protein ligase 1 OS=Homo sapiens OX=9606 GN=UFL1 PE=1 SV=2	O94874		UFL1	269.41	405.07	369.6	493.09	398.81	483.14
652	677	O00267-2|SPT5H_HUMAN	331.84	120499	21	27	Isoform 2 of Transcription elongation factor SPT5 OS=Homo sapiens OX=9606 GN=SUPT5H	O00267	2	SPT5H	858.35	749.86	736.79	958.87	740.16	673.62
995	2663	Q13131-2|AAPK1_HUMAN	271.81	65523	13	29	Isoform 2 of 5'-AMP-activated protein kinase catalytic subunit alpha-1 OS=Homo sapiens OX=9606 GN=PRKAA1	Q13131	2	AAPK1	1019.1	725.93	697.47	1299.2	1050.9	820.33
1353	765	P49750|YLPM1_HUMAN	257.02	241643	15	10	YLP motif-containing protein 1 OS=Homo sapiens OX=9606 GN=YLPM1 PE=1 SV=4	P49750		YLPM1	267.6	52.03	169.36	344.62	171.29	421.19
1855	3499	Q8WWI5|CTL1_HUMAN	193.73	73302	6	13	Choline transporter-like protein 1 OS=Homo sapiens OX=9606 GN=SLC44A1 PE=1 SV=1	Q8WWI5		CTL1	367.86	652.08	385.81	956.9	692.63	626.36
1636	3631	P13861-2|KAP2_HUMAN	223.39	43067	8	27	Isoform 2 of cAMP-dependent protein kinase type II-alpha regulatory subunit OS=Homo sapiens OX=9606 GN=PRKAR2A	P13861	2	KAP2	310.07	146.75	415.14	363.72	547.2	493.12
1245	3117	O75569|PRKRA_HUMAN	234.53	34404	7	33	Interferon-inducible double-stranded RNA-dependent protein kinase activator A OS=Homo sapiens OX=9606 GN=PRKRA PE=1 SV=1	O75569		PRKRA	646.2	628.03	642.26	755.6	772.76	635.91
1903	3456	Q13769|THOC5_HUMAN	194.59	78508	6	12	THO complex subunit 5 homolog OS=Homo sapiens OX=9606 GN=THOC5 PE=1 SV=2	Q13769		THOC5	158.53	147.37	224.11	115.44	300.06	409
1437	4194	P41227|NAA10_HUMAN	197.05	26458	5	36	N-alpha-acetyltransferase 10 OS=Homo sapiens OX=9606 GN=NAA10 PE=1 SV=1	P41227		NAA10	198.48	398.78	272.33	400.61	273.46	448.06
1805	2334	Q96J02-2|ITCH_HUMAN	208.45	98676	9	18	Isoform 2 of E3 ubiquitin-protein ligase Itchy homolog OS=Homo sapiens OX=9606 GN=ITCH	Q96J02	2	ITCH	410.22	392.15	349.53	516.51	410.69	509.03
517	2407	P16989|YBOX3_HUMAN	319.62	40090	2	46	Y-box-binding protein 3 OS=Homo sapiens OX=9606 GN=YBX3 PE=1 SV=4	P16989		YBOX3	169.87	342.57	478.14	0	391.37	368.28
1436	1730	P46087|NOP2_HUMAN	228.01	89302	8	18	Probable 28S rRNA (cytosine(4447)-C(5))-methyltransferase OS=Homo sapiens OX=9606 GN=NOP2 PE=1 SV=2	P46087		NOP2	327.59	411.92	355.22	510.83	489.7	545.74
2776	6777	Q96EK6|GNA1_HUMAN	169.92	20749	5	51	Glucosamine 6-phosphate N-acetyltransferase OS=Homo sapiens OX=9606 GN=GNPNAT1 PE=1 SV=1	Q96EK6		GNA1	342.95	495.08	0	537.07	487.71	534.14
1584	4216	P13984|T2FB_HUMAN	224.56	28380	7	40	General transcription factor IIF subunit 2 OS=Homo sapiens OX=9606 GN=GTF2F2 PE=1 SV=2	P13984		T2FB	477.01	370.6	460.9	518.77	605.77	544.31
1260	1975	Q96ST3|SIN3A_HUMAN	236.63	145175	11	11	Paired amphipathic helix protein Sin3a OS=Homo sapiens OX=9606 GN=SIN3A PE=1 SV=2	Q96ST3		SIN3A	297.49	101.2	205.3	416.37	535.3	499.23
1021	2953	P48735|IDHP_HUMAN	257.86	50909	11	29	Isocitrate dehydrogenase [NADP] mitochondrial OS=Homo sapiens OX=9606 GN=IDH2 PE=1 SV=2	P48735		IDHP	436.28	525.99	246.44	558.71	989.85	560.93
1793	2965	Q9UEW8-2|STK39_HUMAN	213.16	57937	6	20	Isoform 2 of STE20/SPS1-related proline-alanine-rich protein kinase OS=Homo sapiens OX=9606 GN=STK39	Q9UEW8	2	STK39	289.49	258.25	204.96	154.2	122.18	343.72
954	2040	Q8WYA6|CTBL1_HUMAN	241.02	65173	11	24	Beta-catenin-like protein 1 OS=Homo sapiens OX=9606 GN=CTNNBL1 PE=1 SV=1	Q8WYA6		CTBL1	345.75	303.36	356.15	450.03	528.37	525.75
1188	2971	P51648|AL3A2_HUMAN	254.67	54848	9	29	Aldehyde dehydrogenase family 3 member A2 OS=Homo sapiens OX=9606 GN=ALDH3A2 PE=1 SV=1	P51648		AL3A2	393	186.84	346.23	563.92	683.44	543.07
1135	863	Q8N3C0|ASCC3_HUMAN	263.51	251458	15	11	Activating signal cointegrator 1 complex subunit 3 OS=Homo sapiens OX=9606 GN=ASCC3 PE=1 SV=3	Q8N3C0		ASCC3	253.69	309.84	265.36	519.38	453.59	524.4
1160	1997	P04439-2|HLAA_HUMAN	255.89	41394	8	48	Isoform 2 of HLA class I histocompatibility antigen A alpha chain OS=Homo sapiens OX=9606 GN=HLA-A	P04439	2	HLAA	731.59	854.09	589.78	666.74	126.16	535.57
1328	2744	P41240|CSK_HUMAN	231.15	50704	8	27	Tyrosine-protein kinase CSK OS=Homo sapiens OX=9606 GN=CSK PE=1 SV=1	P41240		CSK	245.9	322.49	308.13	394.8	392.66	469.56
1760	3853	Q9GZZ1|NAA50_HUMAN	198.52	19398	6	47	N-alpha-acetyltransferase 50 OS=Homo sapiens OX=9606 GN=NAA50 PE=1 SV=1	Q9GZZ1		NAA50	340.13	391.19	308.39	488.17	542.66	531.3
872	2204	Q9BQL6|FERM1_HUMAN	288.55	77437	11	22	Fermitin family homolog 1 OS=Homo sapiens OX=9606 GN=FERMT1 PE=1 SV=1	Q9BQL6		FERM1	488.47	465.71	505.51	743.46	805.73	662.84
1177	3054	Q86UE4|LYRIC_HUMAN	238.34	63837	9	19	Protein LYRIC OS=Homo sapiens OX=9606 GN=MTDH PE=1 SV=2	Q86UE4		LYRIC	649.84	566.43	421.05	557.62	499.11	530.16
831	629	P25205-2|MCM3_HUMAN	296.85	95908	19	27	Isoform 2 of DNA replication licensing factor MCM3 OS=Homo sapiens OX=9606 GN=MCM3	P25205	2	MCM3	863.46	629.57	726.67	912.25	702.14	637.58
2060	4201	Q9Y376|CAB39_HUMAN	175.59	39869	7	23	Calcium-binding protein 39 OS=Homo sapiens OX=9606 GN=CAB39 PE=1 SV=1	Q9Y376		CAB39	482.06	453.54	360.36	525.11	588.85	542.92
1357	2963	Q6FI81-3|CPIN1_HUMAN	233.19	32213	10	50	Isoform 3 of Anamorsin OS=Homo sapiens OX=9606 GN=CIAPIN1	Q6FI81	3	CPIN1	423.77	527.58	568.72	591.75	762.05	602.15
2134	4687	P49903|SPS1_HUMAN	219.46	42911	4	19	Selenide water dikinase 1 OS=Homo sapiens OX=9606 GN=SEPHS1 PE=1 SV=2	P49903		SPS1	388.13	412.56	419.93	324.19	104.96	369.51
1478	5140	P57088|TMM33_HUMAN	192.19	27978	6	26	Transmembrane protein 33 OS=Homo sapiens OX=9606 GN=TMEM33 PE=1 SV=2	P57088		TMM33	358.37	315.79	278.35	455.81	350.91	488.58
1424	1660	O15294|OGT1_HUMAN	270.29	116924	13	22	UDP-N-acetylglucosamine--peptide N-acetylglucosaminyltransferase 110 kDa subunit OS=Homo sapiens OX=9606 GN=OGT PE=1 SV=3	O15294		OGT1	378.87	185.88	217.59	340.16	366.44	455.26
1996	3837	Q6NUK1|SCMC1_HUMAN	208.05	53354	7	22	Calcium-binding mitochondrial carrier protein SCaMC-1 OS=Homo sapiens OX=9606 GN=SLC25A24 PE=1 SV=2	Q6NUK1		SCMC1	97.7	0	13.68	200.33	113.14	328.49
1034	3939	O96019|ACL6A_HUMAN	226.62	47461	9	34	Actin-like protein 6A OS=Homo sapiens OX=9606 GN=ACTL6A PE=1 SV=1	O96019		ACL6A	497.34	297.96	283.91	560.69	503.51	525.58
1545	3049	Q01780|EXOSX_HUMAN	231.47	100831	11	21	Exosome component 10 OS=Homo sapiens OX=9606 GN=EXOSC10 PE=1 SV=2	Q01780		EXOSX	237.68	199.67	185.12	388.55	448.84	464.77
1566	2902	Q9BYT8|NEUL_HUMAN	199.13	80652	6	14	Neurolysin mitochondrial OS=Homo sapiens OX=9606 GN=NLN PE=1 SV=1	Q9BYT8		NEUL	255.3	170.51	176.55	370.09	328.55	460.99
1889	4343	P23919|KTHY_HUMAN	186.65	23819	7	41	Thymidylate kinase OS=Homo sapiens OX=9606 GN=DTYMK PE=1 SV=4	P23919		KTHY	291.88	441.87	190.72	229.87	276.73	443.16
969	364	P46939-2|UTRO_HUMAN	312.85	394970	24	11	Isoform 2 of Utrophin OS=Homo sapiens OX=9606 GN=UTRN	P46939	2	UTRO	149.7	165.57	154.1	264.35	265.04	402.17
1197	1148	Q9UMD9-2|COHA1_HUMAN	261.39	142344	12	12	Isoform 2 of Collagen alpha-1(XVII) chain OS=Homo sapiens OX=9606 GN=COL17A1	Q9UMD9	2	COHA1	523.78	393.78	435.88	396.43	382.43	463.52
1433	2274	Q6PI48|SYDM_HUMAN	228.58	73563	11	28	Aspartate--tRNA ligase mitochondrial OS=Homo sapiens OX=9606 GN=DARS2 PE=1 SV=1	Q6PI48		SYDM	187.97	183.45	291.96	614.26	382.56	517.04
1922	5635	P46776|RL27A_HUMAN	178.26	16561	5	32	60S ribosomal protein L27a OS=Homo sapiens OX=9606 GN=RPL27A PE=1 SV=2	P46776		RL27A	852.37	748.9	410.43	364.04	358.3	440.12
1662	2277	O94855|SC24D_HUMAN	237.94	113010	8	15	Protein transport protein Sec24D OS=Homo sapiens OX=9606 GN=SEC24D PE=1 SV=2	O94855		SC24D	786.35	804.99	876.78	172.61	442.86	452.21
1465	2573	Q969G3-2|SMCE1_HUMAN	213.13	41780	8	26	Isoform 2 of SWI/SNF-related matrix-associated actin-dependent regulator of chromatin subfamily E member 1 OS=Homo sapiens OX=9606 GN=SMARCE1	Q969G3	2	SMCE1	258.67	237.6	329.97	586.99	558.73	515.91
1739	2047	Q86TI2|DPP9_HUMAN	226.28	98263	9	16	Dipeptidyl peptidase 9 OS=Homo sapiens OX=9606 GN=DPP9 PE=1 SV=3	Q86TI2		DPP9	294.04	302.72	194	452.64	453.84	483.99
830	3490	Q9NR31|SAR1A_HUMAN	278.47	22367	7	64	GTP-binding protein SAR1a OS=Homo sapiens OX=9606 GN=SAR1A PE=1 SV=1	Q9NR31		SAR1A	643	243.37	386.25	93.07	253.05	355.64
2192	5326	O15511|ARPC5_HUMAN	174.12	16320	4	46	Actin-related protein 2/3 complex subunit 5 OS=Homo sapiens OX=9606 GN=ARPC5 PE=1 SV=3	O15511		ARPC5	492.06	493.94	511.51	423.79	517.59	498.39
2433	6393	Q9UBW8|CSN7A_HUMAN	150.3	30277	3	23	COP9 signalosome complex subunit 7a OS=Homo sapiens OX=9606 GN=COPS7A PE=1 SV=1	Q9UBW8		CSN7A	564.57	544.06	547.31	460.04	525.4	510.35
2584	6449	Q14181|DPOA2_HUMAN	118.48	65948	2	5	DNA polymerase alpha subunit B OS=Homo sapiens OX=9606 GN=POLA2 PE=1 SV=2	Q14181		DPOA2	268.24	186.76	181.56	301.17	432.19	485.37
1111	1987	P41743|KPCI_HUMAN	285.96	68262	10	34	Protein kinase C iota type OS=Homo sapiens OX=9606 GN=PRKCI PE=1 SV=2	P41743		KPCI	536.69	554.09	537.15	571.14	586.75	517.73
2792	76887	O14662-5|STX16_HUMAN	146.26	36545	2	15	Isoform E of Syntaxin-16 OS=Homo sapiens OX=9606 GN=STX16	O14662	5	STX16	425.27	453.89	284.58	269.57	243.43	499.65
1481	4174	Q8NBP7|PCSK9_HUMAN	229.63	74286	6	16	Proprotein convertase subtilisin/kexin type 9 OS=Homo sapiens OX=9606 GN=PCSK9 PE=1 SV=3	Q8NBP7		PCSK9	83.78	131.32	106.76	435.22	391.43	453.97
1744	5482	P47985|UCRI_HUMAN	155.22	29668	3	19	Cytochrome b-c1 complex subunit Rieske mitochondrial OS=Homo sapiens OX=9606 GN=UQCRFS1 PE=1 SV=2	P47985		UCRI	451.65	657.38	623.05	609.02	620.32	539.84
2306	6364	Q9UKD2|MRT4_HUMAN	139.54	27560	3	21	mRNA turnover protein 4 homolog OS=Homo sapiens OX=9606 GN=MRTO4 PE=1 SV=2	Q9UKD2		MRT4	330.69	316.52	414.5	401.67	473.02	502.34
826	1789	Q9H7D7-2|WDR26_HUMAN	264.63	70460	10	28	Isoform 2 of WD repeat-containing protein 26 OS=Homo sapiens OX=9606 GN=WDR26	Q9H7D7	2	WDR26	416.4	463.94	398.63	587.1	522.19	510.15
1302	2720	P07099|HYEP_HUMAN	287.98	52949	10	33	Epoxide hydrolase 1 OS=Homo sapiens OX=9606 GN=EPHX1 PE=1 SV=1	P07099		HYEP	380.99	440.99	482.81	515.76	562.04	522.9
1990	4099	P49821|NDUV1_HUMAN	191.06	50817	9	29	NADH dehydrogenase [ubiquinone] flavoprotein 1 mitochondrial OS=Homo sapiens OX=9606 GN=NDUFV1 PE=1 SV=4	P49821		NDUV1	123.09	101.02	149.64	836.51	478.96	507.71
1416	5262	Q13630|FCL_HUMAN	213.99	35893	5	24	GDP-L-fucose synthase OS=Homo sapiens OX=9606 GN=TSTA3 PE=1 SV=1	Q13630		FCL	448.46	275.93	326.69	428.6	460.32	484.47
2359	8956	P62314|SMD1_HUMAN	136.33	13282	2	29	Small nuclear ribonucleoprotein Sm D1 OS=Homo sapiens OX=9606 GN=SNRPD1 PE=1 SV=1	P62314		SMD1	399.81	426.03	736.48	573.04	520.94	505.9
1503	3664	Q8WVV4|POF1B_HUMAN	237.38	68065	8	19	Protein POF1B OS=Homo sapiens OX=9606 GN=POF1B PE=1 SV=3	Q8WVV4		POF1B	148.23	56.55	149.22	331.76	359.18	450.33
1877	5885	P35270|SPRE_HUMAN	185.64	28048	5	27	Sepiapterin reductase OS=Homo sapiens OX=9606 GN=SPR PE=1 SV=1	P35270		SPRE	372.47	349.81	495.5	517.97	468.1	504.99
2119	5203	Q8N684-3|CPSF7_HUMAN	197.67	56375	5	12	Isoform 3 of Cleavage and polyadenylation specificity factor subunit 7 OS=Homo sapiens OX=9606 GN=CPSF7	Q8N684	3	CPSF7	423	453.07	277.73	540.84	485.39	506.29
1891	2457	Q6NVY1|HIBCH_HUMAN	183.06	43482	7	22	3-hydroxyisobutyryl-CoA hydrolase mitochondrial OS=Homo sapiens OX=9606 GN=HIBCH PE=1 SV=2	Q6NVY1		HIBCH	134.09	92.54	156.86	438.6	325.37	465.13
2336	4501	Q8TE77|SSH3_HUMAN	163.16	72996	3	8	Protein phosphatase Slingshot homolog 3 OS=Homo sapiens OX=9606 GN=SSH3 PE=1 SV=2	Q8TE77		SSH3	0	389.98	411.19	557.95	392.49	503.62
1695	2449	Q12874|SF3A3_HUMAN	197.79	58849	9	30	Splicing factor 3A subunit 3 OS=Homo sapiens OX=9606 GN=SF3A3 PE=1 SV=1	Q12874		SF3A3	578.83	159.37	465.9	434	294.94	406.52
1096	3273	Q9BRP8|PYM1_HUMAN	234.36	22656	6	48	Partner of Y14 and mago OS=Homo sapiens OX=9606 GN=PYM1 PE=1 SV=1	Q9BRP8		PYM1	514.66	540.2	555.52	585.6	498.02	524.29
1120	1968	P61201|CSN2_HUMAN	260.62	51597	11	33	COP9 signalosome complex subunit 2 OS=Homo sapiens OX=9606 GN=COPS2 PE=1 SV=1	P61201		CSN2	375.87	577.41	570.33	673.95	560.99	552.35
42	8	Q9BQE3|TBA1C_HUMAN	431.29	49895	2	80	Tubulin alpha-1C chain OS=Homo sapiens OX=9606 GN=TUBA1C PE=1 SV=1	Q9BQE3		TBA1C	737.07	929.1	934.1	994.2	836.94	710.18
1262	2213	Q8NFQ8|TOIP2_HUMAN	262.35	51263	9	34	Torsin-1A-interacting protein 2 OS=Homo sapiens OX=9606 GN=TOR1AIP2 PE=1 SV=1	Q8NFQ8		TOIP2	224.75	246.9	309.81	452.14	381.88	470.3
1525	3737	Q92552-2|RT27_HUMAN	195.76	49150	6	22	Isoform 2 of 28S ribosomal protein S27 mitochondrial OS=Homo sapiens OX=9606 GN=MRPS27	Q92552	2	RT27	200.25	96.17	236.13	459.65	464.36	500.9
2234	4101	Q92544|TM9S4_HUMAN	200.57	74519	8	16	Transmembrane 9 superfamily member 4 OS=Homo sapiens OX=9606 GN=TM9SF4 PE=1 SV=2	Q92544		TM9S4	136.18	110.17	253.89	311.03	175.77	346.06
1656	4541	O95232|LC7L3_HUMAN	220.24	51466	7	24	Luc7-like protein 3 OS=Homo sapiens OX=9606 GN=LUC7L3 PE=1 SV=2	O95232		LC7L3	520.82	461.4	370.12	482.28	457.66	494.84
227	916	P35580|MYH10_HUMAN	350.44	228997	3	9	Myosin-10 OS=Homo sapiens OX=9606 GN=MYH10 PE=1 SV=3	P35580		MYH10	16.97	356.32	407.05	553.07	214.29	499.09
1427	4016	P78318|IGBP1_HUMAN	212.69	39222	7	22	Immunoglobulin-binding protein 1 OS=Homo sapiens OX=9606 GN=IGBP1 PE=1 SV=1	P78318		IGBP1	192.09	305.36	256.79	544.17	304.44	490.2
1910	5454	P17931|LEG3_HUMAN	184.02	26152	4	20	Galectin-3 OS=Homo sapiens OX=9606 GN=LGALS3 PE=1 SV=5	P17931		LEG3	551.36	273.83	304.5	290.89	182.84	343.04
1459	5984	O60869|EDF1_HUMAN	182.95	16369	4	30	Endothelial differentiation-related factor 1 OS=Homo sapiens OX=9606 GN=EDF1 PE=1 SV=1	O60869		EDF1	1217.8	1057.54	1165.3	887.7	710.7	678.51
985	864	Q92538-3|GBF1_HUMAN	282.91	206015	14	12	Isoform 3 of Golgi-specific brefeldin A-resistance guanine nucleotide exchange factor 1 OS=Homo sapiens OX=9606 GN=GBF1	Q92538	3	GBF1	425.12	524.12	430.41	451.33	382.51	465.09
2287	5603	P48960-2|AGRE5_HUMAN	194.72	81743	6	16	Isoform 2 of Adhesion G protein-coupled receptor E5 OS=Homo sapiens OX=9606 GN=ADGRE5	P48960	2	AGRE5	207.07	82.57	151.09	151.3	419.48	451.62
1937	5327	Q9BYD1|RM13_HUMAN	191.12	20692	5	48	39S ribosomal protein L13 mitochondrial OS=Homo sapiens OX=9606 GN=MRPL13 PE=1 SV=1	Q9BYD1		RM13	103.54	161.08	154.5	333.1	493.61	488.68
1470	6042	O95881|TXD12_HUMAN	190.23	19206	5	31	Thioredoxin domain-containing protein 12 OS=Homo sapiens OX=9606 GN=TXNDC12 PE=1 SV=1	O95881		TXD12	781.07	345.92	155.46	733.01	1162.9	774.85
1253	2119	P09543|CN37_HUMAN	242.97	47579	10	32	2' 3'-cyclic-nucleotide 3'-phosphodiesterase OS=Homo sapiens OX=9606 GN=CNP PE=1 SV=2	P09543		CN37	289.62	371.39	245.67	594.13	393.46	494.67
1854	4287	Q8NHH9-5|ATLA2_HUMAN	219.15	64522	4	17	Isoform 5 of Atlastin-2 OS=Homo sapiens OX=9606 GN=ATL2	Q8NHH9	5	ATLA2	214.31	176.35	212.19	447.94	482.1	481.5
1573	5189	O00560-2|SDCB1_HUMAN	182.71	32316	5	29	Isoform 2 of Syntenin-1 OS=Homo sapiens OX=9606 GN=SDCBP	O00560	2	SDCB1	362.44	230.94	156.37	199.78	299.09	372.86
2424	4392	P53602|MVD1_HUMAN	136.31	43405	4	18	Diphosphomevalonate decarboxylase OS=Homo sapiens OX=9606 GN=MVD PE=1 SV=1	P53602		MVD1	189.5	75.5	62.22	155.88	173.66	371.32
1210	1471	Q9BZQ8|NIBA1_HUMAN	223.62	103135	10	17	Protein Niban 1 OS=Homo sapiens OX=9606 GN=NIBAN1 PE=1 SV=1	Q9BZQ8		NIBA1	1562.15	1486.65	1283.4	485.12	538.66	492.99
874	815	Q9UQ35|SRRM2_HUMAN	287.82	299616	16	9	Serine/arginine repetitive matrix protein 2 OS=Homo sapiens OX=9606 GN=SRRM2 PE=1 SV=2	Q9UQ35		SRRM2	1129.05	1097.01	858.75	1230	985.63	741.71
1528	3905	Q92734-2|TFG_HUMAN	250.95	43020	9	37	Isoform 2 of Protein TFG OS=Homo sapiens OX=9606 GN=TFG	Q92734	2	TFG	512.6	317.39	503.14	484.98	686.92	515.26
1504	2668	P50995-2|ANX11_HUMAN	222.07	51242	7	18	Isoform 2 of Annexin A11 OS=Homo sapiens OX=9606 GN=ANXA11	P50995	2	ANX11	1407.8	1464.6	1633.45	430.17	601.89	515.3
2294	5799	O15541|R113A_HUMAN	147.35	38787	2	11	E3 ubiquitin-protein ligase RNF113A OS=Homo sapiens OX=9606 GN=RNF113A PE=1 SV=1	O15541		R113A	336.71	428.96	270.02	248.44	492.31	487.28
2133	5117	Q9UMY4|SNX12_HUMAN	173.76	18885	6	50	Sorting nexin-12 OS=Homo sapiens OX=9606 GN=SNX12 PE=1 SV=4	Q9UMY4		SNX12	253.6	299.85	364.29	421.03	324.41	483.94
1402	2675	P50579-3|MAP2_HUMAN	212.14	50497	6	17	Isoform 3 of Methionine aminopeptidase 2 OS=Homo sapiens OX=9606 GN=METAP2	P50579	3	MAP2	400.61	360.73	393.31	473.46	484.01	481.87
2337	5752	P51809|VAMP7_HUMAN	171.28	24935	4	35	Vesicle-associated membrane protein 7 OS=Homo sapiens OX=9606 GN=VAMP7 PE=1 SV=3	P51809		VAMP7	418.86	523.62	408.2	601.16	521.67	504.6
1497	5678	Q8WVY7|UBCP1_HUMAN	202.96	36805	6	18	Ubiquitin-like domain-containing CTD phosphatase 1 OS=Homo sapiens OX=9606 GN=UBLCP1 PE=1 SV=2	Q8WVY7		UBCP1	340.86	311.24	145.8	492.18	319.71	486.29
2593	6700	Q9UPT9-2|UBP22_HUMAN	154.2	58179	3	10	Isoform 2 of Ubiquitin carboxyl-terminal hydrolase 22 OS=Homo sapiens OX=9606 GN=USP22	Q9UPT9	2	UBP22	16.9	108.56	240.7	345.15	451.12	473.09
2390	20017	Q9UI30|TR112_HUMAN	145.62	14199	3	32	Multifunctional methyltransferase subunit TRM112-like protein OS=Homo sapiens OX=9606 GN=TRMT112 PE=1 SV=1	Q9UI30		TR112	161.23	162.34	189.59	421.06	398.26	480.52
1288	5816	P62266|RS23_HUMAN	194.49	15808	5	43	40S ribosomal protein S23 OS=Homo sapiens OX=9606 GN=RPS23 PE=1 SV=3	P62266		RS23	625.86	467.48	100.84	787.61	1051.56	637.44
1062	4143	Q14914|PTGR1_HUMAN	228.88	35870	8	35	Prostaglandin reductase 1 OS=Homo sapiens OX=9606 GN=PTGR1 PE=1 SV=2	Q14914		PTGR1	462.1	528.85	403.82	464.09	559.64	487.93
1866	3812	Q9H1E3|NUCKS_HUMAN	170.6	27296	5	26	Nuclear ubiquitous casein and cyclin-dependent kinase substrate 1 OS=Homo sapiens OX=9606 GN=NUCKS1 PE=1 SV=1	Q9H1E3		NUCKS	148.06	207.5	253.06	520.6	550.88	501.98
1976	3826	P67775|PP2AA_HUMAN	230.02	35594	9	52	Serine/threonine-protein phosphatase 2A catalytic subunit alpha isoform OS=Homo sapiens OX=9606 GN=PPP2CA PE=1 SV=1	P67775		PP2AA	335.52	279.35	261.85	410.17	666.55	470.27
1637	2189	O75153|CLU_HUMAN	235.02	146669	10	11	Clustered mitochondria protein homolog OS=Homo sapiens OX=9606 GN=CLUH PE=1 SV=2	O75153		CLU	155.61	126.45	82.44	265.68	256.11	385.63
1057	1247	O94901-9|SUN1_HUMAN	257.03	101932	12	21	Isoform 9 of SUN domain-containing protein 1 OS=Homo sapiens OX=9606 GN=SUN1	O94901	9	SUN1	356.79	270.96	196.84	473.1	494.14	479.93
861	762	Q6WCQ1-3|MPRIP_HUMAN	291.2	114049	17	24	Isoform 3 of Myosin phosphatase Rho-interacting protein OS=Homo sapiens OX=9606 GN=MPRIP	Q6WCQ1	3	MPRIP	394.54	305.14	291.14	455.03	402.7	472.61
1595	4588	Q96EP5|DAZP1_HUMAN	198.55	43383	7	26	DAZ-associated protein 1 OS=Homo sapiens OX=9606 GN=DAZAP1 PE=1 SV=1	Q96EP5		DAZP1	482.92	859.83	357.45	814.87	356.38	518.31
1439	3642	P55039|DRG2_HUMAN	216.48	40746	7	25	Developmentally-regulated GTP-binding protein 2 OS=Homo sapiens OX=9606 GN=DRG2 PE=1 SV=1	P55039		DRG2	308.71	328.75	226.7	447.54	301.73	451.41
1193	3396	P62873|GBB1_HUMAN	252.92	37377	5	48	Guanine nucleotide-binding protein G(I)/G(S)/G(T) subunit beta-1 OS=Homo sapiens OX=9606 GN=GNB1 PE=1 SV=3	P62873		GBB1	105.26	475.05	450.05	288.03	518.1	478.63
1337	2903	P23258|TBG1_HUMAN	257.5	51170	14	52	Tubulin gamma-1 chain OS=Homo sapiens OX=9606 GN=TUBG1 PE=1 SV=2	P23258		TBG1	252.42	458.96	278.36	600.37	579.62	526.89
1063	1272	O95163|ELP1_HUMAN	269.46	150254	12	18	Elongator complex protein 1 OS=Homo sapiens OX=9606 GN=ELP1 PE=1 SV=3	O95163		ELP1	366.97	361.98	330.98	431.64	407.84	451.1
2249	5729	P22528|SPR1B_HUMAN	154.79	9888	1	44	Cornifin-B OS=Homo sapiens OX=9606 GN=SPRR1B PE=1 SV=2	P22528		SPR1B	1087.65	1045.6	981.71	434.15	481.83	476.92
1606	3223	P18887|XRCC1_HUMAN	208.88	69477	6	15	DNA repair protein XRCC1 OS=Homo sapiens OX=9606 GN=XRCC1 PE=1 SV=2	P18887		XRCC1	257.88	220.57	259.63	488.39	359.11	439.42
1572	5499	Q16563-2|SYPL1_HUMAN	205.79	26412	6	35	Isoform 2 of Synaptophysin-like protein 1 OS=Homo sapiens OX=9606 GN=SYPL1	Q16563	2	SYPL1	563.11	537.04	590.1	452.71	534.19	476.19
1137	1101	Q92922|SMRC1_HUMAN	264.56	122867	11	19	SWI/SNF complex subunit SMARCC1 OS=Homo sapiens OX=9606 GN=SMARCC1 PE=1 SV=3	Q92922		SMRC1	102.35	223.84	155.36	319.54	506.21	469.08
2219	4056	O14964|HGS_HUMAN	194.43	86192	7	14	Hepatocyte growth factor-regulated tyrosine kinase substrate OS=Homo sapiens OX=9606 GN=HGS PE=1 SV=1	O14964		HGS	247.04	284.51	169.87	674.14	487.19	524.78
1186	2991	P00966|ASSY_HUMAN	221.02	46530	11	33	Argininosuccinate synthase OS=Homo sapiens OX=9606 GN=ASS1 PE=1 SV=2	P00966		ASSY	315.31	321	381.11	373.12	397.63	474.49
1759	5343	O94903|PLPHP_HUMAN	186.24	30344	4	23	Pyridoxal phosphate homeostasis protein OS=Homo sapiens OX=9606 GN=PLPBP PE=1 SV=1	O94903		PLPHP	150.01	141.37	212.12	263.24	317.37	401.31
1829	4760	Q00325-2|MPCP_HUMAN	205.5	39959	9	30	Isoform B of Phosphate carrier protein mitochondrial OS=Homo sapiens OX=9606 GN=SLC25A3	Q00325	2	MPCP	271.54	159.1	239.58	518.58	387.71	465.68
1737	3734	Q7Z2T5|TRM1L_HUMAN	187.59	81747	4	9	TRMT1-like protein OS=Homo sapiens OX=9606 GN=TRMT1L PE=1 SV=2	Q7Z2T5		TRM1L	248.96	221.87	207.93	274.21	315.17	381.42
484	3015	P16989-2|YBOX3_HUMAN	333.11	31947	1	53	Isoform 2 of Y-box-binding protein 3 OS=Homo sapiens OX=9606 GN=YBX3	P16989	2	YBOX3	638.51	691.63	11.14	425.49	257.2	455.5
1312	1477	Q9H2U1-3|DHX36_HUMAN	241.46	111479	11	19	Isoform 3 of ATP-dependent DNA/RNA helicase DHX36 OS=Homo sapiens OX=9606 GN=DHX36	Q9H2U1	3	DHX36	330.23	266.48	343.15	450.98	451.48	472.37
2637	8594	Q9NWV4|CZIB_HUMAN	131.54	18048	2	21	CXXC motif containing zinc binding protein OS=Homo sapiens OX=9606 GN=CZIB PE=1 SV=1	Q9NWV4		CZIB	469.72	386.8	369.24	761.36	611.73	589.72
1091	2761	O00170|AIP_HUMAN	242.3	37636	10	44	AH receptor-interacting protein OS=Homo sapiens OX=9606 GN=AIP PE=1 SV=2	O00170		AIP	441.81	804.14	654.12	446.14	501.86	482.39
1322	761	O14974-5|MYPT1_HUMAN	282.12	105641	16	20	Isoform 5 of Protein phosphatase 1 regulatory subunit 12A OS=Homo sapiens OX=9606 GN=PPP1R12A	O14974	5	MYPT1	390.96	273	412.37	469.26	261.43	424.24
1792	2703	Q9NRW7|VPS45_HUMAN	209.46	65077	9	22	Vacuolar protein sorting-associated protein 45 OS=Homo sapiens OX=9606 GN=VPS45 PE=1 SV=1	Q9NRW7		VPS45	308.75	311.11	318.09	486.1	430.71	469.56
1563	4885	Q14696|MESD_HUMAN	220.84	26077	7	30	LRP chaperone MESD OS=Homo sapiens OX=9606 GN=MESD PE=1 SV=2	Q14696		MESD	522.24	641.41	692.67	284	568.02	434.1
1206	3430	Q9Y375|CIA30_HUMAN	209.32	37764	6	25	Complex I intermediate-associated protein 30 mitochondrial OS=Homo sapiens OX=9606 GN=NDUFAF1 PE=1 SV=2	Q9Y375		CIA30	127.65	121.83	177.41	459.39	471.4	466.9
2055	3383	Q8WXF1|PSPC1_HUMAN	199.33	58744	9	20	Paraspeckle component 1 OS=Homo sapiens OX=9606 GN=PSPC1 PE=1 SV=1	Q8WXF1		PSPC1	302.77	246.91	234.28	178.79	319.04	377.38
1321	3900	Q96EE3-1|SEH1_HUMAN	226.64	46578	7	28	Isoform B of Nucleoporin SEH1 OS=Homo sapiens OX=9606 GN=SEH1L	Q96EE3	1	SEH1	397.75	314.1	317.73	368.42	544.06	500.92
1097	1910	P29317|EPHA2_HUMAN	221.39	108266	10	16	Ephrin type-A receptor 2 OS=Homo sapiens OX=9606 GN=EPHA2 PE=1 SV=2	P29317		EPHA2	869.77	1081	694.98	556.25	571.83	490.22
2324	7146	Q13641|TPBG_HUMAN	184.54	46032	5	14	Trophoblast glycoprotein OS=Homo sapiens OX=9606 GN=TPBG PE=1 SV=1	Q13641		TPBG	86.94	97.58	179.62	234.24	270.66	369.55
495	342	Q5K651|SAMD9_HUMAN	371	184280	27	24	Sterile alpha motif domain-containing protein 9 OS=Homo sapiens OX=9606 GN=SAMD9 PE=1 SV=1	Q5K651		SAMD9	2533.75	2135.15	2473	398.95	341.28	439.77
1624	2244	P05556-5|ITB1_HUMAN	227.93	88884	10	24	Isoform 5 of Integrin beta-1 OS=Homo sapiens OX=9606 GN=ITGB1	P05556	5	ITB1	346.71	260.37	52.86	346.84	471.13	464.43
1287	4936	Q9BYD3|RM04_HUMAN	218.02	34919	7	41	39S ribosomal protein L4 mitochondrial OS=Homo sapiens OX=9606 GN=MRPL4 PE=1 SV=1	Q9BYD3		RM04	541.78	108.97	210.11	660.1	948.08	582.63
1733	4862	Q9P287|BCCIP_HUMAN	211.26	35979	5	25	BRCA2 and CDKN1A-interacting protein OS=Homo sapiens OX=9606 GN=BCCIP PE=1 SV=1	Q9P287		BCCIP	423.78	214.15	124.87	364.9	428.4	452.8
2003	1717	P18583-5|SON_HUMAN	198.04	267032	8	6	Isoform D of Protein SON OS=Homo sapiens OX=9606 GN=SON	P18583	5	SON	186.51	138.33	49.44	234.68	340.98	398.06
2428	5238	Q9NRN7|ADPPT_HUMAN	149.93	35776	3	14	L-aminoadipate-semialdehyde dehydrogenase-phosphopantetheinyl transferase OS=Homo sapiens OX=9606 GN=AASDHPPT PE=1 SV=2	Q9NRN7		ADPPT	216.52	191.09	248.74	327.65	192.45	403.08
709	4041	P05161|ISG15_HUMAN	283.01	17888	9	50	Ubiquitin-like protein ISG15 OS=Homo sapiens OX=9606 GN=ISG15 PE=1 SV=5	P05161		ISG15	5081.25	5942.9	5167.75	803.44	716.59	610.47
2796	12515	Q8N357|S35F6_HUMAN	115.52	40214	2	11	Solute carrier family 35 member F6 OS=Homo sapiens OX=9606 GN=SLC35F6 PE=1 SV=1	Q8N357		S35F6	363.82	361.34	463.32	514.27	228.17	462.39
1473	2312	P35611-2|ADDA_HUMAN	231.52	69985	9	26	Isoform 2 of Alpha-adducin OS=Homo sapiens OX=9606 GN=ADD1	P35611	2	ADDA	216.93	147.54	229.95	555.38	474.13	461.92
1295	1889	Q9UNX4|WDR3_HUMAN	247.82	106099	12	19	WD repeat-containing protein 3 OS=Homo sapiens OX=9606 GN=WDR3 PE=1 SV=1	Q9UNX4		WDR3	280.95	346.1	198.15	480.64	496.93	461.65
617	632	Q7Z406-2|MYH14_HUMAN	293.79	232009	9	11	Isoform 2 of Myosin-14 OS=Homo sapiens OX=9606 GN=MYH14	Q7Z406	2	MYH14	212.6	236.4	317.69	456.2	404.95	451.39
2195	6173	O00743|PPP6_HUMAN	135.09	35144	3	11	Serine/threonine-protein phosphatase 6 catalytic subunit OS=Homo sapiens OX=9606 GN=PPP6C PE=1 SV=1	O00743		PPP6	356.57	409.77	329.01	355.7	315.54	409.84
1587	3486	Q96RS6|NUDC1_HUMAN	213.66	66756	7	21	NudC domain-containing protein 1 OS=Homo sapiens OX=9606 GN=NUDCD1 PE=1 SV=2	Q96RS6		NUDC1	442.96	429.32	303.56	424.97	562.89	460.43
3041	10441	Q9UK76-2|JUPI1_HUMAN	98.94	19916	2	22	Isoform 2 of Jupiter microtubule associated homolog 1 OS=Homo sapiens OX=9606 GN=JPT1	Q9UK76	2	JUPI1	251.79	260.96	338.04	209.84	271.82	439.92
1469	3059	P49753|ACOT2_HUMAN	232.27	53219	7	26	Acyl-coenzyme A thioesterase 2 mitochondrial OS=Homo sapiens OX=9606 GN=ACOT2 PE=1 SV=6	P49753		ACOT2	321.11	350.83	211.13	637.96	427.33	475.28
1978	3061	Q15067-2|ACOX1_HUMAN	217.9	74668	7	20	Isoform 2 of Peroxisomal acyl-coenzyme A oxidase 1 OS=Homo sapiens OX=9606 GN=ACOX1	Q15067	2	ACOX1	161.6	330.11	424.23	465.05	99.92	459.4
798	1419	Q13547|HDAC1_HUMAN	284.17	55103	10	41	Histone deacetylase 1 OS=Homo sapiens OX=9606 GN=HDAC1 PE=1 SV=1	Q13547		HDAC1	485.79	373.37	364.21	757.73	578.36	555.17
1957	7128	Q13445|TMED1_HUMAN	156.56	25206	4	18	Transmembrane emp24 domain-containing protein 1 OS=Homo sapiens OX=9606 GN=TMED1 PE=1 SV=1	Q13445		TMED1	254.61	77.97	381.35	332.9	503.59	471.18
1276	4614	O60256-4|KPRB_HUMAN	224.64	31322	5	35	Isoform 4 of Phosphoribosyl pyrophosphate synthase-associated protein 2 OS=Homo sapiens OX=9606 GN=PRPSAP2	O60256	4	KPRB	272.1	389.17	90.83	411.86	313.84	452.46
2248	6309	O96000|NDUBA_HUMAN	173.89	20777	5	33	NADH dehydrogenase [ubiquinone] 1 beta subcomplex subunit 10 OS=Homo sapiens OX=9606 GN=NDUFB10 PE=1 SV=3	O96000		NDUBA	106.04	109.58	128.08	348.99	376.19	408.14
2303	14333	Q9Y2V2|CHSP1_HUMAN	109.18	15892	1	11	Calcium-regulated heat-stable protein 1 OS=Homo sapiens OX=9606 GN=CARHSP1 PE=1 SV=2	Q9Y2V2		CHSP1	325.64	348.53	352.86	476.79	450.99	458.9
2145	11370	Q6UW68|TM205_HUMAN	144.03	21198	2	17	Transmembrane protein 205 OS=Homo sapiens OX=9606 GN=TMEM205 PE=1 SV=1	Q6UW68		TM205	457.36	431.46	471.41	504.92	462.75	459.41
3356	29679	P62316-2|SMD2_HUMAN	90.11	12399	1	9	Isoform 2 of Small nuclear ribonucleoprotein Sm D2 OS=Homo sapiens OX=9606 GN=SNRPD2	P62316	2	SMD2	319.83	472.81	368.29	363.33	169.85	398.82
1159	2438	Q9Y6E0|STK24_HUMAN	261.11	49308	6	30	Serine/threonine-protein kinase 24 OS=Homo sapiens OX=9606 GN=STK24 PE=1 SV=1	Q9Y6E0		STK24	415.26	336.32	344.87	368.16	354.96	409.16
1411	2820	Q9NR12-2|PDLI7_HUMAN	222.42	46510	6	22	Isoform 2 of PDZ and LIM domain protein 7 OS=Homo sapiens OX=9606 GN=PDLIM7	Q9NR12	2	PDLI7	955.82	649.41	856.42	297.78	349.17	399.55
498	1352	P15170-2|ERF3A_HUMAN	273.98	68601	8	38	Isoform 2 of Eukaryotic peptide chain release factor GTP-binding subunit ERF3A OS=Homo sapiens OX=9606 GN=GSPT1	P15170	2	ERF3A	572.44	481.99	611.41	510.26	438.77	452.41
3088	12159	P07919|QCR6_HUMAN	125.55	10739	2	30	Cytochrome b-c1 complex subunit 6 mitochondrial OS=Homo sapiens OX=9606 GN=UQCRH PE=1 SV=2	P07919		QCR6	191.19	193.02	196.83	444.04	466.22	452.36
641	1489	P17812|PYRG1_HUMAN	301.51	66690	6	40	CTP synthase 1 OS=Homo sapiens OX=9606 GN=CTPS1 PE=1 SV=2	P17812		PYRG1	513.25	340.98	387.37	373.88	456.26	429.96
2357	6254	Q9NT62-2|ATG3_HUMAN	140.42	35467	3	15	Isoform 2 of Ubiquitin-like-conjugating enzyme ATG3 OS=Homo sapiens OX=9606 GN=ATG3	Q9NT62	2	ATG3	157.52	25.15	85.81	148.59	375.77	394.89
3093	14464	Q9P0S9|TM14C_HUMAN	113.38	11565	2	24	Transmembrane protein 14C OS=Homo sapiens OX=9606 GN=TMEM14C PE=1 SV=1	Q9P0S9		TM14C	112	0	47.14	151.84	259	352.51
1648	4478	P61086|UBE2K_HUMAN	218.33	22407	7	42	Ubiquitin-conjugating enzyme E2 K OS=Homo sapiens OX=9606 GN=UBE2K PE=1 SV=3	P61086		UBE2K	273.81	260.51	210.48	148.07	444.36	442.56
1765	4248	P00568|KAD1_HUMAN	259.39	21635	6	40	Adenylate kinase isoenzyme 1 OS=Homo sapiens OX=9606 GN=AK1 PE=1 SV=3	P00568		KAD1	267.22	470.81	435.52	473.76	386.31	449.58
2066	7671	O75607|NPM3_HUMAN	188.86	19344	3	32	Nucleoplasmin-3 OS=Homo sapiens OX=9606 GN=NPM3 PE=1 SV=3	O75607		NPM3	279.09	392.76	331.12	509.8	406.61	448.96
1208	1260	Q14C86-5|GAPD1_HUMAN	263.12	162230	14	15	Isoform 5 of GTPase-activating protein and VPS9 domain-containing protein 1 OS=Homo sapiens OX=9606 GN=GAPVD1	Q14C86	5	GAPD1	556.77	466.05	565.4	454.58	403.87	448.96
1410	2396	Q9H3P7|GCP60_HUMAN	235.45	60593	9	27	Golgi resident protein GCP60 OS=Homo sapiens OX=9606 GN=ACBD3 PE=1 SV=4	Q9H3P7		GCP60	414.02	433.39	413.06	405.07	354.93	446.51
2881	13108	O75635-2|SPB7_HUMAN	74.34	41174	1	3	Isoform 2 of Serpin B7 OS=Homo sapiens OX=9606 GN=SERPINB7	O75635	2	SPB7	374.09	285.23	337.71	399.97	401.85	426.63
1778	3335	Q9UBP6|TRMB_HUMAN	215.83	31471	6	38	tRNA (guanine-N(7)-)-methyltransferase OS=Homo sapiens OX=9606 GN=METTL1 PE=1 SV=1	Q9UBP6		TRMB	285.46	245.27	168.26	420.53	107.25	433.83
1431	6051	Q9UL26|RB22A_HUMAN	172.31	21855	4	28	Ras-related protein Rab-22A OS=Homo sapiens OX=9606 GN=RAB22A PE=1 SV=2	Q9UL26		RB22A	407.06	614.78	447.26	548.79	465.46	476.51
1207	5184	P15153|RAC2_HUMAN	199.38	21429	4	36	Ras-related C3 botulinum toxin substrate 2 OS=Homo sapiens OX=9606 GN=RAC2 PE=1 SV=1	P15153		RAC2	281.62	413.31	396.39	424.93	445.95	446.49
1393	2355	Q7L2J0|MEPCE_HUMAN	245.59	74355	8	24	7SK snRNA methylphosphate capping enzyme OS=Homo sapiens OX=9606 GN=MEPCE PE=1 SV=1	Q7L2J0		MEPCE	279.54	214.23	273.23	344.71	282.65	390.73
4095	10611	Q9NQP4|PFD4_HUMAN	88.03	15314	2	17	Prefoldin subunit 4 OS=Homo sapiens OX=9606 GN=PFDN4 PE=1 SV=1	Q9NQP4		PFD4	0	53.88	0	293.85	190.27	371.94
1382	1154	P07942|LAMB1_HUMAN	252.02	198037	12	8	Laminin subunit beta-1 OS=Homo sapiens OX=9606 GN=LAMB1 PE=1 SV=2	P07942		LAMB1	296.8	359.26	133.48	398.36	515.01	459.62
551	1462	P62140|PP1B_HUMAN	298.38	37187	4	55	Serine/threonine-protein phosphatase PP1-beta catalytic subunit OS=Homo sapiens OX=9606 GN=PPP1CB PE=1 SV=3	P62140		PP1B	220.51	177.49	396.86	417.85	260.17	419.47
1447	3775	Q9Y316|MEMO1_HUMAN	247.49	33733	10	58	Protein MEMO1 OS=Homo sapiens OX=9606 GN=MEMO1 PE=1 SV=1	Q9Y316		MEMO1	523.68	325.44	238.63	492.71	496.87	447.59
1293	1637	Q9UIA9|XPO7_HUMAN	260.15	123907	14	20	Exportin-7 OS=Homo sapiens OX=9606 GN=XPO7 PE=1 SV=3	Q9UIA9		XPO7	341.79	293.37	258.59	346.08	339.12	389.95
1010	2957	P61163|ACTZ_HUMAN	240.72	42614	4	39	Alpha-centractin OS=Homo sapiens OX=9606 GN=ACTR1A PE=1 SV=1	P61163		ACTZ	264.97	376.47	475.86	445.88	385.98	440.62
1236	1466	Q9UJS0|CMC2_HUMAN	264.82	74176	11	33	Calcium-binding mitochondrial carrier protein Aralar2 OS=Homo sapiens OX=9606 GN=SLC25A13 PE=1 SV=2	Q9UJS0		CMC2	241.13	214.85	173.61	315.41	322.22	380.37
2230	7331	O15212|PFD6_HUMAN	135.31	14583	4	38	Prefoldin subunit 6 OS=Homo sapiens OX=9606 GN=PFDN6 PE=1 SV=1	O15212		PFD6	195.87	243.83	194.22	310.05	385.3	405.67
1649	4075	P25325-2|THTM_HUMAN	236.98	35250	8	39	Isoform 2 of 3-mercaptopyruvate sulfurtransferase OS=Homo sapiens OX=9606 GN=MPST	P25325	2	THTM	394.52	436.72	403.15	525.44	469.71	441.83
1740	6833	Q00403|TF2B_HUMAN	172.63	34833	3	10	Transcription initiation factor IIB OS=Homo sapiens OX=9606 GN=GTF2B PE=1 SV=1	Q00403		TF2B	259.99	160.76	263.82	290.63	340.6	387.89
1385	2362	Q9P206-2|K1522_HUMAN	254.34	113062	10	14	Isoform 2 of Uncharacterized protein KIAA1522 OS=Homo sapiens OX=9606 GN=KIAA1522	Q9P206	2	K1522	221.5	271.81	435.68	505.25	424.13	436.93
1499	5319	P15151|PVR_HUMAN	176.41	45303	4	14	Poliovirus receptor OS=Homo sapiens OX=9606 GN=PVR PE=1 SV=2	P15151		PVR	503.75	652.99	503.08	463.77	433.81	436.07
1327	984	Q13136|LIPA1_HUMAN	250.92	135778	13	15	Liprin-alpha-1 OS=Homo sapiens OX=9606 GN=PPFIA1 PE=1 SV=1	Q13136		LIPA1	373.15	309.73	347.24	550.63	384.11	435.66
2841	6890	Q86V81|THOC4_HUMAN	179.85	26888	5	34	THO complex subunit 4 OS=Homo sapiens OX=9606 GN=ALYREF PE=1 SV=3	Q86V81		THOC4	399.69	384.58	305.95	453.49	415.31	443.2
927	1849	P28482|MK01_HUMAN	281.02	41390	9	56	Mitogen-activated protein kinase 1 OS=Homo sapiens OX=9606 GN=MAPK1 PE=1 SV=3	P28482		MK01	236.58	163.9	351.2	498.77	351.19	449.87
2354	6015	P07108-3|ACBP_HUMAN	139.62	10145	4	53	Isoform 3 of Acyl-CoA-binding protein OS=Homo sapiens OX=9606 GN=DBI	P07108	3	ACBP	261.21	199.8	238.69	516.18	613.14	466.89
1071	3329	Q69YN2|C19L1_HUMAN	245.42	60619	8	30	CWF19-like protein 1 OS=Homo sapiens OX=9606 GN=CWF19L1 PE=1 SV=2	Q69YN2		C19L1	323.23	265.59	314.99	394.71	394.72	432.74
3205	5019	O96013|PAK4_HUMAN	93.06	64072	2	4	Serine/threonine-protein kinase PAK 4 OS=Homo sapiens OX=9606 GN=PAK4 PE=1 SV=1	O96013		PAK4	0	0	0	209.55	276.49	372.72
650	2428	P11908|PRPS2_HUMAN	275.18	34769	2	40	Ribose-phosphate pyrophosphokinase 2 OS=Homo sapiens OX=9606 GN=PRPS2 PE=1 SV=2	P11908		PRPS2	305.59	328.04	279.35	383.81	336.46	405.83
1423	2250	Q13123|RED_HUMAN	229.87	65602	9	25	Protein Red OS=Homo sapiens OX=9606 GN=IK PE=1 SV=3	Q13123		RED	330.23	330.05	395.98	433.68	347.85	403.72
1136	528	Q13751|LAMB3_HUMAN	303.46	129572	15	21	Laminin subunit beta-3 OS=Homo sapiens OX=9606 GN=LAMB3 PE=1 SV=1	Q13751		LAMB3	1499.5	1122.3	1197.7	271.22	163.56	317.5
1335	2831	P52788|SPSY_HUMAN	233.61	41268	8	41	Spermine synthase OS=Homo sapiens OX=9606 GN=SMS PE=1 SV=2	P52788		SPSY	424.88	434.7	218.88	243	448.56	340.67
1906	5400	P04179|SODM_HUMAN	245.99	24750	7	41	Superoxide dismutase [Mn] mitochondrial OS=Homo sapiens OX=9606 GN=SOD2 PE=1 SV=3	P04179		SODM	297.09	301.23	338.58	382.98	349.93	409.33
1112	3033	Q8NE86|MCU_HUMAN	222.17	39867	6	25	Calcium uniporter protein mitochondrial OS=Homo sapiens OX=9606 GN=MCU PE=1 SV=1	Q8NE86		MCU	316.83	241.83	274.85	380.41	330.46	428.56
1109	1822	O76094-2|SRP72_HUMAN	277.52	67880	11	24	Isoform 2 of Signal recognition particle subunit SRP72 OS=Homo sapiens OX=9606 GN=SRP72	O76094	2	SRP72	632.39	511.52	517.5	420.06	243.31	384.7
1551	2715	Q9UKM7|MA1B1_HUMAN	219.94	79580	8	19	Endoplasmic reticulum mannosyl-oligosaccharide 1 2-alpha-mannosidase OS=Homo sapiens OX=9606 GN=MAN1B1 PE=1 SV=2	Q9UKM7		MA1B1	149.27	93.63	178.61	471.5	355.41	427.48
2041	2739	Q02543|RL18A_HUMAN	160.45	20762	7	38	60S ribosomal protein L18a OS=Homo sapiens OX=9606 GN=RPL18A PE=1 SV=2	Q02543		RL18A	559.42	216.48	315.62	592.03	204.17	427.31
2625	12816	Q99643|C560_HUMAN	116.2	18610	2	12	Succinate dehydrogenase cytochrome b560 subunit mitochondrial OS=Homo sapiens OX=9606 GN=SDHC PE=1 SV=1	Q99643		C560	374.72	328.33	275.03	456.05	428.76	437.79
2226	5069	P49366|DHYS_HUMAN	202.12	40971	5	25	Deoxyhypusine synthase OS=Homo sapiens OX=9606 GN=DHPS PE=1 SV=1	P49366		DHYS	300.22	143.33	249.79	236.6	269.16	360.38
48	474	P68366-2|TBA4A_HUMAN	409.7	48329	4	81	Isoform 2 of Tubulin alpha-4A chain OS=Homo sapiens OX=9606 GN=TUBA4A	P68366	2	TBA4A	590.32	890.31	414	893.95	468.86	478.39
1498	6414	Q9BRT6|LLPH_HUMAN	173.76	15225	4	40	Protein LLP homolog OS=Homo sapiens OX=9606 GN=LLPH PE=1 SV=1	Q9BRT6		LLPH	418.09	425.05	353.38	299.52	262.9	363.13
1004	2477	P62879|GBB2_HUMAN	258.52	37331	6	52	Guanine nucleotide-binding protein G(I)/G(S)/G(T) subunit beta-2 OS=Homo sapiens OX=9606 GN=GNB2 PE=1 SV=3	P62879		GBB2	478.33	243.46	360.98	300.81	385.81	363.94
1837	5298	Q7Z4G4-2|TRM11_HUMAN	184.25	52789	4	16	Isoform 2 of tRNA (guanine(10)-N2)-methyltransferase homolog OS=Homo sapiens OX=9606 GN=TRMT11	Q7Z4G4	2	TRM11	458.02	425.81	269.75	422.17	451	419.32
2011	3931	Q8WVX9|FACR1_HUMAN	204.55	59357	5	15	Fatty acyl-CoA reductase 1 OS=Homo sapiens OX=9606 GN=FAR1 PE=1 SV=1	Q8WVX9		FACR1	650.93	513.7	679.57	534.13	413.27	422.39
1830	2175	Q9Y2S7|PDIP2_HUMAN	229.39	42033	8	27	Polymerase delta-interacting protein 2 OS=Homo sapiens OX=9606 GN=POLDIP2 PE=1 SV=1	Q9Y2S7		PDIP2	188.51	94.09	105.99	248	336.39	376.74
1808	5217	P21912|SDHB_HUMAN	178.47	31630	5	19	Succinate dehydrogenase [ubiquinone] iron-sulfur subunit mitochondrial OS=Homo sapiens OX=9606 GN=SDHB PE=1 SV=3	P21912		SDHB	129.85	180.03	180.67	322.99	344.83	415.22
1758	4488	O75884|RBBP9_HUMAN	233.79	21000	7	66	Serine hydrolase RBBP9 OS=Homo sapiens OX=9606 GN=RBBP9 PE=1 SV=2	O75884		RBBP9	199.05	689.14	369.97	826.69	293.03	418.11
2243	5153	Q92665|RT31_HUMAN	179.31	45319	6	18	28S ribosomal protein S31 mitochondrial OS=Homo sapiens OX=9606 GN=MRPS31 PE=1 SV=3	Q92665		RT31	210.65	126.68	100.04	176.76	431.93	408.46
1716	4780	Q9UNS2|CSN3_HUMAN	219.87	47873	8	34	COP9 signalosome complex subunit 3 OS=Homo sapiens OX=9606 GN=COPS3 PE=1 SV=3	Q9UNS2		CSN3	385.21	380.59	351.69	398.9	393.68	406.29
1314	2291	P53992|SC24C_HUMAN	252.48	118325	8	14	Protein transport protein Sec24C OS=Homo sapiens OX=9606 GN=SEC24C PE=1 SV=3	P53992		SC24C	385.46	241.61	258.3	288.46	422.44	356.77
1972	4784	Q9H7B2|RPF2_HUMAN	190	35583	6	30	Ribosome production factor 2 homolog OS=Homo sapiens OX=9606 GN=RPF2 PE=1 SV=2	Q9H7B2		RPF2	245.83	177.48	190	147	282.72	307.58
1821	4093	Q9NXG2|THUM1_HUMAN	208.02	39315	6	25	THUMP domain-containing protein 1 OS=Homo sapiens OX=9606 GN=THUMPD1 PE=1 SV=2	Q9NXG2		THUM1	288.37	401.86	413.38	359.96	241.92	386.35
1868	5328	Q9H488|OFUT1_HUMAN	205.6	43956	6	30	GDP-fucose protein O-fucosyltransferase 1 OS=Homo sapiens OX=9606 GN=POFUT1 PE=1 SV=1	Q9H488		OFUT1	317.01	341.87	305.75	315.52	342.61	369
1690	6659	P24390|ERD21_HUMAN	163.56	24542	2	22	ER lumen protein-retaining receptor 1 OS=Homo sapiens OX=9606 GN=KDELR1 PE=1 SV=1	P24390		ERD21	251.74	661.85	411.77	696.76	500.89	488.57
1569	5168	P61006|RAB8A_HUMAN	208.66	23668	4	31	Ras-related protein Rab-8A OS=Homo sapiens OX=9606 GN=RAB8A PE=1 SV=1	P61006		RAB8A	629.98	533.57	370.1	385.25	109.51	358.01
2086	17815	Q15800|MSMO1_HUMAN	132.91	35216	2	10	Methylsterol monooxygenase 1 OS=Homo sapiens OX=9606 GN=MSMO1 PE=1 SV=1	Q15800		MSMO1	101.63	214.42	231.69	908.83	513.62	485.5
1508	3649	Q13363|CTBP1_HUMAN	208.55	47535	5	23	C-terminal-binding protein 1 OS=Homo sapiens OX=9606 GN=CTBP1 PE=1 SV=2	Q13363		CTBP1	355.29	420.36	381.52	522.98	427.85	426.14
1313	1700	Q99959-2|PKP2_HUMAN	250.56	92756	11	18	Isoform 1 of Plakophilin-2 OS=Homo sapiens OX=9606 GN=PKP2	Q99959	2	PKP2	343.76	265.07	419.33	520.72	364.34	452.38
2103	13363	Q9H3K6|BOLA2_HUMAN	152.68	10117	2	41	BolA-like protein 2 OS=Homo sapiens OX=9606 GN=BOLA2 PE=1 SV=1	Q9H3K6		BOLA2	334.17	400.69	387.4	337.46	353.29	380.7
1956	7078	Q99470|SDF2_HUMAN	188.11	23026	3	25	Stromal cell-derived factor 2 OS=Homo sapiens OX=9606 GN=SDF2 PE=1 SV=2	Q99470		SDF2	222.88	295.22	310.21	276.44	165.93	299.12
426	1075	P62136|PP1A_HUMAN	308.92	37512	8	72	Serine/threonine-protein phosphatase PP1-alpha catalytic subunit OS=Homo sapiens OX=9606 GN=PPP1CA PE=1 SV=1	P62136		PP1A	535.45	305.64	452.3	669.54	904.64	557.48
2139	5971	O00186|STXB3_HUMAN	182.67	67764	4	10	Syntaxin-binding protein 3 OS=Homo sapiens OX=9606 GN=STXBP3 PE=1 SV=2	O00186		STXB3	154.91	144.49	629.77	385.29	248.83	392.11
1842	1829	Q9H3U1-2|UN45A_HUMAN	221.77	101675	9	14	Isoform 2 of Protein unc-45 homolog A OS=Homo sapiens OX=9606 GN=UNC45A	Q9H3U1	2	UN45A	345.04	491.46	458.42	453.87	426.78	423.38
1693	1668	O14936-3|CSKP_HUMAN	276.74	102114	11	17	Isoform 3 of Peripheral plasma membrane protein CASK OS=Homo sapiens OX=9606 GN=CASK	O14936	3	CSKP	225.33	159.52	147.44	329.66	287.15	353.36
1532	3506	Q52LJ0|FA98B_HUMAN	187.84	45547	6	27	Protein FAM98B OS=Homo sapiens OX=9606 GN=FAM98B PE=1 SV=2	Q52LJ0		FA98B	670.5	383.75	369.04	425.52	275.3	345.92
2436	6983	Q6IAA8|LTOR1_HUMAN	148.78	17745	4	33	Ragulator complex protein LAMTOR1 OS=Homo sapiens OX=9606 GN=LAMTOR1 PE=1 SV=2	Q6IAA8		LTOR1	298.39	287.59	307.31	423.1	343.39	407.48
1797	4190	Q16850|CP51A_HUMAN	192.88	56806	5	17	Lanosterol 14-alpha demethylase OS=Homo sapiens OX=9606 GN=CYP51A1 PE=1 SV=3	Q16850		CP51A	841.77	501.05	117.15	560.85	184.21	353.65
1512	14228	Q8NFJ5|RAI3_HUMAN	163.5	40251	3	10	Retinoic acid-induced protein 3 OS=Homo sapiens OX=9606 GN=GPRC5A PE=1 SV=2	Q8NFJ5		RAI3	552.25	470.94	504.15	417.5	400.94	406.32
1801	2927	Q9HCD5|NCOA5_HUMAN	186.52	65536	6	14	Nuclear receptor coactivator 5 OS=Homo sapiens OX=9606 GN=NCOA5 PE=1 SV=2	Q9HCD5		NCOA5	266.29	74.88	178.44	216.14	326.88	362.86
1875	6923	O43169|CYB5B_HUMAN	149.27	16695	3	21	Cytochrome b5 type B OS=Homo sapiens OX=9606 GN=CYB5B PE=1 SV=3	O43169		CYB5B	330.81	264.03	252.7	328.03	449.29	423.52
1368	2685	P51114-3|FXR1_HUMAN	214.63	59920	8	20	Isoform 3 of Fragile X mental retardation syndrome-related protein 1 OS=Homo sapiens OX=9606 GN=FXR1	P51114	3	FXR1	420.15	338.69	270.28	439.8	376.15	396.74
1713	4461	Q92905|CSN5_HUMAN	222.52	37579	7	31	COP9 signalosome complex subunit 5 OS=Homo sapiens OX=9606 GN=COPS5 PE=1 SV=4	Q92905		CSN5	383.29	394.96	386.18	388.72	397.85	405.29
1848	2673	Q9Y697-2|NFS1_HUMAN	211.83	44017	6	22	Isoform Cytoplasmic of Cysteine desulfurase mitochondrial OS=Homo sapiens OX=9606 GN=NFS1	Q9Y697	2	NFS1	209.69	128.4	96.83	414.77	330.13	400.59
1774	2307	Q8IZL8|PELP1_HUMAN	254.54	119700	12	18	Proline- glutamic acid- and leucine-rich protein 1 OS=Homo sapiens OX=9606 GN=PELP1 PE=1 SV=2	Q8IZL8		PELP1	216.13	217.31	288.3	348.97	291.32	373.06
1110	1894	Q7Z5L9-2|I2BP2_HUMAN	270.38	59481	8	29	Isoform 2 of Interferon regulatory factor 2-binding protein 2 OS=Homo sapiens OX=9606 GN=IRF2BP2	Q7Z5L9	2	I2BP2	885.71	746.47	1007.3	566.14	439.86	458.77
854	1756	Q8WWM7-6|ATX2L_HUMAN	304.7	102895	11	15	Isoform 6 of Ataxin-2-like protein OS=Homo sapiens OX=9606 GN=ATXN2L	Q8WWM7	6	ATX2L	820.51	1239.75	1501.35	866.9	1282.8	799.37
1885	5219	Q9P2R7-2|SUCB1_HUMAN	213	48040	4	23	Isoform 2 of Succinate--CoA ligase [ADP-forming] subunit beta mitochondrial OS=Homo sapiens OX=9606 GN=SUCLA2	Q9P2R7	2	SUCB1	260.61	304.01	292.66	419.07	414.5	403.85
2527	5802	O43674|NDUB5_HUMAN	142.23	21750	3	23	NADH dehydrogenase [ubiquinone] 1 beta subcomplex subunit 5 mitochondrial OS=Homo sapiens OX=9606 GN=NDUFB5 PE=1 SV=1	O43674		NDUB5	119.18	126.37	111.49	293.47	366.3	395.62
1444	2097	O75717|WDHD1_HUMAN	250.1	125967	10	14	WD repeat and HMG-box DNA-binding protein 1 OS=Homo sapiens OX=9606 GN=WDHD1 PE=1 SV=1	O75717		WDHD1	150.65	43.58	93.16	329.77	332.2	368.69
1454	1592	Q05397-7|FAK1_HUMAN	246.5	114253	10	18	Isoform 7 of Focal adhesion kinase 1 OS=Homo sapiens OX=9606 GN=PTK2	Q05397	7	FAK1	287.1	330.51	315.07	345.54	407.3	402.77
1639	1899	Q9UIQ6-2|LCAP_HUMAN	224.17	115636	10	17	Isoform 2 of Leucyl-cystinyl aminopeptidase OS=Homo sapiens OX=9606 GN=LNPEP	Q9UIQ6	2	LCAP	365.07	359.79	372.65	449.31	366.3	401.88
78	5281	Q58FG1|HS904_HUMAN	186.18	47712	1	9	Putative heat shock protein HSP 90-alpha A4 OS=Homo sapiens OX=9606 GN=HSP90AA4P PE=5 SV=1	Q58FG1		HS904	453.44	406.22	467.43	403.27	319.78	363.54
2001	6439	O00161|SNP23_HUMAN	186.79	23354	5	28	Synaptosomal-associated protein 23 OS=Homo sapiens OX=9606 GN=SNAP23 PE=1 SV=1	O00161		SNP23	232.86	182.28	193.57	399.99	398.39	401.04
1230	7097	Q99720|SGMR1_HUMAN	175.37	25128	4	43	Sigma non-opioid intracellular receptor 1 OS=Homo sapiens OX=9606 GN=SIGMAR1 PE=1 SV=1	Q99720		SGMR1	537.9	1698.95	914.9	1350.35	627.59	535.29
2247	5082	Q00059|TFAM_HUMAN	157.47	29097	4	22	Transcription factor A mitochondrial OS=Homo sapiens OX=9606 GN=TFAM PE=1 SV=1	Q00059		TFAM	174.19	174.98	233.27	400.78	418.57	405.79
1463	2063	O43395|PRPF3_HUMAN	230.95	77529	10	24	U4/U6 small nuclear ribonucleoprotein Prp3 OS=Homo sapiens OX=9606 GN=PRPF3 PE=1 SV=2	O43395		PRPF3	321.57	283.97	289.96	307.09	395.94	387.73
1380	3126	Q6PIU2|NCEH1_HUMAN	226.5	45808	9	33	Neutral cholesterol ester hydrolase 1 OS=Homo sapiens OX=9606 GN=NCEH1 PE=1 SV=3	Q6PIU2		NCEH1	585.96	474.46	443.93	423.88	687.85	440.04
1785	6321	Q9GZS3|WDR61_HUMAN	180.96	33581	4	20	WD repeat-containing protein 61 OS=Homo sapiens OX=9606 GN=WDR61 PE=1 SV=1	Q9GZS3		WDR61	237.14	262.17	267.01	470.96	446.87	418.88
2646	8993	P51151|RAB9A_HUMAN	133.99	22838	2	15	Ras-related protein Rab-9A OS=Homo sapiens OX=9606 GN=RAB9A PE=1 SV=1	P51151		RAB9A	62.06	55.26	275.44	145.66	72.82	269.79
1441	1563	Q8TEQ6|GEMI5_HUMAN	262.08	168589	12	13	Gem-associated protein 5 OS=Homo sapiens OX=9606 GN=GEMIN5 PE=1 SV=3	Q8TEQ6		GEMI5	255.6	537.25	402.06	514.45	361.91	396.83
1252	2327	Q96P70|IPO9_HUMAN	291.01	115963	12	18	Importin-9 OS=Homo sapiens OX=9606 GN=IPO9 PE=1 SV=3	Q96P70		IPO9	474.53	681.36	517	667.47	491.6	430.68
1926	6074	Q8NFH4|NUP37_HUMAN	207.45	36708	4	19	Nucleoporin Nup37 OS=Homo sapiens OX=9606 GN=NUP37 PE=1 SV=1	Q8NFH4		NUP37	322.08	321.21	344.1	363.63	406.72	394.84
1489	1515	Q9NVE7|PANK4_HUMAN	266.97	85991	10	18	4'-phosphopantetheine phosphatase OS=Homo sapiens OX=9606 GN=PANK4 PE=1 SV=1	Q9NVE7		PANK4	369.1	313.15	437.06	454.39	472.53	419.64
1634	3750	Q9BW27-3|NUP85_HUMAN	222.76	69800	7	19	Isoform 3 of Nuclear pore complex protein Nup85 OS=Homo sapiens OX=9606 GN=NUP85	Q9BW27	3	NUP85	246.8	286.38	293.92	363.67	310.59	364.55
1631	2833	Q9NVM9|INT13_HUMAN	226.13	80225	8	16	Integrator complex subunit 13 OS=Homo sapiens OX=9606 GN=INTS13 PE=1 SV=2	Q9NVM9		INT13	209.77	159.88	151.33	451.68	393.46	405.14
3033	8063	Q9C0E8|LNP_HUMAN	147.97	47740	3	9	Endoplasmic reticulum junction formation protein lunapark OS=Homo sapiens OX=9606 GN=LNPK PE=1 SV=2	Q9C0E8		LNP	173.1	251.81	312.15	359.58	327.45	380.43
2453	4616	Q9BZE1|RM37_HUMAN	200.78	48118	5	22	39S ribosomal protein L37 mitochondrial OS=Homo sapiens OX=9606 GN=MRPL37 PE=1 SV=2	Q9BZE1		RM37	138.29	152.42	143.61	272.81	395.91	392.03
2037	9940	Q9NP79|VTA1_HUMAN	187.41	33879	4	23	Vacuolar protein sorting-associated protein VTA1 homolog OS=Homo sapiens OX=9606 GN=VTA1 PE=1 SV=1	Q9NP79		VTA1	337.82	212.18	297.52	376.89	373.91	392.01
1586	3157	Q9Y6B6|SAR1B_HUMAN	215.31	22410	5	67	GTP-binding protein SAR1b OS=Homo sapiens OX=9606 GN=SAR1B PE=1 SV=1	Q9Y6B6		SAR1B	112.59	15.02	160.33	365.09	50.52	376.63
1477	2115	Q9P260|RELCH_HUMAN	236.18	134630	13	18	RAB11-binding protein RELCH OS=Homo sapiens OX=9606 GN=RELCH PE=1 SV=2	Q9P260		RELCH	281.36	299.17	166.72	310.99	231.31	334.31
1332	1232	Q7Z460-3|CLAP1_HUMAN	280.59	164565	11	14	Isoform 3 of CLIP-associating protein 1 OS=Homo sapiens OX=9606 GN=CLASP1	Q7Z460	3	CLAP1	225.4	194.08	161.83	270.23	259.66	326.94
3924	10340	Q9HB40|RISC_HUMAN	79.66	50831	1	3	Retinoid-inducible serine carboxypeptidase OS=Homo sapiens OX=9606 GN=SCPEP1 PE=1 SV=1	Q9HB40		RISC	0	0	0	0	0	195.07
1715	3988	Q9NY93-2|DDX56_HUMAN	176.34	57275	5	15	Isoform 2 of Probable ATP-dependent RNA helicase DDX56 OS=Homo sapiens OX=9606 GN=DDX56	Q9NY93	2	DDX56	264.93	68.89	141.17	349.51	346.45	381.07
2267	3941	Q9UKG1|DP13A_HUMAN	186.3	79664	6	15	DCC-interacting protein 13-alpha OS=Homo sapiens OX=9606 GN=APPL1 PE=1 SV=1	Q9UKG1		DP13A	340.78	209.5	235.9	344.78	52.93	355.26
2096	3174	O95299|NDUAA_HUMAN	209.63	40751	6	28	NADH dehydrogenase [ubiquinone] 1 alpha subcomplex subunit 10 mitochondrial OS=Homo sapiens OX=9606 GN=NDUFA10 PE=1 SV=1	O95299		NDUAA	0	0	0	366.41	362.03	388.09
1456	3638	P51003|PAPOA_HUMAN	212.93	82843	7	15	Poly(A) polymerase alpha OS=Homo sapiens OX=9606 GN=PAPOLA PE=1 SV=4	P51003		PAPOA	235.48	264.1	229.5	357.43	400.67	385.9
2310	3036	Q13618|CUL3_HUMAN	209.66	88930	9	17	Cullin-3 OS=Homo sapiens OX=9606 GN=CUL3 PE=1 SV=2	Q13618		CUL3	61.66	76.9	62.01	204.24	105.62	275.35
1755	4984	Q9H4A6|GOLP3_HUMAN	211.4	33811	6	27	Golgi phosphoprotein 3 OS=Homo sapiens OX=9606 GN=GOLPH3 PE=1 SV=1	Q9H4A6		GOLP3	366.78	295.42	320	254.45	254.15	333.58
1381	852	O75962-4|TRIO_HUMAN	258.56	341599	12	6	Isoform 4 of Triple functional domain protein OS=Homo sapiens OX=9606 GN=TRIO	O75962	4	TRIO	148.13	144.4	158.51	381.87	297.53	347.37
1923	5079	Q92466|DDB2_HUMAN	217.45	47864	8	26	DNA damage-binding protein 2 OS=Homo sapiens OX=9606 GN=DDB2 PE=1 SV=1	Q92466		DDB2	254.41	239.68	270.98	391.01	389.68	384.6
1621	2825	Q99653|CHP1_HUMAN	184.88	22456	7	46	Calcineurin B homologous protein 1 OS=Homo sapiens OX=9606 GN=CHP1 PE=1 SV=3	Q99653		CHP1	296.88	197.39	285.97	470.82	333.11	384.88
1861	2725	Q8IVT2|MISP_HUMAN	190.78	75357	6	13	Mitotic interactor and substrate of PLK1 OS=Homo sapiens OX=9606 GN=MISP PE=1 SV=1	Q8IVT2		MISP	474.63	572.28	488.52	442.25	238.28	375.27
1468	3128	P55210-4|CASP7_HUMAN	190.85	31614	6	36	Isoform 4 of Caspase-7 OS=Homo sapiens OX=9606 GN=CASP7	P55210	4	CASP7	303.34	181.78	203	353.49	305.31	357.42
1998	5813	P42785-2|PCP_HUMAN	182.87	58100	4	12	Isoform 2 of Lysosomal Pro-X carboxypeptidase OS=Homo sapiens OX=9606 GN=PRCP	P42785	2	PCP	216.58	296.01	178.89	342.42	147.72	343.5
1767	5480	Q9Y2R9|RT07_HUMAN	205.43	28134	7	33	28S ribosomal protein S7 mitochondrial OS=Homo sapiens OX=9606 GN=MRPS7 PE=1 SV=2	Q9Y2R9		RT07	151.83	126.11	98.98	550.33	440.47	416.91
1679	1696	O95155-2|UBE4B_HUMAN	235.94	133275	10	13	Isoform 2 of Ubiquitin conjugation factor E4 B OS=Homo sapiens OX=9606 GN=UBE4B	O95155	2	UBE4B	86.47	345.92	292.17	419.02	205.9	360.62
1088	1377	Q07866-6|KLC1_HUMAN	256.25	71006	11	34	Isoform N of Kinesin light chain 1 OS=Homo sapiens OX=9606 GN=KLC1	Q07866	6	KLC1	326.27	233.62	196.17	338.74	243.43	363.02
2312	3445	P13798|ACPH_HUMAN	243.35	81225	11	29	Acylamino-acid-releasing enzyme OS=Homo sapiens OX=9606 GN=APEH PE=1 SV=4	P13798		ACPH	300.74	291.23	294.62	436.82	456.94	381.4
1720	4313	P62633-4|CNBP_HUMAN	209.23	19592	5	33	Isoform 4 of Cellular nucleic acid-binding protein OS=Homo sapiens OX=9606 GN=CNBP	P62633	4	CNBP	1298.55	1513.45	1513.9	396.63	183.68	381.4
1742	4264	Q9Y5M8|SRPRB_HUMAN	240.98	29702	9	38	Signal recognition particle receptor subunit beta OS=Homo sapiens OX=9606 GN=SRPRB PE=1 SV=3	Q9Y5M8		SRPRB	658.79	473.88	539.92	454.33	318.39	381.25
1911	2354	O75116|ROCK2_HUMAN	212.66	160899	5	8	Rho-associated protein kinase 2 OS=Homo sapiens OX=9606 GN=ROCK2 PE=1 SV=4	O75116		ROCK2	172.03	56.6	210.3	255.38	234.26	330.6
2560	6294	P35610|SOAT1_HUMAN	142.2	64735	3	6	Sterol O-acyltransferase 1 OS=Homo sapiens OX=9606 GN=SOAT1 PE=1 SV=3	P35610		SOAT1	114.37	131.33	150.7	178.86	199.58	280.27
1414	1742	Q9BQ52|RNZ2_HUMAN	280.26	92219	14	34	Zinc phosphodiesterase ELAC protein 2 OS=Homo sapiens OX=9606 GN=ELAC2 PE=1 SV=2	Q9BQ52		RNZ2	248.7	181.77	167.72	356.91	310.01	355.54
1301	3105	P23219-3|PGH1_HUMAN	234.65	61930	8	28	Isoform 3 of Prostaglandin G/H synthase 1 OS=Homo sapiens OX=9606 GN=PTGS1	P23219	3	PGH1	768.53	259.44	339.38	396.87	511.33	438.26
1721	4610	P07203|GPX1_HUMAN	207.3	22088	7	56	Glutathione peroxidase 1 OS=Homo sapiens OX=9606 GN=GPX1 PE=1 SV=4	P07203		GPX1	383.7	403.35	218.02	129.19	399.9	356.31
1246	1111	P16157-2|ANK1_HUMAN	276.16	166479	12	16	Isoform Er16 of Ankyrin-1 OS=Homo sapiens OX=9606 GN=ANK1	P16157	2	ANK1	137.02	207.75	180.21	404.81	340.75	379.2
1860	2905	O94822-3|LTN1_HUMAN	209.07	205176	7	6	Isoform 3 of E3 ubiquitin-protein ligase listerin OS=Homo sapiens OX=9606 GN=LTN1	O94822	3	LTN1	243.53	259.04	204.6	298.18	254.33	338.19
1488	2223	P13674-2|P4HA1_HUMAN	232.45	60967	10	22	Isoform 2 of Prolyl 4-hydroxylase subunit alpha-1 OS=Homo sapiens OX=9606 GN=P4HA1	P13674	2	P4HA1	130.35	46.4	57.08	294.67	280.98	338.52
2279	6501	Q16718|NDUA5_HUMAN	197.92	13459	5	66	NADH dehydrogenase [ubiquinone] 1 alpha subcomplex subunit 5 OS=Homo sapiens OX=9606 GN=NDUFA5 PE=1 SV=3	Q16718		NDUA5	160.73	170.63	177.2	514.83	370.9	380.46
1422	2012	P26368-2|U2AF2_HUMAN	236.76	53121	12	46	Isoform 2 of Splicing factor U2AF 65 kDa subunit OS=Homo sapiens OX=9606 GN=U2AF2	P26368	2	U2AF2	501.18	593.18	1094.27	1144.38	447.6	411.6
3398	7058	P06730|IF4E_HUMAN	94.83	25097	1	6	Eukaryotic translation initiation factor 4E OS=Homo sapiens OX=9606 GN=EIF4E PE=1 SV=2	P06730		IF4E	359.94	306.02	252.14	289.65	343.81	354.96
1238	2500	Q9Y6G9|DC1L1_HUMAN	236.34	56579	10	29	Cytoplasmic dynein 1 light intermediate chain 1 OS=Homo sapiens OX=9606 GN=DYNC1LI1 PE=1 SV=3	Q9Y6G9		DC1L1	352.45	332.14	464.28	350.49	337.84	377.28
2120	5182	P10619-2|PPGB_HUMAN	181.51	52489	4	12	Isoform 2 of Lysosomal protective protein OS=Homo sapiens OX=9606 GN=CTSA	P10619	2	PPGB	94.51	71.66	13.78	325.13	298.45	347.36
2302	24782	Q16864-2|VATF_HUMAN	166.63	16402	3	26	Isoform 2 of V-type proton ATPase subunit F OS=Homo sapiens OX=9606 GN=ATP6V1F	Q16864	2	VATF	135.05	151.37	63.7	405.43	386.61	383.58
2254	2973	Q9BRK5|CAB45_HUMAN	209.95	41807	7	36	45 kDa calcium-binding protein OS=Homo sapiens OX=9606 GN=SDF4 PE=1 SV=1	Q9BRK5		CAB45	269.26	329.84	269.82	540.04	385.48	397.54
1669	2050	Q9NTJ5|SAC1_HUMAN	265.37	66967	8	20	Phosphatidylinositol-3-phosphatase SAC1 OS=Homo sapiens OX=9606 GN=SACM1L PE=1 SV=2	Q9NTJ5		SAC1	273.41	253.26	152.55	606.26	368.76	432.41
1254	3592	Q9P0V9-2|SEP10_HUMAN	231	58136	8	29	Isoform 2 of Septin-10 OS=Homo sapiens OX=9606 GN=SEPTIN10	Q9P0V9	2	2010-09-01	297.19	333.66	346.15	378.22	337.41	374.67
1986	2593	Q3KQU3-2|MA7D1_HUMAN	201.74	88726	7	8	Isoform 2 of MAP7 domain-containing protein 1 OS=Homo sapiens OX=9606 GN=MAP7D1	Q3KQU3	2	MA7D1	402.89	352.36	415.29	180.39	237.6	311.4
2479	4290	Q9HD45|TM9S3_HUMAN	157.88	67888	5	12	Transmembrane 9 superfamily member 3 OS=Homo sapiens OX=9606 GN=TM9SF3 PE=1 SV=2	Q9HD45		TM9S3	169.8	133.36	77.07	317.45	191.71	344.51
1714	4424	P82933|RT09_HUMAN	188.6	45835	8	24	28S ribosomal protein S9 mitochondrial OS=Homo sapiens OX=9606 GN=MRPS9 PE=1 SV=2	P82933		RT09	43.15	79.71	10.88	163.22	311.89	282.77
2716	8359	P50613|CDK7_HUMAN	98.04	39038	2	10	Cyclin-dependent kinase 7 OS=Homo sapiens OX=9606 GN=CDK7 PE=1 SV=1	P50613		CDK7	65.96	201.06	216.79	201.05	86.94	272.64
1734	3722	P82673|RT35_HUMAN	198.43	36844	8	42	28S ribosomal protein S35 mitochondrial OS=Homo sapiens OX=9606 GN=MRPS35 PE=1 SV=1	P82673		RT35	143.29	132.84	160.55	354.39	368.87	371.16
1064	1160	Q5T1M5|FKB15_HUMAN	306.4	133630	14	15	FK506-binding protein 15 OS=Homo sapiens OX=9606 GN=FKBP15 PE=1 SV=2	Q5T1M5		FKB15	548.42	556.82	396.67	473.21	401.85	373.3
1475	2284	Q9UI26|IPO11_HUMAN	231.48	112535	9	14	Importin-11 OS=Homo sapiens OX=9606 GN=IPO11 PE=1 SV=1	Q9UI26		IPO11	275.58	221.14	239.67	311.24	340.33	357.26
1370	1544	P83436|COG7_HUMAN	235.39	86344	10	19	Conserved oligomeric Golgi complex subunit 7 OS=Homo sapiens OX=9606 GN=COG7 PE=1 SV=1	P83436		COG7	356.94	355	317.06	412.04	390.11	370.55
1818	4096	O75955|FLOT1_HUMAN	232.18	47355	6	23	Flotillin-1 OS=Homo sapiens OX=9606 GN=FLOT1 PE=1 SV=3	O75955		FLOT1	264.82	218.62	167.19	415.37	398.29	381.3
1865	4583	O94760|DDAH1_HUMAN	192.77	31122	6	30	N(G) N(G)-dimethylarginine dimethylaminohydrolase 1 OS=Homo sapiens OX=9606 GN=DDAH1 PE=1 SV=3	O94760		DDAH1	278.79	285.02	145.92	352.69	320.8	369.29
1589	728	Q5SRE5|NU188_HUMAN	273.09	196041	18	16	Nucleoporin NUP188 homolog OS=Homo sapiens OX=9606 GN=NUP188 PE=1 SV=1	Q5SRE5		NU188	120.19	78	99.17	366.14	253.5	362.33
1700	2993	Q9BWS9|CHID1_HUMAN	233.38	44941	7	28	Chitinase domain-containing protein 1 OS=Homo sapiens OX=9606 GN=CHID1 PE=1 SV=1	Q9BWS9		CHID1	339.41	330.37	321.56	504.4	512.95	390.86
1934	3655	Q8TD43|TRPM4_HUMAN	189.49	134301	5	7	Transient receptor potential cation channel subfamily M member 4 OS=Homo sapiens OX=9606 GN=TRPM4 PE=1 SV=1	Q8TD43		TRPM4	313.45	214.2	284.93	324.62	332.79	357.62
1366	2271	O00566|MPP10_HUMAN	224.77	78864	9	22	U3 small nucleolar ribonucleoprotein protein MPP10 OS=Homo sapiens OX=9606 GN=MPHOSPH10 PE=1 SV=2	O00566		MPP10	537	301.78	351.12	337.37	348.07	368.81
2081	4725	O75027-2|ABCB7_HUMAN	160.7	82769	4	12	Isoform 2 of ATP-binding cassette sub-family B member 7 mitochondrial OS=Homo sapiens OX=9606 GN=ABCB7	O75027	2	ABCB7	49.08	225.04	193.56	244.9	405.72	368.45
2048	4472	P53367|ARFP1_HUMAN	228.08	41738	4	18	Arfaptin-1 OS=Homo sapiens OX=9606 GN=ARFIP1 PE=1 SV=2	P53367		ARFP1	320.04	328.84	368.06	390.27	325.87	367.22
1331	4384	Q2TAY7|SMU1_HUMAN	216.88	57544	7	19	WD40 repeat-containing protein SMU1 OS=Homo sapiens OX=9606 GN=SMU1 PE=1 SV=2	Q2TAY7		SMU1	170.25	133.04	103.69	401.34	388.02	375.96
22	89	Q13813|SPTN1_HUMAN	563.87	284538	1	56	Spectrin alpha chain non-erythrocytic 1 OS=Homo sapiens OX=9606 GN=SPTAN1 PE=1 SV=3	Q13813		SPTN1	268.32	292.46	354.51	393.5	332.87	366.72
1225	2304	Q12788|TBL3_HUMAN	263.92	89035	9	20	Transducin beta-like protein 3 OS=Homo sapiens OX=9606 GN=TBL3 PE=1 SV=2	Q12788		TBL3	256.92	172.89	206.54	293.53	329	343.35
1201	1650	O14787-2|TNPO2_HUMAN	238.14	100408	8	19	Isoform 2 of Transportin-2 OS=Homo sapiens OX=9606 GN=TNPO2	O14787	2	TNPO2	284.78	189.49	189.52	372.21	357.75	365.63
2115	7727	Q5JS54-2|PSMG4_HUMAN	148.08	17656	3	33	Isoform 2 of Proteasome assembly chaperone 4 OS=Homo sapiens OX=9606 GN=PSMG4	Q5JS54	2	PSMG4	191.52	159.38	230.01	291.78	271.06	318.54
1122	2639	P19623|SPEE_HUMAN	256.1	33825	12	65	Spermidine synthase OS=Homo sapiens OX=9606 GN=SRM PE=1 SV=1	P19623		SPEE	217.31	213.51	134.72	338.11	224.26	355.75
962	1954	Q9NVA2-2|SEP11_HUMAN	272.56	50823	10	34	Isoform 2 of Septin-11 OS=Homo sapiens OX=9606 GN=SEPTIN11	Q9NVA2	2	2011-09-01	469.68	397.59	463.31	575.87	483.61	460.8
153	1197	P52895|AK1C2_HUMAN	338.77	36735	3	65	Aldo-keto reductase family 1 member C2 OS=Homo sapiens OX=9606 GN=AKR1C2 PE=1 SV=3	P52895		AK1C2	229.13	728.53	156.31	596.34	792	363.85
2056	2194	P48681|NEST_HUMAN	190.08	177438	8	6	Nestin OS=Homo sapiens OX=9606 GN=NES PE=1 SV=2	P48681		NEST	149.11	56	41.99	667.2	524.53	363.76
1657	3690	O43660-2|PLRG1_HUMAN	227.13	56290	7	26	Isoform 2 of Pleiotropic regulator 1 OS=Homo sapiens OX=9606 GN=PLRG1	O43660	2	PLRG1	163.85	81.73	200.51	196.43	212.47	287.94
1518	2186	Q10713|MPPA_HUMAN	252.25	58253	13	36	Mitochondrial-processing peptidase subunit alpha OS=Homo sapiens OX=9606 GN=PMPCA PE=1 SV=2	Q10713		MPPA	267.7	466.86	333.1	655.45	473.25	471.45
2148	3302	Q9BQ39|DDX50_HUMAN	170.68	82565	5	10	ATP-dependent RNA helicase DDX50 OS=Homo sapiens OX=9606 GN=DDX50 PE=1 SV=1	Q9BQ39		DDX50	184.14	105.28	159.51	266.71	169.57	290.31
2064	3927	Q9GZL7|WDR12_HUMAN	211.7	47708	7	23	Ribosome biogenesis protein WDR12 OS=Homo sapiens OX=9606 GN=WDR12 PE=1 SV=2	Q9GZL7		WDR12	279.57	279.24	221.27	250.67	337.16	321.5
1651	1218	P46100|ATRX_HUMAN	235.48	282584	10	6	Transcriptional regulator ATRX OS=Homo sapiens OX=9606 GN=ATRX PE=1 SV=5	P46100		ATRX	136.03	126.92	39.64	339.62	282.36	359.79
1117	2353	P55263|ADK_HUMAN	275.11	40545	15	51	Adenosine kinase OS=Homo sapiens OX=9606 GN=ADK PE=1 SV=2	P55263		ADK	337.33	262.01	175.77	366.41	396.69	372.65
3357	32937	P56378|ATP68_HUMAN	68.73	6662	1	21	ATP synthase subunit ATP5MPL mitochondrial OS=Homo sapiens OX=9606 GN=ATP5MPL PE=1 SV=1	P56378		ATP68	254.79	214.52	209.35	313.53	345.2	346.81
2576	3311	Q7Z4H8-3|PLGT3_HUMAN	178.34	47400	7	23	Isoform 3 of Protein O-glucosyltransferase 3 OS=Homo sapiens OX=9606 GN=POGLUT3	Q7Z4H8	3	PLGT3	136.99	114.25	132.87	141.32	264.04	278.78
2313	3888	Q8IYI6|EXOC8_HUMAN	183.3	81799	6	16	Exocyst complex component 8 OS=Homo sapiens OX=9606 GN=EXOC8 PE=1 SV=2	Q8IYI6		EXOC8	129.35	166.21	214	124	190.94	271.06
998	3391	Q09028-3|RBBP4_HUMAN	248.47	46158	5	33	Isoform 3 of Histone-binding protein RBBP4 OS=Homo sapiens OX=9606 GN=RBBP4	Q09028	3	RBBP4	302.78	388.38	238.6	323.07	240.84	317.67
1183	794	Q12769|NU160_HUMAN	271.23	162121	16	20	Nuclear pore complex protein Nup160 OS=Homo sapiens OX=9606 GN=NUP160 PE=1 SV=3	Q12769		NU160	313.34	242.48	295.42	541.4	350.05	390.33
1833	3407	Q9NUQ9|CYRIB_HUMAN	237.72	36748	8	47	CYFIP-related Rac1 interactor B OS=Homo sapiens OX=9606 GN=CYRIB PE=1 SV=1	Q9NUQ9		CYRIB	272.69	376.23	262.1	443.93	364.94	374.39
1849	3281	P48729|KC1A_HUMAN	214.66	38915	6	24	Casein kinase I isoform alpha OS=Homo sapiens OX=9606 GN=CSNK1A1 PE=1 SV=2	P48729		KC1A	365.98	268.46	288.81	312.59	298.97	340.94
1426	3403	O15382|BCAT2_HUMAN	242.41	44288	10	33	Branched-chain-amino-acid aminotransferase mitochondrial OS=Homo sapiens OX=9606 GN=BCAT2 PE=1 SV=2	O15382		BCAT2	299.76	295.01	317.29	480.87	365.61	357.75
1505	3724	P19525|E2AK2_HUMAN	189.59	62094	8	15	Interferon-induced double-stranded RNA-activated protein kinase OS=Homo sapiens OX=9606 GN=EIF2AK2 PE=1 SV=2	P19525		E2AK2	729.45	630.68	552.38	393.63	259.51	357.58
2276	6142	Q8WVM0|TFB1M_HUMAN	163.04	39543	3	18	Dimethyladenosine transferase 1 mitochondrial OS=Homo sapiens OX=9606 GN=TFB1M PE=1 SV=1	Q8WVM0		TFB1M	85.32	27.39	24.24	326.19	89.22	339.84
1554	4854	O75521-2|ECI2_HUMAN	201.64	39609	6	22	Isoform 2 of Enoyl-CoA delta isomerase 2 OS=Homo sapiens OX=9606 GN=ECI2	O75521	2	ECI2	236.21	344.53	341.36	277.48	338.51	346.38
1190	1601	Q86XP3|DDX42_HUMAN	251.1	102975	14	24	ATP-dependent RNA helicase DDX42 OS=Homo sapiens OX=9606 GN=DDX42 PE=1 SV=1	Q86XP3		DDX42	311.01	237.38	196.48	302.6	244.92	303.55
1702	2111	O60547|GMDS_HUMAN	217.27	41950	9	37	GDP-mannose 4 6 dehydratase OS=Homo sapiens OX=9606 GN=GMDS PE=1 SV=1	O60547		GMDS	146.63	277.27	340.18	330.48	402.73	355.97
1011	2631	Q92747|ARC1A_HUMAN	251.66	41569	7	31	Actin-related protein 2/3 complex subunit 1A OS=Homo sapiens OX=9606 GN=ARPC1A PE=2 SV=2	Q92747		ARC1A	414.18	528.23	350.94	242.53	570.12	355.92
1233	1298	Q96SB4-4|SRPK1_HUMAN	246.54	72384	11	26	Isoform 3 of SRSF protein kinase 1 OS=Homo sapiens OX=9606 GN=SRPK1	Q96SB4	4	SRPK1	183.11	382.51	378.28	441.31	297.51	343.84
1982	6795	O95197-3|RTN3_HUMAN	182.13	25609	3	12	Isoform 3 of Reticulon-3 OS=Homo sapiens OX=9606 GN=RTN3	O95197	3	RTN3	586.08	459.67	453.4	205.23	316.67	324.34
2004	3613	O95747|OXSR1_HUMAN	186.96	58022	7	19	Serine/threonine-protein kinase OSR1 OS=Homo sapiens OX=9606 GN=OXSR1 PE=1 SV=1	O95747		OXSR1	197.84	160.06	189.01	353.12	600.96	355.06
1963	5513	Q13596-2|SNX1_HUMAN	197.65	51813	6	15	Isoform 1A of Sorting nexin-1 OS=Homo sapiens OX=9606 GN=SNX1	Q13596	2	SNX1	339.37	169.52	198.13	382.48	383.15	354.65
1408	2502	Q92797|SYMPK_HUMAN	241.45	141148	10	15	Symplekin OS=Homo sapiens OX=9606 GN=SYMPK PE=1 SV=2	Q92797		SYMPK	279.23	302.66	178.99	365.41	266.08	347.89
1625	2659	Q3ZCQ8-2|TIM50_HUMAN	206.97	50465	6	18	Isoform 2 of Mitochondrial import inner membrane translocase subunit TIM50 OS=Homo sapiens OX=9606 GN=TIMM50	Q3ZCQ8	2	TIM50	190.68	194.95	400.48	253.49	546.89	309.36
444	4196	O60361|NDK8_HUMAN	241.16	15529	1	48	Putative nucleoside diphosphate kinase OS=Homo sapiens OX=9606 GN=NME2P1 PE=5 SV=1	O60361		NDK8	268.75	240.37	243.85	135.82	0	177.15
1255	3201	Q96PK6|RBM14_HUMAN	209.03	69492	6	13	RNA-binding protein 14 OS=Homo sapiens OX=9606 GN=RBM14 PE=1 SV=2	Q96PK6		RBM14	263.12	294.52	162.95	239.57	348.55	344.85
988	956	O15031|PLXB2_HUMAN	286.38	205126	17	16	Plexin-B2 OS=Homo sapiens OX=9606 GN=PLXNB2 PE=1 SV=3	O15031		PLXB2	281.9	401.53	94.01	270.36	371.71	353.12
1464	2426	Q8N163|CCAR2_HUMAN	243.88	102902	8	16	Cell cycle and apoptosis regulator protein 2 OS=Homo sapiens OX=9606 GN=CCAR2 PE=1 SV=2	Q8N163		CCAR2	299.15	213.49	243.62	327.78	381.72	364.1
884	1085	Q96P48-3|ARAP1_HUMAN	309.75	160994	16	16	Isoform 3 of Arf-GAP with Rho-GAP domain ANK repeat and PH domain-containing protein 1 OS=Homo sapiens OX=9606 GN=ARAP1	Q96P48	3	ARAP1	449.35	493.17	558.07	496	548.75	402.54
1419	4953	Q9UHQ4-2|BAP29_HUMAN	170.31	40797	3	9	Isoform 2 of B-cell receptor-associated protein 29 OS=Homo sapiens OX=9606 GN=BCAP29	Q9UHQ4	2	BAP29	334.53	281.35	261.17	416.66	510.97	400.33
2460	5170	Q16890-5|TPD53_HUMAN	186.22	19456	5	28	Isoform 5 of Tumor protein D53 OS=Homo sapiens OX=9606 GN=TPD52L1	Q16890	5	TPD53	352.53	213.05	181.31	218.47	192.6	278.67
1825	8392	Q9Y2B0|CNPY2_HUMAN	162.68	20652	4	25	Protein canopy homolog 2 OS=Homo sapiens OX=9606 GN=CNPY2 PE=1 SV=1	Q9Y2B0		CNPY2	253.91	72.53	157.28	271.86	385.03	350.68
1571	2938	Q8IZP0-2|ABI1_HUMAN	237.5	48678	7	26	Isoform 2 of Abl interactor 1 OS=Homo sapiens OX=9606 GN=ABI1	Q8IZP0	2	ABI1	38.82	244.96	253.53	458.4	236.24	370.2
2209	5301	Q8NCG7|DGLB_HUMAN	141.27	73732	3	7	Diacylglycerol lipase-beta OS=Homo sapiens OX=9606 GN=DAGLB PE=1 SV=2	Q8NCG7		DGLB	234.67	185.59	276.84	291.2	229.78	308.83
3220	24855	P62273|RS29_HUMAN	87.37	6677	2	34	40S ribosomal protein S29 OS=Homo sapiens OX=9606 GN=RPS29 PE=1 SV=2	P62273		RS29	372.85	186.32	363.61	325.89	335.52	338.33
1300	2269	Q9Y4W6|AFG32_HUMAN	233.48	88584	10	15	AFG3-like protein 2 OS=Homo sapiens OX=9606 GN=AFG3L2 PE=1 SV=2	Q9Y4W6		AFG32	241.77	327.04	186.74	355.71	808.81	418.68
3344	8047	Q969U7-2|PSMG2_HUMAN	76.47	26321	1	5	Isoform 2 of Proteasome assembly chaperone 2 OS=Homo sapiens OX=9606 GN=PSMG2	Q969U7	2	PSMG2	298.82	302.82	312.23	332.27	311.29	340.6
1009	1541	Q9BW04|SARG_HUMAN	237.63	63964	9	28	Specifically androgen-regulated gene protein OS=Homo sapiens OX=9606 GN=SARG PE=1 SV=2	Q9BW04		SARG	791.66	914.99	879.38	474.23	305.17	348.78
1299	1497	Q8NI27|THOC2_HUMAN	256.37	182774	13	13	THO complex subunit 2 OS=Homo sapiens OX=9606 GN=THOC2 PE=1 SV=2	Q8NI27		THOC2	220.87	273.6	247.23	621.73	452.5	398.42
1770	5036	Q8NFH5-2|NUP35_HUMAN	206.75	33120	5	20	Isoform 2 of Nucleoporin NUP35 OS=Homo sapiens OX=9606 GN=NUP35	Q8NFH5	2	NUP35	279.18	306.75	337	380.49	444.94	383.33
1356	2065	P28288|ABCD3_HUMAN	265.12	75476	14	27	ATP-binding cassette sub-family D member 3 OS=Homo sapiens OX=9606 GN=ABCD3 PE=1 SV=1	P28288		ABCD3	282.36	235.2	362.99	455.5	330.33	360.86
1654	5504	Q9BQ61|TRIR_HUMAN	200	18419	6	40	Telomerase RNA component interacting RNase OS=Homo sapiens OX=9606 GN=TRIR PE=1 SV=1	Q9BQ61		TRIR	393.79	1165.92	1937	1591.59	188.51	350.87
2146	1512	O00468-6|AGRIN_HUMAN	184.7	214844	10	7	Isoform 6 of Agrin OS=Homo sapiens OX=9606 GN=AGRN	O00468	6	AGRIN	139.8	142.2	208.74	355.9	263.06	345.23
2518	3504	O00764|PDXK_HUMAN	161.09	35102	6	21	Pyridoxal kinase OS=Homo sapiens OX=9606 GN=PDXK PE=1 SV=1	O00764		PDXK	297.21	274.18	292.44	745.63	507	358.12
1682	1596	Q14692|BMS1_HUMAN	248.13	145807	11	14	Ribosome biogenesis protein BMS1 homolog OS=Homo sapiens OX=9606 GN=BMS1 PE=1 SV=1	Q14692		BMS1	255.7	217.35	179.7	314.06	250.54	319.91
2699	6837	Q9P0J0-2|NDUAD_HUMAN	110.63	24882	2	11	Isoform 2 of NADH dehydrogenase [ubiquinone] 1 alpha subcomplex subunit 13 OS=Homo sapiens OX=9606 GN=NDUFA13	Q9P0J0	2	NDUAD	45.65	122.09	107.69	338.35	294.54	343.32
1876	9812	P62256|UBE2H_HUMAN	163.85	20655	3	15	Ubiquitin-conjugating enzyme E2 H OS=Homo sapiens OX=9606 GN=UBE2H PE=1 SV=1	P62256		UBE2H	173.44	242.32	178.13	289.35	271.43	323.5
1642	3940	O43809|CPSF5_HUMAN	220.39	26227	9	42	Cleavage and polyadenylation specificity factor subunit 5 OS=Homo sapiens OX=9606 GN=NUDT21 PE=1 SV=1	O43809		CPSF5	698.93	790.5	643.27	1054.6	380.51	372.51
1125	2158	O60488-2|ACSL4_HUMAN	287.53	74436	14	33	Isoform Short of Long-chain-fatty-acid--CoA ligase 4 OS=Homo sapiens OX=9606 GN=ACSL4	O60488	2	ACSL4	451.26	348.25	398.83	522.03	312.52	342.21
1850	4087	Q6NXG1|ESRP1_HUMAN	178.47	75585	4	11	Epithelial splicing regulatory protein 1 OS=Homo sapiens OX=9606 GN=ESRP1 PE=1 SV=2	Q6NXG1		ESRP1	621.97	516.85	633.82	415.35	365.83	343.4
1428	4391	O00767|ACOD_HUMAN	225.92	41523	8	38	Acyl-CoA desaturase OS=Homo sapiens OX=9606 GN=SCD PE=1 SV=2	O00767		ACOD	107.97	81.29	129.63	1182.06	164.14	341.78
85	753	Q13509|TBB3_HUMAN	410.17	50433	8	59	Tubulin beta-3 chain OS=Homo sapiens OX=9606 GN=TUBB3 PE=1 SV=2	Q13509		TBB3	212.36	239.06	108.96	661.69	292.03	341.43
3707	78235	Q9Y2R0|COA3_HUMAN	80.36	11731	2	18	Cytochrome c oxidase assembly factor 3 homolog mitochondrial OS=Homo sapiens OX=9606 GN=COA3 PE=1 SV=1	Q9Y2R0		COA3	0	253.71	142.41	274.93	354.25	319.68
2111	4203	Q9Y5X3|SNX5_HUMAN	162.73	46817	4	13	Sorting nexin-5 OS=Homo sapiens OX=9606 GN=SNX5 PE=1 SV=1	Q9Y5X3		SNX5	64.88	146.32	173.49	319.96	216.19	336.6
3487	5977	Q96DZ1|ERLEC_HUMAN	132.04	54858	3	9	Endoplasmic reticulum lectin 1 OS=Homo sapiens OX=9606 GN=ERLEC1 PE=1 SV=1	Q96DZ1		ERLEC	45.99	36.67	35.36	24.58	194.77	194.67
1467	4326	P82675|RT05_HUMAN	197.32	48007	5	12	28S ribosomal protein S5 mitochondrial OS=Homo sapiens OX=9606 GN=MRPS5 PE=1 SV=2	P82675		RT05	193.09	120.69	97.97	492.85	414.58	376.03
1947	3286	O94992|HEXI1_HUMAN	221.54	40623	8	30	Protein HEXIM1 OS=Homo sapiens OX=9606 GN=HEXIM1 PE=1 SV=1	O94992		HEXI1	110.31	173.05	109.13	286.55	355.85	329.29
1523	3284	Q96A49|SYAP1_HUMAN	236.3	39933	6	21	Synapse-associated protein 1 OS=Homo sapiens OX=9606 GN=SYAP1 PE=1 SV=1	Q96A49		SYAP1	93.96	117.81	62.87	243.27	304.84	306.49
1952	4336	Q9BYD6|RM01_HUMAN	172.01	36909	6	24	39S ribosomal protein L1 mitochondrial OS=Homo sapiens OX=9606 GN=MRPL1 PE=1 SV=2	Q9BYD6		RM01	242.74	222.17	247.01	431.54	341.11	344.21
1732	3091	Q9Y5K5-2|UCHL5_HUMAN	231.32	36079	9	41	Isoform 2 of Ubiquitin carboxyl-terminal hydrolase isozyme L5 OS=Homo sapiens OX=9606 GN=UCHL5	Q9Y5K5	2	UCHL5	364.8	284.45	268.16	379.88	375.57	354
1674	4389	O75832|PSD10_HUMAN	206.23	24428	7	47	26S proteasome non-ATPase regulatory subunit 10 OS=Homo sapiens OX=9606 GN=PSMD10 PE=1 SV=1	O75832		PSD10	252.97	251.22	251.66	388.85	555.06	345.66
2904	6008	Q92530|PSMF1_HUMAN	130.16	29817	4	20	Proteasome inhibitor PI31 subunit OS=Homo sapiens OX=9606 GN=PSMF1 PE=1 SV=2	Q92530		PSMF1	171.16	324.44	337.21	356.51	342.6	338.82
1536	2990	Q5SY16|NOL9_HUMAN	201.59	79323	6	13	Polynucleotide 5'-hydroxyl-kinase NOL9 OS=Homo sapiens OX=9606 GN=NOL9 PE=1 SV=1	Q5SY16		NOL9	276.35	181.49	223.43	353.93	294.17	324.65
2089	2548	O95239|KIF4A_HUMAN	199.99	139881	7	9	Chromosome-associated kinesin KIF4A OS=Homo sapiens OX=9606 GN=KIF4A PE=1 SV=3	O95239		KIF4A	42.83	51.4	43.15	170.13	217.87	271.91
1783	4529	O15145|ARPC3_HUMAN	143.94	20547	4	27	Actin-related protein 2/3 complex subunit 3 OS=Homo sapiens OX=9606 GN=ARPC3 PE=1 SV=3	O15145		ARPC3	294.48	359.18	319.45	411.54	389.91	362.31
228	706	O43390|HNRPR_HUMAN	342.65	70943	2	42	Heterogeneous nuclear ribonucleoprotein R OS=Homo sapiens OX=9606 GN=HNRNPR PE=1 SV=1	O43390		HNRPR	35.79	67.53	90.25	69.72	147.05	237.87
1578	2475	Q03701|CEBPZ_HUMAN	219.98	120974	8	11	CCAAT/enhancer-binding protein zeta OS=Homo sapiens OX=9606 GN=CEBPZ PE=1 SV=3	Q03701		CEBPZ	172.33	194.27	207.47	346.46	317.06	339.84
1387	3646	Q14232|EI2BA_HUMAN	225.42	33712	7	37	Translation initiation factor eIF-2B subunit alpha OS=Homo sapiens OX=9606 GN=EIF2B1 PE=1 SV=1	Q14232		EI2BA	366.79	489.45	290.07	624.18	458.23	451.18
558	2970	P08754|GNAI3_HUMAN	257.5	40532	5	36	Guanine nucleotide-binding protein G(i) subunit alpha OS=Homo sapiens OX=9606 GN=GNAI3 PE=1 SV=3	P08754		GNAI3	501.78	650.1	730.47	551.66	540.81	442.53
2623	7161	P32320|CDD_HUMAN	145.53	16185	4	37	Cytidine deaminase OS=Homo sapiens OX=9606 GN=CDA PE=1 SV=2	P32320		CDD	182.89	319.49	257.35	215.9	216.89	290.09
1870	5415	O00233|PSMD9_HUMAN	166.82	24682	5	26	26S proteasome non-ATPase regulatory subunit 9 OS=Homo sapiens OX=9606 GN=PSMD9 PE=1 SV=3	O00233		PSMD9	221.43	249.14	230.34	284.21	93.84	299.64
2036	6012	Q6ZVM7-2|TM1L2_HUMAN	214.04	49964	5	15	Isoform 2 of TOM1-like protein 2 OS=Homo sapiens OX=9606 GN=TOM1L2	Q6ZVM7	2	TM1L2	56.06	76.07	53.03	146.25	164	248.06
2551	8084	Q8NCW5|NNRE_HUMAN	178.22	31675	7	36	NAD(P)H-hydrate epimerase OS=Homo sapiens OX=9606 GN=NAXE PE=1 SV=2	Q8NCW5		NNRE	93.99	105.6	22.82	187.21	129.04	232.61
1800	1902	Q02388-2|CO7A1_HUMAN	209.13	292264	7	5	Isoform 2 of Collagen alpha-1(VII) chain OS=Homo sapiens OX=9606 GN=COL7A1	Q02388	2	CO7A1	43.95	131.29	144.38	248.13	200.24	279.95
2246	3863	P49757-3|NUMB_HUMAN	189.06	69431	5	9	Isoform 3 of Protein numb homolog OS=Homo sapiens OX=9606 GN=NUMB	P49757	3	NUMB	323.24	325.97	293.45	315.7	267.49	316.52
1471	4282	Q9BQ67|GRWD1_HUMAN	219.23	49419	6	28	Glutamate-rich WD repeat-containing protein 1 OS=Homo sapiens OX=9606 GN=GRWD1 PE=1 SV=1	Q9BQ67		GRWD1	200.44	413.26	240.91	262.34	224.58	306.07
2557	9644	P28347|TEAD1_HUMAN	118.91	47946	2	8	Transcriptional enhancer factor TEF-1 OS=Homo sapiens OX=9606 GN=TEAD1 PE=1 SV=2	P28347		TEAD1	17.38	92.43	0	288.91	284.78	309.49
1565	1645	Q9BUQ8|DDX23_HUMAN	240.21	95583	9	14	Probable ATP-dependent RNA helicase DDX23 OS=Homo sapiens OX=9606 GN=DDX23 PE=1 SV=3	Q9BUQ8		DDX23	108.84	81.61	90	239.44	298.14	309.05
2116	5292	Q9H993|ARMT1_HUMAN	179.75	51172	5	20	Damage-control phosphatase ARMT1 OS=Homo sapiens OX=9606 GN=ARMT1 PE=1 SV=1	Q9H993		ARMT1	278.91	242.56	267.33	310.22	312.26	320.63
1795	4511	Q9Y5A7-2|NUB1_HUMAN	173.24	69119	4	8	Isoform 2 of NEDD8 ultimate buster 1 OS=Homo sapiens OX=9606 GN=NUB1	Q9Y5A7	2	NUB1	273.46	290.98	236.83	376.53	291.58	328.96
1362	799	Q8WXH0-2|SYNE2_HUMAN	254.69	798877	15	3	Isoform 2 of Nesprin-2 OS=Homo sapiens OX=9606 GN=SYNE2	Q8WXH0	2	SYNE2	149.82	124.29	161.27	264.94	306.05	322.63
723	3116	P48594|SPB4_HUMAN	247.15	44854	2	24	Serpin B4 OS=Homo sapiens OX=9606 GN=SERPINB4 PE=1 SV=2	P48594		SPB4	270.83	327.56	237.29	290.52	255.92	328.63
790	458	Q29RF7|PDS5A_HUMAN	292.41	150830	17	22	Sister chromatid cohesion protein PDS5 homolog A OS=Homo sapiens OX=9606 GN=PDS5A PE=1 SV=1	Q29RF7		PDS5A	233.91	205.95	269.81	353.22	386.18	328.42
3089	11666	O75817|POP7_HUMAN	87.56	15651	2	21	Ribonuclease P protein subunit p20 OS=Homo sapiens OX=9606 GN=POP7 PE=1 SV=2	O75817		POP7	64.02	0	104.29	218.48	219.69	277.73
1807	2592	Q6PD62|CTR9_HUMAN	224.97	133502	8	11	RNA polymerase-associated protein CTR9 homolog OS=Homo sapiens OX=9606 GN=CTR9 PE=1 SV=1	Q6PD62		CTR9	234.46	227.75	191.12	296.39	227.16	299.83
2118	7592	P16278-3|BGAL_HUMAN	158.13	72751	3	9	Isoform 3 of Beta-galactosidase OS=Homo sapiens OX=9606 GN=GLB1	P16278	3	BGAL	102.22	170.84	103.85	284.51	292.09	309.18
1746	5604	P32321|DCTD_HUMAN	203.5	20016	6	44	Deoxycytidylate deaminase OS=Homo sapiens OX=9606 GN=DCTD PE=1 SV=2	P32321		DCTD	406.85	322.91	399.11	387.53	345	355.69
1375	2212	P42226|STAT6_HUMAN	258.02	94135	10	23	Signal transducer and activator of transcription 6 OS=Homo sapiens OX=9606 GN=STAT6 PE=1 SV=1	P42226		STAT6	340.32	409.39	732.12	501.89	433.18	333.73
1834	4330	Q9BWF3|RBM4_HUMAN	215.25	40314	3	22	RNA-binding protein 4 OS=Homo sapiens OX=9606 GN=RBM4 PE=1 SV=1	Q9BWF3		RBM4	268.02	163.9	106.39	446.94	298.3	331.44
2534	4917	P37198|NUP62_HUMAN	147.71	53255	5	16	Nuclear pore glycoprotein p62 OS=Homo sapiens OX=9606 GN=NUP62 PE=1 SV=3	P37198		NUP62	103.96	60.18	72.5	247.34	208.96	288.78
2159	6553	Q9H974-4|QTRT2_HUMAN	177.03	48203	4	22	Isoform 4 of Queuine tRNA-ribosyltransferase accessory subunit 2 OS=Homo sapiens OX=9606 GN=QTRT2	Q9H974	4	QTRT2	280.04	261.95	349.87	320.56	220.24	318.34
2461	5232	P38571-2|LICH_HUMAN	191.12	39112	5	32	Isoform 2 of Lysosomal acid lipase/cholesteryl ester hydrolase OS=Homo sapiens OX=9606 GN=LIPA	P38571	2	LICH	87.47	111.96	187.54	328.35	338.44	329.54
1378	2320	P43034|LIS1_HUMAN	245.91	46638	6	26	Platelet-activating factor acetylhydrolase IB subunit alpha OS=Homo sapiens OX=9606 GN=PAFAH1B1 PE=1 SV=2	P43034		LIS1	601.15	463.51	529.71	383.07	441.59	322.3
1140	2002	Q9Y450|HBS1L_HUMAN	256.61	75473	9	25	HBS1-like protein OS=Homo sapiens OX=9606 GN=HBS1L PE=1 SV=1	Q9Y450		HBS1L	267.27	162.91	268.39	325.16	342.84	321.84
1077	1421	Q08379|GOGA2_HUMAN	269.51	113086	11	15	Golgin subfamily A member 2 OS=Homo sapiens OX=9606 GN=GOLGA2 PE=1 SV=3	Q08379		GOGA2	132.16	138.73	246.13	329.7	181.39	304.66
1826	5225	Q13526|PIN1_HUMAN	166.78	18243	4	45	Peptidyl-prolyl cis-trans isomerase NIMA-interacting 1 OS=Homo sapiens OX=9606 GN=PIN1 PE=1 SV=1	Q13526		PIN1	295.63	203.62	39.51	234.25	264.16	302.09
2101	24768	P27449|VATL_HUMAN	131.43	15736	2	34	V-type proton ATPase 16 kDa proteolipid subunit OS=Homo sapiens OX=9606 GN=ATP6V0C PE=1 SV=1	P27449		VATL	253.27	347.01	313.95	355.46	324.14	324.78
1515	1913	Q99615|DNJC7_HUMAN	250.5	56441	9	24	DnaJ homolog subfamily C member 7 OS=Homo sapiens OX=9606 GN=DNAJC7 PE=1 SV=2	Q99615		DNJC7	150.57	208.47	325.7	348.18	358.48	330.58
1355	2182	Q9P0J1|PDP1_HUMAN	247.81	61054	9	24	[Pyruvate dehydrogenase [acetyl-transferring]]-phosphatase 1 mitochondrial OS=Homo sapiens OX=9606 GN=PDP1 PE=1 SV=3	Q9P0J1		PDP1	352.58	314.86	348.02	543.41	494.59	421.52
936	647	Q9Y3P9|RBGP1_HUMAN	290.96	121737	14	20	Rab GTPase-activating protein 1 OS=Homo sapiens OX=9606 GN=RABGAP1 PE=1 SV=3	Q9Y3P9		RBGP1	374.87	557.13	529.43	484.84	424.99	395.51
885	1622	P00505|AATM_HUMAN	267.08	47518	12	41	Aspartate aminotransferase mitochondrial OS=Homo sapiens OX=9606 GN=GOT2 PE=1 SV=3	P00505		AATM	550.62	770.96	521.56	605.3	492.55	409.81
2494	10021	P48556|PSMD8_HUMAN	156.54	39612	4	21	26S proteasome non-ATPase regulatory subunit 8 OS=Homo sapiens OX=9606 GN=PSMD8 PE=1 SV=2	P48556		PSMD8	471.98	457.72	411.24	303.57	375.08	318.96
1189	1356	P55196|AFAD_HUMAN	256.43	206803	13	12	Afadin OS=Homo sapiens OX=9606 GN=AFDN PE=1 SV=3	P55196		AFAD	240.55	165.57	103.67	277.34	505.59	318.72
3399	32954	Q9Y2S6|TMA7_HUMAN	60.2	7066	1	16	Translation machinery-associated protein 7 OS=Homo sapiens OX=9606 GN=TMA7 PE=1 SV=1	Q9Y2S6		TMA7	471.21	448.17	419.5	319.68	311.67	317.97
1898	1800	Q8TD16|BICD2_HUMAN	222.33	93533	11	21	Protein bicaudal D homolog 2 OS=Homo sapiens OX=9606 GN=BICD2 PE=1 SV=1	Q8TD16		BICD2	309.37	312.67	268.11	341.86	374.59	328.69
3321	5524	Q9BUP3-3|HTAI2_HUMAN	87.15	30131	2	7	Isoform 3 of Oxidoreductase HTATIP2 OS=Homo sapiens OX=9606 GN=HTATIP2	Q9BUP3	3	HTAI2	178.69	314.61	329.71	312.29	293.89	313.43
722	2045	Q04917|1433F_HUMAN	225.64	28219	6	41	14-3-3 protein eta OS=Homo sapiens OX=9606 GN=YWHAH PE=1 SV=4	Q04917		1433F	361.17	647.98	449.4	456.88	479.11	389.28
1118	4548	Q99714|HCD2_HUMAN	287.59	26923	12	61	3-hydroxyacyl-CoA dehydrogenase type-2 OS=Homo sapiens OX=9606 GN=HSD17B10 PE=1 SV=3	Q99714		HCD2	182.93	356.55	170.41	455.9	410.26	320.93
1480	3000	Q9P2I0|CPSF2_HUMAN	216.34	88487	8	20	Cleavage and polyadenylation specificity factor subunit 2 OS=Homo sapiens OX=9606 GN=CPSF2 PE=1 SV=2	Q9P2I0		CPSF2	124.68	160.93	71.23	366.48	354	315.34
1928	4400	Q9UI12-2|VATH_HUMAN	175.89	54151	4	13	Isoform 2 of V-type proton ATPase subunit H OS=Homo sapiens OX=9606 GN=ATP6V1H	Q9UI12	2	VATH	258.31	122.89	164.66	223.88	270.01	290.08
1413	835	Q9BZF9|UACA_HUMAN	261.1	162504	12	12	Uveal autoantigen with coiled-coil domains and ankyrin repeats OS=Homo sapiens OX=9606 GN=UACA PE=1 SV=2	Q9BZF9		UACA	313.17	56.19	128.01	219.88	217.22	275.56
1938	4857	P21953|ODBB_HUMAN	175.31	43123	4	22	2-oxoisovalerate dehydrogenase subunit beta mitochondrial OS=Homo sapiens OX=9606 GN=BCKDHB PE=1 SV=2	P21953		ODBB	125.48	110.59	13.86	274.07	249.35	293.12
194	182	P50570|DYN2_HUMAN	352.81	98064	3	47	Dynamin-2 OS=Homo sapiens OX=9606 GN=DNM2 PE=1 SV=2	P50570		DYN2	313.88	484.44	569.76	215.45	285.05	278.03
3431	11833	Q9UJY1|HSPB8_HUMAN	90.45	21604	2	16	Heat shock protein beta-8 OS=Homo sapiens OX=9606 GN=HSPB8 PE=1 SV=1	Q9UJY1		HSPB8	0	0	0	42.09	64.35	190.86
1835	4960	Q96Q11-2|TRNT1_HUMAN	179.96	47829	4	16	Isoform 2 of CCA tRNA nucleotidyltransferase 1 mitochondrial OS=Homo sapiens OX=9606 GN=TRNT1	Q96Q11	2	TRNT1	480.82	414.77	478.03	502.02	500.95	402.37
3252	5758	O15305|PMM2_HUMAN	97.83	28082	2	12	Phosphomannomutase 2 OS=Homo sapiens OX=9606 GN=PMM2 PE=1 SV=1	O15305		PMM2	452.94	390.83	356.81	284.33	297.67	310.02
2106	3195	Q9UJX2|CDC23_HUMAN	199.83	68834	5	13	Cell division cycle protein 23 homolog OS=Homo sapiens OX=9606 GN=CDC23 PE=1 SV=3	Q9UJX2		CDC23	219.77	208.76	193.37	383.26	350.03	339.19
2777	10046	P27216|ANX13_HUMAN	55.37	35415	1	3	Annexin A13 OS=Homo sapiens OX=9606 GN=ANXA13 PE=1 SV=3	P27216		ANX13	349.83	0	407.16	333.88	356.87	322.61
2129	5668	Q15257|PTPA_HUMAN	222.01	40668	7	33	Serine/threonine-protein phosphatase 2A activator OS=Homo sapiens OX=9606 GN=PTPA PE=1 SV=3	Q15257		PTPA	185.59	0	219.59	127.71	324.72	297.86
2005	4261	Q9UJX5|APC4_HUMAN	232.53	92116	6	9	Anaphase-promoting complex subunit 4 OS=Homo sapiens OX=9606 GN=ANAPC4 PE=1 SV=2	Q9UJX5		APC4	244.71	189.4	150.35	342.11	227.61	311.59
1969	1925	P21127-2|CD11B_HUMAN	208.11	91303	11	16	Isoform SV1 of Cyclin-dependent kinase 11B OS=Homo sapiens OX=9606 GN=CDK11B	P21127	2	CD11B	308.01	270.97	292.94	346.59	387.88	327.08
2021	3394	Q8WUA2|PPIL4_HUMAN	171.23	57225	6	22	Peptidyl-prolyl cis-trans isomerase-like 4 OS=Homo sapiens OX=9606 GN=PPIL4 PE=1 SV=1	Q8WUA2		PPIL4	126.76	295.36	195.27	122.73	192.26	249.4
2174	3114	Q15942|ZYX_HUMAN	193.98	61277	9	34	Zyxin OS=Homo sapiens OX=9606 GN=ZYX PE=1 SV=1	Q15942		ZYX	227.08	223.41	235.33	167.82	179.31	248.86
3067	6423	P04183|KITH_HUMAN	134.66	25469	3	26	Thymidine kinase cytosolic OS=Homo sapiens OX=9606 GN=TK1 PE=1 SV=2	P04183		KITH	97.23	93.08	7.83	21.46	184.78	166.03
1907	5086	P19634|SL9A1_HUMAN	230.99	90763	7	12	Sodium/hydrogen exchanger 1 OS=Homo sapiens OX=9606 GN=SLC9A1 PE=1 SV=2	P19634		SL9A1	316.53	305.03	295.46	331.11	287.33	310.29
1929	1310	Q9UKK3|PARP4_HUMAN	224.93	192593	11	11	Protein mono-ADP-ribosyltransferase PARP4 OS=Homo sapiens OX=9606 GN=PARP4 PE=1 SV=3	Q9UKK3		PARP4	61.43	36.67	0	239.47	227.51	273.35
2613	5070	Q9H773|DCTP1_HUMAN	155.57	18681	5	52	dCTP pyrophosphatase 1 OS=Homo sapiens OX=9606 GN=DCTPP1 PE=1 SV=1	Q9H773		DCTP1	34.02	41.65	158.13	280.84	310.08	297.05
979	468	Q12802-2|AKP13_HUMAN	306.27	307845	18	11	Isoform 2 of A-kinase anchor protein 13 OS=Homo sapiens OX=9606 GN=AKAP13	Q12802	2	AKP13	171.51	107.54	121.8	358.03	369.38	315.26
1114	395	Q9Y520-6|PRC2C_HUMAN	280	301570	21	14	Isoform 6 of Protein PRRC2C OS=Homo sapiens OX=9606 GN=PRRC2C	Q9Y520	6	PRC2C	250.84	297.68	271.2	485.89	262.74	309.21
2244	5901	O75381-2|PEX14_HUMAN	147.35	36702	3	12	Isoform 2 of Peroxisomal membrane protein PEX14 OS=Homo sapiens OX=9606 GN=PEX14	O75381	2	PEX14	330.83	246.76	409.05	604.1	308.02	322.86
1333	1711	Q9UGP8|SEC63_HUMAN	254.88	87997	14	23	Translocation protein SEC63 homolog OS=Homo sapiens OX=9606 GN=SEC63 PE=1 SV=2	Q9UGP8		SEC63	322.47	357.91	312.84	385.19	251.63	308.68
2594	10450	Q7Z2W9|RM21_HUMAN	136.9	22815	3	24	39S ribosomal protein L21 mitochondrial OS=Homo sapiens OX=9606 GN=MRPL21 PE=1 SV=2	Q7Z2W9		RM21	137.85	117.51	134.22	257	297.79	301.52
2394	4556	P31751|AKT2_HUMAN	195.31	55769	3	13	RAC-beta serine/threonine-protein kinase OS=Homo sapiens OX=9606 GN=AKT2 PE=1 SV=2	P31751		AKT2	127.78	167.99	158.28	231.71	234.46	269.36
774	1531	Q9H4M9|EHD1_HUMAN	294.51	60627	12	46	EH domain-containing protein 1 OS=Homo sapiens OX=9606 GN=EHD1 PE=1 SV=2	Q9H4M9		EHD1	440.23	219.56	534.11	246.12	523.13	305.98
2207	4223	Q96C86|DCPS_HUMAN	212.29	38609	8	34	m7GpppX diphosphatase OS=Homo sapiens OX=9606 GN=DCPS PE=1 SV=2	Q96C86		DCPS	293.93	197.2	364.71	304.58	344.59	305.9
2275	6472	O95159|ZFPL1_HUMAN	149.1	34114	3	14	Zinc finger protein-like 1 OS=Homo sapiens OX=9606 GN=ZFPL1 PE=1 SV=2	O95159		ZFPL1	318.22	279.51	334.32	376.91	366.07	336.8
1347	1405	Q8TCS8|PNPT1_HUMAN	236.68	85951	13	21	Polyribonucleotide nucleotidyltransferase 1 mitochondrial OS=Homo sapiens OX=9606 GN=PNPT1 PE=1 SV=2	Q8TCS8		PNPT1	170.27	120.74	161.46	377.3	178.23	305.33
1950	4448	O15460|P4HA2_HUMAN	213.42	60902	5	18	Prolyl 4-hydroxylase subunit alpha-2 OS=Homo sapiens OX=9606 GN=P4HA2 PE=1 SV=1	O15460		P4HA2	15.71	10.76	12.94	290.87	292.15	300.27
1930	3381	Q86U38|NOP9_HUMAN	200.29	69438	7	22	Nucleolar protein 9 OS=Homo sapiens OX=9606 GN=NOP9 PE=1 SV=1	Q86U38		NOP9	273.82	252.55	270.91	475.21	413.66	363.5
1780	3636	O95140|MFN2_HUMAN	196.11	86402	6	11	Mitofusin-2 OS=Homo sapiens OX=9606 GN=MFN2 PE=1 SV=3	O95140		MFN2	363.11	336.91	379.41	233.33	212.81	261.59
2629	6613	O75396|SC22B_HUMAN	157.99	24593	5	28	Vesicle-trafficking protein SEC22b OS=Homo sapiens OX=9606 GN=SEC22B PE=1 SV=4	O75396		SC22B	175.38	54.11	0	72.11	197.39	196.21
1264	3523	Q12972|PP1R8_HUMAN	225.66	38479	7	26	Nuclear inhibitor of protein phosphatase 1 OS=Homo sapiens OX=9606 GN=PPP1R8 PE=1 SV=2	Q12972		PP1R8	206.24	254.58	208.96	386.91	346.96	331.04
2047	3590	Q99816|TS101_HUMAN	183.87	43944	7	22	Tumor susceptibility gene 101 protein OS=Homo sapiens OX=9606 GN=TSG101 PE=1 SV=2	Q99816		TS101	367.2	302.42	346.44	462.4	370.36	374.44
1985	4341	Q9Y608|LRRF2_HUMAN	152.21	82171	3	7	Leucine-rich repeat flightless-interacting protein 2 OS=Homo sapiens OX=9606 GN=LRRFIP2 PE=1 SV=1	Q9Y608		LRRF2	105.86	49.33	123.26	217.88	189.2	264.91
2245	7872	P41212|ETV6_HUMAN	127.23	53000	2	8	Transcription factor ETV6 OS=Homo sapiens OX=9606 GN=ETV6 PE=1 SV=1	P41212		ETV6	19.04	31.47	0	241.86	221.95	294.82
1597	2377	Q92541|RTF1_HUMAN	213	80314	8	15	RNA polymerase-associated protein RTF1 homolog OS=Homo sapiens OX=9606 GN=RTF1 PE=1 SV=4	Q92541		RTF1	279.06	144.59	222.74	274.86	277.53	289.68
2346	5908	Q9ULX6|AKP8L_HUMAN	143.34	71640	3	7	A-kinase anchor protein 8-like OS=Homo sapiens OX=9606 GN=AKAP8L PE=1 SV=4	Q9ULX6		AKP8L	244.73	285.76	216.07	306.37	416.08	304.1
1217	2299	Q9NUU7|DD19A_HUMAN	249.76	53975	5	32	ATP-dependent RNA helicase DDX19A OS=Homo sapiens OX=9606 GN=DDX19A PE=1 SV=1	Q9NUU7		DD19A	232.96	169.7	333.84	360.37	132.14	287.37
1717	3793	Q9HC38-2|GLOD4_HUMAN	229.27	33233	9	34	Isoform 2 of Glyoxalase domain-containing protein 4 OS=Homo sapiens OX=9606 GN=GLOD4	Q9HC38	2	GLOD4	246.52	263.81	289.28	395.86	534.05	359.12
1768	4068	Q5JVF3-2|PCID2_HUMAN	208.6	45773	8	24	Isoform 2 of PCI domain-containing protein 2 OS=Homo sapiens OX=9606 GN=PCID2	Q5JVF3	2	PCID2	236.84	213.99	215.18	278.9	292.98	299.35
1995	3511	Q96CM8-2|ACSF2_HUMAN	193.86	70623	6	14	Isoform 2 of Medium-chain acyl-CoA ligase ACSF2 mitochondrial OS=Homo sapiens OX=9606 GN=ACSF2	Q96CM8	2	ACSF2	154.92	170.23	78.49	226.14	232.16	276.95
2635	4973	O95219|SNX4_HUMAN	155.85	51909	5	18	Sorting nexin-4 OS=Homo sapiens OX=9606 GN=SNX4 PE=1 SV=1	O95219		SNX4	98.27	160.41	0	315.01	260.02	288.85
2022	5899	Q08380|LG3BP_HUMAN	167.22	65331	4	9	Galectin-3-binding protein OS=Homo sapiens OX=9606 GN=LGALS3BP PE=1 SV=1	Q08380		LG3BP	163.32	128.62	119.76	238.59	225.06	280.53
1661	3296	Q16698|DECR_HUMAN	230.06	36068	6	38	2 4-dienoyl-CoA reductase mitochondrial OS=Homo sapiens OX=9606 GN=DECR1 PE=1 SV=1	Q16698		DECR	128.85	144.25	116.6	252.49	267.55	284.54
1438	4028	Q9NQ55|SSF1_HUMAN	184.15	53194	5	18	Suppressor of SWI4 1 homolog OS=Homo sapiens OX=9606 GN=PPAN PE=2 SV=1	Q9NQ55		SSF1	210.45	299.63	296.68	481.26	274.39	297.79
2013	2985	O60711|LPXN_HUMAN	230.17	43332	9	41	Leupaxin OS=Homo sapiens OX=9606 GN=LPXN PE=1 SV=1	O60711		LPXN	312.43	180.78	375.68	364.39	298.16	303.28
1583	2868	Q13642-5|FHL1_HUMAN	196.06	33579	6	28	Isoform 5 of Four and a half LIM domains protein 1 OS=Homo sapiens OX=9606 GN=FHL1	Q13642	5	FHL1	414.3	382.6	348.4	443.39	345.74	349.63
1376	4445	P46926|GNPI1_HUMAN	245.33	32669	9	56	Glucosamine-6-phosphate isomerase 1 OS=Homo sapiens OX=9606 GN=GNPDA1 PE=1 SV=1	P46926		GNPI1	312.01	744.06	509.33	979.92	633.15	510.6
2370	4720	Q9NVH2-3|INT7_HUMAN	205.23	104696	5	8	Isoform 3 of Integrator complex subunit 7 OS=Homo sapiens OX=9606 GN=INTS7	Q9NVH2	3	INT7	74.62	39.67	75.43	126.78	257.26	272.19
2126	2388	Q969S3|ZN622_HUMAN	206.1	54272	8	26	Zinc finger protein 622 OS=Homo sapiens OX=9606 GN=ZNF622 PE=1 SV=1	Q969S3		ZN622	281.73	247.25	310.52	168.93	134.6	234.69
2257	11186	Q96EL3|RM53_HUMAN	108.22	12107	1	16	39S ribosomal protein L53 mitochondrial OS=Homo sapiens OX=9606 GN=MRPL53 PE=1 SV=1	Q96EL3		RM53	195.51	191.51	151.96	234.93	164.98	282.75
2698	11923	Q96AT9-4|RPE_HUMAN	161.38	21739	3	27	Isoform 4 of Ribulose-phosphate 3-epimerase OS=Homo sapiens OX=9606 GN=RPE	Q96AT9	4	RPE	246.33	0	65.85	219.39	451.03	295.72
2488	6610	P09417-2|DHPR_HUMAN	165.11	22408	4	32	Isoform 2 of Dihydropteridine reductase OS=Homo sapiens OX=9606 GN=QDPR	P09417	2	DHPR	357.09	417.44	372.55	332.73	198.66	295.53
657	2170	P55795|HNRH2_HUMAN	289.12	49264	3	29	Heterogeneous nuclear ribonucleoprotein H2 OS=Homo sapiens OX=9606 GN=HNRNPH2 PE=1 SV=1	P55795		HNRH2	145.75	71.6	159.54	287.1	219.45	260.85
2950	7532	Q99757|THIOM_HUMAN	161.23	18383	3	25	Thioredoxin mitochondrial OS=Homo sapiens OX=9606 GN=TXN2 PE=1 SV=2	Q99757		THIOM	105.22	102.27	100.16	247.65	229.04	275.87
2176	4007	P41214|EIF2D_HUMAN	214.11	64707	7	20	Eukaryotic translation initiation factor 2D OS=Homo sapiens OX=9606 GN=EIF2D PE=1 SV=3	P41214		EIF2D	161.64	67.38	105.69	130.87	160.56	213.4
1373	2998	Q9NQR4|NIT2_HUMAN	200.09	30608	7	38	Omega-amidase NIT2 OS=Homo sapiens OX=9606 GN=NIT2 PE=1 SV=1	Q9NQR4		NIT2	375.98	261.56	238.52	209.85	270.49	255.41
1883	2499	Q14738|2A5D_HUMAN	188.11	69992	2	12	Serine/threonine-protein phosphatase 2A 56 kDa regulatory subunit delta isoform OS=Homo sapiens OX=9606 GN=PPP2R5D PE=1 SV=1	Q14738		2A5D	0	39.14	152.01	223.65	60.18	236.7
1339	2416	Q96CW5-2|GCP3_HUMAN	252.66	93885	10	21	Isoform 2 of Gamma-tubulin complex component 3 OS=Homo sapiens OX=9606 GN=TUBGCP3	Q96CW5	2	GCP3	241.37	242.02	206.43	636.27	338.1	310.96
1761	1920	Q9HAU0-2|PKHA5_HUMAN	207.29	134323	7	9	Isoform 2 of Pleckstrin homology domain-containing family A member 5 OS=Homo sapiens OX=9606 GN=PLEKHA5	Q9HAU0	2	PKHA5	262.33	238.92	84.42	163.73	249.07	255.91
2599	2750	Q8N3E9|PLCD3_HUMAN	190.13	89258	6	12	1-phosphatidylinositol 4 5-bisphosphate phosphodiesterase delta-3 OS=Homo sapiens OX=9606 GN=PLCD3 PE=1 SV=3	Q8N3E9		PLCD3	138.56	108.15	124.47	188.08	221.69	245.82
2526	5187	Q9NTZ6|RBM12_HUMAN	168.65	97396	5	7	RNA-binding protein 12 OS=Homo sapiens OX=9606 GN=RBM12 PE=1 SV=1	Q9NTZ6		RBM12	327.71	303.87	345.24	362.32	137.67	292.32
1777	2485	Q96PZ0-2|PUS7_HUMAN	232.27	75663	9	21	Isoform 2 of Pseudouridylate synthase 7 homolog OS=Homo sapiens OX=9606 GN=PUS7	Q96PZ0	2	PUS7	211.82	92.24	103.04	169.46	201.1	258.03
1813	4427	Q9NRV9|HEBP1_HUMAN	187.14	21097	5	44	Heme-binding protein 1 OS=Homo sapiens OX=9606 GN=HEBP1 PE=1 SV=1	Q9NRV9		HEBP1	332.15	138.53	343.8	230.65	99.52	227.88
2236	5735	O60749|SNX2_HUMAN	174.69	58471	4	10	Sorting nexin-2 OS=Homo sapiens OX=9606 GN=SNX2 PE=1 SV=2	O60749		SNX2	186.44	236.18	254.31	297.27	69.58	290.01
1683	3187	P78316|NOP14_HUMAN	213.59	97668	8	11	Nucleolar protein 14 OS=Homo sapiens OX=9606 GN=NOP14 PE=1 SV=3	P78316		NOP14	152.83	95.8	114.37	274.15	196.11	251.46
2589	7683	Q13572|ITPK1_HUMAN	173.95	45621	4	24	Inositol-tetrakisphosphate 1-kinase OS=Homo sapiens OX=9606 GN=ITPK1 PE=1 SV=2	Q13572		ITPK1	194.32	125.04	203.39	228.42	233.76	262.91
1072	2737	P17612|KAPCA_HUMAN	231.33	40590	5	23	cAMP-dependent protein kinase catalytic subunit alpha OS=Homo sapiens OX=9606 GN=PRKACA PE=1 SV=2	P17612		KAPCA	76.8	69.98	49.64	368.19	347.72	318.05
1560	2234	O00461|GOLI4_HUMAN	234.85	81880	8	14	Golgi integral membrane protein 4 OS=Homo sapiens OX=9606 GN=GOLIM4 PE=1 SV=1	O00461		GOLI4	172.51	216.61	299.19	326.8	219.1	263.58
2029	3280	Q9UHD2|TBK1_HUMAN	209.84	83642	5	11	Serine/threonine-protein kinase TBK1 OS=Homo sapiens OX=9606 GN=TBK1 PE=1 SV=1	Q9UHD2		TBK1	106.08	182.08	59.11	604.94	272.55	293.5
1485	2562	Q96RP9|EFGM_HUMAN	256.32	83472	13	27	Elongation factor G mitochondrial OS=Homo sapiens OX=9606 GN=GFM1 PE=1 SV=2	Q96RP9		EFGM	328.72	252.58	196.61	450.37	327.12	322.42
1706	10146	Q9NRX4|PHP14_HUMAN	140.79	13833	2	26	14 kDa phosphohistidine phosphatase OS=Homo sapiens OX=9606 GN=PHPT1 PE=1 SV=1	Q9NRX4		PHP14	197.13	165.05	128.25	260.85	244.09	279.68
1579	3630	Q9HCC0-2|MCCB_HUMAN	249.2	57519	8	27	Isoform 2 of Methylcrotonoyl-CoA carboxylase beta chain mitochondrial OS=Homo sapiens OX=9606 GN=MCCC2	Q9HCC0	2	MCCB	101.83	119.67	153.59	369.11	330.89	315.33
1432	6441	Q96FJ2|DYL2_HUMAN	160.59	10350	1	39	Dynein light chain 2 cytoplasmic OS=Homo sapiens OX=9606 GN=DYNLL2 PE=1 SV=1	Q96FJ2		DYL2	0	120.19	275.89	146.25	155.66	287.25
1987	3886	Q13247-3|SRSF6_HUMAN	177.38	38419	3	13	Isoform SRP55-3 of Serine/arginine-rich splicing factor 6 OS=Homo sapiens OX=9606 GN=SRSF6	Q13247	3	SRSF6	74.77	74.8	174.58	109.92	252.73	237.2
1655	3248	Q92599-4|SEPT8_HUMAN	212.16	51178	5	20	Isoform 4 of Septin-8 OS=Homo sapiens OX=9606 GN=SEPTIN8	Q92599	4	2008-09-01	319.09	251.84	323.3	299.39	172.6	282.07
3065	5928	Q5T9L3-2|WLS_HUMAN	141.48	62552	4	10	Isoform 2 of Protein wntless homolog OS=Homo sapiens OX=9606 GN=WLS	Q5T9L3	2	WLS	0	0	0	318	233.96	286.7
2252	24773	Q9NS69|TOM22_HUMAN	133.56	15522	3	34	Mitochondrial import receptor subunit TOM22 homolog OS=Homo sapiens OX=9606 GN=TOMM22 PE=1 SV=3	Q9NS69		TOM22	221.57	193.25	73.91	126.85	250.23	222.67
2027	4181	Q9P2T1|GMPR2_HUMAN	213.82	37874	6	27	GMP reductase 2 OS=Homo sapiens OX=9606 GN=GMPR2 PE=1 SV=1	Q9P2T1		GMPR2	227.91	231.84	243.24	322.94	158.63	286.15
1884	3749	Q15386|UBE3C_HUMAN	225.41	123923	7	11	Ubiquitin-protein ligase E3C OS=Homo sapiens OX=9606 GN=UBE3C PE=1 SV=3	Q15386		UBE3C	120.49	148.49	113.91	176.06	178.61	241.07
1757	4951	Q9UL15|BAG5_HUMAN	176.96	51200	6	20	BAG family molecular chaperone regulator 5 OS=Homo sapiens OX=9606 GN=BAG5 PE=1 SV=1	Q9UL15		BAG5	209.07	130.87	123.99	313.1	234.44	272.29
1766	3996	Q15061|WDR43_HUMAN	216.92	74891	7	20	WD repeat-containing protein 43 OS=Homo sapiens OX=9606 GN=WDR43 PE=1 SV=3	Q15061		WDR43	355.46	169.64	109.09	185.37	212.04	240.39
1857	4879	Q16762|THTR_HUMAN	190.71	33429	6	37	Thiosulfate sulfurtransferase OS=Homo sapiens OX=9606 GN=TST PE=1 SV=4	Q16762		THTR	118.25	43.25	49.9	240.57	208.43	275.87
1685	5657	P17096-2|HMGA1_HUMAN	103.06	10679	1	34	Isoform HMG-Y of High mobility group protein HMG-I/HMG-Y OS=Homo sapiens OX=9606 GN=HMGA1	P17096	2	HMGA1	464.05	600.2	588.64	197.22	504.04	284.76
1942	2522	P10586-2|PTPRF_HUMAN	206	211685	7	5	Isoform 2 of Receptor-type tyrosine-protein phosphatase F OS=Homo sapiens OX=9606 GN=PTPRF	P10586	2	PTPRF	131.9	37.11	46.17	219.04	281.19	254.11
1887	3902	P35813-3|PPM1A_HUMAN	175.84	51366	6	16	Isoform 3 of Protein phosphatase 1A OS=Homo sapiens OX=9606 GN=PPM1A	P35813	3	PPM1A	164.6	48.91	90.05	265.95	244.86	274.27
1622	5284	Q96IJ6|GMPPA_HUMAN	166.81	46291	4	15	Mannose-1-phosphate guanyltransferase alpha OS=Homo sapiens OX=9606 GN=GMPPA PE=1 SV=1	Q96IJ6		GMPPA	336.51	126.05	283.28	292.99	317.31	284.54
1787	3202	Q5T5P2|SKT_HUMAN	181.16	214114	5	4	Sickle tail protein homolog OS=Homo sapiens OX=9606 GN=KIAA1217 PE=1 SV=2	Q5T5P2		SKT	131.89	61.48	173.37	243.58	224.76	258.16
2256	3234	Q8NF37|PCAT1_HUMAN	182.7	59151	7	21	Lysophosphatidylcholine acyltransferase 1 OS=Homo sapiens OX=9606 GN=LPCAT1 PE=1 SV=2	Q8NF37		PCAT1	282.65	240.64	240.65	288.83	414.66	339.94
2203	3868	Q8NFV4|ABHDB_HUMAN	170.91	34690	6	38	Protein ABHD11 OS=Homo sapiens OX=9606 GN=ABHD11 PE=1 SV=1	Q8NFV4		ABHDB	31.74	43.57	143.82	240.68	163.07	251.21
1234	2094	O00425|IF2B3_HUMAN	259.8	63705	12	29	Insulin-like growth factor 2 mRNA-binding protein 3 OS=Homo sapiens OX=9606 GN=IGF2BP3 PE=1 SV=2	O00425		IF2B3	165.36	137.75	1468.09	139.81	107.47	223.19
2317	4865	Q8WXA9-2|SREK1_HUMAN	191.94	71650	6	16	Isoform 2 of Splicing regulatory glutamine/lysine-rich protein 1 OS=Homo sapiens OX=9606 GN=SREK1	Q8WXA9	2	SREK1	212.94	233.57	260.97	243.21	213.47	257
903	1806	P29692-3|EF1D_HUMAN	265.57	28558	1	49	Isoform 3 of Elongation factor 1-delta OS=Homo sapiens OX=9606 GN=EEF1D	P29692	3	EF1D	303.01	302.3	309.76	298.73	287.74	287.49
1687	7498	Q9UNE7|CHIP_HUMAN	185.22	34856	5	14	E3 ubiquitin-protein ligase CHIP OS=Homo sapiens OX=9606 GN=STUB1 PE=1 SV=2	Q9UNE7		CHIP	283.88	254.75	211.52	235.46	196.25	271.32
3850	33009	Q8TBQ9|KISHA_HUMAN	43.45	8060	1	12	Protein kish-A OS=Homo sapiens OX=9606 GN=TMEM167A PE=1 SV=1	Q8TBQ9		KISHA	249.16	126.75	0	135.09	127.76	268.5
2023	6372	Q99417|MYCBP_HUMAN	163.95	11967	4	48	c-Myc-binding protein OS=Homo sapiens OX=9606 GN=MYCBP PE=1 SV=3	Q99417		MYCBP	96.07	114.31	138.33	147.32	273.77	269.53
2237	4324	Q8WVV9-4|HNRLL_HUMAN	180.37	59648	4	11	Isoform 4 of Heterogeneous nuclear ribonucleoprotein L-like OS=Homo sapiens OX=9606 GN=HNRNPLL	Q8WVV9	4	HNRLL	223.68	223.82	247.95	297.29	279.22	280.99
1593	3129	Q01968-2|OCRL_HUMAN	211.64	103227	6	11	Isoform B of Inositol polyphosphate 5-phosphatase OCRL OS=Homo sapiens OX=9606 GN=OCRL	Q01968	2	OCRL	297.51	392.14	232.06	286.78	346.1	297.17
2217	3125	Q9NRY4|RHG35_HUMAN	192.92	170513	5	6	Rho GTPase-activating protein 35 OS=Homo sapiens OX=9606 GN=ARHGAP35 PE=1 SV=3	Q9NRY4		RHG35	168.94	73.17	119.46	200.66	289.31	265.98
1796	3840	Q96MU7-2|YTDC1_HUMAN	181.31	82692	6	14	Isoform 2 of YTH domain-containing protein 1 OS=Homo sapiens OX=9606 GN=YTHDC1	Q96MU7	2	YTDC1	179.31	190.34	294.24	294.92	175.37	271.9
1153	1174	P42285|MTREX_HUMAN	270.84	117805	21	28	Exosome RNA helicase MTR4 OS=Homo sapiens OX=9606 GN=MTREX PE=1 SV=3	P42285		MTREX	164.07	235.06	288.57	729.46	312.46	332.67
1124	1102	Q14669-2|TRIPC_HUMAN	250.79	223898	13	11	Isoform 2 of E3 ubiquitin-protein ligase TRIP12 OS=Homo sapiens OX=9606 GN=TRIP12	Q14669	2	TRIPC	297.75	297.97	306.57	395.67	341.04	304.22
795	602	P23634|AT2B4_HUMAN	328.66	137920	11	22	Plasma membrane calcium-transporting ATPase 4 OS=Homo sapiens OX=9606 GN=ATP2B4 PE=1 SV=2	P23634		AT2B4	227.07	218.25	178.21	304.56	199.01	279.74
1451	1957	Q9H583|HEAT1_HUMAN	235.37	242368	12	8	HEAT repeat-containing protein 1 OS=Homo sapiens OX=9606 GN=HEATR1 PE=1 SV=3	Q9H583		HEAT1	333.17	157.38	196.57	255.91	200.66	249.65
2972	6011	Q99442|SEC62_HUMAN	102.28	45862	2	6	Translocation protein SEC62 OS=Homo sapiens OX=9606 GN=SEC62 PE=1 SV=1	Q99442		SEC62	302.31	286.43	306	320.34	397.6	319.11
3063	4526	P46736|BRCC3_HUMAN	128.09	36072	4	19	Lys-63-specific deubiquitinase BRCC36 OS=Homo sapiens OX=9606 GN=BRCC3 PE=1 SV=2	P46736		BRCC3	99.74	73.64	100.9	90.52	101.31	230.1
1678	1567	Q9H078-2|CLPB_HUMAN	240.48	75449	10	21	Isoform 2 of Caseinolytic peptidase B protein homolog OS=Homo sapiens OX=9606 GN=CLPB	Q9H078	2	CLPB	142.97	33.78	75.56	132.6	209.3	238.31
2414	4218	Q9H9E3-3|COG4_HUMAN	177.38	81098	4	9	Isoform 3 of Conserved oligomeric Golgi complex subunit 4 OS=Homo sapiens OX=9606 GN=COG4	Q9H9E3	3	COG4	228.05	194.92	178.41	309.51	301.6	291.03
1202	1875	Q8NI36|WDR36_HUMAN	244.85	105322	9	15	WD repeat-containing protein 36 OS=Homo sapiens OX=9606 GN=WDR36 PE=1 SV=1	Q8NI36		WDR36	274.35	176.42	201.34	282.76	281.39	277.57
3316	9297	Q96AJ9-1|VTI1A_HUMAN	81.6	23435	1	13	Isoform 1 of Vesicle transport through interaction with t-SNAREs homolog 1A OS=Homo sapiens OX=9606 GN=VTI1A	Q96AJ9	1	VTI1A	40.65	67.83	0	85.46	72.32	181.74
1555	809	Q709C8|VP13C_HUMAN	272.62	422393	16	8	Vacuolar protein sorting-associated protein 13C OS=Homo sapiens OX=9606 GN=VPS13C PE=1 SV=1	Q709C8		VP13C	121.61	93.32	57.48	257.63	230.82	264.24
2938	8622	O95218-2|ZRAB2_HUMAN	91.74	36318	2	8	Isoform 2 of Zinc finger Ran-binding domain-containing protein 2 OS=Homo sapiens OX=9606 GN=ZRANB2	O95218	2	ZRAB2	201.91	65.02	230.07	471.94	173.14	277
1881	1958	Q9UDR5|AASS_HUMAN	246.1	102132	12	22	Alpha-aminoadipic semialdehyde synthase mitochondrial OS=Homo sapiens OX=9606 GN=AASS PE=1 SV=1	Q9UDR5		AASS	80.92	87.9	93.53	149.78	274.51	260.86
1495	1548	Q92973-2|TNPO1_HUMAN	225.49	101310	11	22	Isoform 2 of Transportin-1 OS=Homo sapiens OX=9606 GN=TNPO1	Q92973	2	TNPO1	199.13	80.68	287.48	211.92	281.35	275.1
1354	2251	Q9Y2U8|MAN1_HUMAN	271.28	99997	10	17	Inner nuclear membrane protein Man1 OS=Homo sapiens OX=9606 GN=LEMD3 PE=1 SV=2	Q9Y2U8		MAN1	283.39	251.2	335.56	286.73	344.6	275.22
3888	7501	Q96GG9|DCNL1_HUMAN	69.43	30124	2	7	DCN1-like protein 1 OS=Homo sapiens OX=9606 GN=DCUN1D1 PE=1 SV=1	Q96GG9		DCNL1	130	121.88	0	138.91	101.64	238.54
2343	17356	O75352-2|MPU1_HUMAN	111.83	19752	2	15	Isoform 2 of Mannose-P-dolichol utilization defect 1 protein OS=Homo sapiens OX=9606 GN=MPDU1	O75352	2	MPU1	66.24	68.23	63.87	36.65	184.6	218.27
2268	4829	P07686|HEXB_HUMAN	185.66	63111	6	21	Beta-hexosaminidase subunit beta OS=Homo sapiens OX=9606 GN=HEXB PE=1 SV=3	P07686		HEXB	210.72	172.62	168.58	126.5	288.79	273.18
2301	13490	Q10589|BST2_HUMAN	97.84	19769	1	8	Bone marrow stromal antigen 2 OS=Homo sapiens OX=9606 GN=BST2 PE=1 SV=1	Q10589		BST2	209.83	158.15	152.54	272.51	335.14	279.84
1710	4838	Q9Y6M1-1|IF2B2_HUMAN	207.7	61843	5	14	Isoform 2 of Insulin-like growth factor 2 mRNA-binding protein 2 OS=Homo sapiens OX=9606 GN=IGF2BP2	Q9Y6M1	1	IF2B2	201.39	223.44	161.3	278.51	295.68	276.15
2061	4775	Q9BY42|RTF2_HUMAN	176.6	33887	4	18	Replication termination factor 2 OS=Homo sapiens OX=9606 GN=RTF2 PE=1 SV=3	Q9BY42		RTF2	117.17	96.51	122.3	263.92	236.53	271.8
986	1047	P35658-5|NU214_HUMAN	307.98	215399	14	10	Isoform 5 of Nuclear pore complex protein Nup214 OS=Homo sapiens OX=9606 GN=NUP214	P35658	5	NU214	278.25	308.9	240.93	383.48	433.06	340.57
3048	6503	Q8TCT9-5|HM13_HUMAN	128.2	36814	3	14	Isoform 5 of Minor histocompatibility antigen H13 OS=Homo sapiens OX=9606 GN=HM13	Q8TCT9	5	HM13	403.94	366.96	371.57	202.43	233.15	271.94
2751	8616	Q9UKL0|RCOR1_HUMAN	162.84	53327	5	15	REST corepressor 1 OS=Homo sapiens OX=9606 GN=RCOR1 PE=1 SV=2	Q9UKL0		RCOR1	269.72	0	170.53	266.83	262.09	269.78
2261	5339	Q9UHV9|PFD2_HUMAN	159.43	16648	4	34	Prefoldin subunit 2 OS=Homo sapiens OX=9606 GN=PFDN2 PE=1 SV=1	Q9UHV9		PFD2	134.21	370.42	160.12	193.77	227.81	271.66
566	1185	Q10567-2|AP1B1_HUMAN	298.49	103921	7	25	Isoform B of AP-1 complex subunit beta-1 OS=Homo sapiens OX=9606 GN=AP1B1	Q10567	2	AP1B1	58.11	82.17	84.93	241.37	217.04	271.51
2225	4234	Q86X10-3|RLGPB_HUMAN	176.23	166527	8	10	Isoform 3 of Ral GTPase-activating protein subunit beta OS=Homo sapiens OX=9606 GN=RALGAPB	Q86X10	3	RLGPB	158.56	196.49	227.09	270.32	222.1	270.22
1351	3254	Q05209|PTN12_HUMAN	254.91	88106	10	20	Tyrosine-protein phosphatase non-receptor type 12 OS=Homo sapiens OX=9606 GN=PTPN12 PE=1 SV=3	Q05209		PTN12	293.31	330.14	322.67	372.34	356.89	318.14
2190	6925	Q8TBF2|PXL2B_HUMAN	129.78	21223	2	15	Prostamide/prostaglandin F synthase OS=Homo sapiens OX=9606 GN=PRXL2B PE=1 SV=1	Q8TBF2		PXL2B	141.81	83.19	114.02	157.61	149.45	223.89
2797	10014	A5PLL7|TM189_HUMAN	125.5	31135	2	13	Plasmanylethanolamine desaturase OS=Homo sapiens OX=9606 GN=TMEM189 PE=1 SV=3	A5PLL7		TM189	0	0	0	146.55	111.07	246.15
2045	3628	Q9GZT8|NIF3L_HUMAN	185.32	41968	6	25	NIF3-like protein 1 OS=Homo sapiens OX=9606 GN=NIF3L1 PE=1 SV=2	Q9GZT8		NIF3L	302.04	225.07	243.08	248.82	305.32	269.87
1851	4306	Q8NB90|AFG2H_HUMAN	191.1	97904	5	11	ATPase family protein 2 homolog OS=Homo sapiens OX=9606 GN=SPATA5 PE=1 SV=3	Q8NB90		AFG2H	144.54	95.37	197.17	212.16	169.97	245.03
3178	7833	Q8IUI8-2|CRLF3_HUMAN	121.78	49350	2	11	Isoform 2 of Cytokine receptor-like factor 3 OS=Homo sapiens OX=9606 GN=CRLF3	Q8IUI8	2	CRLF3	242.53	203.57	237.7	98.14	134.76	208.22
2229	5522	Q6UXN9|WDR82_HUMAN	191.5	35079	4	19	WD repeat-containing protein 82 OS=Homo sapiens OX=9606 GN=WDR82 PE=1 SV=1	Q6UXN9		WDR82	90.9	82.39	124.43	189.18	232.17	237.71
1558	3024	Q06787-5|FMR1_HUMAN	256.72	68455	8	22	Isoform 4 of Synaptic functional regulator FMR1 OS=Homo sapiens OX=9606 GN=FMR1	Q06787	5	FMR1	168.68	163.81	145.41	211.16	194.58	239.95
2473	5355	Q9H0P0-1|5NT3A_HUMAN	165.22	33915	5	19	Isoform 1 of Cytosolic 5'-nucleotidase 3A OS=Homo sapiens OX=9606 GN=NT5C3A	Q9H0P0	1	5NT3A	286.25	321.13	409.84	290.66	283.94	276.39
2825	13766	Q969H8|MYDGF_HUMAN	93.84	18795	1	9	Myeloid-derived growth factor OS=Homo sapiens OX=9606 GN=MYDGF PE=1 SV=1	Q969H8		MYDGF	338.53	364.56	352.35	270.89	273.6	267.04
2827	4332	Q86UK7-2|ZN598_HUMAN	110.06	97806	2	4	Isoform 2 of E3 ubiquitin-protein ligase ZNF598 OS=Homo sapiens OX=9606 GN=ZNF598	Q86UK7	2	ZN598	197.6	58.98	13.31	191.5	90.86	225.6
2713	5995	O43670-2|ZN207_HUMAN	178.22	49692	4	14	Isoform 2 of BUB3-interacting and GLEBS motif-containing protein ZNF207 OS=Homo sapiens OX=9606 GN=ZNF207	O43670	2	ZN207	304.69	356.07	157.68	170.3	179.35	265.79
1235	872	Q8TDB6|DTX3L_HUMAN	255.05	83554	14	29	E3 ubiquitin-protein ligase DTX3L OS=Homo sapiens OX=9606 GN=DTX3L PE=1 SV=1	Q8TDB6		DTX3L	763.34	715.05	892.68	320.94	241.4	264.76
2051	7087	P21926|CD9_HUMAN	156.12	25416	4	25	CD9 antigen OS=Homo sapiens OX=9606 GN=CD9 PE=1 SV=4	P21926		CD9	241.73	363.25	434.97	710.82	392.09	338.2
1731	4244	Q6P597-2|KLC3_HUMAN	222.2	55236	8	25	Isoform 2 of Kinesin light chain 3 OS=Homo sapiens OX=9606 GN=KLC3	Q6P597	2	KLC3	159.36	126.38	196.24	310.75	297.14	275.65
610	4496	Q9Y281|COF2_HUMAN	227.68	18737	3	46	Cofilin-2 OS=Homo sapiens OX=9606 GN=CFL2 PE=1 SV=1	Q9Y281		COF2	286.35	211.24	191.92	211.84	278.9	263.94
1640	3102	P28331|NDUS1_HUMAN	237.56	79468	9	21	NADH-ubiquinone oxidoreductase 75 kDa subunit mitochondrial OS=Homo sapiens OX=9606 GN=NDUFS1 PE=1 SV=3	P28331		NDUS1	59.81	64	70.78	344.17	299.43	295.18
3616	4371	Q16204|CCDC6_HUMAN	113.12	53291	3	11	Coiled-coil domain-containing protein 6 OS=Homo sapiens OX=9606 GN=CCDC6 PE=1 SV=2	Q16204		CCDC6	36.03	0	0	150.81	290.86	273.14
2798	24769	Q7Z4W1|DCXR_HUMAN	123.29	25913	2	10	L-xylulose reductase OS=Homo sapiens OX=9606 GN=DCXR PE=1 SV=2	Q7Z4W1		DCXR	143.63	57.73	141.45	231.1	107.29	240.54
2459	5981	Q92504|S39A7_HUMAN	164.77	50118	3	12	Zinc transporter SLC39A7 OS=Homo sapiens OX=9606 GN=SLC39A7 PE=1 SV=2	Q92504		S39A7	266.52	431.29	300.74	260.63	84.13	258.05
2392	3366	O75976|CBPD_HUMAN	180.29	152931	7	7	Carboxypeptidase D OS=Homo sapiens OX=9606 GN=CPD PE=1 SV=2	O75976		CBPD	0	0	0	144.2	115.52	205.84
1272	2743	P49419-2|AL7A1_HUMAN	251.18	55366	10	37	Isoform 2 of Alpha-aminoadipic semialdehyde dehydrogenase OS=Homo sapiens OX=9606 GN=ALDH7A1	P49419	2	AL7A1	194.93	227	486.47	197.12	174.85	243.13
1574	5479	P28072|PSB6_HUMAN	187.51	25358	5	53	Proteasome subunit beta type-6 OS=Homo sapiens OX=9606 GN=PSMB6 PE=1 SV=4	P28072		PSB6	365.2	302.56	460.73	404.23	380.8	323.06
2062	5346	Q13011|ECH1_HUMAN	158.39	35816	5	20	Delta(3 5)-Delta(2 4)-dienoyl-CoA isomerase mitochondrial OS=Homo sapiens OX=9606 GN=ECH1 PE=1 SV=2	Q13011		ECH1	128.18	106.79	132.53	348.1	243.48	292.81
2149	2215	Q8N201|INT1_HUMAN	215.37	244295	10	7	Integrator complex subunit 1 OS=Homo sapiens OX=9606 GN=INTS1 PE=1 SV=2	Q8N201		INT1	147.28	141.38	118.54	175.65	168.87	231.17
1220	3285	O43815|STRN_HUMAN	214.25	86132	6	15	Striatin OS=Homo sapiens OX=9606 GN=STRN PE=1 SV=4	O43815		STRN	288.43	351.66	248.95	534.04	382.13	347.71
1316	3548	P25789|PSA4_HUMAN	218.22	29484	9	54	Proteasome subunit alpha type-4 OS=Homo sapiens OX=9606 GN=PSMA4 PE=1 SV=1	P25789		PSA4	1381.7	914.15	808.25	736.77	283.84	309.31
2033	4993	Q9Y3D9|RT23_HUMAN	175.5	21771	6	46	28S ribosomal protein S23 mitochondrial OS=Homo sapiens OX=9606 GN=MRPS23 PE=1 SV=2	Q9Y3D9		RT23	85.61	22.7	12.68	155.82	152.57	241.46
1383	2863	P20936-4|RASA1_HUMAN	241.35	101546	6	11	Isoform 4 of Ras GTPase-activating protein 1 OS=Homo sapiens OX=9606 GN=RASA1	P20936	4	RASA1	425.56	399.36	399.21	449.93	380.73	326.85
2223	8275	Q9BTZ2-8|DHRS4_HUMAN	126.56	23917	2	6	Isoform 8 of Dehydrogenase/reductase SDR family member 4 OS=Homo sapiens OX=9606 GN=DHRS4	Q9BTZ2	8	DHRS4	157.1	103.41	242.65	267.22	326.71	264.49
1406	1468	Q9Y4G6|TLN2_HUMAN	274.85	271611	11	10	Talin-2 OS=Homo sapiens OX=9606 GN=TLN2 PE=1 SV=4	Q9Y4G6		TLN2	228.46	53.03	177.73	269.19	177.5	252.88
1099	1190	Q9NVI7-2|ATD3A_HUMAN	255.29	66218	7	29	Isoform 2 of ATPase family AAA domain-containing protein 3A OS=Homo sapiens OX=9606 GN=ATAD3A	Q9NVI7	2	ATD3A	261.78	238.85	212.08	493.48	184.96	236.58
2644	8885	Q96RD7|PANX1_HUMAN	74.5	48050	1	3	Pannexin-1 OS=Homo sapiens OX=9606 GN=PANX1 PE=1 SV=4	Q96RD7		PANX1	156.61	186.57	143.46	236.09	208.79	247.63
1925	4624	Q9Y2R4|DDX52_HUMAN	193.9	67498	6	18	Probable ATP-dependent RNA helicase DDX52 OS=Homo sapiens OX=9606 GN=DDX52 PE=1 SV=3	Q9Y2R4		DDX52	209.87	307.08	194.98	246.68	187.54	233.13
3281	8242	Q14197|ICT1_HUMAN	96.65	23630	2	10	Peptidyl-tRNA hydrolase ICT1 mitochondrial OS=Homo sapiens OX=9606 GN=MRPL58 PE=1 SV=1	Q14197		ICT1	123.27	128.61	140.71	355.41	123.47	259.08
691	1020	O43432-4|IF4G3_HUMAN	270.65	146870	7	12	Isoform 4 of Eukaryotic translation initiation factor 4 gamma 3 OS=Homo sapiens OX=9606 GN=EIF4G3	O43432	4	IF4G3	135.64	152.51	237.2	190.29	194.02	241.29
2211	4508	Q15435|PP1R7_HUMAN	210.65	41564	6	28	Protein phosphatase 1 regulatory subunit 7 OS=Homo sapiens OX=9606 GN=PPP1R7 PE=1 SV=1	Q15435		PP1R7	177.78	136.26	189.18	196.97	274.81	250.8
1460	3439	Q9P289-2|STK26_HUMAN	238.25	37770	4	26	Isoform 2 of Serine/threonine-protein kinase 26 OS=Homo sapiens OX=9606 GN=STK26	Q9P289	2	STK26	279.08	113.69	72.38	205.19	91.37	210.63
3099	3967	O14777|NDC80_HUMAN	144.98	73913	4	10	Kinetochore protein NDC80 homolog OS=Homo sapiens OX=9606 GN=NDC80 PE=1 SV=1	O14777		NDC80	118.43	116.63	0	115.31	125.32	190.13
605	3198	P63096|GNAI1_HUMAN	260.27	40361	3	24	Guanine nucleotide-binding protein G(i) subunit alpha-1 OS=Homo sapiens OX=9606 GN=GNAI1 PE=1 SV=2	P63096		GNAI1	249.01	457.47	126.14	365.79	183.91	291.59
1650	4506	Q13442|HAP28_HUMAN	181.57	20630	5	30	28 kDa heat- and acid-stable phosphoprotein OS=Homo sapiens OX=9606 GN=PDAP1 PE=1 SV=1	Q13442		HAP28	581.87	95.87	292.26	547.12	433.62	372.74
2286	3298	Q2NL82|TSR1_HUMAN	204.78	91810	10	17	Pre-rRNA-processing protein TSR1 homolog OS=Homo sapiens OX=9606 GN=TSR1 PE=1 SV=1	Q2NL82		TSR1	207.07	205.56	92.83	222.12	187.98	233.6
1936	4175	Q969N2-5|PIGT_HUMAN	179.32	59582	5	13	Isoform 5 of GPI transamidase component PIG-T OS=Homo sapiens OX=9606 GN=PIGT	Q969N2	5	PIGT	123.36	55.81	81.99	400.32	421.83	332.81
2540	4524	P20073-2|ANXA7_HUMAN	169.61	50316	6	18	Isoform 2 of Annexin A7 OS=Homo sapiens OX=9606 GN=ANXA7	P20073	2	ANXA7	468.52	228.09	501.33	267.32	243.8	253.07
1847	1917	Q9NZT2-2|OGFR_HUMAN	234.96	71424	8	22	Isoform 2 of Opioid growth factor receptor OS=Homo sapiens OX=9606 GN=OGFR	Q9NZT2	2	OGFR	272.06	231.34	195.89	62.36	256.71	244.81
2562	7395	Q9UNN8|EPCR_HUMAN	120.22	26671	2	11	Endothelial protein C receptor OS=Homo sapiens OX=9606 GN=PROCR PE=1 SV=1	Q9UNN8		EPCR	149.88	134.23	77	174.96	220.93	237.69
2559	5918	O43617|TPPC3_HUMAN	148.62	20274	3	27	Trafficking protein particle complex subunit 3 OS=Homo sapiens OX=9606 GN=TRAPPC3 PE=1 SV=1	O43617		TPPC3	51.39	79.2	153	141.33	133.73	254.96
1659	2607	P48059-3|LIMS1_HUMAN	224.42	44390	9	32	Isoform 3 of LIM and senescent cell antigen-like-containing domain protein 1 OS=Homo sapiens OX=9606 GN=LIMS1	P48059	3	LIMS1	145.92	174.6	122.92	217.26	142.93	236.18
1754	2440	Q15003|CND2_HUMAN	199.53	82563	7	16	Condensin complex subunit 2 OS=Homo sapiens OX=9606 GN=NCAPH PE=1 SV=3	Q15003		CND2	228.12	121.76	198.09	178.51	270.79	250.13
2191	6514	Q96EL2|RT24_HUMAN	163.41	19015	2	23	28S ribosomal protein S24 mitochondrial OS=Homo sapiens OX=9606 GN=MRPS24 PE=1 SV=1	Q96EL2		RT24	94.07	16.63	16.24	130.51	215.41	205.84
1664	7070	O00442|RTCA_HUMAN	153.12	39337	3	11	RNA 3'-terminal phosphate cyclase OS=Homo sapiens OX=9606 GN=RTCA PE=1 SV=1	O00442		RTCA	252.85	338.98	299	245.23	236.24	250.22
1811	3429	Q9Y4X5|ARI1_HUMAN	214.71	64118	7	14	E3 ubiquitin-protein ligase ARIH1 OS=Homo sapiens OX=9606 GN=ARIH1 PE=1 SV=2	Q9Y4X5		ARI1	183.89	151.03	194.15	183.75	200.8	225.24
1552	3884	O95479|G6PE_HUMAN	208.08	88893	7	13	GDH/6PGL endoplasmic bifunctional protein OS=Homo sapiens OX=9606 GN=H6PD PE=1 SV=2	O95479		G6PE	208.94	283.34	325.57	579.32	267.99	319.5
3080	12793	Q14318-2|FKBP8_HUMAN	166.6	44649	3	11	Isoform 2 of Peptidyl-prolyl cis-trans isomerase FKBP8 OS=Homo sapiens OX=9606 GN=FKBP8	Q14318	2	FKBP8	153.82	236.07	0	0	136.94	126.23
1728	2629	Q9H3D4-10|P63_HUMAN	220.72	56750	9	23	Isoform 10 of Tumor protein 63 OS=Homo sapiens OX=9606 GN=TP63	Q9H3D4	10	P63	46.06	0	0	147.83	243.15	226.99
2285	3451	Q8NCN5|PDPR_HUMAN	196.4	99364	10	19	Pyruvate dehydrogenase phosphatase regulatory subunit mitochondrial OS=Homo sapiens OX=9606 GN=PDPR PE=1 SV=2	Q8NCN5		PDPR	83.7	63.32	15.51	212.05	152.95	242.03
2296	5374	Q92522|H1X_HUMAN	160.19	22487	4	23	Histone H1.10 OS=Homo sapiens OX=9606 GN=H1-10 PE=1 SV=1	Q92522		H1X	384.98	413.65	413.19	121.84	249.24	247.4
3214	9754	P62070|RRAS2_HUMAN	118.59	23400	2	13	Ras-related protein R-Ras2 OS=Homo sapiens OX=9606 GN=RRAS2 PE=1 SV=1	P62070		RRAS2	245.23	258.42	264.86	279.1	247.94	252.92
1871	2420	Q9BXB4|OSB11_HUMAN	204.87	83643	6	13	Oxysterol-binding protein-related protein 11 OS=Homo sapiens OX=9606 GN=OSBPL11 PE=1 SV=2	Q9BXB4		OSB11	139.17	123.99	170.1	185.78	158.17	231.17
2620	5769	Q9BYD2|RM09_HUMAN	169.52	30243	3	15	39S ribosomal protein L9 mitochondrial OS=Homo sapiens OX=9606 GN=MRPL9 PE=1 SV=2	Q9BYD2		RM09	102.76	105.9	96.56	243.55	239.15	247.54
3200	6938	Q13427|PPIG_HUMAN	113.5	88617	3	4	Peptidyl-prolyl cis-trans isomerase G OS=Homo sapiens OX=9606 GN=PPIG PE=1 SV=2	Q13427		PPIG	91.54	108.12	0	0	71.68	124.9
2031	4603	Q9Y223-2|GLCNE_HUMAN	183.28	83066	4	8	Isoform 2 of Bifunctional UDP-N-acetylglucosamine 2-epimerase/N-acetylmannosamine kinase OS=Homo sapiens OX=9606 GN=GNE	Q9Y223	2	GLCNE	272.64	187.06	160.95	295.97	267.64	258.1
1798	5133	P28070|PSB4_HUMAN	211.62	29204	5	32	Proteasome subunit beta type-4 OS=Homo sapiens OX=9606 GN=PSMB4 PE=1 SV=4	P28070		PSB4	151.6	177.64	104.72	310.23	292.88	257.05
2749	7888	Q8NBU5|ATAD1_HUMAN	102.56	40744	2	7	ATPase family AAA domain-containing protein 1 OS=Homo sapiens OX=9606 GN=ATAD1 PE=1 SV=1	Q8NBU5		ATAD1	223.45	171.13	224.18	222.56	172.71	234.39
1462	1687	Q9BZF1-3|OSBL8_HUMAN	230.62	96956	11	19	Isoform 3 of Oxysterol-binding protein-related protein 8 OS=Homo sapiens OX=9606 GN=OSBPL8	Q9BZF1	3	OSBL8	302.71	250.19	222.88	223.49	203.05	233.42
2432	5202	Q8N2K0-2|ABD12_HUMAN	184.23	45558	5	20	Isoform 2 of Lysophosphatidylserine lipase ABHD12 OS=Homo sapiens OX=9606 GN=ABHD12	Q8N2K0	2	ABD12	254.02	114.15	251.76	307.8	239.61	254.88
1542	2814	P28290-2|ITPI2_HUMAN	223.22	121454	9	14	Isoform 2 of Protein ITPRID2 OS=Homo sapiens OX=9606 GN=ITPRID2	P28290	2	ITPI2	152.97	194.33	201.86	218.79	257.95	251.52
3186	15496	O00193|SMAP_HUMAN	108.78	20333	2	13	Small acidic protein OS=Homo sapiens OX=9606 GN=SMAP PE=1 SV=1	O00193		SMAP	157.72	155.89	146.79	212.98	185.69	217.94
3092	32936	Q9NX24|NHP2_HUMAN	95.61	17201	2	29	H/ACA ribonucleoprotein complex subunit 2 OS=Homo sapiens OX=9606 GN=NHP2 PE=1 SV=1	Q9NX24		NHP2	223.49	245.32	286.87	282.81	234.9	246.94
2177	5038	P15927-3|RFA2_HUMAN	175.45	38810	5	28	Isoform 3 of Replication protein A 32 kDa subunit OS=Homo sapiens OX=9606 GN=RPA2	P15927	3	RFA2	161.76	233.82	146.35	288.28	283.55	254.5
2495	12906	Q5TDH0|DDI2_HUMAN	135.29	44523	3	14	Protein DDI1 homolog 2 OS=Homo sapiens OX=9606 GN=DDI2 PE=1 SV=1	Q5TDH0		DDI2	227.86	248.8	235.72	293.67	298.9	268.46
2969	6554	Q15036|SNX17_HUMAN	135.72	52901	2	7	Sorting nexin-17 OS=Homo sapiens OX=9606 GN=SNX17 PE=1 SV=1	Q15036		SNX17	14.38	24	138.17	55.14	110.48	154.15
2152	3857	O14639-4|ABLM1_HUMAN	199.49	46087	6	21	Isoform 4 of Actin-binding LIM protein 1 OS=Homo sapiens OX=9606 GN=ABLIM1	O14639	4	ABLM1	228.56	137.22	177.74	181.51	311.69	240
1594	3136	P46934-2|NEDD4_HUMAN	198.15	147383	8	9	Isoform 2 of E3 ubiquitin-protein ligase NEDD4 OS=Homo sapiens OX=9606 GN=NEDD4	P46934	2	NEDD4	258.06	79.25	149.36	164.71	142.04	200.27
2167	6217	Q96RQ1|ERGI2_HUMAN	172.83	42549	4	18	Endoplasmic reticulum-Golgi intermediate compartment protein 2 OS=Homo sapiens OX=9606 GN=ERGIC2 PE=1 SV=2	Q96RQ1		ERGI2	142.98	185.98	178.73	240.06	210.94	240.36
1148	1372	Q7Z478|DHX29_HUMAN	273.77	155235	13	14	ATP-dependent RNA helicase DHX29 OS=Homo sapiens OX=9606 GN=DHX29 PE=1 SV=2	Q7Z478		DHX29	393.5	331.94	259.68	538.47	317.1	326.67
2450	3695	Q96JB5-4|CK5P3_HUMAN	159.33	59589	5	14	Isoform 4 of CDK5 regulatory subunit-associated protein 3 OS=Homo sapiens OX=9606 GN=CDK5RAP3	Q96JB5	4	CK5P3	213.57	256.56	133.66	316.28	379.13	269.19
2132	5636	Q9NRG9|AAAS_HUMAN	175.83	59574	4	15	Aladin OS=Homo sapiens OX=9606 GN=AAAS PE=1 SV=1	Q9NRG9		AAAS	166.32	51.77	55.49	101.54	182.87	203.42
3347	17872	E9PRG8|CK098_HUMAN	79.22	14234	1	11	Uncharacterized protein C11orf98 OS=Homo sapiens OX=9606 GN=C11orf98 PE=4 SV=2	E9PRG8		CK098	286.82	278.26	277.17	224.72	247.39	244.12
3639	6584	P49207|RL34_HUMAN	88.24	13293	3	24	60S ribosomal protein L34 OS=Homo sapiens OX=9606 GN=RPL34 PE=1 SV=3	P49207		RL34	182	997.6	0	513.15	242.06	244.56
2499	3492	Q8NDI1-3|EHBP1_HUMAN	152.86	132322	4	6	Isoform 3 of EH domain-binding protein 1 OS=Homo sapiens OX=9606 GN=EHBP1	Q8NDI1	3	EHBP1	224.32	92.74	305.19	188.58	272.47	250.53
1430	4710	Q9H553|ALG2_HUMAN	198.26	47092	6	19	Alpha-1 3/1 6-mannosyltransferase ALG2 OS=Homo sapiens OX=9606 GN=ALG2 PE=1 SV=1	Q9H553		ALG2	238.08	399.1	270.46	321.93	366.66	255.56
2090	3487	Q96CT7|CC124_HUMAN	163.13	25835	6	28	Coiled-coil domain-containing protein 124 OS=Homo sapiens OX=9606 GN=CCDC124 PE=1 SV=1	Q96CT7		CC124	219.45	350.81	292.93	347.44	314.32	288
1769	5916	Q9NRX1|PNO1_HUMAN	192.86	27924	4	23	RNA-binding protein PNO1 OS=Homo sapiens OX=9606 GN=PNO1 PE=1 SV=1	Q9NRX1		PNO1	398.25	252.95	178.46	320.01	190.33	243.23
1340	2907	Q9UBE0|SAE1_HUMAN	211.46	38450	8	39	SUMO-activating enzyme subunit 1 OS=Homo sapiens OX=9606 GN=SAE1 PE=1 SV=1	Q9UBE0		SAE1	478.48	747.61	595.67	535.07	965.81	384.25
2664	6407	P60520|GBRL2_HUMAN	131.38	13667	3	32	Gamma-aminobutyric acid receptor-associated protein-like 2 OS=Homo sapiens OX=9606 GN=GABARAPL2 PE=1 SV=1	P60520		GBRL2	178.34	193.07	175.19	243.78	264.09	242.84
2981	10645	O15126|SCAM1_HUMAN	146.18	37920	3	18	Secretory carrier-associated membrane protein 1 OS=Homo sapiens OX=9606 GN=SCAMP1 PE=1 SV=2	O15126		SCAM1	116.05	248.74	235.94	134.88	257.98	248.34
1722	5465	Q13057|COASY_HUMAN	215.11	62329	7	27	Bifunctional coenzyme A synthase OS=Homo sapiens OX=9606 GN=COASY PE=1 SV=4	Q13057		COASY	157.91	171.73	229.51	344.49	242.67	247.87
2632	7720	Q14254|FLOT2_HUMAN	143.11	47064	2	7	Flotillin-2 OS=Homo sapiens OX=9606 GN=FLOT2 PE=1 SV=2	Q14254		FLOT2	51.66	140.8	171.99	214.63	243.9	242.06
2239	4249	Q9BSH4|TACO1_HUMAN	167.42	32477	3	18	Translational activator of cytochrome c oxidase 1 OS=Homo sapiens OX=9606 GN=TACO1 PE=1 SV=1	Q9BSH4		TACO1	189.92	124.45	178.51	134.16	136.68	222.8
2201	4437	Q8TAE8|G45IP_HUMAN	140.32	25384	4	21	Growth arrest and DNA damage-inducible proteins-interacting protein 1 OS=Homo sapiens OX=9606 GN=GADD45GIP1 PE=1 SV=1	Q8TAE8		G45IP	120.92	129.63	105.29	333.73	228.82	241.73
3219	7930	Q9BVL2-3|NUP58_HUMAN	105.26	59754	1	3	Isoform 3 of Nucleoporin p58/p45 OS=Homo sapiens OX=9606 GN=NUP58	Q9BVL2	3	NUP58	90.76	107.17	125.8	234.99	4.42	236.9
2367	3872	Q7Z5K2|WAPL_HUMAN	155.99	132945	5	7	Wings apart-like protein homolog OS=Homo sapiens OX=9606 GN=WAPL PE=1 SV=1	Q7Z5K2		WAPL	65.02	102	62.53	141.49	166.15	200.41
1786	3679	P53597|SUCA_HUMAN	197.2	36250	7	30	Succinate--CoA ligase [ADP/GDP-forming] subunit alpha mitochondrial OS=Homo sapiens OX=9606 GN=SUCLG1 PE=1 SV=4	P53597		SUCA	362.71	248.89	288.65	311.19	344.9	251.44
620	691	Q13045|FLII_HUMAN	332.29	144751	3	27	Protein flightless-1 homolog OS=Homo sapiens OX=9606 GN=FLII PE=1 SV=2	Q13045		FLII	217.54	13.02	270.44	221.34	265.03	238.67
2406	6538	Q9NPF4|OSGEP_HUMAN	139.7	36427	2	13	Probable tRNA N6-adenosine threonylcarbamoyltransferase OS=Homo sapiens OX=9606 GN=OSGEP PE=1 SV=1	Q9NPF4		OSGEP	112.65	0	71.54	225.78	120.95	234.95
960	1194	Q7KZI7-14|MARK2_HUMAN	286.72	83113	7	23	Isoform 14 of Serine/threonine-protein kinase MARK2 OS=Homo sapiens OX=9606 GN=MARK2	Q7KZI7	14	MARK2	163.28	138.75	146.87	131.52	104.81	181.94
2200	2328	Q12959-5|DLG1_HUMAN	199.28	95166	8	16	Isoform 5 of Disks large homolog 1 OS=Homo sapiens OX=9606 GN=DLG1	Q12959	5	DLG1	186.43	213.59	259.28	358.35	131.34	238.31
1828	1407	Q8IZH2-2|XRN1_HUMAN	247.67	192842	9	10	Isoform 2 of 5'-3' exoribonuclease 1 OS=Homo sapiens OX=9606 GN=XRN1	Q8IZH2	2	XRN1	78.86	103.13	197.95	143.56	206.9	197.73
1762	4173	Q9NW13|RBM28_HUMAN	167.7	85738	5	8	RNA-binding protein 28 OS=Homo sapiens OX=9606 GN=RBM28 PE=1 SV=3	Q9NW13		RBM28	64.34	55.42	96.01	186.81	143.18	234.93
1452	1723	Q99570|PI3R4_HUMAN	237.44	153103	9	11	Phosphoinositide 3-kinase regulatory subunit 4 OS=Homo sapiens OX=9606 GN=PIK3R4 PE=1 SV=3	Q99570		PI3R4	235.96	171.91	202.9	306.77	282.51	268.5
1790	1944	P52789|HXK2_HUMAN	195.59	102380	5	9	Hexokinase-2 OS=Homo sapiens OX=9606 GN=HK2 PE=1 SV=2	P52789		HXK2	501.71	380.29	336.02	143.95	243.18	234.03
1580	4571	Q6NUQ4|TM214_HUMAN	156.22	77151	4	10	Transmembrane protein 214 OS=Homo sapiens OX=9606 GN=TMEM214 PE=1 SV=2	Q6NUQ4		TM214	155.63	125.85	137.14	205.9	138.75	201.42
2007	3140	Q9H269|VPS16_HUMAN	245.73	94694	7	18	Vacuolar protein sorting-associated protein 16 homolog OS=Homo sapiens OX=9606 GN=VPS16 PE=1 SV=2	Q9H269		VPS16	131.04	135.31	138.64	380.86	234.86	269.29
1863	3585	Q92696|PGTA_HUMAN	239.23	65072	6	23	Geranylgeranyl transferase type-2 subunit alpha OS=Homo sapiens OX=9606 GN=RABGGTA PE=1 SV=2	Q92696		PGTA	55.88	145.38	123.03	354.9	177.28	236.26
3411	18388	P84101-4|SERF2_HUMAN	82.91	5216	2	24	Isoform 4 of Small EDRK-rich factor 2 OS=Homo sapiens OX=9606 GN=SERF2	P84101	4	SERF2	0	0	805.4	0	151.74	118.13
1638	2658	O95793-3|STAU1_HUMAN	234.74	55635	13	42	Isoform 3 of Double-stranded RNA-binding protein Staufen homolog 1 OS=Homo sapiens OX=9606 GN=STAU1	O95793	3	STAU1	291.94	168.15	192.67	429.71	340.26	288.46
3234	11284	P22223|CADH3_HUMAN	110.96	91418	1	3	Cadherin-3 OS=Homo sapiens OX=9606 GN=CDH3 PE=1 SV=2	P22223		CADH3	112.91	0	0	0	106.09	117.64
2218	3833	Q86X29-6|LSR_HUMAN	177.22	54498	4	14	Isoform 6 of Lipolysis-stimulated lipoprotein receptor OS=Homo sapiens OX=9606 GN=LSR	Q86X29	6	LSR	315.92	317.21	183.87	144	199.76	228.75
2304	4709	O60879|DIAP2_HUMAN	140.55	125569	3	5	Protein diaphanous homolog 2 OS=Homo sapiens OX=9606 GN=DIAPH2 PE=1 SV=1	O60879		DIAP2	73.94	140.35	98.76	185.6	68.82	188.5
1725	2225	Q6ZXV5|TMTC3_HUMAN	250.35	104009	8	11	Protein O-mannosyl-transferase TMTC3 OS=Homo sapiens OX=9606 GN=TMTC3 PE=1 SV=2	Q6ZXV5		TMTC3	91.13	42.04	51.16	246.57	290.94	254.73
2172	2647	Q9H7D0|DOCK5_HUMAN	178.7	215307	5	4	Dedicator of cytokinesis protein 5 OS=Homo sapiens OX=9606 GN=DOCK5 PE=1 SV=3	Q9H7D0		DOCK5	107.16	158.47	155.77	222.48	175.71	221.2
2666	8439	Q06136|KDSR_HUMAN	168.08	36187	4	18	3-ketodihydrosphingosine reductase OS=Homo sapiens OX=9606 GN=KDSR PE=1 SV=1	Q06136		KDSR	251.01	227.29	239.68	287.04	233.95	250.29
1289	2634	Q14019|COTL1_HUMAN	224.86	15945	11	68	Coactosin-like protein OS=Homo sapiens OX=9606 GN=COTL1 PE=1 SV=3	Q14019		COTL1	317.94	470.13	354.13	274.72	296.77	234.16
1559	4208	Q01433|AMPD2_HUMAN	213.89	100688	7	8	AMP deaminase 2 OS=Homo sapiens OX=9606 GN=AMPD2 PE=1 SV=2	Q01433		AMPD2	329.19	250.66	243.69	269.69	227.68	242.26
2714	5880	Q14512|FGFP1_HUMAN	150.76	26264	3	18	Fibroblast growth factor-binding protein 1 OS=Homo sapiens OX=9606 GN=FGFBP1 PE=1 SV=1	Q14512		FGFP1	165.2	155.21	171.25	244.59	228.89	235.99
2824	18711	P63172|DYLT1_HUMAN	146.52	12452	2	30	Dynein light chain Tctex-type 1 OS=Homo sapiens OX=9606 GN=DYNLT1 PE=1 SV=1	P63172		DYLT1	236.9	231.88	241.69	254.77	237.65	236.86
1585	3910	P00390-3|GSHR_HUMAN	224.9	53027	7	29	Isoform 2 of Glutathione reductase mitochondrial OS=Homo sapiens OX=9606 GN=GSR	P00390	3	GSHR	113.03	160.15	177.37	324.03	341.94	233.2
1961	3578	Q8WWQ0|PHIP_HUMAN	173.79	206688	5	4	PH-interacting protein OS=Homo sapiens OX=9606 GN=PHIP PE=1 SV=2	Q8WWQ0		PHIP	115.98	103.44	114.61	291.75	278.41	245.34
2341	5887	Q96J01|THOC3_HUMAN	187.93	38772	5	19	THO complex subunit 3 OS=Homo sapiens OX=9606 GN=THOC3 PE=1 SV=1	Q96J01		THOC3	142.58	129.66	113.44	220.47	226.46	230.2
2109	2853	P30533|AMRP_HUMAN	203.4	41466	6	20	Alpha-2-macroglobulin receptor-associated protein OS=Homo sapiens OX=9606 GN=LRPAP1 PE=1 SV=1	P30533		AMRP	174.79	70.83	129.55	191.62	174.61	222.29
2907	4090	Q96H79|ZCCHL_HUMAN	176.81	32962	7	44	Zinc finger CCCH-type antiviral protein 1-like OS=Homo sapiens OX=9606 GN=ZC3HAV1L PE=1 SV=2	Q96H79		ZCCHL	42.81	25.15	17.79	21.84	133.88	139.16
2552	7982	Q5T6V5|QSPP_HUMAN	116.42	39029	3	11	Queuosine salvage protein OS=Homo sapiens OX=9606 GN=C9orf64 PE=1 SV=1	Q5T6V5		QSPP	123.06	178.03	277.56	235.73	249.27	232.61
1675	3410	P32322-3|P5CR1_HUMAN	235.03	35981	7	33	Isoform 3 of Pyrroline-5-carboxylate reductase 1 mitochondrial OS=Homo sapiens OX=9606 GN=PYCR1	P32322	3	P5CR1	163.68	163.06	190.64	246.07	261.99	238.54
2707	5791	O43663-4|PRC1_HUMAN	131.98	70191	3	6	Isoform 4 of Protein regulator of cytokinesis 1 OS=Homo sapiens OX=9606 GN=PRC1	O43663	4	PRC1	74.74	55.75	30.61	199.9	226.31	224.84
3149	5351	Q2TAL8|QRIC1_HUMAN	136.6	86436	4	8	Glutamine-rich protein 1 OS=Homo sapiens OX=9606 GN=QRICH1 PE=1 SV=1	Q2TAL8		QRIC1	101.05	105.76	49.5	111.41	142.46	227.28
1231	907	P24928|RPB1_HUMAN	324.32	217174	24	18	DNA-directed RNA polymerase II subunit RPB1 OS=Homo sapiens OX=9606 GN=POLR2A PE=1 SV=2	P24928		RPB1	261.15	176.01	198.93	390.18	266.79	262.48
1516	2824	P36776|LONM_HUMAN	214.24	106489	6	10	Lon protease homolog mitochondrial OS=Homo sapiens OX=9606 GN=LONP1 PE=1 SV=2	P36776		LONM	206.39	120.58	184.13	181.2	179.83	216.15
1395	1991	Q9UBV2|SE1L1_HUMAN	243.11	88755	8	20	Protein sel-1 homolog 1 OS=Homo sapiens OX=9606 GN=SEL1L PE=1 SV=3	Q9UBV2		SE1L1	233.74	186.43	151.7	153.34	170.45	206.13
2867	9834	P61923|COPZ1_HUMAN	165.71	20198	4	31	Coatomer subunit zeta-1 OS=Homo sapiens OX=9606 GN=COPZ1 PE=1 SV=1	P61923		COPZ1	348.98	324.6	348.52	227.85	228.44	229.88
1711	2153	Q8IXB1-2|DJC10_HUMAN	224.54	86136	12	22	Isoform 2 of DnaJ homolog subfamily C member 10 OS=Homo sapiens OX=9606 GN=DNAJC10	Q8IXB1	2	DJC10	143.23	95.84	34.23	89.12	173.93	169.6
2075	4551	O15264|MK13_HUMAN	176.61	42090	4	18	Mitogen-activated protein kinase 13 OS=Homo sapiens OX=9606 GN=MAPK13 PE=1 SV=1	O15264		MK13	155.83	104.51	100.29	250.94	195.9	228.99
1181	5481	P63167|DYL1_HUMAN	180.61	10366	2	64	Dynein light chain 1 cytoplasmic OS=Homo sapiens OX=9606 GN=DYNLL1 PE=1 SV=1	P63167		DYL1	242.82	81.35	110.72	224.13	50.3	220.59
2608	5364	Q9UGJ1-2|GCP4_HUMAN	146.14	76018	3	9	Isoform 2 of Gamma-tubulin complex component 4 OS=Homo sapiens OX=9606 GN=TUBGCP4	Q9UGJ1	2	GCP4	58.65	26.73	142.88	114.1	137.52	197.55
2073	2409	Q12996|CSTF3_HUMAN	241.65	82922	9	23	Cleavage stimulation factor subunit 3 OS=Homo sapiens OX=9606 GN=CSTF3 PE=1 SV=1	Q12996		CSTF3	176.61	143.8	121.54	192.27	254.72	227.83
2049	4257	Q02978|M2OM_HUMAN	193.74	34062	7	29	Mitochondrial 2-oxoglutarate/malate carrier protein OS=Homo sapiens OX=9606 GN=SLC25A11 PE=1 SV=3	Q02978		M2OM	162.78	84.1	24.43	218.63	141.6	221.6
2647	8251	Q8NFH3|NUP43_HUMAN	142.66	42151	2	13	Nucleoporin Nup43 OS=Homo sapiens OX=9606 GN=NUP43 PE=1 SV=1	Q8NFH3		NUP43	90.03	133.5	168.9	158.37	164.7	226.47
3104	5613	O60508|PRP17_HUMAN	122.45	65521	2	5	Pre-mRNA-processing factor 17 OS=Homo sapiens OX=9606 GN=CDC40 PE=1 SV=1	O60508		PRP17	144.65	129.9	109.92	155.55	163.08	195.51
2880	7648	Q9P0J7|KCMF1_HUMAN	103.79	41945	2	6	E3 ubiquitin-protein ligase KCMF1 OS=Homo sapiens OX=9606 GN=KCMF1 PE=1 SV=2	Q9P0J7		KCMF1	227.7	151.45	204.96	216.45	194.17	224.07
2030	2549	Q9UJ70-2|NAGK_HUMAN	207.56	42038	7	28	Isoform 2 of N-acetyl-D-glucosamine kinase OS=Homo sapiens OX=9606 GN=NAGK	Q9UJ70	2	NAGK	194.33	172.76	156	139.43	81.4	164.23
3793	7822	Q9UNP9-2|PPIE_HUMAN	78.97	33085	1	8	Isoform B of Peptidyl-prolyl cis-trans isomerase E OS=Homo sapiens OX=9606 GN=PPIE	Q9UNP9	2	PPIE	33.78	0	0	22.18	121.97	153.44
3647	8596	Q96I25|SPF45_HUMAN	143.57	44962	4	11	Splicing factor 45 OS=Homo sapiens OX=9606 GN=RBM17 PE=1 SV=1	Q96I25		SPF45	0	0	49.22	42.57	8.03	120.92
2847	5641	P09012|SNRPA_HUMAN	92.25	31280	2	11	U1 small nuclear ribonucleoprotein A OS=Homo sapiens OX=9606 GN=SNRPA PE=1 SV=3	P09012		SNRPA	216.15	220.21	201.23	218.19	239.15	228.31
2811	5844	P16333-2|NCK1_HUMAN	145.7	35511	4	22	Isoform 2 of Cytoplasmic protein NCK1 OS=Homo sapiens OX=9606 GN=NCK1	P16333	2	NCK1	62.92	136.52	164.7	202.7	268.85	225.23
1750	1346	Q9ULW0|TPX2_HUMAN	214.92	85653	11	22	Targeting protein for Xklp2 OS=Homo sapiens OX=9606 GN=TPX2 PE=1 SV=2	Q9ULW0		TPX2	45.43	12.2	79.96	191.79	146.46	214.1
2417	3349	Q8WUF5|IASPP_HUMAN	185.55	89091	7	16	RelA-associated inhibitor OS=Homo sapiens OX=9606 GN=PPP1R13L PE=1 SV=4	Q8WUF5		IASPP	168.02	42.03	70.45	209.09	58.7	211.7
2322	5088	Q9H9P8|L2HDH_HUMAN	170.91	50316	5	16	L-2-hydroxyglutarate dehydrogenase mitochondrial OS=Homo sapiens OX=9606 GN=L2HGDH PE=1 SV=3	Q9H9P8		L2HDH	69.44	73.2	113.27	201.81	117.85	210.32
1274	3763	P11234|RALB_HUMAN	204.35	23409	4	41	Ras-related protein Ral-B OS=Homo sapiens OX=9606 GN=RALB PE=1 SV=1	P11234		RALB	307.1	354.65	223.43	376.92	310.67	242.85
2178	5818	O95983|MBD3_HUMAN	187.91	32844	5	15	Methyl-CpG-binding domain protein 3 OS=Homo sapiens OX=9606 GN=MBD3 PE=1 SV=1	O95983		MBD3	55.08	0	33.28	59.01	137.56	148.41
2035	5576	O00330-3|ODPX_HUMAN	168.22	51460	4	15	Isoform 3 of Pyruvate dehydrogenase protein X component mitochondrial OS=Homo sapiens OX=9606 GN=PDHX	O00330	3	ODPX	80.12	79.41	117.77	232.41	202.67	220.79
1747	3930	P43155|CACP_HUMAN	219.23	70858	5	12	Carnitine O-acetyltransferase OS=Homo sapiens OX=9606 GN=CRAT PE=1 SV=5	P43155		CACP	105.89	153.53	162.03	340	171.82	222.31
2382	2517	Q9UKS6|PACN3_HUMAN	188.78	48487	7	25	Protein kinase C and casein kinase substrate in neurons protein 3 OS=Homo sapiens OX=9606 GN=PACSIN3 PE=1 SV=2	Q9UKS6		PACN3	510.67	240.71	538.83	237.33	202.68	219.78
1619	3517	Q9NS86|LANC2_HUMAN	210.4	50854	8	22	LanC-like protein 2 OS=Homo sapiens OX=9606 GN=LANCL2 PE=1 SV=1	Q9NS86		LANC2	153.05	92.19	101.03	144.84	279.18	221.88
2277	6067	Q16774|KGUA_HUMAN	191.31	21726	5	52	Guanylate kinase OS=Homo sapiens OX=9606 GN=GUK1 PE=1 SV=2	Q16774		KGUA	81.75	23.95	31.84	143.26	125.6	175.75
2050	5749	Q9BRJ2|RM45_HUMAN	147.21	35351	3	18	39S ribosomal protein L45 mitochondrial OS=Homo sapiens OX=9606 GN=MRPL45 PE=1 SV=2	Q9BRJ2		RM45	62.15	62.63	54.48	200	259.89	221.16
2344	10764	Q9UPY5|XCT_HUMAN	111.83	55423	2	6	Cystine/glutamate transporter OS=Homo sapiens OX=9606 GN=SLC7A11 PE=1 SV=1	Q9UPY5		XCT	124.05	107.2	167.36	66.91	94.23	177.38
1688	5147	Q8TEA8|DTD1_HUMAN	199.97	23424	6	32	D-aminoacyl-tRNA deacylase 1 OS=Homo sapiens OX=9606 GN=DTD1 PE=1 SV=2	Q8TEA8		DTD1	322.66	231.84	250.51	260.49	259.61	234.64
3515	10766	Q7Z3T8|ZFY16_HUMAN	128.92	168903	2	3	Zinc finger FYVE domain-containing protein 16 OS=Homo sapiens OX=9606 GN=ZFYVE16 PE=1 SV=3	Q7Z3T8		ZFY16	172.18	82.61	89.03	205.31	219.21	218.62
2376	8192	Q13671|RIN1_HUMAN	180.43	84099	5	10	Ras and Rab interactor 1 OS=Homo sapiens OX=9606 GN=RIN1 PE=1 SV=4	Q13671		RIN1	39.12	54.92	36.5	208.76	173.49	209.23
2492	8896	Q16880|CGT_HUMAN	97.26	61438	2	6	2-hydroxyacylsphingosine 1-beta-galactosyltransferase OS=Homo sapiens OX=9606 GN=UGT8 PE=2 SV=2	Q16880		CGT	60.77	183.2	178.3	161.85	82.5	192.65
2817	7338	Q9UIJ7|KAD3_HUMAN	166.1	25565	5	28	GTP:AMP phosphotransferase AK3 mitochondrial OS=Homo sapiens OX=9606 GN=AK3 PE=1 SV=4	Q9UIJ7		KAD3	114.76	68.79	17.4	79.17	21.94	131.48
2763	8068	Q96T51|RUFY1_HUMAN	112.83	79818	2	5	RUN and FYVE domain-containing protein 1 OS=Homo sapiens OX=9606 GN=RUFY1 PE=1 SV=2	Q96T51		RUFY1	41.11	61.62	46.66	118.35	165	190.83
1281	2995	Q92769|HDAC2_HUMAN	216.6	55364	4	23	Histone deacetylase 2 OS=Homo sapiens OX=9606 GN=HDAC2 PE=1 SV=2	Q92769		HDAC2	145.69	115.38	109.72	181.49	211.02	209.94
[truncated: 2,521 more rows]

## Sheet: volcano_Cvs35D
Significant FDR<0.05,FoldChange≥±1	-LOG(P-value)			Difference	Description	Accession	Accession		isoform	protein NAME	Protein Group	Protein ID	-10lgP	Avg. Mass (Dalton)	#Unique_peptide	unique Coverage (%)	35D_1	35D_2	35D_3	C1	C2	C3
+	4.0329	9.27053e-05	4.0329	1.32389	Endoplasmic reticulum chaperone BiP OS=Homo sapiens OX=9606 GN=HSPA5 PE=1 SV=2	P11021|BIP_HUMAN	P11021	BIP_HUMAN		BIP	31	46	488.05	72333	46	69	15.8512	15.6576	15.5856	14.3408	14.4261	14.3558				TRUE	TRUE
+	4.82726	1.48846e-05		1.04196	Anterior gradient protein 2 homolog OS=Homo sapiens OX=9606 GN=AGR2 PE=1 SV=1	O95994|AGR2_HUMAN	O95994	AGR2_HUMAN		AGR2	271	3237	341.37	19979	11	62	13.366	13.4408	13.3597	12.3288	12.3023	12.4096				TRUE	TRUE
-	2.80158	0.00157913		0.925433	Annexin A5 OS=Homo sapiens OX=9606 GN=ANXA5 PE=1 SV=2	P08758|ANXA5_HUMAN	P08758	ANXA5_HUMAN		ANXA5	391	1106	301.64	35937	16	56	12.9461	12.6943	12.7471	11.735	11.8254	12.0507				TRUE	FALSE
+	5.95531	1.10838e-06		1.94373	Tryptophan--tRNA ligase cytoplasmic OS=Homo sapiens OX=9606 GN=WARS1 PE=1 SV=2	P23381|SYWC_HUMAN	P23381	SYWC_HUMAN		SYWC	163	38	410.5	53165	29	77	14.1905	14.3036	14.2747	12.3527	12.2779	12.3071				TRUE	TRUE
+	5.95947	1.09781e-06		1.07037	Nucleophosmin OS=Homo sapiens OX=9606 GN=NPM1 PE=1 SV=2	P06748|NPM_HUMAN	P06748	NPM_HUMAN		NPM	399	2358	350.57	32575	15	53	13.0031	12.965	12.9899	11.8813	11.9475	11.9182				TRUE	TRUE
+	1.89952	0.0126032		-1.15219	Cytoplasmic aconitate hydratase OS=Homo sapiens OX=9606 GN=ACO1 PE=1 SV=3	P21399|ACOC_HUMAN	P21399	ACOC_HUMAN		ACOC	712	1274	297.87	98399	16	29	9.47529	9.57824	9.75228	10.2649	10.8728	11.1247				TRUE	TRUE
+	1.47943	0.0331567		-1.32024	V-type proton ATPase catalytic subunit A OS=Homo sapiens OX=9606 GN=ATP6V1A PE=1 SV=2	P38606|VATA_HUMAN	P38606	VATA_HUMAN		VATA	880	1273	291.79	68304	17	44	8.55991	8.66772	8.72451	9.82056	9.34665	10.7456				TRUE	TRUE
+	3.49898	0.000316971		-1.38022	Proliferation marker protein Ki-67 OS=Homo sapiens OX=9606 GN=MKI67 PE=1 SV=2	P46013|KI67_HUMAN	P46013	KI67_HUMAN		KI67	217	164	420.26	358695	58	27	9.95934	9.60288	9.75143	11.2426	11.0405	11.1712				TRUE	TRUE
+	3.58017	0.000262924		-2.49902	Retrotransposon-derived protein PEG10 OS=Homo sapiens OX=9606 GN=PEG10 PE=1 SV=2	Q86TG7|PEG10_HUMAN	Q86TG7	PEG10_HUMAN		PEG10	1105	1661	271.76	80173	11	30	8.37286	8.87141	8.18834	10.9489	10.9533	11.0275				TRUE	TRUE
+	2.46535	0.00342489		-1.0318	Palmitoyl-protein thioesterase 1 OS=Homo sapiens OX=9606 GN=PPT1 PE=1 SV=1	P50897|PPT1_HUMAN	P50897	PPT1_HUMAN		PPT1	825	2838	255.02	34193	10	40	9.56596	9.31413	9.52211	10.6086	10.2083	10.6807				TRUE	TRUE
+	1.99962	0.0100086		1.30666	Hypoxia up-regulated protein 1 OS=Homo sapiens OX=9606 GN=HYOU1 PE=1 SV=1	Q9Y4L1|HYOU1_HUMAN	Q9Y4L1	HYOU1_HUMAN		HYOU1	347	127	380.88	111335	33	47	12.4625	12.5139	11.7652	10.7829	11.2389	10.7998				TRUE	TRUE
+	2.85569	0.00139414		1.757	Uridine phosphorylase 1 OS=Homo sapiens OX=9606 GN=UPP1 PE=1 SV=1	Q16831|UPP1_HUMAN	Q16831	UPP1_HUMAN		UPP1	1334	3019	245.54	33934	6	28	12.32	12.0926	12.2318	10.6411	10.034	10.6984				TRUE	TRUE
+	4.56458	2.72536e-05		-3.50862	Nucleobindin-1 OS=Homo sapiens OX=9606 GN=NUCB1 PE=1 SV=4	Q02818|NUCB1_HUMAN	Q02818	NUCB1_HUMAN		NUCB1	1074	1099	263.23	53879	14	46	6.97945	7.47695	7.29774	10.8895	10.6386	10.7519				TRUE	TRUE
+	1.95021	0.0112148		-2.15272	Diacylglycerol kinase alpha OS=Homo sapiens OX=9606 GN=DGKA PE=1 SV=3	P23743|DGKA_HUMAN	P23743	DGKA_HUMAN		DGKA	1421	1792	247.17	82630	12	28	7.87443	6.75475	7.84021	9.76479	9.0483	10.1145				TRUE	TRUE
+	3.09794	0.00079811		-1.25754	Isoform 4 of Liprin-beta-1 OS=Homo sapiens OX=9606 GN=PPFIBP1	Q86W92-4|LIPB1_HUMAN	Q86W92-4	LIPB1_HUMAN	4	LIPB1	543	628	314.07	110297	23	28	9.32627	9.22292	9.267	10.7054	10.2656	10.6178				TRUE	TRUE
+	4.75624	1.7529e-05		-1.43251	Acyl carrier protein mitochondrial OS=Homo sapiens OX=9606 GN=NDUFAB1 PE=1 SV=3	O14561|ACPM_HUMAN	O14561	ACPM_HUMAN		ACPM	1550	15273	178.78	17417	5	24	9.13455	9.1363	9.02256	10.4445	10.6018	10.5446				TRUE	TRUE
+	2.17477	0.00668697		-1.55636	Cytochrome c oxidase subunit 5A mitochondrial OS=Homo sapiens OX=9606 GN=COX5A PE=1 SV=2	P20674|COX5A_HUMAN	P20674	COX5A_HUMAN		COX5A	1999	8531	151.75	16762	3	18	9.44342	9.04081	8.40867	10.4926	10.5383	10.5311				TRUE	TRUE
+	2.92496	0.0011886		1.02109	Isoform 2 of Rho guanine nucleotide exchange factor 2 OS=Homo sapiens OX=9606 GN=ARHGEF2	Q92974-2|ARHG2_HUMAN	Q92974-2	ARHG2_HUMAN	2	ARHG2	513	481	330.75	111471	20	32	11.3468	11.3441	11.3754	10.4477	10.0873	10.468				TRUE	TRUE
+	2.70213	0.00198551		-1.11379	Serine palmitoyltransferase 1 OS=Homo sapiens OX=9606 GN=SPTLC1 PE=1 SV=1	O15269|SPTC1_HUMAN	O15269	SPTC1_HUMAN		SPTC1	823	1216	263.21	52744	13	38	9.53494	9.33836	9.09162	10.5884	10.2871	10.4308				TRUE	TRUE
+	3.04977	0.000891714		2.22004	Non-histone chromosomal protein HMG-17 OS=Homo sapiens OX=9606 GN=HMGN2 PE=1 SV=3	P05204|HMGN2_HUMAN	P05204	HMGN2_HUMAN		HMGN2	552	3573	306.99	9393	10	72	12.4437	11.9778	12.0795	10.0386	9.5525	10.2498				TRUE	TRUE
-	4.40869	3.90217e-05		0.824765	LIM and SH3 domain protein 1 OS=Homo sapiens OX=9606 GN=LASP1 PE=1 SV=2	Q14847|LASP1_HUMAN	Q14847	LASP1_HUMAN		LASP1	924	1775	231.52	29717	10	65	11.2104	11.1687	11.0764	10.3006	10.3451	10.3354				TRUE	FALSE
+	1.78352	0.0164619		-1.17211	Isoform 4 of Acyl-coenzyme A thioesterase 9 mitochondrial OS=Homo sapiens OX=9606 GN=ACOT9	Q9Y305-4|ACOT9_HUMAN	Q9Y305-4	ACOT9_HUMAN	4	ACOT9	1248	1584	247.05	50851	9	33	9.2159	8.51889	8.49045	10.0058	9.57529	10.1605				TRUE	TRUE
+	3.06851	0.000854064		-1.41813	ATP synthase subunit g mitochondrial OS=Homo sapiens OX=9606 GN=ATP5MG PE=1 SV=3	O75964|ATP5L_HUMAN	O75964	ATP5L_HUMAN		ATP5L	1968	15369	147.1	11428	2	26	8.85786	8.72393	8.66452	10.3258	9.87249	10.3024				TRUE	TRUE
+	1.98257	0.0104094		1.35668	40S ribosomal protein S28 OS=Homo sapiens OX=9606 GN=RPS28 PE=1 SV=1	P62857|RS28_HUMAN	P62857	RS28_HUMAN		RS28	1856	10872	110.2	7841	2	33	11.3293	10.7667	10.5954	9.35087	9.33157	9.9389				TRUE	TRUE
+	2.05268	0.0088577		-1.17842	FAST kinase domain-containing protein 4 OS=Homo sapiens OX=9606 GN=TBRG4 PE=1 SV=1	Q969Z0|FAKD4_HUMAN	Q969Z0	FAKD4_HUMAN		FAKD4	598	1067	318.16	70738	12	34	8.96639	9.1306	8.96368	10.6315	9.79884	10.1655				TRUE	TRUE
-	3.23311	0.000584647		-0.916709	RNA helicase aquarius OS=Homo sapiens OX=9606 GN=AQR PE=1 SV=4	O60306|AQR_HUMAN	O60306	AQR_HUMAN		AQR	893	788	287.83	171294	12	12	8.83996	8.93902	8.92119	9.76315	9.6994	9.98775				TRUE	FALSE
+	3.31737	0.000481537		-1.56863	S-phase kinase-associated protein 1 OS=Homo sapiens OX=9606 GN=SKP1 PE=1 SV=2	P63208|SKP1_HUMAN	P63208	SKP1_HUMAN		SKP1	1457	4021	201.31	18658	7	64	8.2878	8.31637	8.56064	10.1085	9.71246	10.0498				TRUE	TRUE
+	3.83642	0.000145742		2.13426	Cysteine-rich protein 1 OS=Homo sapiens OX=9606 GN=CRIP1 PE=1 SV=3	P50238|CRIP1_HUMAN	P50238	CRIP1_HUMAN		CRIP1	1443	5097	196.28	8533	4	71	12.7978	12.766	12.7553	10.7888	10.7897	10.3377				TRUE	TRUE
+	3.77813	0.000166673		1.51379	Annexin A3 OS=Homo sapiens OX=9606 GN=ANXA3 PE=1 SV=3	P12429|ANXA3_HUMAN	P12429	ANXA3_HUMAN		ANXA3	506	1718	283	36375	15	50	12.0398	11.8192	11.8525	10.5042	10.4469	10.2191				TRUE	TRUE
+	2.20522	0.0062342		-2.52031	Isoform 2 of Anillin OS=Homo sapiens OX=9606 GN=ANLN	Q9NQW6-2|ANLN_HUMAN	Q9NQW6-2	ANLN_HUMAN	2	ANLN	1224	849	243.89	120016	13	17	6.14995	7.59193	7.10077	9.43348	9.09882	9.87127				TRUE	TRUE
-	0.908483	0.123457		-3.27841	Histone acetyltransferase type B catalytic subunit OS=Homo sapiens OX=9606 GN=HAT1 PE=1 SV=1	O14929|HAT1_HUMAN	O14929	HAT1_HUMAN		HAT1	2958	5317	152.31	49513	6	31	7.84737	2.74457	7.61993	9.23016	8.97255	9.84439				FALSE	TRUE
+	1.84746	0.0142083		-1.39425	Trifunctional enzyme subunit beta mitochondrial OS=Homo sapiens OX=9606 GN=HADHB PE=1 SV=3	P55084|ECHB_HUMAN	P55084	ECHB_HUMAN		ECHB	708	1558	303.66	51294	16	47	9.04445	9.57718	8.44977	10.4258	10.5547	10.2736				TRUE	TRUE
+	2.91514	0.00121579		-1.60326	Isoform 2 of Golgi apparatus protein 1 OS=Homo sapiens OX=9606 GN=GLG1	Q92896-2|GSLG1_HUMAN	Q92896-2	GSLG1_HUMAN	2	GSLG1	1399	1528	282.08	137222	13	17	8.03766	7.89379	8.39313	9.79056	9.46105	9.88273				TRUE	TRUE
+	4.42881	3.72557e-05		-1.09368	Cation-independent mannose-6-phosphate receptor OS=Homo sapiens OX=9606 GN=IGF2R PE=1 SV=3	P11717|MPRI_HUMAN	P11717	MPRI_HUMAN		MPRI	947	1094	286.05	274373	14	7	8.9326	8.95757	8.99064	10.1535	10.0313	9.97702				TRUE	TRUE
+	1.8335	0.0146723		-1.37101	28S ribosomal protein S29 mitochondrial OS=Homo sapiens OX=9606 GN=DAP3 PE=1 SV=1	P51398|RT29_HUMAN	P51398	RT29_HUMAN		RT29	1066	3482	257.53	45566	7	23	8.68296	8.5611	7.77208	9.9086	9.36772	9.85286				TRUE	TRUE
+	4.15018	7.07645e-05		1.20604	Sequestosome-1 OS=Homo sapiens OX=9606 GN=SQSTM1 PE=1 SV=1	Q13501|SQSTM_HUMAN	Q13501	SQSTM_HUMAN		SQSTM	584	1582	267.23	47687	12	50	11.1548	11.1706	11.2111	10.1067	9.87627	9.93544				TRUE	TRUE
+	3.12787	0.000744961		-1.24653	Presequence protease mitochondrial OS=Homo sapiens OX=9606 GN=PITRM1 PE=1 SV=3	Q5JRX3|PREP_HUMAN	Q5JRX3	PREP_HUMAN		PREP	1187	1939	249.32	117413	13	20	8.77949	8.34123	8.64847	9.79547	9.81097	9.90233				TRUE	TRUE
+	2.68231	0.00207822		-1.00504	Condensin complex subunit 1 OS=Homo sapiens OX=9606 GN=NCAPD2 PE=1 SV=3	Q15021|CND1_HUMAN	Q15021	CND1_HUMAN		CND1	765	530	313.24	157182	21	24	9.18378	8.81615	9.14062	9.95688	10.2132	9.98559				TRUE	TRUE
+	3.00673	0.000984624		-1.49057	ER membrane protein complex subunit 1 OS=Homo sapiens OX=9606 GN=EMC1 PE=1 SV=1	Q8N766|EMC1_HUMAN	Q8N766	EMC1_HUMAN		EMC1	846	1537	271.82	111759	15	23	8.39686	7.96792	8.13873	9.74557	9.42286	9.80679				TRUE	TRUE
+	3.83523	0.000146139		-1.2433	Oxygen-dependent coproporphyrinogen-III oxidase mitochondrial OS=Homo sapiens OX=9606 GN=CPOX PE=1 SV=3	P36551|HEM6_HUMAN	P36551	HEM6_HUMAN		HEM6	1031	2055	266.32	50152	12	27	8.72124	8.6503	8.53119	10.005	9.77058	9.85709				TRUE	TRUE
+	3.45727	0.000348922		-1.92791	Lipoamide acyltransferase component of branched-chain alpha-keto acid dehydrogenase complex mitochondrial OS=Homo sapiens OX=9606 GN=DBT PE=1 SV=3	P11182|ODB2_HUMAN	P11182	ODB2_HUMAN		ODB2	1490	2148	230.77	53487	10	36	7.35165	7.51688	7.70556	9.19286	9.50978	9.65517				TRUE	TRUE
-	0.970839	0.106945		2.90324	Serine/arginine-rich splicing factor 2 OS=Homo sapiens OX=9606 GN=SRSF2 PE=1 SV=4	Q01130|SRSF2_HUMAN	Q01130	SRSF2_HUMAN		SRSF2	1349	6470	118.42	25476	2	9	10.0794	10.5746	9.09995	4.51412	7.46826	9.06186				FALSE	TRUE
+	3.18496	0.00065319		-1.08248	39S ribosomal protein L44 mitochondrial OS=Homo sapiens OX=9606 GN=MRPL44 PE=1 SV=1	Q9H9J2|RM44_HUMAN	Q9H9J2	RM44_HUMAN		RM44	1360	5383	229.3	37535	8	30	8.45138	8.37938	8.33195	9.27305	9.49592	9.64117				TRUE	TRUE
+	1.38997	0.0407404		-3.995	Isoform 3 of Hepatoma-derived growth factor-related protein 2 OS=Homo sapiens OX=9606 GN=HDGFL2	Q7Z4V5-3|HDGR2_HUMAN	Q7Z4V5-3	HDGR2_HUMAN	3	HDGR2	1983	1866	204.22	74816	9	23	6.34305	2.09827	5.12019	8.28452	7.87104	9.39094				TRUE	TRUE
+	3.08737	0.000817761		-2.46249	Ceramide synthase 2 OS=Homo sapiens OX=9606 GN=CERS2 PE=1 SV=1	Q96G23|CERS2_HUMAN	Q96G23	CERS2_HUMAN		CERS2	1647	3712	226.69	44876	6	20	6.89893	7.39532	7.66078	10.0021	9.48396	9.85646				TRUE	TRUE
-	1.21578	0.0608444		-1.86687	Pyrroline-5-carboxylate reductase 2 OS=Homo sapiens OX=9606 GN=PYCR2 PE=1 SV=1	Q96C36|P5CR2_HUMAN	Q96C36	P5CR2_HUMAN		P5CR2	1645	4404	233.23	33637	7	44	7.54797	5.84524	7.38526	9.09827	7.86009	9.42072				FALSE	TRUE
-	3.63444	0.000232039		-0.898311	Isoform 2 of Isocitrate dehydrogenase [NAD] subunit gamma mitochondrial OS=Homo sapiens OX=9606 GN=IDH3G	P51553-2|IDH3G_HUMAN	P51553-2	IDH3G_HUMAN	2	IDH3G	1275	2922	221.65	41468	5	23	8.81112	8.69669	8.79048	9.54172	9.74483	9.70667				TRUE	FALSE
+	1.59437	0.0254467		-1.30484	Isoform 2 of CD59 glycoprotein OS=Homo sapiens OX=9606 GN=CD59	P13987-2|CD59_HUMAN	P13987-2	CD59_HUMAN	2	CD59	2215	16595	132.3	14529	2	18	8.84018	7.75195	8.19303	9.16352	9.80465	9.73151				TRUE	TRUE
+	2.42793	0.00373309		-1.03903	Mitochondrial-processing peptidase subunit beta OS=Homo sapiens OX=9606 GN=PMPCB PE=1 SV=2	O75439|MPPB_HUMAN	O75439	MPPB_HUMAN		MPPB	1409	3404	242.64	54366	10	37	8.41912	8.62801	8.09487	9.32001	9.37767	9.5614				TRUE	TRUE
+	1.4435	0.0360168		-2.08702	Polypeptide N-acetylgalactosaminyltransferase 2 OS=Homo sapiens OX=9606 GN=GALNT2 PE=1 SV=1	Q10471|GALT2_HUMAN	Q10471	GALT2_HUMAN		GALT2	1027	1307	266.86	64733	13	31	8.17253	7.77617	5.99684	9.3359	9.34296	9.52773				TRUE	TRUE
-	2.41888	0.00381175		-0.993924	Isoform 2 of Testis-expressed protein 10 OS=Homo sapiens OX=9606 GN=TEX10	Q9NXF1-2|TEX10_HUMAN	Q9NXF1-2	TEX10_HUMAN	2	TEX10	1520	2078	246.12	103915	11	20	8.60622	8.38288	8.10753	9.27761	9.28174	9.51905				TRUE	FALSE
+	1.85646	0.0139167		-1.81677	Isoform 2 of Nucleosome assembly protein 1-like 4 OS=Homo sapiens OX=9606 GN=NAP1L4	Q99733-2|NP1L4_HUMAN	Q99733-2	NP1L4_HUMAN	2	NP1L4	977	3543	238.36	44079	6	26	8.26106	6.99797	7.06307	8.97476	9.36824	9.42941				TRUE	TRUE
+	1.47252	0.0336886		-1.90773	Isoform Beta-1 of DNA topoisomerase 2-beta OS=Homo sapiens OX=9606 GN=TOP2B	Q02880-2|TOP2B_HUMAN	Q02880-2	TOP2B_HUMAN	2	TOP2B	1405	786	257.2	182661	14	14	7.62979	5.76924	6.62834	8.18963	8.46508	9.09587				TRUE	TRUE
-	3.62655	0.000236294		-0.903528	Inositol 1 4 5-trisphosphate receptor type 3 OS=Homo sapiens OX=9606 GN=ITPR3 PE=1 SV=2	Q14573|ITPR3_HUMAN	Q14573	ITPR3_HUMAN		ITPR3	935	608	292.71	304105	21	12	8.94301	8.79812	8.87946	9.77969	9.87781	9.67368				TRUE	FALSE
+	2.53326	0.00292912		-1.20119	Kelch-like ECH-associated protein 1 OS=Homo sapiens OX=9606 GN=KEAP1 PE=1 SV=2	Q14145|KEAP1_HUMAN	Q14145	KEAP1_HUMAN		KEAP1	1115	1638	269.35	69666	13	30	8.56811	8.57137	8.01341	9.58052	9.59057	9.58538				TRUE	TRUE
+	3.65023	0.000223754		-2.23805	DNA topoisomerase 2-alpha OS=Homo sapiens OX=9606 GN=TOP2A PE=1 SV=3	P11388|TOP2A_HUMAN	P11388	TOP2A_HUMAN		TOP2A	1012	653	312.88	174384	19	19	7.70701	7.10035	7.37199	9.65641	9.6476	9.5895				TRUE	TRUE
+	2.24026	0.00575091		-1.67672	DNA (cytosine-5)-methyltransferase 1 OS=Homo sapiens OX=9606 GN=DNMT1 PE=1 SV=2	P26358|DNMT1_HUMAN	P26358	DNMT1_HUMAN		DNMT1	1449	651	264.57	183164	15	14	7.78653	6.94942	7.81826	9.25729	8.95096	9.3761				TRUE	TRUE
+	2.63438	0.0023207		1.03196	Cystatin-B OS=Homo sapiens OX=9606 GN=CSTB PE=1 SV=2	P04080|CYTB_HUMAN	P04080	CYTB_HUMAN		CYTB	1539	16075	148.42	11140	2	34	10.2306	10.3636	10.1463	9.01131	9.16123	9.47198				TRUE	TRUE
+	2.55499	0.00278621		-1.08576	Isoform C1 of Tight junction protein ZO-2 OS=Homo sapiens OX=9606 GN=TJP2	Q9UDY2-3|ZO2_HUMAN	Q9UDY2-3	ZO2_HUMAN	3	ZO2	1213	1175	252.52	131368	13	17	8.05853	7.76812	8.08231	8.84087	9.03249	9.29287				TRUE	TRUE
+	1.8286	0.014839		-1.19029	Beta-hexosaminidase subunit alpha OS=Homo sapiens OX=9606 GN=HEXA PE=1 SV=2	P06865|HEXA_HUMAN	P06865	HEXA_HUMAN		HEXA	1743	5967	210.1	60703	6	18	7.61456	8.52356	7.80658	9.2008	9.00725	9.30752				TRUE	TRUE
-	1.25711	0.0553214		-3.52385	39S ribosomal protein L3 mitochondrial OS=Homo sapiens OX=9606 GN=MRPL3 PE=1 SV=1	P09001|RM03_HUMAN	P09001	RM03_HUMAN		RM03	1888	3041	201.92	38633	6	31	6.6659	2.93828	6.86716	9.28877	8.38603	9.36807				FALSE	TRUE
+	1.63059	0.0234105		-1.28646	Catalase OS=Homo sapiens OX=9606 GN=CAT PE=1 SV=3	P04040|CATA_HUMAN	P04040	CATA_HUMAN		CATA	896	1223	303.36	59756	15	45	8.60911	7.99333	9.16453	9.72923	10.1237	9.77345				TRUE	TRUE
+	1.41591	0.0383787		-1.62649	Isoform 2 of CD166 antigen OS=Homo sapiens OX=9606 GN=ALCAM	Q13740-2|CD166_HUMAN	Q13740-2	CD166_HUMAN	2	CD166	1108	1394	271.67	63665	16	29	9.00166	8.76358	7.36133	10.257	10.0296	9.71944				TRUE	TRUE
-	2.7855	0.00163869		-0.94844	Nuclear-interacting partner of ALK OS=Homo sapiens OX=9606 GN=ZC3HC1 PE=1 SV=1	Q86WB0|NIPA_HUMAN	Q86WB0	NIPA_HUMAN		NIPA	2401	6287	117.7	55262	2	7	8.3984	8.04887	8.20687	9.17163	9.03535	9.29248				TRUE	FALSE
+	3.72802	0.000187058		-1.28616	Disintegrin and metalloproteinase domain-containing protein 10 OS=Homo sapiens OX=9606 GN=ADAM10 PE=1 SV=1	O14672|ADA10_HUMAN	O14672	ADA10_HUMAN		ADA10	879	1306	275.59	84142	10	23	8.28035	8.11192	8.03925	9.56018	9.34986	9.37996				TRUE	TRUE
+	3.23303	0.000584753		-2.35352	Isoform 2 of Programmed cell death protein 4 OS=Homo sapiens OX=9606 GN=PDCD4	Q53EL6-2|PDCD4_HUMAN	Q53EL6-2	PDCD4_HUMAN	2	PDCD4	1476	3065	254.35	50576	7	26	7.41625	6.73186	6.72055	9.18992	9.35986	9.37944				TRUE	TRUE
+	1.74689	0.0179108		-1.20686	Apoptosis-inducing factor 1 mitochondrial OS=Homo sapiens OX=9606 GN=AIFM1 PE=1 SV=1	O95831|AIFM1_HUMAN	O95831	AIFM1_HUMAN		AIFM1	876	1805	282.35	66901	12	25	8.93219	8.4412	8.2078	9.55275	10.1845	9.46451				TRUE	TRUE
-	2.8545	0.00139799		0.976366	Isoform 4 of Low-density lipoprotein receptor OS=Homo sapiens OX=9606 GN=LDLR	P01130-4|LDLR_HUMAN	P01130-4	LDLR_HUMAN	4	LDLR	824	1368	300.48	90940	11	23	10.2768	10.2158	10.4544	9.51094	9.16111	9.3458				TRUE	FALSE
+	2.21759	0.00605919		-1.19445	Glycogen debranching enzyme OS=Homo sapiens OX=9606 GN=AGL PE=1 SV=3	P35573|GDE_HUMAN	P35573	GDE_HUMAN		GDE	970	503	306.51	174763	21	24	7.81064	7.53325	7.4941	8.79731	8.46254	9.16148				TRUE	TRUE
+	1.34273	0.0454224		1.55638	Translationally-controlled tumor protein OS=Homo sapiens OX=9606 GN=TPT1 PE=1 SV=1	P13693|TCTP_HUMAN	P13693	TCTP_HUMAN		TCTP	706	3593	239.74	19595	9	58	12.021	12.4595	11.9983	11.6226	10.2797	9.90734				TRUE	TRUE
+	1.54003	0.0288381		-2.62888	Aldo-keto reductase family 1 member C3 OS=Homo sapiens OX=9606 GN=AKR1C3 PE=1 SV=4	P42330|AK1C3_HUMAN	P42330	AK1C3_HUMAN		AK1C3	212	1269	349.17	36853	4	72	4.25172	4.38612	5.04481	6.98937	6.00607	8.57384				TRUE	TRUE
-	3.26132	0.000547875		-0.89674	Protein S100-A14 OS=Homo sapiens OX=9606 GN=S100A14 PE=1 SV=1	Q9HCY8|S10AE_HUMAN	Q9HCY8	S10AE_HUMAN		S10AE	1398	6550	222.14	11662	5	63	8.78074	8.79396	8.86456	9.813	9.77569	9.54079				TRUE	FALSE
+	1.96091	0.0109418		-1.4572	39S ribosomal protein L15 mitochondrial OS=Homo sapiens OX=9606 GN=MRPL15 PE=1 SV=1	Q9P015|RM15_HUMAN	Q9P015	RM15_HUMAN		RM15	1448	4719	210.96	33420	6	20	7.76593	6.972	7.36693	8.95623	8.37777	9.14246				TRUE	TRUE
+	2.16261	0.0068769		1.41716	Annexin A4 OS=Homo sapiens OX=9606 GN=ANXA4 PE=1 SV=4	P09525|ANXA4_HUMAN	P09525	ANXA4_HUMAN		ANXA4	1592	3923	191.23	35883	5	21	10.4277	9.90818	10.3699	9.00152	8.37513	9.07759				TRUE	TRUE
+	1.65779	0.0219894		1.20375	Isoform 2 of Golgin subfamily A member 3 OS=Homo sapiens OX=9606 GN=GOLGA3	Q08378-2|GOGA3_HUMAN	Q08378-2	GOGA3_HUMAN	2	GOGA3	780	270	301.43	155682	19	20	9.78504	10.7442	10.2841	8.76215	9.38834	9.05154				TRUE	TRUE
+	2.4075	0.00391295		2.54924	Non-histone chromosomal protein HMG-14 OS=Homo sapiens OX=9606 GN=HMGN1 PE=1 SV=3	P05114|HMGN1_HUMAN	P05114	HMGN1_HUMAN		HMGN1	1297	5196	200.69	10659	6	52	11.2337	10.9402	11.5081	9.04639	7.89276	9.09524				TRUE	TRUE
-	3.0614	0.00086816		-0.888256	NADH dehydrogenase [ubiquinone] 1 alpha subcomplex subunit 8 OS=Homo sapiens OX=9606 GN=NDUFA8 PE=1 SV=3	P51970|NDUA8_HUMAN	P51970	NDUA8_HUMAN		NDUA8	2212	5970	175.83	20105	3	27	8.40812	8.08087	8.22603	9.08561	9.10821	9.18597				TRUE	FALSE
+	1.66469	0.0216428		-1.37309	Enhancer of rudimentary homolog OS=Homo sapiens OX=9606 GN=ERH PE=1 SV=1	P84090|ERH_HUMAN	P84090	ERH_HUMAN		ERH	2360	24788	123.57	12259	2	22	7.09887	7.64926	7.71555	8.22038	9.15654	9.20604				TRUE	TRUE
+	2.62569	0.00236763		-1.54082	Short-chain specific acyl-CoA dehydrogenase mitochondrial OS=Homo sapiens OX=9606 GN=ACADS PE=1 SV=1	P16219|ACADS_HUMAN	P16219	ACADS_HUMAN		ACADS	2645	9013	139.06	44297	2	13	7.45951	7.90032	7.15846	9.06415	8.92867	9.14794				TRUE	TRUE
+	2.70492	0.00197277		-1.24094	Aspartyl aminopeptidase OS=Homo sapiens OX=9606 GN=DNPEP PE=1 SV=1	Q9ULA0|DNPEP_HUMAN	Q9ULA0	DNPEP_HUMAN		DNPEP	1309	3365	239.96	52428	10	31	7.62271	8.13955	8.14006	9.20838	9.20706	9.2097				TRUE	TRUE
+	1.66785	0.0214856		-1.7818	Serine/threonine-protein phosphatase PGAM5 mitochondrial OS=Homo sapiens OX=9606 GN=PGAM5 PE=1 SV=2	Q96HS1|PGAM5_HUMAN	Q96HS1	PGAM5_HUMAN		PGAM5	1612	4771	213.4	32004	4	18	6.91791	6.86666	8.07676	9.47454	8.52352	9.20867				TRUE	TRUE
+	1.99438	0.0101302		-1.49641	Isoform 2 of 39S ribosomal protein L47 mitochondrial OS=Homo sapiens OX=9606 GN=MRPL47	Q9HD33-2|RM47_HUMAN	Q9HD33-2	RM47_HUMAN	2	RM47	2080	6144	123.17	27086	2	12	8.00276	7.06102	7.2651	8.62582	9.08595	9.10635				TRUE	TRUE
+	1.42175	0.0378665		-1.3682	Isoform 3 of Hsp70-binding protein 1 OS=Homo sapiens OX=9606 GN=HSPBP1	Q9NZL4-3|HPBP1_HUMAN	Q9NZL4-3	HPBP1_HUMAN	3	HPBP1	1764	3867	238.83	44303	10	41	7.75302	7.30761	6.38871	8.39493	8.253	8.90599				TRUE	TRUE
+	2.43534	0.00366998		-4.06107	Transmembrane 9 superfamily member 2 OS=Homo sapiens OX=9606 GN=TM9SF2 PE=1 SV=1	Q99805|TM9S2_HUMAN	Q99805	TM9S2_HUMAN		TM9S2	2444	4452	152.22	75776	5	11	2.98003	4.6153	4.63633	7.75422	7.76534	8.8953				TRUE	TRUE
+	1.91384	0.0121943		-1.18525	Isoform 3 of UV excision repair protein RAD23 homolog A OS=Homo sapiens OX=9606 GN=RAD23A	P54725-3|RD23A_HUMAN	P54725-3	RD23A_HUMAN	3	RD23A	1946	5421	213.22	39538	8	42	8.37369	7.66541	7.57297	8.88044	9.23384	9.05355				TRUE	TRUE
+	1.79003	0.0162169		-1.57165	Tripeptidyl-peptidase 1 OS=Homo sapiens OX=9606 GN=TPP1 PE=1 SV=2	O14773|TPP1_HUMAN	O14773	TPP1_HUMAN		TPP1	2386	6175	166.92	61248	3	7	6.75368	7.73505	7.97774	8.82642	9.23671	9.11829				TRUE	TRUE
+	2.89873	0.00126261		-1.67949	Isoform 2 of Brain-specific angiogenesis inhibitor 1-associated protein 2 OS=Homo sapiens OX=9606 GN=BAIAP2	Q9UQB8-2|BAIP2_HUMAN	Q9UQB8-2	BAIP2_HUMAN	2	BAIP2	1200	1882	285.04	59014	11	34	8.8158	8.4623	8.62172	10.1928	10.6674	10.0781				TRUE	TRUE
-	1.24294	0.057156		-3.1693	Calcium-binding mitochondrial carrier protein SCaMC-1 OS=Homo sapiens OX=9606 GN=SLC25A24 PE=1 SV=2	Q6NUK1|SCMC1_HUMAN	Q6NUK1	SCMC1_HUMAN		SCMC1	1996	3837	208.05	53354	7	22	6.61029	2.93573	3.774	7.64623	6.82197	8.35971				FALSE	TRUE
+	2.88695	0.00129732		-1.06857	Exosome component 10 OS=Homo sapiens OX=9606 GN=EXOSC10 PE=1 SV=2	Q01780|EXOSX_HUMAN	Q01780	EXOSX_HUMAN		EXOSX	1545	3049	231.47	100831	11	21	7.89288	7.64147	7.53232	8.60196	8.81006	8.86037				TRUE	TRUE
+	1.81157	0.0154321		-1.19772	Aspartate--tRNA ligase mitochondrial OS=Homo sapiens OX=9606 GN=DARS2 PE=1 SV=1	Q6PI48|SYDM_HUMAN	Q6PI48	SYDM_HUMAN		SYDM	1433	2274	228.58	73563	11	28	7.55436	7.51924	8.18963	9.26271	8.57954	9.01413				TRUE	TRUE
+	2.59097	0.00256468		-1.02021	Isoform 2 of SWI/SNF-related matrix-associated actin-dependent regulator of chromatin subfamily E member 1 OS=Homo sapiens OX=9606 GN=SMARCE1	Q969G3-2|SMCE1_HUMAN	Q969G3-2	SMCE1_HUMAN	2	SMCE1	1465	2573	213.13	41780	8	26	8.01497	7.89239	8.36619	9.19719	9.12601	9.01098				TRUE	TRUE
+	3.27967	0.000525207		-2.01365	Proprotein convertase subtilisin/kexin type 9 OS=Homo sapiens OX=9606 GN=PCSK9 PE=1 SV=3	Q8NBP7|PCSK9_HUMAN	Q8NBP7	PCSK9_HUMAN		PCSK9	1481	4174	229.63	74286	6	16	6.38853	7.03694	6.73823	8.7656	8.61261	8.82645				TRUE	TRUE
+	2.75971	0.00173897		-2.25748	NADH dehydrogenase [ubiquinone] flavoprotein 1 mitochondrial OS=Homo sapiens OX=9606 GN=NDUFV1 PE=1 SV=4	P49821|NDUV1_HUMAN	P49821	NDUV1_HUMAN		NDUV1	1990	4099	191.06	50817	9	29	6.94357	6.6585	7.22535	9.70824	8.90376	8.98786				TRUE	TRUE
+	1.69611	0.0201321		-1.80765	Protein POF1B OS=Homo sapiens OX=9606 GN=POF1B PE=1 SV=3	Q8WVV4|POF1B_HUMAN	Q8WVV4	POF1B_HUMAN		POF1B	1503	3664	237.38	68065	8	19	7.21169	5.82146	7.2213	8.374	8.48856	8.81484				TRUE	TRUE
+	2.44751	0.00356851		-1.69726	3-hydroxyisobutyryl-CoA hydrolase mitochondrial OS=Homo sapiens OX=9606 GN=HIBCH PE=1 SV=2	Q6NVY1|HIBCH_HUMAN	Q6NVY1	HIBCH_HUMAN		HIBCH	1891	2457	183.06	43482	7	22	7.06706	6.53201	7.29333	8.77676	8.34594	8.86149				TRUE	TRUE
+	1.71663	0.019203		-1.51842	Isoform 2 of 28S ribosomal protein S27 mitochondrial OS=Homo sapiens OX=9606 GN=MRPS27	Q92552-2|RT27_HUMAN	Q92552-2	RT27_HUMAN	2	RT27	1525	3737	195.76	49150	6	22	7.64566	6.58751	7.88344	8.84439	8.8591	8.96838				TRUE	TRUE
+	2.409	0.00389944		-1.65421	39S ribosomal protein L13 mitochondrial OS=Homo sapiens OX=9606 GN=MRPL13 PE=1 SV=1	Q9BYD1|RM13_HUMAN	Q9BYD1	RM13_HUMAN		RM13	1937	5327	191.12	20692	5	48	6.69404	7.33163	7.27146	8.37981	8.94723	8.93275				TRUE	TRUE
+	3.63882	0.000229709		-1.23223	Isoform 5 of Atlastin-2 OS=Homo sapiens OX=9606 GN=ATL2	Q8NHH9-5|ATLA2_HUMAN	Q8NHH9-5	ATLA2_HUMAN	5	ATLA2	1854	4287	219.15	64522	4	17	7.74356	7.4623	7.72921	8.80716	8.91319	8.91139				TRUE	TRUE
+	3.99915	0.000100195		1.51069	Protein Niban 1 OS=Homo sapiens OX=9606 GN=NIBAN1 PE=1 SV=1	Q9BZQ8|NIBA1_HUMAN	Q9BZQ8	NIBA1_HUMAN		NIBA1	1210	1471	223.62	103135	10	17	10.6093	10.5378	10.3258	8.9222	9.07323	8.94541				TRUE	TRUE
+	3.26386	0.000544676		1.55261	Isoform 2 of Annexin A11 OS=Homo sapiens OX=9606 GN=ANXA11	P50995-2|ANX11_HUMAN	P50995-2	ANX11_HUMAN	2	ANX11	1504	2668	222.07	51242	7	18	10.4592	10.5163	10.6737	8.74876	9.23336	9.00927				TRUE	TRUE
-	1.00911	0.0979241		-2.46068	Isoform 2 of Ubiquitin carboxyl-terminal hydrolase 22 OS=Homo sapiens OX=9606 GN=USP22	Q9UPT9-2|UBP22_HUMAN	Q9UPT9-2	UBP22_HUMAN	2	UBP22	2593	6700	154.2	58179	3	10	4.07895	6.76235	7.91109	8.43108	8.81737	8.88597				FALSE	TRUE
+	3.5721	0.000267853		-1.34044	Multifunctional methyltransferase subunit TRM112-like protein OS=Homo sapiens OX=9606 GN=TRMT112 PE=1 SV=1	Q9UI30|TR112_HUMAN	Q9UI30	TR112_HUMAN		TR112	2390	20017	145.62	14199	3	32	7.33298	7.34287	7.56674	8.71788	8.63757	8.90845				TRUE	TRUE
+	2.44439	0.00359427		-1.40359	Nuclear ubiquitous casein and cyclin-dependent kinase substrate 1 OS=Homo sapiens OX=9606 GN=NUCKS1 PE=1 SV=1	Q9H1E3|NUCKS_HUMAN	Q9H1E3	NUCKS_HUMAN		NUCKS	1866	3812	170.6	27296	5	26	7.21004	7.69697	7.98334	9.02403	9.10559	8.97149				TRUE	TRUE
+	1.81607	0.0152731		-1.33858	Clustered mitochondria protein homolog OS=Homo sapiens OX=9606 GN=CLUH PE=1 SV=2	O75153|CLU_HUMAN	O75153	CLU_HUMAN		CLU	1637	2189	235.02	146669	10	11	7.28179	6.98242	6.36527	8.05355	8.00062	8.59107				TRUE	TRUE
+	4.25615	5.5443e-05		1.16141	Cornifin-B OS=Homo sapiens OX=9606 GN=SPRR1B PE=1 SV=2	P22528|SPR1B_HUMAN	P22528	SPR1B_HUMAN		SPR1B	2249	5729	154.79	9888	1	44	10.087	10.0301	9.93915	8.76205	8.91238	8.8976				TRUE	TRUE
+	1.72536	0.0188209		-1.47132	SWI/SNF complex subunit SMARCC1 OS=Homo sapiens OX=9606 GN=SMARCC1 PE=1 SV=3	Q92922|SMRC1_HUMAN	Q92922	SMRC1_HUMAN		SMRC1	1137	1101	264.56	122867	11	19	6.67737	7.80632	7.27947	8.31985	8.98359	8.87369				TRUE	TRUE
+	2.08656	0.00819291		-1.28386	Hepatocyte growth factor-regulated tyrosine kinase substrate OS=Homo sapiens OX=9606 GN=HGS PE=1 SV=1	O14964|HGS_HUMAN	O14964	HGS_HUMAN		HGS	2219	4056	194.43	86192	7	14	7.9486	8.15234	7.40829	9.3969	8.92834	9.03557				TRUE	TRUE
+	3.2719	0.000534693		-1.73188	Complex I intermediate-associated protein 30 mitochondrial OS=Homo sapiens OX=9606 GN=NDUFAF1 PE=1 SV=2	Q9Y375|CIA30_HUMAN	Q9Y375	CIA30_HUMAN		CIA30	1206	3430	209.32	37764	6	25	6.99605	6.92873	7.47094	8.84358	8.88081	8.86697				TRUE	TRUE
+	1.59343	0.0255017		-1.31418	Trophoblast glycoprotein OS=Homo sapiens OX=9606 GN=TPBG PE=1 SV=1	Q13641|TPBG_HUMAN	Q13641	TPBG_HUMAN		TPBG	2324	7146	184.54	46032	5	14	6.44195	6.60851	7.4888	7.87184	8.08034	8.52963				TRUE	TRUE
+	4.41382	3.85638e-05		2.60125	Sterile alpha motif domain-containing protein 9 OS=Homo sapiens OX=9606 GN=SAMD9 PE=1 SV=1	Q5K651|SAMD9_HUMAN	Q5K651	SAMD9_HUMAN		SAMD9	495	342	371	184280	27	24	11.3071	11.0601	11.272	8.64006	8.41481	8.78061				TRUE	TRUE
+	4.56973	2.69324e-05		2.93147	Ubiquitin-like protein ISG15 OS=Homo sapiens OX=9606 GN=ISG15 PE=1 SV=5	P05161|ISG15_HUMAN	P05161	ISG15_HUMAN		ISG15	709	4041	283.01	17888	9	50	12.311	12.537	12.3353	9.65005	9.485	9.25378				TRUE	TRUE
+	2.46478	0.0034294		-1.34892	Isoform 2 of Alpha-adducin OS=Homo sapiens OX=9606 GN=ADD1	P35611-2|ADDA_HUMAN	P35611-2	ADDA_HUMAN	2	ADDA	1473	2312	231.52	69985	9	26	7.76109	7.20496	7.84518	9.11733	8.88914	8.8515				TRUE	TRUE
+	4.07089	8.49391e-05		-1.72336	NADH dehydrogenase [ubiquinone] 1 beta subcomplex subunit 10 OS=Homo sapiens OX=9606 GN=NDUFB10 PE=1 SV=3	O96000|NDUBA_HUMAN	O96000	NDUBA_HUMAN		NDUBA	2248	6309	173.89	20777	5	33	6.72846	6.77584	7.0009	8.44704	8.55532	8.67292				TRUE	TRUE
+	2.39575	0.00402022		1.22588	Isoform 2 of PDZ and LIM domain protein 7 OS=Homo sapiens OX=9606 GN=PDLIM7	Q9NR12-2|PDLI7_HUMAN	Q9NR12-2	PDLI7_HUMAN	2	PDLI7	1411	2820	222.42	46510	6	22	9.90059	9.34299	9.74218	8.2181	8.44779	8.64223				TRUE	TRUE
+	6.0666	8.57829e-07		-1.22949	Cytochrome b-c1 complex subunit 6 mitochondrial OS=Homo sapiens OX=9606 GN=UQCRH PE=1 SV=2	P07919|QCR6_HUMAN	P07919	QCR6_HUMAN		QCR6	3088	12159	125.55	10739	2	30	7.57886	7.59261	7.62081	8.79455	8.86487	8.82133				TRUE	TRUE
-	1.08116	0.0829542		-2.86223	Transmembrane protein 14C OS=Homo sapiens OX=9606 GN=TMEM14C PE=1 SV=1	Q9P0S9|TM14C_HUMAN	Q9P0S9	TM14C_HUMAN		TM14C	3093	14464	113.38	11565	2	24	6.80735	2.77183	5.55888	7.24641	8.01681	8.46152				FALSE	TRUE
+	2.19928	0.00631998		-3.55544	Prefoldin subunit 4 OS=Homo sapiens OX=9606 GN=PFDN4 PE=1 SV=1	Q9NQP4|PFD4_HUMAN	Q9NQP4	PFD4_HUMAN		PFD4	4095	10611	88.03	15314	2	17	3.71988	5.75168	4.17187	8.19894	7.5719	8.53893				TRUE	TRUE
+	2.74214	0.00181075		-1.18942	Isoform 3 of Acyl-CoA-binding protein OS=Homo sapiens OX=9606 GN=DBI	P07108-3|ACBP_HUMAN	P07108-3	ACBP_HUMAN	3	ACBP	2354	6015	139.62	10145	4	53	8.02907	7.64241	7.89899	9.01173	9.26007	8.86694				TRUE	TRUE
+	2.53992	0.00288454		-3.82129	Serine/threonine-protein kinase PAK 4 OS=Homo sapiens OX=9606 GN=PAK4 PE=1 SV=1	O96013|PAK4_HUMAN	O96013	PAK4_HUMAN		PAK4	3205	5019	93.06	64072	2	4	4.69876	3.23825	4.96331	7.71115	8.11108	8.54195				TRUE	TRUE
+	2.78772	0.00163034		2.38698	Laminin subunit beta-3 OS=Homo sapiens OX=9606 GN=LAMB3 PE=1 SV=1	Q13751|LAMB3_HUMAN	Q13751	LAMB3_HUMAN		LAMB3	1136	528	303.46	129572	15	21	10.5503	10.1322	10.2261	8.08332	7.35368	8.31061				TRUE	TRUE
+	2.22715	0.00592723		-1.61427	Endoplasmic reticulum mannosyl-oligosaccharide 1 2-alpha-mannosidase OS=Homo sapiens OX=9606 GN=MAN1B1 PE=1 SV=2	Q9UKM7|MA1B1_HUMAN	Q9UKM7	MA1B1_HUMAN		MA1B1	1551	2715	219.94	79580	8	19	7.22178	6.5489	7.48067	8.88111	8.47334	8.73971				TRUE	TRUE
+	1.71214	0.0194027		-1.35445	Polymerase delta-interacting protein 2 OS=Homo sapiens OX=9606 GN=POLDIP2 PE=1 SV=1	Q9Y2S7|PDIP2_HUMAN	Q9Y2S7	PDIP2_HUMAN		PDIP2	1830	2175	229.39	42033	8	27	7.5585	6.55597	6.72778	7.9542	8.39399	8.55743				TRUE	TRUE
+	2.41206	0.00387206		-1.15094	Succinate dehydrogenase [ubiquinone] iron-sulfur subunit mitochondrial OS=Homo sapiens OX=9606 GN=SDHB PE=1 SV=3	P21912|SDHB_HUMAN	P21912	SDHB_HUMAN		SDHB	1808	5217	178.47	31630	5	19	7.0207	7.49209	7.49721	8.33535	8.42974	8.69773				TRUE	TRUE
+	1.7332	0.0184843		-1.82941	Methylsterol monooxygenase 1 OS=Homo sapiens OX=9606 GN=MSMO1 PE=1 SV=1	Q15800|MSMO1_HUMAN	Q15800	MSMO1_HUMAN		MSMO1	2086	17815	132.91	35216	2	10	6.66718	7.7443	7.85605	9.82787	9.00456	8.92333				TRUE	TRUE
+	1.89505	0.0127336		-1.46501	Isoform Cytoplasmic of Cysteine desulfurase mitochondrial OS=Homo sapiens OX=9606 GN=NFS1	Q9Y697-2|NFS1_HUMAN	Q9Y697-2	NFS1_HUMAN	2	NFS1	1848	2673	211.83	44017	6	22	7.71211	7.0045	6.59738	8.69617	8.36689	8.64598				TRUE	TRUE
+	3.43479	0.000367463		-1.55421	NADH dehydrogenase [ubiquinone] 1 beta subcomplex subunit 5 mitochondrial OS=Homo sapiens OX=9606 GN=NDUFB5 PE=1 SV=1	O43674|NDUB5_HUMAN	O43674	NDUB5_HUMAN		NDUB5	2527	5802	142.23	21750	3	23	6.897	6.98151	6.80077	8.19707	8.51688	8.62797				TRUE	TRUE
+	1.7372	0.0183148		-2.01507	WD repeat and HMG-box DNA-binding protein 1 OS=Homo sapiens OX=9606 GN=WDHD1 PE=1 SV=1	O75717|WDHD1_HUMAN	O75717	WDHD1_HUMAN		WDHD1	1444	2097	250.1	125967	10	14	7.23506	5.44559	6.54164	8.36532	8.37591	8.52626				TRUE	TRUE
-	3.12426	0.000751165		-0.986472	Synaptosomal-associated protein 23 OS=Homo sapiens OX=9606 GN=SNAP23 PE=1 SV=1	O00161|SNP23_HUMAN	O00161	SNP23_HUMAN		SNP23	2001	6439	186.79	23354	5	28	7.86332	7.51001	7.59671	8.64382	8.63804	8.6476				TRUE	FALSE
+	2.82072	0.00151106		-1.08639	Transcription factor A mitochondrial OS=Homo sapiens OX=9606 GN=TFAM PE=1 SV=1	Q00059|TFAM_HUMAN	Q00059	TFAM_HUMAN		TFAM	2247	5082	157.47	29097	4	22	7.44452	7.45105	7.86586	8.64667	8.70932	8.66459				TRUE	TRUE
+	2.89598	0.00127062		-1.27548	Integrator complex subunit 13 OS=Homo sapiens OX=9606 GN=INTS13 PE=1 SV=2	Q9NVM9|INT13_HUMAN	Q9NVM9	INT13_HUMAN		INT13	1631	2833	226.13	80225	8	16	7.71266	7.32085	7.24155	8.81916	8.62007	8.66228				TRUE	TRUE
+	2.65746	0.00220061		-1.26871	39S ribosomal protein L37 mitochondrial OS=Homo sapiens OX=9606 GN=MRPL37 PE=1 SV=2	Q9BZE1|RM37_HUMAN	Q9BZE1	RM37_HUMAN		RM37	2453	4616	200.78	48118	5	22	7.11155	7.25191	7.16601	8.09175	8.62903	8.61482				TRUE	TRUE
+	2.49124	0.00322672		-5.13837	NADH dehydrogenase [ubiquinone] 1 alpha subcomplex subunit 10 mitochondrial OS=Homo sapiens OX=9606 GN=NDUFA10 PE=1 SV=1	O95299|NDUAA_HUMAN	O95299	NDUAA_HUMAN		NDUAA	2096	3174	209.63	40751	6	28	2.77647	2.41123	5.01472	8.51731	8.49997	8.60025				TRUE	TRUE
+	1.57548	0.0265776		-1.44546	Cullin-3 OS=Homo sapiens OX=9606 GN=CUL3 PE=1 SV=2	Q13618|CUL3_HUMAN	Q13618	CUL3_HUMAN		CUL3	2310	3036	209.66	88930	9	17	5.94626	6.26491	5.95443	7.67412	6.72274	8.10512				TRUE	TRUE
+	3.33338	0.000464113		-1.18036	Isoform 4 of Triple functional domain protein OS=Homo sapiens OX=9606 GN=TRIO	O75962-4|TRIO_HUMAN	O75962-4	TRIO_HUMAN	4	TRIO	1381	852	258.56	341599	12	6	7.21072	7.17393	7.30843	8.57694	8.21689	8.44033				TRUE	TRUE
+	3.04136	0.000909157		-1.91224	28S ribosomal protein S7 mitochondrial OS=Homo sapiens OX=9606 GN=MRPS7 PE=1 SV=2	Q9Y2R9|RT07_HUMAN	Q9Y2R9	RT07_HUMAN		RT07	1767	5480	205.43	28134	7	33	7.24631	6.97854	6.62907	9.10415	8.7829	8.70359				TRUE	TRUE
+	2.43655	0.00365974		2.2475	Isoform 4 of Cellular nucleic acid-binding protein OS=Homo sapiens OX=9606 GN=CNBP	P62633-4|CNBP_HUMAN	P62633-4	CNBP_HUMAN	4	CNBP	1720	4313	209.23	19592	5	33	10.3427	10.5636	10.5641	8.63165	7.52105	8.57516				TRUE	TRUE
+	2.3737	0.00422962		-1.11667	Isoform Er16 of Ankyrin-1 OS=Homo sapiens OX=9606 GN=ANK1	P16157-2|ANK1_HUMAN	P16157-2	ANK1_HUMAN	2	ANK1	1246	1111	276.16	166479	12	16	7.09824	7.6987	7.49354	8.6611	8.41257	8.56682				TRUE	TRUE
+	1.99015	0.0102294		-2.11439	Isoform 2 of Prolyl 4-hydroxylase subunit alpha-1 OS=Homo sapiens OX=9606 GN=P4HA1	P13674-2|P4HA1_HUMAN	P13674-2	P4HA1_HUMAN	2	P4HA1	1488	2223	232.45	60967	10	22	7.02625	5.53605	5.83491	8.20296	8.13432	8.4031				TRUE	TRUE
+	2.93209	0.00116926		-1.30066	NADH dehydrogenase [ubiquinone] 1 alpha subcomplex subunit 5 OS=Homo sapiens OX=9606 GN=NDUFA5 PE=1 SV=3	Q16718|NDUA5_HUMAN	Q16718	NDUA5_HUMAN		NDUA5	2279	6501	197.92	13459	5	66	7.3285	7.41473	7.46923	9.00795	8.53489	8.5716				TRUE	TRUE
[truncated: 3,464 more rows]

## Sheet: up- and down-regulated proteins
Protein		Gene ID	UniprotID	Protein		Gene ID	UniprotID
P21399	P21399	ACO1	ACOC_HUMAN	P11021	P11021	HSPA5	BIP_HUMAN			downregulated proteins
[truncated: 544 more rows]

## Sheet: cellcomponent_RS35d_downreg
Term	P-value	log	Adjusted P-value	Odds Ratio	Combined Score	Genes
[truncated: 261 more rows]

[truncated: 9 more sheets: molfunction_RS35d_downreg, biologicalprocess_RS35d_downreg, cellcomponent_RS35d_upreg, molfunction_RS35d_upreg, biologicalprocess_RS35d_upreg, BioGRID RAD51 - Nov23, BioGRID ATM - jan24, BioGRID ATR - jan24, BioGRID DNA-PKcs - jan24]
